# Supplementary material for: Diversity-oriented synthesis of fluoroalkylated amines via the palladium-catalyzed divergent fluoroalkylamination of 1,3-dienes
Source: Royal Society of Chemistry journal article supplement (doi:10.1039/d2cc00983h), 2022-01-01

# Supporting Information

## **Diversity-Oriented Synthesis of Fluoroalkylated Amines via Palladium-Catalyzed Divergent Fluoroalkylation of 1,3-Dienes**

Chen Fu,<sup>[b]†</sup> Zhaosheng Zhang,<sup>[b]†</sup> Yuzhen Li,<sup>[b]</sup> Dongni Gao<sup>[b]</sup> Zining Cui,<sup>\*[b]</sup> and Zhaodong Li<sup>\*[a][c]</sup>

[a] State Key Laboratory for Conservation and Utilization of Subtropical Agrobioresources, College of Materials and Energy, South China Agricultural University, Guangzhou 510642, China. E-mail: scaulizhaodong@scau.edu.cn.

[b] Integrative Microbiology Research Centre, Guangdong Province Key Laboratory of Microbial Signals and Disease Control, South China Agricultural University, Guangzhou, 510642, China. E-mail: ziningcui@scau.edu.cn.

[c] Guangdong Provincial Key Laboratory of Catalysis, Southern University of Science and Technology, Shenzhen, China. E-mail: scaulizhaodong@scau.edu.cn.

<sup>†</sup>These authors contributed equally to this work.

## Table of Content

|                                                                                                               |            |
|---------------------------------------------------------------------------------------------------------------|------------|
| <b>1. General Information .....</b>                                                                           | <b>S3</b>  |
| <b>2. List of Substrates .....</b>                                                                            | <b>S4</b>  |
| <b>3. Optimization of Reaction Conditions .....</b>                                                           | <b>S6</b>  |
| <b>4. General Experimental Procedures for<br/>Diversity-Oriented Synthesis of Fluoroalkylated Amines.....</b> | <b>S12</b> |
| <b>5. Control Experiment .....</b>                                                                            | <b>S14</b> |
| <b>6. Characterization Data for New Products .....</b>                                                        | <b>S15</b> |
| <b>7. References .....</b>                                                                                    | <b>S53</b> |
| <b>8. NMR Spectra of New Products.....</b>                                                                    | <b>S55</b> |

## 1. General Information

### 1.1 Analytical Methods

$^1\text{H}$ ,  $^{13}\text{C}$  and  $^{19}\text{F}$  NMR data were measured on a Bruker Avance-III 600 (600MHz for  $^1\text{H}$ , 151 MHz for  $^{13}\text{C}$  NMR spectroscopy) using  $\text{CDCl}_3$  as the solvent. Chemical shifts are reported in parts per million (ppm,  $\delta$ ), downfield from tetramethylsilane (TMS,  $\delta = 0.00$  ppm) and are referenced to residual solvent ( $\text{CDCl}_3$ ,  $\delta = 7.26$  ppm ( $^1\text{H}$ ) and 77.16 ppm ( $^{13}\text{C}$ )). The following abbreviations (or combinations thereof) were used to explain chemical shift ( $\delta$  ppm), multiplicity (s = singlet, d = doublet, t = triplet, q = quartet, m = multiplet), integration, and coupling constants ( $J$ ) in hertz (Hz). IR spectra were measured on a Nicolet IS10. Mass spectra were measured on an Agilent GC-MS5975C Plus spectrometer (EI). HRMS (ESI) analysis was measured on a Q Exactive<sup>TM</sup> Plus Orbitrap. Melting points were measured using a melting point instrument and are uncorrected.

### 1.2 Materials

All anhydrous solvents, phosphine ligands and NBE derivatives mentioned in this text were bought from commercial sources and used as received without purification. Analytical thin-layer chromatography was performed on 0.20 mm silica gel plates (GF254) using UV light or phosphomolybdic acid as a visualizing agent. Flash column chromatography was carried out using silica gel (200-300 mesh) with the indicated solvent system. All reactions were conducted in oven-dried Schlenk tubes.

## 2. List of Substrates

### (a) Synthesis of 1,3-dienes

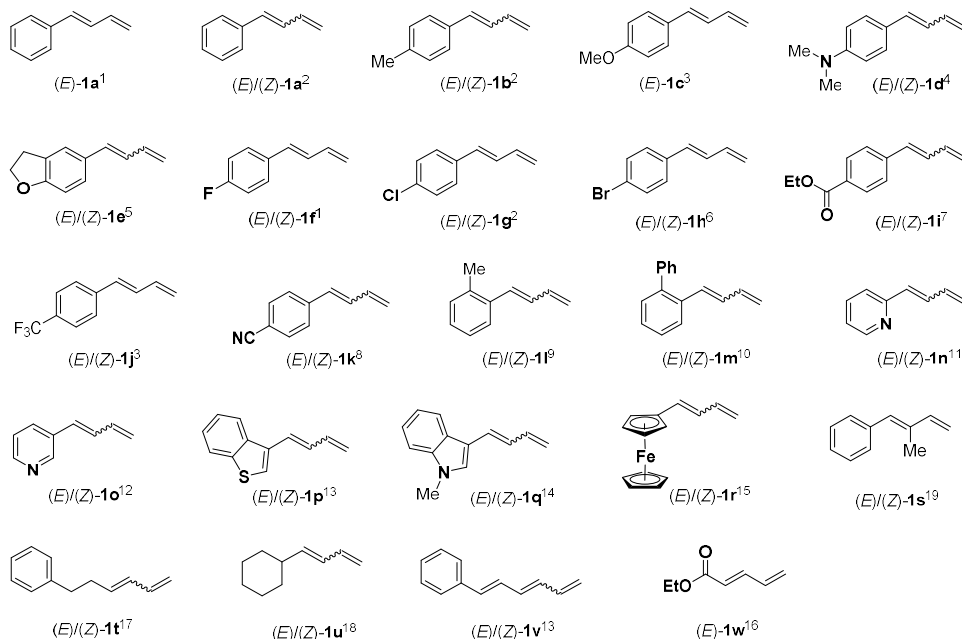

Dienes (*E*)-**1a**, **1c**, **1f** - **1h**, **1j** and **1s** were synthesized via Wittig reaction using methyltriphenylphosphonium bromide.<sup>1, 3, 6, 19</sup>

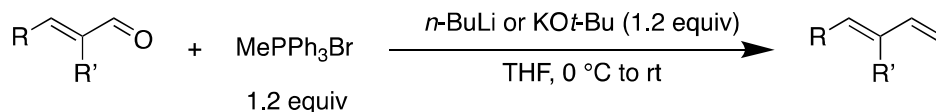

Dienes with a mixture of (*E*)/(*Z*) were synthesized via Wittig reaction using allyltriphenylphosphonium bromide.<sup>2, 4-5, 7-15, 17-18</sup>

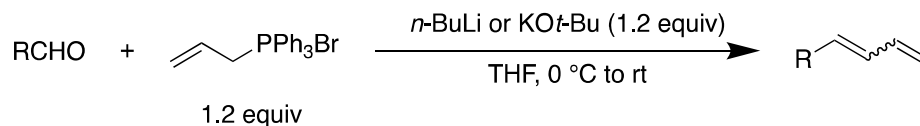

Dienes **1w** was synthesized according to literature reference.<sup>16</sup>

## (b) Synthesis of but-3-en-1-yn-1-ylbenzene

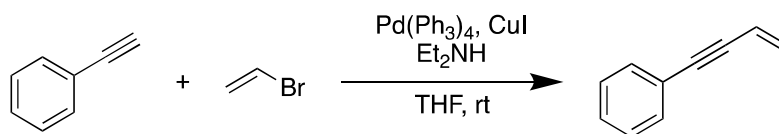

But-3-en-1-yn-1-ylbenzene was synthesized according to literature references.<sup>20</sup>

## Synthesis of amines

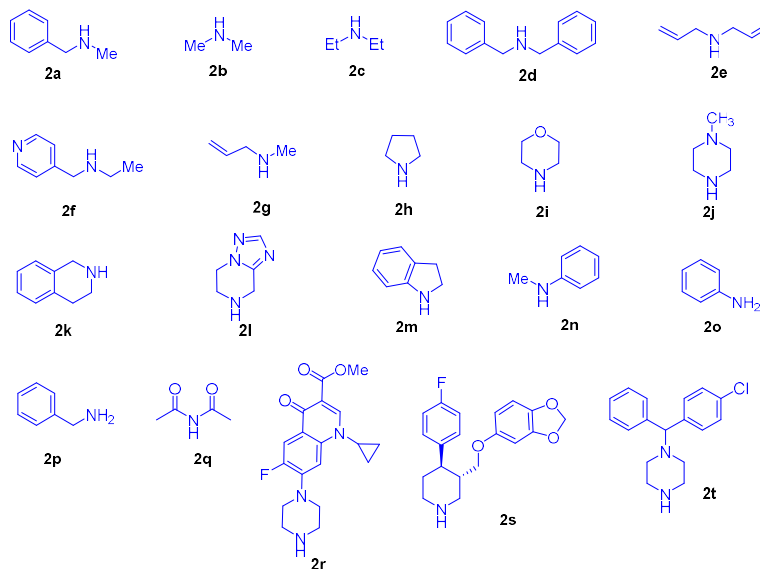

Amines **2a** - **2q**, **2s** and **2t** are commercially available.

Ciprofloxacin methyl ester **2r** was synthesized according to literature reference.<sup>21</sup>

### 3. Optimization of Reaction Conditions

#### (1) Optimization of Solvents

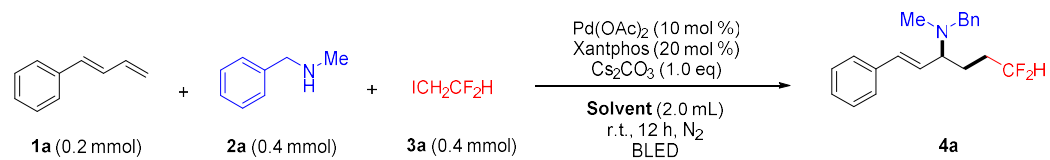

| Entry | Solvent                | Yield (%) |
|-------|------------------------|-----------|
| 1     | THF                    | 0         |
| 2     | DCM                    | 55        |
| 3     | DCE                    | 53        |
| 4     | Toluene                | 33        |
| 5     | $\text{CH}_3\text{CN}$ | 20        |
| 6     | Dioxane                | 25        |
| 7     | DMF                    | trace     |
| 8     | Hexane                 | 9         |

## (2) Optimization of [Pd] catalysts

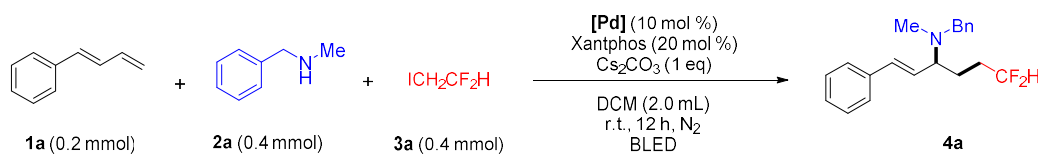

| Entry | Pd source                                           | Yield (%) |
|-------|-----------------------------------------------------|-----------|
| 1     | Pd(OAc) <sub>2</sub>                                | 55        |
| 2     | PdCl <sub>2</sub>                                   | 55        |
| 3     | <b>Pd(TFA)<sub>2</sub></b>                          | <b>54</b> |
| 4     | PdCl <sub>2</sub> (CH <sub>3</sub> CN) <sub>2</sub> | 54        |
| 5     | Pd[P(Ph) <sub>3</sub> ] <sub>4</sub>                | 35        |
| 6     | PdCl <sub>2</sub> (PhCN) <sub>2</sub>               | 55        |
| 7     | PdCl <sub>2</sub> (PPh <sub>3</sub> ) <sub>2</sub>  | 55        |
| 8     | PdCl <sub>2</sub> (dppf)                            | 55        |
| 9     | Pd(dba) <sub>2</sub>                                | 43        |
| 10    | PdCl <sub>2</sub> (dippf)                           | 40        |
| 11    | Pd <sub>2</sub> (dba) <sub>3</sub>                  | 51        |
| 12    | (dppe)PdCl <sub>2</sub>                             | 31        |

### (3) Optimization of Bases

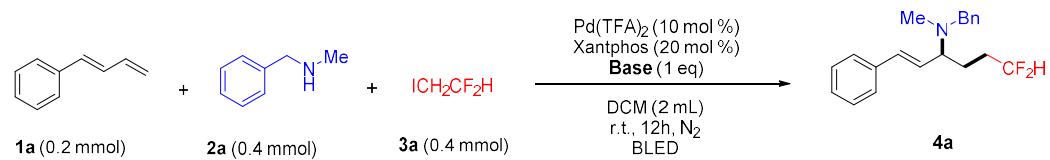

| Entry | Base                            | Yield (%) |
|-------|---------------------------------|-----------|
| 1     | Cs <sub>2</sub> CO <sub>3</sub> | 54        |
| 2     | K <sub>2</sub> CO <sub>3</sub>  | 21        |
| 3     | Na <sub>2</sub> CO <sub>3</sub> | 25        |
| 4     | DIPEA                           | 19        |
| 5     | TEA                             | 35        |
| 6     | LiOH                            | 33        |
| 7     | CH <sub>3</sub> COOK            | 25        |
| 8     | KH <sub>2</sub> PO <sub>4</sub> | 20        |
| 9     | Pyridine                        | 15        |
| 10    | K <sub>3</sub> PO <sub>4</sub>  | 35        |
| 11    | Li <sub>2</sub> CO <sub>3</sub> | 23        |



#### (4) Optimization of Ligands

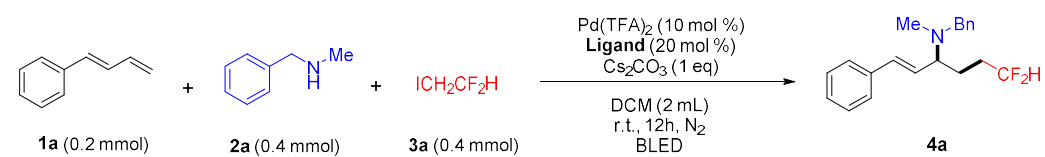

| Entry | Ligand                        | Yield (%) |
|-------|-------------------------------|-----------|
| 1     | Xantphos                      | 54        |
| 2     | BINAP                         | 34        |
| 3     | DPPP                          | 0         |
| 4     | Tri- <i>o</i> -tolylphosphine | 0         |
| 5     | DPPPY                         | 0         |
| 6     | 2,2'-Bipyridine               | trace     |
| 7     | 1,10-Phenanthroline           | trace     |
| 8     | DPEPHOS                       | 31        |
| 9     | Cyclohexyldiphenylphosphine   | 0         |
| 10    | JohnPhos                      | 0         |
| 11    | RuPhos                        | 0         |
| 12    | 2,2'-Biquinoline              | 0         |

### (5) Optimization of Additives

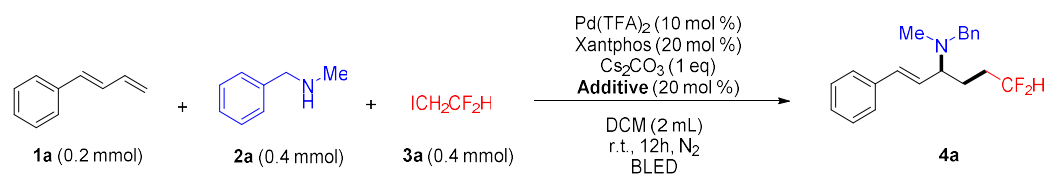

| Entry    | Additive                         | Yield (%) |
|----------|----------------------------------|-----------|
| 1        | AgOAc                            | 30        |
| 2        | Ag <sub>2</sub> CO <sub>3</sub>  | 8         |
| 3        | CF <sub>3</sub> COOAg            | 46        |
| 4        | Ni(OTf) <sub>2</sub>             | 55        |
| 5        | KPF <sub>6</sub>                 | 20        |
| 6        | Me <sub>3</sub> OBF <sub>4</sub> | 18        |
| 7        | AgNTf <sub>2</sub>               | 15        |
| <b>8</b> | <b>NaNTf<sub>2</sub></b>         | <b>60</b> |

### (6) Optimization of Time

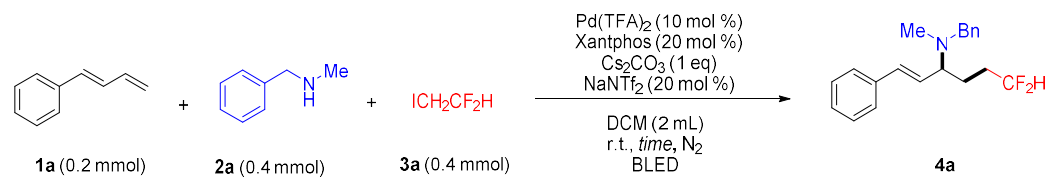

| Entry | Time | Yield (%) |
|-------|------|-----------|
| 1     | 18   | 65        |
| 2     | 24   | 70        |
| 3     | 36   | 73        |

### (7) Optimization of Reactant Ratio

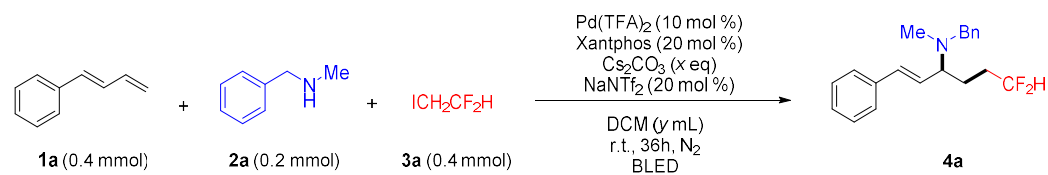

| Entry | x   | y | Yield (%) |
|-------|-----|---|-----------|
| 1     | 1   | 2 | 74        |
| 2     | 1.5 | 2 | 76        |
| 3     | 1.5 | 4 | 80        |

## 4. General Experimental Procedures for Diversity-Oriented Synthesis of Fluoroalkylated Amines

### General Experimental Procedure A

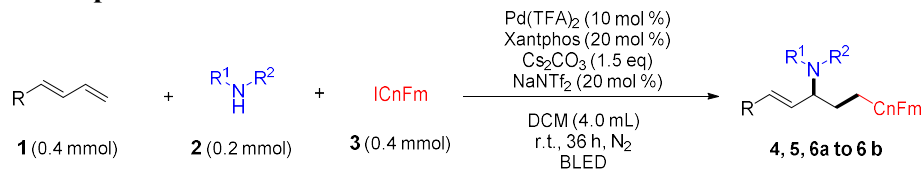

A 10 mL sealed tube (with a Teflon cap) equipped with a magnetic stir bar was charged with Pd(TFA)<sub>2</sub> (0.02 mmol, 10 mol%), Xantphos (0.04 mmol, 20 mol%), NaNTf<sub>2</sub> (0.04 mmol, 20 mol%) and Cs<sub>2</sub>CO<sub>3</sub> (0.3 mmol, 1.5 equiv). Then DCM (2.0 mL) was added to the mixture, followed by 1,3-diene (0.4 mmol) **1**, fluoroalkyl iodide **3** (0.4 mmol) and amine **2** (0.2 mmol) via microsyringe. Finally, another portion of DCM (2.0 mL) was added. The tube was subsequently put at the center of a stir plate and irradiated with blue LEDs. The reaction was stirred vigorously (700 rpm) with cooling by a fan. After 36 hours, the resulting mixture was extracted with DCM (3 x 15 mL) and the combined organic layers were dried over anhydrous Na<sub>2</sub>SO<sub>4</sub>. After removal of the solvent under reduced pressure, the crude product was purified by column chromatography on silica gel to give the product **4**, **5** or **6a** to **6b**.

### (2) General Experimental Procedure B

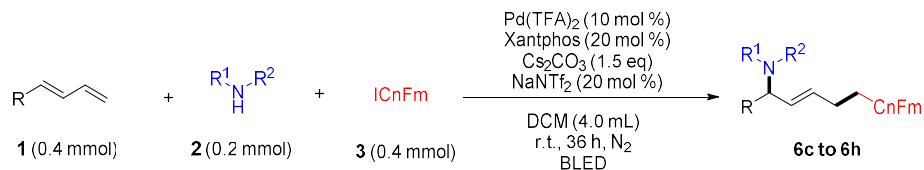

A 10 mL sealed tube (with a Teflon cap) equipped with a magnetic stir bar was charged with Pd(TFA)<sub>2</sub> (0.02 mmol, 10 mol%), Xantphos (0.04 mmol, 20 mol%), NaNTf<sub>2</sub> (0.04 mmol, 20 mol%) and Cs<sub>2</sub>CO<sub>3</sub> (0.3 mmol, 1.5 equiv). Then DCM (2.0 mL) was added to the mixture, followed by 1,3-diene (0.4 mmol), fluoroalkyl iodide (0.4 mmol) and amine (0.2 mmol) via microsyringe. Finally, another portion of DCM (2.0 mL) was added. The tube was subsequently put at the center of a stir plate and irradiated with blue LEDs. The reaction was stirred vigorously (700 rpm) with cooling by a fan. After 36 hours, the resulting mixture was extracted with DCM (3 x 15 mL) and the combined organic layers were dried over anhydrous Na<sub>2</sub>SO<sub>4</sub>. After

removal of the solvent under reduced pressure, the crude product was purified by column chromatography on silica gel to give the product **6c** to **6h**.

### (3) General Experimental Procedure C

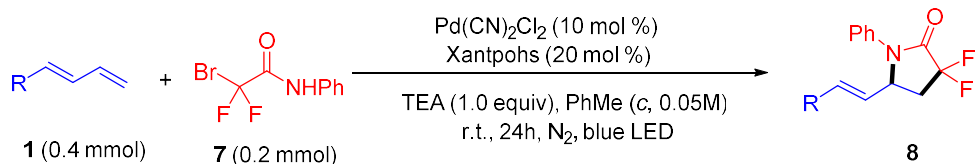

A 10 mL sealed tube (with a Teflon cap) equipped with a magnetic stir bar was charged with  $\text{Pd(CN)}_2\text{Cl}_2$  (0.02 mmol, 10 mol%), Xantphos (0.04 mmol, 20 mol%), **7** (0.2 mmol, 1.0 equiv), Then PhMe (2.0 mL) was added to the mixture, followed by 1,3-diene (0.4 mmol), TEA (0.2 mmol) via microsyringe. Finally, another portion of PhMe (2.0 mL) was added. The tube was subsequently put at the center of a stir plate and irradiated with blue LEDs. The reaction was stirred vigorously (700 rpm) with cooling by a fan. After 36 hours, the resulting mixture was extracted with DCM (3 x 15 mL) and the combined organic layers were dried over anhydrous  $\text{Na}_2\text{SO}_4$ . After removal of the solvent under reduced pressure, the crude product was purified by column chromatography on silica gel to give the product **8**.

### (4) Gram-scale Experiment Procedure for Gram Scale Synthesis of Product 4m

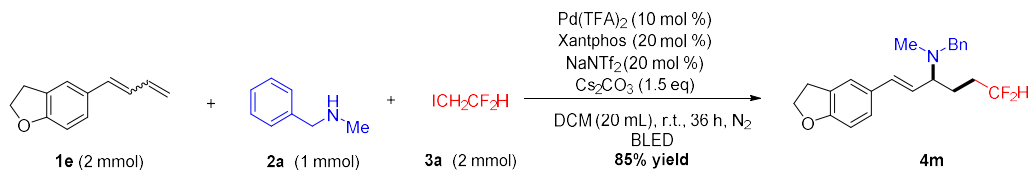

A 50 mL sealed tube (with a Teflon cap) equipped with a magnetic stir bar was charged with  $\text{Pd(TFA)}_2$  (0.1 mmol), Xantphos (0.2 mmol),  $\text{NaNTf}_2$  (0.2 mmol) and  $\text{Cs}_2\text{CO}_3$  (1.5 mmol). DCM (5.0 mL) was added to the mixture, followed by **1e** (2.0 mmol), **2a** (1 mmol) and **3a** (2 mmol) via microsyringe. Finally, the rest of DCM (15.0 mL) was added. The tube was subsequently put at the center of a stir plate and irradiated with blue LEDs. The reaction was stirred vigorously (700 rpm) with cooling by a fan. After 36 hours the reaction mixture was filtered through Celite and concentrated under reduced pressure. The crude reaction mixture was purified by flash column chromatography using EtOAc/Hexane (1:9) as the eluent to afford the pure **4m** with 85% yield.

## 5. Control Experiment

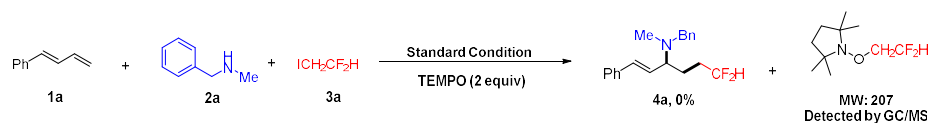

When TEMPO (2.0 equiv) was added to this reaction under standard condition, no desired product **4a** was found, while the 1-(2,2-difluoroethoxy)-2,2,5,5-tetramethylpyrrolidine was detected by GC/MS, indicating the possibility of the fluoroalkyl radical in the reaction medium.

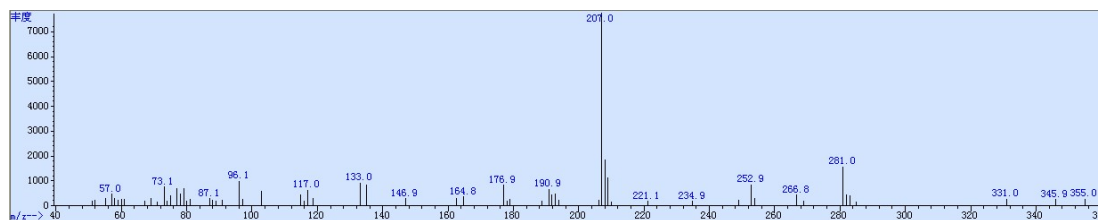

## 6. Characterization Data for New Products

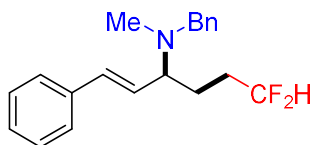

**(E)-N-Benzyl-6,6-difluoro-N-methyl-1-phenylhex-1-en-3-amine (4a).** Yellow oil, 80% yield, 50.5 mg. 81% yield, 50.9 mg when (*E*)/(*Z*)-1 was used. According to general experimental procedure A, the crude product was purified by column chromatography on silica gel (30:1 Hex/EtOAc to 20:1 Hex/EtOAc) to give the product **4a**.

$^1\text{H}$  NMR (600 MHz,  $\text{CDCl}_3$ )  $\delta$  7.44 - 7.32 (m, 8H), 7.31 - 7.26 (m, 2H), 6.48 (d,  $J$  = 15.9 Hz, 1H), 6.25 (dd,  $J$  = 15.9, 8.9 Hz, 1H), 5.87 (tt,  $J$  = 56.9, 4.1 Hz, 1H), 3.72 (d,  $J$  = 13.3 Hz, 1H), 3.52 (d,  $J$  = 13.3 Hz, 1H), 3.15- 7.19 (m, 1H), 2.26 (s, 3H), 2.10 - 1.90 (m, 3H), 1.71 - 1.75 (m,  $J$  = 10.4, 7.5 Hz, 1H).

$^{13}\text{C}$  NMR (151 MHz,  $\text{CDCl}_3$ )  $\delta$  139.69, 136.84, 133.33, 128.77, 128.65, 128.30, 127.67, 127.65, 126.93, 126.39, 117.45 (t,  $J$  = 238.7 Hz), 64.47, 58.48, 37.12, 31.27 (t,  $J$  = 21.0 Hz), 25.16 (t,  $J$  = 5.0 Hz).

$^{19}\text{F}$  NMR (565 MHz,  $\text{CDCl}_3$ )  $\delta$  -115.78.

HRMS(ESI) calcd. for  $\text{C}_{20}\text{H}_{24}\text{NF}_2^+[\text{M}+\text{H}]^+$  316.18713, found 316.18695.

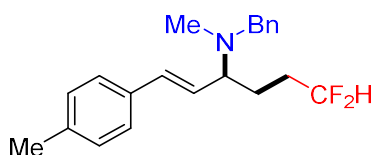

**(E)-N-Benzyl-6,6-difluoro-N-methyl-1-(*p*-tolyl)hex-1-en-3-amine (4b).** Pale yellow oil, 87% yield, 57.2 mg. According to general experimental procedure A, the crude product was purified by column chromatography on silica gel (30:1 Hex/EtOAc to 20:1 Hex/EtOAc) to give the product **4b**.

$^1\text{H}$  NMR (600 MHz,  $\text{CDCl}_3$ )  $\delta$  7.33 - 7.20 (m, 7H), 7.14 (d,  $J$  = 7.9 Hz, 2H), 6.41 (d,  $J$

= 15.9 Hz, 1H), 6.15 (dd,  $J = 15.9, 8.9$  Hz, 1H), 5.83 (tt,  $J = 56.9, 4.2$  Hz, 1H), 3.68 (d,  $J = 13.3$  Hz, 1H), 3.47 (d,  $J = 13.3$  Hz, 1H), 3.10 - 3.13 (m, 1H), 2.34 (s, 3H), 2.21 (s, 3H), 2.03 - 1.85 (m, 3H), 1.67 - 1.71 (m, 1H).

$^{13}\text{C}$  NMR (151 MHz,  $\text{CDCl}_3$ )  $\delta$  139.72, 137.55, 134.07, 133.28, 129.38, 128.83, 128.33, 126.96, 126.53, 126.33, 117.52 (t,  $J = 238.7$  Hz), 64.57, 58.47, 37.15, 31.32 (t,  $J = 20.8$  Hz), 25.23 (t,  $J = 4.9$  Hz), 21.24.

$^{19}\text{F}$  NMR (565 MHz,  $\text{CDCl}_3$ )  $\delta$  -115.71.

HRMS(ESI) calcd. for  $\text{C}_{21}\text{H}_{26}\text{NF}_2^+[\text{M}+\text{H}]^+$  330.20278, found 330.20239.

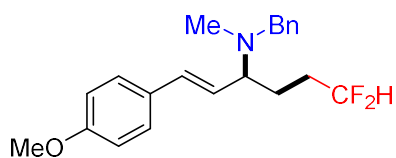

**(E)-N-Benzyl-6,6-difluoro-1-(4-methoxyphenyl)-N-methylhex-1-en-3-amine (4c).**

Pale yellow oil, 87% yield, 60.1 mg. According to general experimental procedure A, the crude product was purified by column chromatography on silica gel (20:1 Hex/EtOAc to 10:1 Hex/EtOAc) to give the product **4c**.

$^1\text{H}$  NMR (600 MHz,  $\text{CDCl}_3$ )  $\delta$  7.36 - 7.28 (m, 6H), 7.23 (dt,  $J = 9.4, 4.8$  Hz, 1H), 6.87 (d,  $J = 8.7$  Hz, 2H), 6.39 (d,  $J = 15.9$  Hz, 1H), 6.06 (dd,  $J = 15.9, 8.9$  Hz, 1H), 5.83 (tt,  $J = 56.8, 4.1$  Hz, 1H), 3.80 (s, 3H), 3.68 (d,  $J = 13.3$  Hz, 1H), 3.47 (d,  $J = 13.3$  Hz, 1H), 3.09 - 3.12 (m,  $J = 7.3$  Hz, 1H), 2.21 (s, 3H), 2.04 - 1.85 (m, 3H), 1.72 - 1.65 (m, 1H).

$^{13}\text{C}$  NMR (151 MHz,  $\text{CDCl}_3$ )  $\delta$  159.33, 139.76, 132.81, 129.66, 128.83, 128.32, 127.58, 126.94, 125.30, 117.54 (t,  $J = 238.7$  Hz), 114.10, 64.62, 58.45, 55.36, 37.14, 31.40 (d,  $J = 20.8$  Hz), 25.28 (t,  $J = 4.9$  Hz).



$^{19}\text{F}$  NMR (565 MHz,  $\text{CDCl}_3$ )  $\delta$  -115.70.

HRMS(ESI) calcd. for  $\text{C}_{21}\text{H}_{26}\text{ONF}_2^+[\text{M}+\text{H}]^+$  346.19769, found 346.19733.

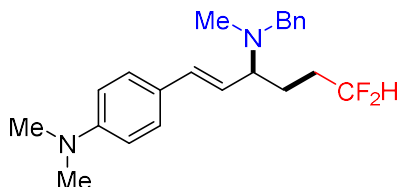

**(E)-4-(3-(benzyl(methyl)amino)-6,6-difluorohex-1-en-1-yl)-N,N-dimethylaniline (4d)**. Red brown oil, 47% yield, 33.9 mg. According to general experimental procedure A, the crude product was purified by column chromatography on silica gel (20:1 Hex/EtOAc to 10:1 Hex/EtOAc) to give the product **4d**.

$^1\text{H}$  NMR (600 MHz,  $\text{CDCl}_3$ )  $\delta$  7.38 – 7.27 (m, 7H), 6.74 (d,  $J$  = 8.8 Hz, 2H), 6.41 (d,  $J$  = 15.8 Hz, 1H), 6.03 (dd,  $J$  = 15.8, 8.9 Hz, 1H), 5.88 (tt,  $J$  = 56.9, 4.2 Hz, 1H), 3.73 (d,  $J$  = 13.3 Hz, 1H), 3.53 (d,  $J$  = 13.3 Hz, 1H), 3.11 - 3.16 (m, 1H), 3.00 (s, 6H), 2.25 (s, 3H), 2.08 - 1.91 (m, 3H), 1.78 - 1.70 (m, 1H).

$^{13}\text{C}$  NMR (151 MHz,  $\text{CDCl}_3$ )  $\delta$  150.25, 139.79, 133.38, 128.88, 128.29, 127.33, 126.89, 125.32, 122.88, 117.58 (t,  $J$  = 238.7 Hz), 112.53, 64.86, 58.40, 40.59, 37.17, 31.40 (t,  $J$  = 20.8 Hz), 25.44 (t,  $J$  = 4.9 Hz).

$^{19}\text{F}$  NMR (565 MHz,  $\text{CDCl}_3$ )  $\delta$  -115.67.

HRMS(ESI) calcd. for  $\text{C}_{22}\text{H}_{29}\text{N}_2\text{F}_2^+[\text{M}+\text{H}]^+$  359.22933, found 359.22913.

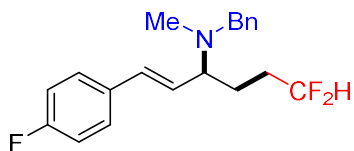

**(E)-N-benzyl-6,6-difluoro-1-(4-fluorophenyl)-N-methylhex-1-en-3-amine (4e)**. Red brown oil, 65% yield, 43.4 mg. According to general experimental procedure A, the crude product was purified by column chromatography on silica gel (30:1 Hex/EtOAc to 20:1 Hex/EtOAc) to give the product **4e**.

$^1\text{H}$  NMR (600 MHz,  $\text{CDCl}_3$ )  $\delta$  7.39 - 7.20 (m, 7H), 7.02 (t,  $J = 8.6$  Hz, 2H), 6.41 (d,  $J = 15.9$  Hz, 1H), 6.12 (dd,  $J = 15.9, 8.8$  Hz, 1H), 5.84 (tt,  $J = 56.9, 3.8$  Hz, 1H), 3.69 (d,  $J = 13.3$  Hz, 1H), 3.48 (d,  $J = 13.3$  Hz, 1H), 3.11 - 3.15 (m,  $J = 7.4$  Hz, 1H), 2.22 (s, 3H), 2.05 - 1.65 (m, 4H).

$^{13}\text{C}$  NMR (151 MHz,  $\text{CDCl}_3$ )  $\delta$  162.35(d,  $J = 246.1$  Hz), 139.58, 132.98 (d,  $J = 3.3$  Hz), 132.17, 128.78, 128.35, 127.90 (d,  $J = 7.7$  Hz), 127.36, 127.00, 117.44 (t,  $J = 238.7$  Hz), 115.55 (d,  $J = 21.0$  Hz), 64.42, 58.46, 37.10, 31.25 (t,  $J = 21.2$  Hz), 25.09 (t,  $J = 4.9$  Hz).

$^{19}\text{F}$  NMR (565 MHz,  $\text{CDCl}_3$ )  $\delta$  -114.35, -115.79.

HRMS(ESI) calcd. for  $\text{C}_{20}\text{H}_{23}\text{NF}_3$ [ $\text{M}+\text{H}$ ] $^+$  334.17771, found 334.17725.

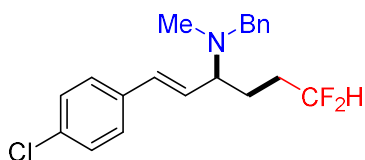

**(E)-N-Benzyl-1-(4-chlorophenyl)-6,6-difluoro-N-methylhex-1-en-3-amine (4f).**

Pale yellow oil. 73% yield, 51.1 mg. According to general experimental procedure A, the crude product was purified by column chromatography on silica gel (30:1 Hex/EtOAc to 20:1 Hex/EtOAc) to give the product **4f**.

$^1\text{H}$  NMR (600 MHz,  $\text{CDCl}_3$ )  $\delta$  7.35 - 7.22 (m, 9H), 6.40 (d,  $J = 15.9$  Hz, 1H), 6.19 (dd,  $J = 15.9, 8.8$  Hz, 1H), 5.84 (tt,  $J = 56.9, 4.1$  Hz, 1H), 3.68 (d,  $J = 13.3$  Hz, 1H), 3.48 (d,  $J = 13.3$  Hz, 1H), 3.11 - 3.15 (m, 1H), 2.22 (s, 3H), 2.05 - 1.85 (m, 3H), 1.74 - 1.64 (m, 1H).

$^{13}\text{C}$  NMR (151 MHz,  $\text{CDCl}_3$ )  $\delta$  139.55, 135.30, 133.28, 132.10, 128.80, 128.77, 128.43, 128.36, 127.61, 127.02, 117.41 (t,  $J = 238.7$  Hz), 64.36, 58.48, 37.09, 31.22 (t,  $J = 21.2$  Hz), 25.01 (t,  $J = 5.2$  Hz).

$^{19}\text{F}$  NMR (565 MHz,  $\text{CDCl}_3$ )  $\delta$  -115.79.

HRMS(ESI) calcd. for  $C_{20}H_{23}NCIF_2[M+H]^+$  350.14816, found 350.14786.

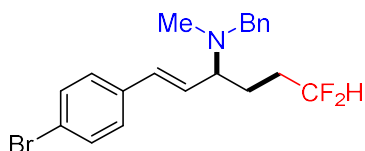

**(E)-N-Benzyl-1-(4-bromophenyl)-6,6-difluoro-N-methylhex-1-en-3-amine (4g).**

Yellow oil, 20% yield, 15.2 mg. According to general experimental procedure A, the crude product was purified by column chromatography on silica gel (30:1 Hex/EtOAc to 20:1 Hex/EtOAc) to give the product **4g**.

$^1H$  NMR (600 MHz,  $CDCl_3$ )  $\delta$  7.45 (d,  $J = 8.4$  Hz, 2H), 7.33 - 7.23 (m, 7H), 6.39 (d,  $J = 15.9$  Hz, 1H), 6.21 (dd,  $J = 15.9, 8.8$  Hz, 1H), 5.84 (tt,  $J = 56.9, 4.0$  Hz, 1H), 3.68 (d,  $J = 13.3$  Hz, 1H), 3.48 (d,  $J = 13.3$  Hz, 1H), 3.11 - 3.15 (m, 1H), 2.22 (s, 3H), 2.05 - 1.87 (m, 3H), 1.71 - 1.66 (m, 1H).

$^{13}C$  NMR (151 MHz,  $CDCl_3$ )  $\delta$  139.54, 135.72, 132.13, 131.74, 128.75, 128.59, 128.34, 127.92, 127.00, 121.39, 117.39 (t,  $J = 238.8$  Hz), 64.34, 58.47, 37.09, 31.20 (t,  $J = 21.0$  Hz), 24.97 (t,  $J = 5.0$  Hz).

$^{19}F$  NMR (565 MHz,  $CDCl_3$ )  $\delta$  -115.86.

HRMS(ESI) calcd. for  $C_{20}H_{23}NBrF_2[M+H]^+$  394.09765, found 394.09769.

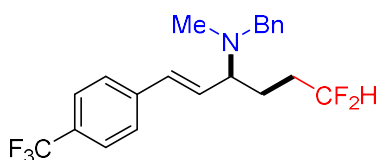

**(E)-N-Benzyl-6,6-difluoro-N-methyl-1-(4-(trifluoromethyl)phenyl)hex-1-en-3-amine (4h).** Brown oil, 67% yield, 51.3 mg. According to general experimental procedure A, the crude product was purified by column chromatography on silica gel (30:1 Hex/EtOAc to 20:1 Hex/EtOAc) to give the product **4h**.

$^1\text{H}$  NMR (600 MHz,  $\text{CDCl}_3$ )  $\delta$  7.58 (d,  $J = 8.1$  Hz, 2H), 7.48 (d,  $J = 8.1$  Hz, 2H), 7.36 - 7.21 (m, 5H), 6.49 (d,  $J = 15.2$  Hz, 1H), 6.33 (dd,  $J = 15.9, 8.7$  Hz, 1H), 5.96 - 5.74 (m, 1H), 3.70 (d,  $J = 13.3$  Hz, 1H), 3.50 (d,  $J = 13.3$  Hz, 1H), 3.16 - 3.20 (m, 1H), 2.24 (s, 3H), 1.89 - 1.96 (m, 3H), 1.75 - 1.68 (m, 1H).

$^{13}\text{C}$  NMR (151 MHz,  $\text{CDCl}_3$ )  $\delta$  140.23, 139.40, 132.02, 130.59, 129.48 (d,  $J = 32.5$  Hz), 128.76, 128.38, 127.08, 126.56, 125.62 (q,  $J = 3.9$  Hz), 117.35 (t,  $J = 238.7$  Hz), 64.26, 58.51, 37.05, 31.16 (t,  $J = 20.9$  Hz), 24.87 (t,  $J = 4.9$  Hz).

$^{19}\text{F}$  NMR (565 MHz,  $\text{CDCl}_3$ )  $\delta$  -62.45, -115.88.

HRMS(ESI) calcd. for  $\text{C}_{21}\text{H}_{23}\text{NF}_5^+[\text{M}+\text{H}]^+$  384.17452, found 384.17438.

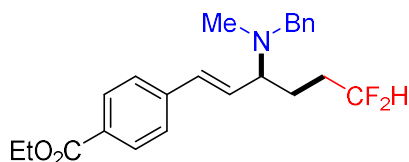

**Methyl (*E*)-4-(3-(benzyl(methyl)amino)-6,6-difluorohex-1-en-1-yl) benzoate (4i).**

Brown oil, 57% yield, 42.7 mg. According to general experimental procedure A, the crude product was purified by column chromatography on silica gel (20:1 Hex/EtOAc to 10:1 Hex/EtOAc) to give the product **4i**.

$^1\text{H}$  NMR (600 MHz,  $\text{CDCl}_3$ )  $\delta$  8.01 (d,  $J = 8.4$  Hz, 2H), 7.44 (d,  $J = 8.2$  Hz, 2H), 7.32 (d,  $J = 4.9$  Hz, 4H), 7.27 - 7.23 (m, 1H), 6.49 (d,  $J = 15.9$  Hz, 1H), 6.34 (dd,  $J = 15.9, 8.7$  Hz, 1H), 5.85 (tt,  $J = 57.0, 4.1$  Hz, 1H), 4.38 (q,  $J = 7.1$  Hz, 2H), 3.70 (d,  $J = 13.3$  Hz, 1H), 3.50 (d,  $J = 13.3$  Hz, 1H), 3.15 - 3.19 (m, 1H), 2.24 (s, 3H), 2.09 - 1.88 (m, 3H), 1.74 - 1.68 (m, 1H), 1.40 (t,  $J = 7.1$  Hz, 3H).

$^{13}\text{C}$  NMR (151 MHz,  $\text{CDCl}_3$ )  $\delta$  166.39, 141.10, 139.49, 132.44, 130.57, 129.98, 129.47, 128.74, 128.35, 127.02, 126.22, 117.36 (t,  $J = 238.7$  Hz), 64.33, 60.98, 58.50, 37.08, 31.18 (t,  $J = 20.8$  Hz), 24.90 (t,  $J = 4.9$  Hz), 14.37.

$^{19}\text{F}$  NMR (565 MHz,  $\text{CDCl}_3$ )  $\delta$  -115.86.

HRMS(ESI) calcd. for  $C_{23}H_{28}O_2NF_2[M+H]^+$  388.20826, found 388.20798.

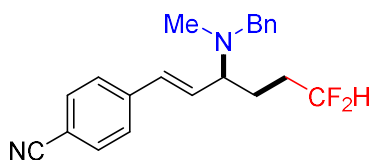

**(E)-4-(3-(Benzyl(methyl)amino)-6,6-difluorohex-1-en-1-yl) benzonitrile (4j).**

Yellow oil, 48% yield, 32.6 mg. According to general experimental procedure A, the crude product was purified by column chromatography on silica gel (20:1 Hex/EtOAc to 10:1 Hex/EtOAc) to give the product **4j**.

$^1H$  NMR (600 MHz,  $CDCl_3$ )  $\delta$  7.61 (d,  $J = 8.4$  Hz, 2H), 7.47 (d,  $J = 8.3$  Hz, 2H), 7.35 - 7.22 (m, 5H), 6.47 (d,  $J = 16.0$  Hz, 1H), 6.37 (dd,  $J = 16.0, 8.6$  Hz, 1H), 5.86 (tt,  $J = 57.1, 4.1$  Hz, 1H), 3.70 (d,  $J = 13.3$  Hz, 1H), 3.49 (d,  $J = 13.3$  Hz, 1H), 3.16 - 3.20 (m, 1H), 2.24 (s, 3H), 2.06 - 1.84 (m, 3H), 1.74 - 1.67 (m, 1H).

$^{13}C$  NMR (151 MHz,  $CDCl_3$ )  $\delta$  141.18, 139.33, 132.49, 132.15, 131.65, 128.70, 128.38, 127.09, 126.88, 118.94, 117.28 (t,  $J = 238.7$  Hz), 110.88, 64.14, 58.52, 37.04, 31.10 (t,  $J = 20.9$  Hz), 24.74 (t,  $J = 5.3$  Hz).

$^{19}F$  NMR (565 MHz,  $CDCl_3$ )  $\delta$  -115.93 (d,  $J = 6.5$  Hz).

HRMS(ESI) calcd. for  $C_{21}H_{23}N_2F_2[M+H]^+$  341.18238, found 341.18213.

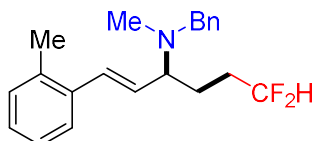

**(E)-N-Benzyl-6,6-difluoro-N-methyl-1-(o-tolyl)hex-1-en-3-amine (4k).** Brown oil. 62% yield, 40.5 mg. According to general experimental procedure A, the crude product was purified by column chromatography on silica gel (30:1 Hex/EtOAc to 20:1 Hex/EtOAc) to give the product **4k**.

$^1H$  NMR (600 MHz,  $CDCl_3$ )  $\delta$  7.45 - 7.16 (m, 9H), 6.64 (d,  $J = 15.8$  Hz, 1H), 6.05

(dd,  $J = 15.8, 8.9$  Hz, 1H), 5.85 (tt,  $J = 57.0, 4.0$  Hz, 1H), 3.71 (d,  $J = 13.3$  Hz, 1H), 3.50 (d,  $J = 13.3$  Hz, 1H), 3.14 - 3.17 (m, 1H), 2.36 (s, 3H), 2.24 (s, 3H), 2.06 - 1.88 (m, 3H), 1.76 - 1.67 (m, 1H).

$^{13}\text{C}$  NMR (151 MHz,  $\text{CDCl}_3$ )  $\delta$  139.59, 136.18, 135.35, 131.53, 130.39, 128.85, 128.36, 127.63, 127.02, 126.20, 125.85, 117.49 (t,  $J = 238.7$  Hz), 64.52, 58.46, 37.13, 31.31 (t,  $J = 21.2$  Hz), 25.21 (t,  $J = 4.9$  Hz), 19.97.

$^{19}\text{F}$  NMR (565 MHz,  $\text{CDCl}_3$ )  $\delta$  -115.72.

HRMS(ESI) calcd. for  $\text{C}_{21}\text{H}_{26}\text{NF}_2[\text{M}+\text{H}]^+$  330.20278, found 330.20258.

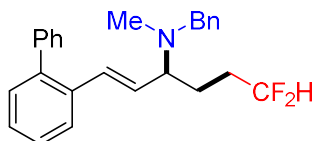

**(E)-1-([1,1'-Biphenyl]-2-yl)-N-benzyl-6,6-difluoro-N-methylhex-1-en-3-amine (4l).**

Brown oil, 57% yield, 44.6 mg. According to general experimental procedure A, the crude product was purified by column chromatography on silica gel (30:1 Hex/EtOAc to 20:1 Hex/EtOAc) to give the product **4l**.

$^1\text{H}$  NMR (600 MHz,  $\text{CDCl}_3$ )  $\delta$  7.59 (d,  $J = 7.2$  Hz, 1H), 7.46 – 7.18 (m, 13H), 6.43 (d,  $J = 15.9$  Hz, 1H), 6.11 (dd,  $J = 15.9, 8.9$  Hz, 1H), 5.79 (tt,  $J = 57.1, 4.0$  Hz, 1H), 3.65 (d,  $J = 13.3$  Hz, 1H), 3.42 (d,  $J = 13.3$  Hz, 1H), 2.98 - 3.01 (m, 1H), 2.20 (s, 3H), 1.97 - 1.59 (m, 4H).

$^{13}\text{C}$  NMR (151 MHz,  $\text{CDCl}_3$ )  $\delta$  141.02, 140.84, 139.53, 135.12, 132.75, 130.26, 129.79, 128.84, 128.31, 128.18, 127.58, 127.18, 126.96, 126.30, 117.43 (t,  $J = 238.7$  Hz), 64.28, 58.53, 37.11, 31.27 (t,  $J = 21.1$  Hz), 25.16 (t,  $J = 5.0$  Hz).

$^{19}\text{F}$  NMR (565 MHz,  $\text{CDCl}_3$ )  $\delta$  -115.74.

HRMS(ESI) calcd. for  $\text{C}_{26}\text{H}_{28}\text{NF}_2[\text{M}+\text{H}]^+$  392.21843, found 392.21838.

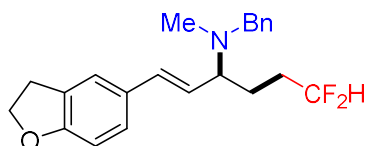

**(E)-N-Benzyl-1-(2,3-dihydrobenzofuran-5-yl)-6,6-difluoro-N-methylhex-1-en-3-amine (4m).** Yellow oil, 82% yield, 58.5 mg. According to general experimental procedure A, the crude product was purified by column chromatography on silica gel (9:1 Hex/EtOAc) to give the product **4m**.

$^1\text{H}$  NMR (600 MHz,  $\text{CDCl}_3$ )  $\delta$  7.35 - 7.21 (m, 6H), 7.13 (d,  $J = 8.2$  Hz, 1H), 6.75 (d,  $J = 8.1$  Hz, 1H), 6.38 (d,  $J = 15.8$  Hz, 1H), 6.03 (dd,  $J = 15.8, 8.9$  Hz, 1H), 5.84 (tt,  $J = 56.8, 3.8$  Hz, 1H), 4.58 (t,  $J = 8.6$  Hz, 2H), 3.69 (d,  $J = 13.3$  Hz, 1H), 3.48 (d,  $J = 13.3$  Hz, 1H), 3.21 (t,  $J = 8.6$  Hz, 2H), 3.08 - 3.12 (m, 1H), 2.21 (s, 3H), 2.03 - 1.85 (m, 3H), 1.66 - 1.71 (m, 1H).

$^{13}\text{C}$  NMR (151 MHz,  $\text{CDCl}_3$ )  $\delta$  159.95, 139.82, 133.19, 129.71, 128.81, 128.31, 127.60, 126.92, 126.88, 124.65, 122.60, 117.55 (t,  $J = 238.7$  Hz), 109.31, 71.49, 64.64, 58.45, 37.16, 31.34 (t,  $J = 20.8$  Hz), 29.65, 25.35 (t,  $J = 5.1$  Hz).

$^{19}\text{F}$  NMR (565 MHz,  $\text{CDCl}_3$ )  $\delta$  -115.69.

HRMS(ESI) calcd. for  $\text{C}_{22}\text{H}_{26}\text{ONF}_2[\text{M}+\text{H}]^+$  358.19769, found 358.19708.

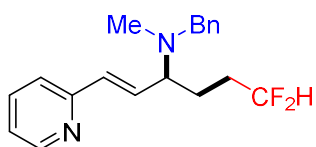

**(E)-N-Benzyl-6,6-difluoro-N-methyl-1-(pyridin-2-yl)hex-1-en-3-amine (4n).**

Yellow oil. 46% yield, 29.2 mg. According to general experimental procedure A, the crude product was purified by column chromatography on silica gel (10:1 Hex/EtOAc to 5:1 Hex/EtOAc) to give the product **4n**.

$^1\text{H}$  NMR (600 MHz,  $\text{CDCl}_3$ )  $\delta$  8.58 (d,  $J = 4.6$  Hz, 1H), 7.64 (t,  $J = 7.7$  Hz, 1H), 7.36 - 7.13 (m, 7H), 6.77 (dd,  $J = 15.7, 8.9$  Hz, 1H), 6.55 (d,  $J = 15.7$  Hz, 1H), 5.84 (tt,  $J = 57.1, 3.9$  Hz, 1H), 3.73 (d,  $J = 13.4$  Hz, 1H), 3.53 (d,  $J = 13.4$  Hz, 1H), 3.20 - 3.24 (m, 1H), 2.25 (s, 3H), 2.05 - 1.70 (m, 4H).

$^{13}\text{C}$  NMR (151 MHz,  $\text{CDCl}_3$ )  $\delta$  154.97, 149.64, 139.59, 136.60, 133.13, 132.28, 128.75, 128.31, 126.96, 122.28, 121.73, 117.42 (t,  $J = 239.0$  Hz), 64.08, 58.41, 37.06, 31.20 (t,  $J = 20.8$  Hz), 24.90 (t,  $J = 5.0$  Hz).

$^{19}\text{F}$  NMR (565 MHz,  $\text{CDCl}_3$ )  $\delta$  -115.80.

HRMS(ESI) calcd. for  $\text{C}_{19}\text{H}_{23}\text{N}_2\text{F}_2[\text{M}+\text{H}]^+$  317.18238, found 317.18201.

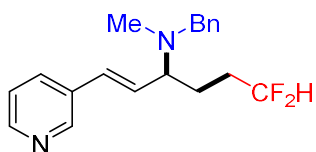

**(E)-N-Benzyl-6,6-difluoro-N-methyl-1-(pyridin-3-yl)hex-1-en-3-amine (4o).** Red brown oil, 40% yield, 25.1 mg. According to general experimental procedure A, the crude product was purified by column chromatography on silica gel (10:1 Hex/EtOAc to 5:1 Hex/EtOAc) to give the product **4o**.

$^1\text{H}$  NMR (600 MHz,  $\text{CDCl}_3$ )  $\delta$  8.66 - 8.45 (m, 2H), 7.71 (d,  $J = 7.9$  Hz, 1H), 7.36 - 7.21 (m, 6H), 6.45 (d,  $J = 16.0$  Hz, 1H), 6.30 (dd,  $J = 16.0, 8.7$  Hz, 1H), 5.86 (tt,  $J = 57.1, 4.1$  Hz, 1H), 3.70 (d,  $J = 13.3$  Hz, 1H), 3.50 (d,  $J = 13.3$  Hz, 1H), 3.20 - 3.16 (m, 1H), 2.24 (s, 3H), 2.06 - 1.88 (m, 3H), 1.75 - 1.67 (m, 1H).

$^{13}\text{C}$  NMR (151 MHz,  $\text{CDCl}_3$ )  $\delta$  148.70, 148.29, 139.38, 132.85, 132.38, 130.25, 129.73, 128.72, 128.36, 127.05, 123.51, 117.32 (t,  $J = 238.7$  Hz), 64.30, 58.49, 37.05, 31.15 (t,  $J = 20.8$  Hz), 24.84 (t,  $J = 5.2$  Hz).

$^{19}\text{F}$  NMR (565 MHz,  $\text{CDCl}_3$ )  $\delta$  -115.90 (d,  $J = 3.7$  Hz).

HRMS(ESI) calcd. for  $\text{C}_{19}\text{H}_{23}\text{N}_2\text{F}_2[\text{M}+\text{H}]^+$  317.18238, found 317.18231.

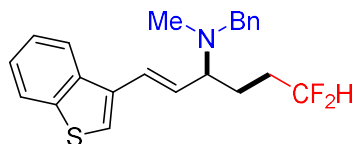

**(E)-1-(Benzo[b]thiophen-3-yl)-N-benzyl-6,6-difluoro-N-methylhex-1-en-3-amine**



(**4p**). Red brown oil, 89% yield, 67.1 mg. According to general experimental procedure A, the crude product was purified by column chromatography on silica gel (20:1 Hex/EtOAc to 10:1 Hex/EtOAc) to give the product **4p**.

$^1\text{H}$  NMR (600 MHz,  $\text{CDCl}_3$ )  $\delta$  7.87 (dd,  $J = 21.1, 7.7$  Hz, 2H), 7.45 - 7.18 (m, 8H), 6.69 (d,  $J = 15.9$  Hz, 1H), 6.24 (dd,  $J = 15.9, 8.9$  Hz, 1H), 5.86 (tt,  $J = 56.8, 4.1$  Hz, 1H), 3.72 (d,  $J = 13.4$  Hz, 1H), 3.52 (d,  $J = 13.4$  Hz, 1H), 3.20- 3.16 (m, 1H), 2.26 (s, 3H), 2.08 - 1.89 (m, 3H), 1.75 - 1.71 (m, 1H).

$^{13}\text{C}$  NMR (151 MHz,  $\text{CDCl}_3$ )  $\delta$  140.58, 139.64, 137.72, 133.67, 129.43, 128.86, 128.41, 127.06, 125.66, 124.62, 124.43, 123.05, 122.14, 121.99, 117.50 (t,  $J = 238.7$  Hz), 64.67, 58.56, 37.17, 31.39 (d,  $J = 20.8$  Hz), 25.16 (t,  $J = 5.2$  Hz).

$^{19}\text{F}$  NMR (565 MHz,  $\text{CDCl}_3$ )  $\delta$  -115.66.

HRMS(ESI) calcd. for  $\text{C}_{22}\text{H}_{24}\text{NF}_2\text{S}[\text{M}+\text{H}]^+$  372.15920, found 372.15903.

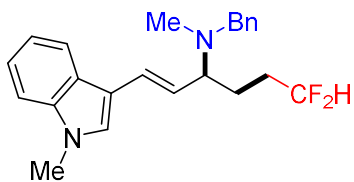

(*E*)-*N*-Benzyl-6,6-difluoro-*N*-methyl-1-(1-methyl-1*H*-indol-3-yl)hex-1-en-3-amine

(**4q**). Yellow oil. 64% yield, 47.4 mg. According to general experimental procedure A, the crude product was purified by column chromatography on silica gel (20:1 Hex/EtOAc to 10:1 Hex/EtOAc) to give the product **4q**.

$^1\text{H}$  NMR (600 MHz,  $\text{CDCl}_3$ )  $\delta$  7.84 (d,  $J = 7.9$  Hz, 1H), 7.37 - 7.16 (m, 9H), 7.09 (s, 1H), 6.59 (d,  $J = 16.0$  Hz, 1H), 6.10 (dd,  $J = 16.0, 8.9$  Hz, 1H), 5.85 (tt,  $J = 56.9, 4.2$  Hz, 1H), 3.75 (s, 3H), 3.72 (d,  $J = 13.4$  Hz, 1H), 3.52 (d,  $J = 13.3$  Hz, 1H), 3.14 - 3.11 (m, 1H), 2.25 (s, 3H), 2.05 - 1.90 (m, 3H), 1.76 - 1.71 (m, 1H).

$^{13}\text{C}$  NMR (151 MHz,  $\text{CDCl}_3$ )  $\delta$  139.85, 137.64, 128.93, 128.32, 128.13, 126.92,

126.10, 126.05, 123.26, 122.26, 120.14, 120.03, 117.65 (t,  $J = 238.7$  Hz), 113.22, 109.62, 65.53, 58.48, 37.21, 32.83, 31.48 (t,  $J = 21.1$  Hz), 25.63 (t,  $J = 4.9$  Hz).

$^{19}\text{F}$  NMR (565 MHz,  $\text{CDCl}_3$ )  $\delta$  -115.59.

HRMS(ESI) calcd. for  $\text{C}_{23}\text{H}_{27}\text{N}_2\text{F}_2[\text{M}+\text{H}]^+$  369.21338, found 369.21368.

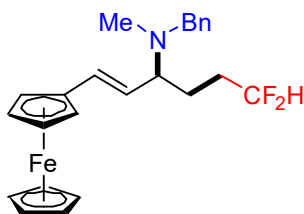

**(E)-N-Benzyl-6,6-difluoro-N-methyl-1-ferrocenylpent-1-en-3-amine (4r)**. Red brown oil. 32% yield, 27.1 mg. According to general experimental procedure A, the crude product was purified by column chromatography on silica gel (30:1 Hex/EtOAc to 20:1 Hex/EtOAc) to give the product **4r**.

$^1\text{H}$  NMR (600 MHz,  $\text{CDCl}_3$ )  $\delta$  7.28 (dd,  $J = 48.6, 4.4$  Hz, 5H), 6.19 (d,  $J = 15.8$  Hz, 1H), 5.97 - 5.72 (m, 2H), 4.35 (d,  $J = 11.9$  Hz, 2H), 4.22 (s, 2H), 4.11 (s, 4H), 3.68 (d,  $J = 13.3$  Hz, 1H), 3.48 (d,  $J = 13.3$  Hz, 1H), 3.04 - 3.00 (m, 1H), 2.20 (s, 3H), 2.04 - 1.83 (m, 3H), 1.69 - 1.59 (m, 1H).

$^{13}\text{C}$  NMR (151 MHz,  $\text{CDCl}_3$ )  $\delta$  139.70, 131.01, 128.79, 128.33, 126.95, 124.38, 117.50 (t,  $J = 238.7$  Hz), 82.86, 69.18, 68.77, 68.75, 66.82, 66.68, 64.70, 58.43, 37.21, 31.36 (t,  $J = 20.8$  Hz), 25.19 (t,  $J = 4.9$  Hz).

$^{19}\text{F}$  NMR (565 MHz,  $\text{CDCl}_3$ )  $\delta$  -115.68.

HRMS(ESI) calcd. for  $\text{C}_{24}\text{H}_{27}\text{NF}_2\text{Fe}[\text{M}]^+$  423.14555, found 423.14505.

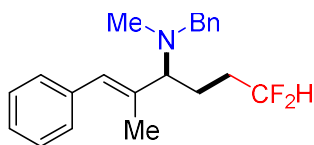

**(E)-N-Benzyl-6,6-difluoro-N,2-dimethyl-1-phenylhex-1-en-3-amine (4s).** Pale yellow oil, 46% yield, 30.3 mg. According to general experimental procedure A, the crude product was purified by column chromatography on silica gel (30:1 Hex/EtOAc to 20:1 Hex/EtOAc) to give the product **4s**.

$^1\text{H}$  NMR (600 MHz,  $\text{CDCl}_3$ )  $\delta$  7.35 - 7.20 (m, 10H), 6.41 (s, 1H), 5.85 (tt,  $J = 56.9$ , 4.3 Hz, 1H), 3.77 (d,  $J = 13.5$  Hz, 1H), 3.37 (d,  $J = 13.5$  Hz, 1H), 2.90 (dd,  $J = 9.5$ , 5.1 Hz, 1H), 2.18 (s, 3H), 2.03 - 1.96 (m, 1H), 1.92 (d,  $J = 1.3$  Hz, 3H), 1.89 - 1.81 (m, 2H), 1.74 - 1.71 (m, 1H).

$^{13}\text{C}$  NMR (151 MHz,  $\text{CDCl}_3$ )  $\delta$  140.05, 137.77, 137.55, 129.02, 128.67, 128.28, 128.20, 126.83, 126.53, 117.34 (t,  $J = 238.8$  Hz), 72.42, 59.22, 38.79, 31.78 (d,  $J = 20.8$  Hz), 22.27 (d,  $J = 4.7$  Hz), 14.85.

$^{19}\text{F}$  NMR (565 MHz,  $\text{CDCl}_3$ )  $\delta$  -115.78 (d,  $J = 42.9$  Hz).

HRMS(ESI) calcd. for  $\text{C}_{21}\text{H}_{26}\text{NF}_2[\text{M}+\text{H}]^+$  330.20278, found 330.20248.

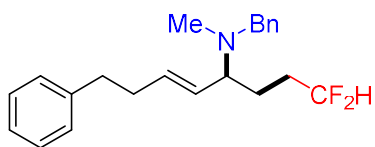

**(E)-N-Benzyl-1,1-difluoro-N-methyl-8-phenyloct-5-en-4-amine (4t).** Red brown oil. 69% yield, 47.3 mg. According to general experimental procedure A, the crude product was purified by column chromatography on silica gel (30:1 Hex/EtOAc to 20:1 Hex/EtOAc) to give the product **4t**.

$^1\text{H}$  NMR (600 MHz,  $\text{CDCl}_3$ )  $\delta$  7.45 - 7.05 (m, 10H), 5.83 (tt,  $J = 56.8$ , 4.5 Hz, 1H), 5.51 (t,  $J = 5.6$  Hz, 2H), 3.65 (d,  $J = 13.2$  Hz, 1H), 3.39 (d,  $J = 13.3$  Hz, 1H), 3.01 - 2.97 (m, 1H), 2.71 - 2.60 (m, 2H), 2.28 - 2.25 (m, 2H), 2.15 (s, 3H), 2.03 - 1.89 (m, 3H), 1.76 - 1.74 (m, 1H).

$^{13}\text{C}$  NMR (151 MHz,  $\text{CDCl}_3$ )  $\delta$  142.55, 139.91, 131.54, 129.71, 128.83, 128.48, 128.35, 128.26, 126.83, 125.73, 117.00 (t,  $J = 239.2$  Hz), 64.60, 58.04, 37.46, 34.48, 33.99 (t,  $J = 20.8$  Hz), 32.79, 25.36 (t,  $J = 6.0$  Hz).

$^{19}\text{F}$  NMR (565 MHz,  $\text{CDCl}_3$ )  $\delta$  -116.34.

HRMS(ESI) calcd. for  $\text{C}_{22}\text{H}_{28}\text{NF}_2^+[\text{M}+\text{H}]$  344.21843, found 344.21832.

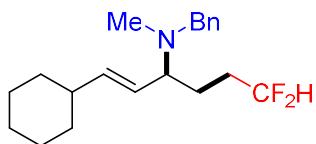

**(*E*)-*N*-Benzyl-1-cyclohexyl-6,6-difluoro-*N*-methylhex-1-en-3-amine (4u).** Brown oil, 70% yield, 44.7 mg. According to general experimental procedure A, the crude product was purified by column chromatography on silica gel (30:1 Hex/EtOAc to 20:1 Hex/EtOAc) to give the product **4u**.

$^1\text{H}$  NMR (600 MHz,  $\text{CDCl}_3$ )  $\delta$  7.33 - 7.21 (m, 5H), 5.81 (tt,  $J = 57.0, 4.4$  Hz, 1H), 5.46 (dd,  $J = 15.5, 6.7$  Hz, 1H), 5.32 (dd,  $J = 15.5, 8.8$  Hz, 1H), 3.61 (d,  $J = 13.3$  Hz, 1H), 3.38 (d,  $J = 13.3$  Hz, 1H), 2.91 - 2.87 (m, 1H), 2.13 (s, 3H), 2.01 - 1.55 (m, 10H), 1.32 - 1.08 (m, 5H).

$^{13}\text{C}$  NMR (151 MHz,  $\text{CDCl}_3$ )  $\delta$  141.09, 139.80, 128.85, 128.24, 126.84, 124.17, 117.59 (t,  $J = 238.7$  Hz), 64.28, 58.22, 40.82, 37.08, 33.38, 33.23, 31.36 (t,  $J = 20.8$  Hz), 26.19, 25.23 (t,  $J = 5.2$  Hz).

$^{19}\text{F}$  NMR (565 MHz,  $\text{CDCl}_3$ )  $\delta$  -115.69.

HRMS(ESI) calcd. for  $\text{C}_{20}\text{H}_{30}\text{NF}_2[\text{M}+\text{H}]^+$  322.23408, found 322.23401.

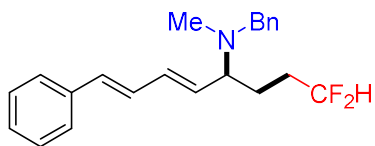

**(*5E,7E*)-*N*-Benzyl-1,1-difluoro-*N*-methyl-8-phenylocta-5,7-dien-4-amine (4v).** Yellow oil, 50% yield, 34.1 mg. According to general experimental procedure A, the crude product was purified by column chromatography on silica gel (30:1 Hex/EtOAc to 20:1 Hex/EtOAc) to give the product **4v**.

$^1\text{H}$  NMR (600 MHz,  $\text{CDCl}_3$ )  $\delta$  7.42 - 7.21 (m, 11H), 6.79 (dd,  $J = 15.6, 10.4$  Hz, 1H),

6.55 (d,  $J = 15.7$  Hz, 1H), 6.27 (dd,  $J = 15.2, 10.5$  Hz, 1H), 5.94 - 5.72 (m, 2H), 3.66 (d,  $J = 13.3$  Hz, 1H), 3.45 (d,  $J = 13.3$  Hz, 1H), 3.09 - .05 (m, 1H), 2.19 (s, 3H), 2.00 - 1.83 (m, 3H), 1.69 - 1.61 (m, 1H).

$^{13}\text{C}$  NMR (151 MHz,  $\text{CDCl}_3$ )  $\delta$  139.62, 137.21, 133.85, 132.31, 131.89, 128.80, 128.67, 128.36, 128.31, 127.61, 126.96, 126.36, 117.45 (t,  $J = 238.7$  Hz), 64.16, 58.44, 37.02, 31.25 (t,  $J = 21.1$  Hz), 25.00 (t,  $J = 5.1$  Hz).

$^{19}\text{F}$  NMR (565 MHz,  $\text{CDCl}_3$ )  $\delta$  -115.79.

HRMS(ESI) calcd. for  $\text{C}_{22}\text{H}_{26}\text{NF}_2[\text{M}+\text{H}]^+$  342.20278, found 342.20251.

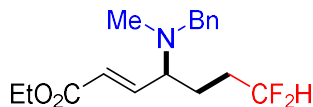

**Ethyl (*E*)-4-(benzyl(methyl)amino)-7,7-difluorohept-2-enoate (4w).** Dark brown oil, 32% yield, 40.2 mg. According to general experimental procedure A, the crude product was purified by column chromatography on silica gel (30:1 Hex/EtOAc to 20:1 Hex/EtOAc) to give the product **4w**.

$^1\text{H}$  NMR (600 MHz,  $\text{CDCl}_3$ )  $\delta$  7.27 - 7.15 (m, 5H), 6.88 (dd,  $J = 15.8, 8.6$  Hz, 1H), 5.87 - 5.62 (m, 2H), 4.16 (q,  $J = 7.1$  Hz, 2H), 3.60 (d,  $J = 13.4$  Hz, 1H), 3.40 (d,  $J = 13.4$  Hz, 1H), 3.10 - 3.06 (q,  $J = 7.6$  Hz, 1H), 2.14 (s, 3H), 1.97 - 1.75 (m, 3H), 1.60 - 1.55 (m, 1H), 1.25 (t,  $J = 7.1$  Hz, 3H).

$^{13}\text{C}$  NMR (151 MHz,  $\text{CDCl}_3$ )  $\delta$  164.94, 144.74, 138.00, 127.65, 127.35, 126.11, 123.06, 116.08 (t,  $J = 239.0$  Hz), 61.61, 59.55, 57.39, 35.75, 29.82 (t,  $J = 21.2$  Hz), 22.94 (t,  $J = 5.1$  Hz), 13.23.

$^{19}\text{F}$  NMR (565 MHz,  $\text{CDCl}_3$ )  $\delta$  -116.07.

HRMS(ESI) calcd. for  $\text{C}_{17}\text{H}_{24}\text{O}_2\text{NF}_2[\text{M}+\text{H}]^+$  312.17696, found 312.17654.

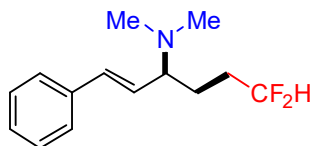

**(E)-6,6-Difluoro-N, N-dimethyl-1-phenylhex-1-en-3-amine (5a).** Dark brown oil, 42% yield, 20.1 mg. According to general experimental procedure A, the crude product was purified by column chromatography on silica gel (30:1 DCM/MeOH to 20:1 DCM/MeOH) to give the product **5a**.

$^1\text{H}$  NMR (600 MHz,  $\text{CDCl}_3$ )  $\delta$  7.38 (d,  $J = 7.2$  Hz, 2H), 7.33 (t,  $J = 7.6$  Hz, 2H), 7.25 (t,  $J = 7.3$  Hz, 1H), 6.48 (d,  $J = 15.9$  Hz, 1H), 6.10 (dd,  $J = 15.9, 9.0$  Hz, 1H), 5.85 (tt,  $J = 56.7, 4.0$  Hz, 1H), 2.94 - 2.91 (m, 1H), 2.30 (s, 6H), 1.93 - 1.83 (m, 3H), 1.71 - 1.65 (m, 1H).

$^{13}\text{C}$  NMR (151 MHz,  $\text{CDCl}_3$ )  $\delta$  136.62, 133.67, 128.61, 127.73, 127.70, 126.37, 117.25 (t,  $J = 238.8$  Hz), 67.17, 41.59, 31.15 (t,  $J = 21.1$  Hz), 25.08 (t,  $J = 5.0$  Hz).

$^{19}\text{F}$  NMR (565 MHz,  $\text{CDCl}_3$ )  $\delta$  -115.92.

HRMS(ESI) calcd. for  $\text{C}_{14}\text{H}_{20}\text{NF}_2[\text{M}+\text{H}]^+$  240.15583, found 240.15552.

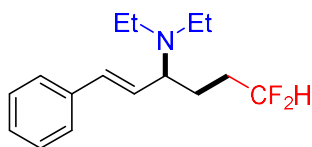

**(E)-N, N-Diethyl-6,6-difluoro-1-phenylhex-1-en-3-amine (5b).** Dark brown oil, 75% yield, 40.1 mg). According to general experimental procedure A, the crude product was purified by column chromatography on silica gel (30:1 DCM/MeOH to 20:1 DCM/MeOH) to give the product **5b**.

$^1\text{H}$  NMR (600 MHz,  $\text{CDCl}_3$ )  $\delta$  7.38 - 7.35 (m, 2H), 7.32 (t,  $J = 7.7$  Hz, 2H), 7.25 - 7.22 (m, 1H), 6.44 (d,  $J = 15.9$  Hz, 1H), 6.13 (dd,  $J = 15.9, 8.8$  Hz, 1H), 5.88 (tt,  $J = 57.0, 4.4$  Hz, 1H), 3.25 - 3.22 (m, 1H), 2.71 - 2.66 (m, 2H), 2.49 - 2.43 (m, 2H), 2.00 - 1.81 (m, 3H), 1.68 - 1.64 (m, 1H), 1.05 (t,  $J = 7.1$  Hz, 6H).

$^{13}\text{C}$  NMR (151 MHz,  $\text{CDCl}_3$ )  $\delta$  136.91, 132.41, 128.90, 128.57, 127.48, 126.28,

117.47 (t,  $J = 238.7$  Hz), 62.10, 43.54, 31.49 (t,  $J = 21.0$  Hz), 25.15 (t,  $J = 5.0$  Hz), 13.69.

$^{19}\text{F}$  NMR (565 MHz,  $\text{CDCl}_3$ )  $\delta$  -115.78.

HRMS(ESI) calcd. for  $\text{C}_{16}\text{H}_{24}\text{NF}_2[\text{M}+\text{H}]^+$  268.18713, found 268.18686.

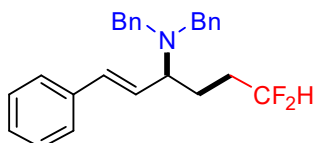

**(E)-N, N-Dibenzyl-6,6-difluoro-1-phenylhex-1-en-3-amine (5c).** Colorless oil, 64% yield, 50.1 mg. According to general experimental procedure A, the crude product was purified by column chromatography on silica gel (10:1 Hex/DCM to 5:1 Hex/DCM) to give the product **5c**.

$^1\text{H}$  NMR (600 MHz,  $\text{CDCl}_3$ )  $\delta$  7.48 - 7.27 (m, 15H), 6.45 (d,  $J = 15.9$  Hz, 1H), 6.28 (dd,  $J = 15.9, 8.9$  Hz, 1H), 5.74 (tt,  $J = 57.0, 4.4$  Hz, 1H), 3.92 (d,  $J = 13.7$  Hz, 2H), 3.46 (d,  $J = 13.7$  Hz, 2H), 3.27 - 3.20 (m, 1H), 2.17 - 2.04 (m, 1H), 2.01 - 1.93 (m, 1H), 1.91 - 1.78 (m, 1H), 1.75 - 1.67 (m, 1H).

$^{13}\text{C}$  NMR (151 MHz,  $\text{CDCl}_3$ )  $\delta$  139.99, 136.85, 133.76, 128.77, 128.69, 128.38, 127.73, 127.29, 126.99, 126.44, 117.33 (t,  $J = 238.8$  Hz), 59.80, 53.81, 31.30 (d,  $J = 21.0$  Hz), 24.99 (t,  $J = 5.0$  Hz).

$^{19}\text{F}$  NMR (565 MHz,  $\text{CDCl}_3$ )  $\delta$  -115.15.

HRMS(ESI) calcd. for  $\text{C}_{26}\text{H}_{28}\text{NF}_2[\text{M}+\text{H}]^+$  392.21843, found 392.21829.

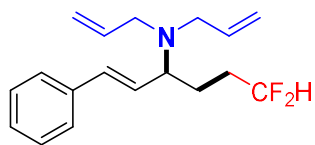

**(E)-N, N-Diallyl-6,6-difluoro-1-phenylhex-1-en-3-amine (5d).** Yellow oil, 26% yield, 15.1 mg. According to general experimental procedure A, the crude product was purified by column chromatography on silica gel (Hex to 25:1 Hex/EtOAc) to

give the product **5d**.

$^1\text{H}$  NMR (600 MHz,  $\text{CDCl}_3$ )  $\delta$  7.40 - 7.22 (m, 5H), 6.41 (d,  $J = 15.9$  Hz, 1H), 6.09 (dd,  $J = 15.9, 8.8$  Hz, 1H), 5.97 - 5.74 (m, 3H), 5.16 (dd,  $J = 33.4, 13.6$  Hz, 4H), 3.38 - 3.26 (m, 3H), 2.97 - 2.94 (m, 2H), 2.01 - 1.83 (m, 3H), 1.68 - 1.64 (m, 1H).

$^{13}\text{C}$  NMR (151 MHz,  $\text{CDCl}_3$ )  $\delta$  136.82, 133.16, 128.63, 127.63, 126.33, 117.42 (t,  $J = 238.8$  Hz), 117.01, 60.95, 52.73, 31.38 (t,  $J = 21.1$  Hz), 24.99 (t,  $J = 5.1$  Hz).

$^{19}\text{F}$  NMR (565 MHz,  $\text{CDCl}_3$ )  $\delta$  -115.85 (d,  $J = 15.7$  Hz).

HRMS(ESI) calcd. for  $\text{C}_{18}\text{H}_{24}\text{NF}_2[\text{M}+\text{H}]^+$  292.18713, found 292.18683.

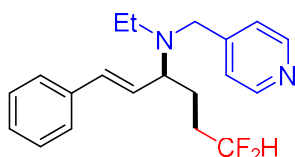

**(E)-N-Ethyl-6,6-difluoro-1-phenyl-N-(pyridin-4-ylmethyl)hex-1-en-3-amine (5e).**

Red brown oil, 70% yield, 46.2 mg. According to general experimental procedure A, the crude product was purified by column chromatography on silica gel (4:1 Hex/EtOAc to 3:2 Hex/EtOAc) to give the product **5e**.

$^1\text{H}$  NMR (600 MHz,  $\text{CDCl}_3$ )  $\delta$  8.54 (d,  $J = 5.7$  Hz, 2H), 7.40 - 7.23 (m, 7H), 6.42 (d,  $J = 15.9$  Hz, 1H), 6.14 (dd,  $J = 15.9, 8.8$  Hz, 1H), 5.83 (tt,  $J = 56.8, 3.9$  Hz, 1H), 3.84 (d,  $J = 15.1$  Hz, 1H), 3.47 (d,  $J = 15.1$  Hz, 1H), 3.21 - 3.17 (m, 1H), 2.69 - 2.64 (m, 1H), 2.53 - 2.48 (m, 1H), 2.06 - 1.83 (m, 3H), 1.71 - 1.66 (m, 1H), 1.07 (t,  $J = 7.1$  Hz, 3H).

$^{13}\text{C}$  NMR (151 MHz,  $\text{CDCl}_3$ )  $\delta$  150.47, 149.58, 136.61, 133.37, 128.68, 127.78, 127.45, 126.36, 123.52, 117.25 (t,  $J = 238.7$  Hz), 61.61, 53.26, 43.86, 31.37 (t,  $J = 21.1$  Hz), 25.09.

$^{19}\text{F}$  NMR (565 MHz,  $\text{CDCl}_3$ )  $\delta$  -115.90.

HRMS(ESI) calcd. for  $\text{C}_{20}\text{H}_{25}\text{N}_2\text{F}_2[\text{M}+\text{H}]^+$  331.19803, found 331.19791.



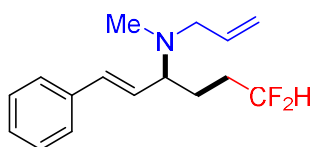

**(E)-N-Allyl-6,6-difluoro-N-methyl-1-phenylhex-1-en-3-amine (5f).** Yellow oil, 56% yield, 29.7 mg. According to general experimental procedure A, the crude product was purified by column chromatography on silica gel (10:1 Hex/EtOAc to 5:1 Hex/EtOAc) to give the product **5f**.

$^1\text{H}$  NMR (600 MHz,  $\text{CDCl}_3$ )  $\delta$  7.41 - 7.22 (m, 5H), 6.45 (d,  $J = 15.9$  Hz, 1H), 6.12 (dd,  $J = 15.9, 8.9$  Hz, 1H), 5.97 - 5.73 (m, 2H), 5.15 (dd,  $J = 26.2, 13.6$  Hz, 2H), 3.19 - 3.11 (m, 2H), 3.03 - 3.00 (m, 1H), 2.25 (s, 3H), 1.96 - 1.82 (m, 3H), 1.72 - 1.64 (m, 1H).

$^{13}\text{C}$  NMR (151 MHz,  $\text{CDCl}_3$ )  $\delta$  136.76, 136.27, 133.39, 128.64, 127.69, 127.66, 126.36, 117.38 (t,  $J = 239.0$  Hz), 117.27, 64.73, 57.29, 37.32, 31.31 (t,  $J = 21.1$  Hz), 25.04 (t,  $J = 5.2$  Hz).

$^{19}\text{F}$  NMR (565 MHz,  $\text{CDCl}_3$ )  $\delta$  -115.81.

HRMS(ESI) calcd. for  $\text{C}_{16}\text{H}_{22}\text{NF}_2[\text{M}+\text{H}]^+$  266.17148, found 266.17123.

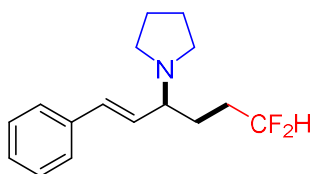

**(E)-1-(6,6-Difluoro-1-phenylhex-1-en-3-yl)pyrrolidine (5g).** Dark brown oil, 60% yield, 31.8 mg. According to general experimental procedure A, the crude product was purified by column chromatography on silica gel (30:1 DCM/MeOH to 20:1 DCM/MeOH) to give the product **5g**.

$^1\text{H}$  NMR (600 MHz,  $\text{CDCl}_3$ )  $\delta$  7.41 - 7.29 (m, 4H), 7.24 (d,  $J = 7.3$  Hz, 1H), 6.49 (d,  $J = 15.9$  Hz, 1H), 6.13 (dd,  $J = 15.9, 9.0$  Hz, 1H), 5.83 (tt,  $J = 57.1, 4.2$  Hz, 1H), 2.91 - 2.87 (m, 1H), 2.67 - 2.59 (m, 4H), 1.99 - 1.68 (m, 8H).

$^{13}\text{C}$  NMR (151 MHz,  $\text{CDCl}_3$ )  $\delta$  136.42, 133.28, 129.36, 128.68, 127.87, 126.44, 117.19 (t,  $J = 239.0$  Hz), 67.26, 51.75, 30.78 (t,  $J = 21.1$  Hz), 26.33 (t,  $J = 4.9$  Hz), 23.23.

$^{19}\text{F}$  NMR (565 MHz,  $\text{CDCl}_3$ )  $\delta$  -115.73.

HRMS(ESI) calcd. for  $\text{C}_{16}\text{H}_{22}\text{NF}_2^+[\text{M}+\text{H}]^+$  266.17148, found 266.17111.

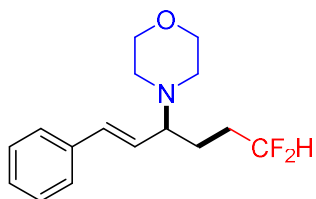

**(E)-4-(6,6-Difluoro-1-phenylhex-1-en-3-yl) morpholine (5h).** Dark brown oil, 83% yield, 46.4 mg. According to general experimental procedure A, the crude product was purified by column chromatography on silica gel (30:1 DCM/MeOH to 20:1 DCM/MeOH) to give the product **5h**.

$^1\text{H}$  NMR (600 MHz,  $\text{CDCl}_3$ )  $\delta$  7.39 - 7.36 (m, 2H), 7.32 (t,  $J = 7.6$  Hz, 2H), 7.28 - 7.22 (m, 1H), 6.48 (d,  $J = 15.9$  Hz, 1H), 6.09 (dd,  $J = 15.9, 9.0$  Hz, 1H), 5.86 (tt,  $J = 56.8, 4.0$  Hz, 1H), 3.78 - 3.65 (m, 4H), 2.96 - 2.93 (m, 1H), 2.66 - 2.63 (m, 2H), 2.54 - 2.51 (m, 2H), 1.94 - 1.88 (m, 3H), 1.74 - 1.62 (m, 1H).

$^{13}\text{C}$  NMR (151 MHz,  $\text{CDCl}_3$ )  $\delta$  136.44, 133.82, 128.67, 128.07, 127.84, 126.40, 117.22 (t,  $J = 239.2$  Hz), 67.37, 67.16, 50.24, 30.97 (t,  $J = 21.2$  Hz), 24.16 (t,  $J = 5.2$  Hz).

$^{19}\text{F}$  NMR (565 MHz,  $\text{CDCl}_3$ )  $\delta$  -115.89.

HRMS(ESI) calcd. for  $\text{C}_{16}\text{H}_{22}\text{ONF}_2^+[\text{M}+\text{H}]^+$  282.16639, found 282.16617.

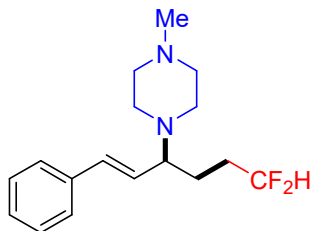

**(E)-1-(6,6-Difluoro-1-phenylhex-1-en-3-yl)-4-methylpiperazine (5i).** Dark brown oil, 82% yield, 48.2 mg. According to general experimental procedure A, the crude product was purified by column chromatography on silica gel (30:1 DCM/MeOH to 20:1 DCM/MeOH) to give the product **5i**.

$^1\text{H}$  NMR (600 MHz,  $\text{CDCl}_3$ )  $\delta$  7.37 - 7.29 (m, 4H), 7.23 (t,  $J = 7.2$  Hz, 1H), 6.46 (d,  $J = 15.9$  Hz, 1H), 6.11 (dd,  $J = 15.9, 9.0$  Hz, 1H), 5.85 (tt,  $J = 56.8, 3.9$  Hz, 1H), 2.97 - 2.94 (m, 1H), 2.73 - 2.34 (m, 8H), 2.29 (s, 3H), 1.92 - 1.86 (m, 3H), 1.71 - 1.64 (m, 1H).

$^{13}\text{C}$  NMR (151 MHz,  $\text{CDCl}_3$ )  $\delta$  136.57, 133.40, 128.58, 128.42, 127.66, 126.33, 117.26 (t,  $J = 238.6$  Hz), 66.85, 55.32, 55.15, 45.83, 31.10 (t,  $J = 21.1$  Hz), 24.54 (t,  $J = 5.1$  Hz).

$^{19}\text{F}$  NMR (565 MHz,  $\text{CDCl}_3$ )  $\delta$  -115.99.

HRMS(ESI) calcd. for  $\text{C}_{17}\text{H}_{25}\text{N}_2\text{F}_2[\text{M}+\text{H}]^+$  295.19803, found 295.19775.

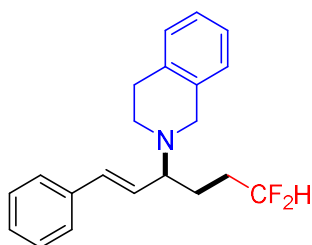

**(E)-2-(6,6-Difluoro-1-phenylhex-1-en-3-yl)-1,2,3,4-tetrahydroisoquinoline (5j).** Dark brown oil, 75% yield, 49 mg. According to general experimental procedure A, the crude product was purified by column chromatography on silica gel (15:1 Hex/EtOAc) to give the product **5j**.

$^1\text{H}$  NMR (600 MHz,  $\text{CDCl}_3$ )  $\delta$  7.32 - 7.11 (m, 5H), 7.04 - 6.88 (m, 4H), 6.45 (d,  $J$  = 15.9 Hz, 1H), 6.11 (dd,  $J$  = 15.9, 9.0 Hz, 1H), 5.78 (tt,  $J$  = 57.0, 4.3 Hz, 1H), 3.78 - 3.61 (m, 2H), 3.11 - 3.07 (m, 1H), 2.91 - 2.88 (m, 1H), 2.83 - 2.78m, 2H), 2.66 - 2.62 (dt,  $J$  = 11.7, 6.0 Hz, 1H), 1.94 - 1.82 (m, 3H), 1.73 - 1.67 (m, 1H).

$^{13}\text{C}$  NMR (151 MHz,  $\text{CDCl}_3$ )  $\delta$  136.68, 135.10, 134.57, 133.52, 128.71, 128.68, 128.29, 127.76, 126.70, 126.44, 126.10, 125.63, 117.37 (t,  $J$  = 239.0 Hz), 66.45, 52.79, 46.76, 31.20 (t,  $J$  = 21.1 Hz), 29.60, 24.83 (d,  $J$  = 5.0 Hz).

$^{19}\text{F}$  NMR (565 MHz,  $\text{CDCl}_3$ )  $\delta$  -115.83.

HRMS(ESI) calcd. for  $\text{C}_{21}\text{H}_{24}\text{NF}_2[\text{M}+\text{H}]^+$  328.18713, found 328.18680.

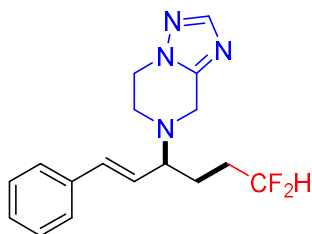

**(E)-7-(6,6-Difluoro-1-phenylhex-1-en-3-yl)-5,6,7,8-tetrahydro-[1,2,4]triazolo[1,5-a]pyrazine (5k).** Dark brown oil, 66% yield, 21.1 mg. According to general experimental procedure A, the crude product was purified by column chromatography on silica gel (1:1 Hex/EtOAc to 1:3 Hex/EtOAc) to give the product **5k**.

$^1\text{H}$  NMR (600 MHz,  $\text{CDCl}_3$ )  $\delta$  7.86 (s, 1H), 7.38 (dd,  $J$  = 8.4, 1.4 Hz, 2H), 7.34 (t,  $J$  = 7.6 Hz, 3H), 7.30 - 7.27 (m, 1H), 6.59 (d,  $J$  = 15.9 Hz, 1H), 6.12 (dd,  $J$  = 15.9, 9.0 Hz, 1H), 5.88 (tt,  $J$  = 56.9, 3.8 Hz, 1H), 4.22 - 4.14 (m, 2H), 3.93 (q,  $J$  = 15.5 Hz, 2H), 3.31 - 3.15 (m, 2H), 2.98 - 2.94 (m, 1H), 2.06 - 1.89 (m, 4H).

$^{13}\text{C}$  NMR (151 MHz,  $\text{CDCl}_3$ )  $\delta$  151.14, 135.96, 134.86, 128.72, 128.19, 126.46, 126.05, 120.10 - 113.04 (m), 65.89, 47.28, 46.78, 45.97, 30.85, 24.71.

$^{19}\text{F}$  NMR (565 MHz,  $\text{CDCl}_3$ )  $\delta$  -116.18.

HRMS(ESI) calcd. for  $C_{17}H_{21}N_4F_2[M+H]^+$  319.17287, found 319.17273.

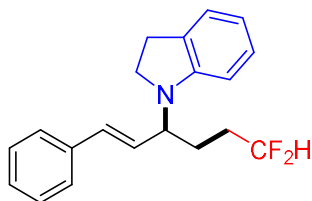

**(E)-1-(6,6-Difluoro-1-phenylhex-1-en-3-yl)indoline (5l).** Dark brown oil, 68% yield, 42.6 mg. According to general experimental procedure A, the crude product was purified by column chromatography on silica gel (Hex to 30:1 Hex/EtOAc) to give the product **5l**.

$^1H$  NMR (600 MHz,  $CDCl_3$ )  $\delta$  7.33 - 7.26 (m, 4H), 7.21 (t,  $J = 7.2$  Hz, 1H), 7.05 (t,  $J = 8.0$  Hz, 2H), 6.62 (t,  $J = 7.3$  Hz, 1H), 6.55 (d,  $J = 16.1$  Hz, 1H), 6.50 (d,  $J = 7.7$  Hz, 1H), 6.19 (dd,  $J = 16.1, 6.9$  Hz, 1H), 5.90 (tt,  $J = 56.8, 3.8$  Hz, 1H), 4.16 (q,  $J = 6.9$  Hz, 1H), 3.48 - 3.36 (m, 2H), 3.01 - 2.94 (m, 2H), 1.99 - 1.92 (m, 4H).

$^{13}C$  NMR (151 MHz,  $CDCl_3$ )  $\delta$  151.08, 136.60, 132.66, 129.99, 128.56, 127.71, 127.34, 127.07, 126.42, 124.63, 117.43, 117.12 (t,  $J = 239.0$  Hz), 107.25, 56.70, 46.76, 31.36 (t,  $J = 21.2$  Hz), 28.26, 24.34 (d,  $J = 5.0$  Hz).

$^{19}F$  NMR (565 MHz,  $CDCl_3$ )  $\delta$  -115.92.

HRMS(ESI) calcd. for  $C_{20}H_{22}NF_2[M+H]^+$  314.17148, found 314.17130.

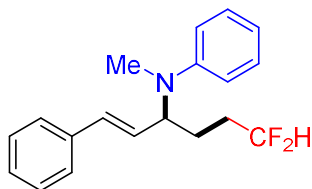

**(E)-N-(6,6-Difluoro-1-phenylhex-1-en-3-yl)-N-methylaniline (5m).** Yellow oil, 49% yield, 29.5 mg. According to general experimental procedure A, the crude product was purified by column chromatography on silica gel (Hex to 30:1 Hex/EtOAc) to give the product **5m**.

$^1H$  NMR (600 MHz,  $CDCl_3$ )  $\delta$  7.41 - 7.23 (m, 7H), 6.87 (d,  $J = 8.0$  Hz, 2H), 6.78 (t,  $J$

= 7.3 Hz, 1H), 6.52 (d,  $J = 17.5$  Hz, 1H), 6.24 (dd,  $J = 16.1, 5.3$  Hz, 1H), 5.88 (tt,  $J = 57.0, 3.9$  Hz, 1H), 4.54 - 4.49 (m, 1H), 2.84 (s, 3H), 2.05 - 1.89 (m, 4H).

$^{13}\text{C}$  NMR (151 MHz,  $\text{CDCl}_3$ )  $\delta$  150.38, 136.72, 131.28, 129.29, 128.59, 128.29, 127.65, 126.38, 117.27, 116.96 (t,  $J = 239.0$  Hz), 113.51, 59.42, 31.43, 31.37 (t,  $J = 21.1$  Hz), 24.54 (t,  $J = 4.9$  Hz).

$^{19}\text{F}$  NMR (565 MHz,  $\text{CDCl}_3$ )  $\delta$  -116.11.

HRMS(ESI) calcd. for  $\text{C}_{19}\text{H}_{22}\text{NF}_2[\text{M}+\text{H}]^+$  302.17148, found 302.17087.

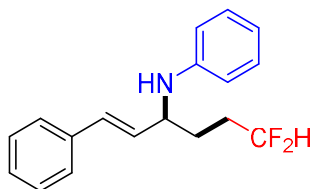

**(E)-N-(6,6-Difluoro-1-phenylhex-1-en-3-yl)aniline (5n)**. Dark brown oil, 69% yield, 39.7 mg. According to general experimental procedure A, the crude product was purified by column chromatography on silica gel (30:1 Hex/EtOAc to 20:1 Hex/EtOAc) to give the product **5n**.

$^1\text{H}$  NMR (600 MHz,  $\text{CDCl}_3$ )  $\delta$  7.36 – 7.12 (m, 7H), 6.70 (t,  $J = 7.3$  Hz, 1H), 6.64 (d,  $J = 7.8$  Hz, 2H), 6.57 (d,  $J = 15.9$  Hz, 1H), 6.08 (dd,  $J = 15.9, 6.5$  Hz, 1H), 5.85 (tt,  $J = 56.7, 4.5$  Hz, 1H), 4.03 - 4.00 (m, 1H), 2.02 - 1.94 (m, 2H), 1.86 - 1.82 (m, 2H).

$^{13}\text{C}$  NMR (151 MHz,  $\text{CDCl}_3$ )  $\delta$  147.09, 136.59, 131.25, 130.79, 129.35, 128.63, 127.73, 126.46, 117.87, 117.01 (t,  $J = 239.2$  Hz), 113.62, 55.13, 30.88 (t,  $J = 21.2$  Hz), 28.27 (t,  $J = 4.8$  Hz).

$^{19}\text{F}$  NMR (565 MHz,  $\text{CDCl}_3$ )  $\delta$  -115.91.

HRMS(ESI) calcd. for  $\text{C}_{18}\text{H}_{20}\text{NF}_2[\text{M}+\text{H}]^+$  288.15583, found 288.15552.

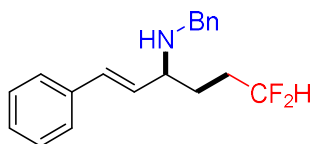

**(E)-N-Benzyl-6,6-difluoro-1-phenylhex-1-en-3-amine (5o).** Dark brown oil, 80% yield, 48.2 mg. According to general experimental procedure A, the crude product was purified by column chromatography on silica gel (20:1 Hex/EtOAc to 10:1 Hex/EtOAc) to give the product **5o**.

$^1\text{H}$  NMR (600 MHz,  $\text{CDCl}_3$ )  $\delta$  7.42 - 7.21 (m, 10H), 6.47 (d,  $J = 15.9$  Hz, 1H), 5.99 (dd,  $J = 15.9, 8.4$  Hz, 1H), 5.81 (tt,  $J = 56.9, 4.4$  Hz, 1H), 3.86 (d,  $J = 13.2$  Hz, 1H), 3.70 (d,  $J = 13.2$  Hz, 1H), 3.24 - 3.20 (m, 1H), 1.95 - 1.86 (m, 2H), 1.75 - 1.65 (m, 2H).

$^{13}\text{C}$  NMR (151 MHz,  $\text{CDCl}_3$ )  $\delta$  140.37, 136.73, 132.27, 131.78, 128.69, 128.51, 128.23, 127.72, 127.05, 126.42, 117.31 (t,  $J = 239.0$  Hz), 59.82, 51.23, 30.82 (t,  $J = 21.1$  Hz), 28.26 (t,  $J = 4.9$  Hz).

$^{19}\text{F}$  NMR (565 MHz,  $\text{CDCl}_3$ )  $\delta$  -115.75.

HRMS(ESI) calcd. for  $\text{C}_{19}\text{H}_{22}\text{NF}_2[\text{M}+\text{H}]^+$  302.17148, found 302.17133.

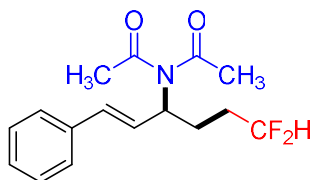

**(E)-N-Acetyl-N-(6,6-difluoro-1-phenylhex-1-en-3-yl)acetamide (5p).** Dark brown oil, 15% yield, 8.9 mg. According to general experimental procedure A, the crude product was purified by column chromatography on silica gel (10:1 Hex/EtOAc to 7:3 Hex/EtOAc) to give the product **5p**.

$^1\text{H}$  NMR (500 MHz,  $\text{CDCl}_3$ )  $\delta$  7.42 - 7.27 (m, 5H), 6.60 - 6.48 (m, 2H), 5.88 (tt,  $J = 56.6, 4.2$  Hz, 1H), 4.77 - 4.73 (m, 1H), 2.43 (s, 6H), 2.31 - 2.13 (m, 2H), 1.95 - 1.80 (m, 2H).

$^{13}\text{C}$  NMR (126 MHz,  $\text{CDCl}_3$ )  $\delta$  173.78, 136.00, 133.08, 128.67, 128.17, 127.42, 126.57, 116.73 (t,  $J = 239.5$  Hz), 59.26, 31.24 (t,  $J = 21.3$  Hz), 26.95, 25.46 (t,  $J = 5.0$  Hz).

$^{19}\text{F}$  NMR (471 MHz,  $\text{CDCl}_3$ )  $\delta$  -115.82.

HRMS(ESI) calcd. for  $\text{C}_{16}\text{H}_{19}\text{O}_2\text{NF}_2\text{Na}[\text{M}+\text{Na}]^+$  318.12714, found 318.12760.

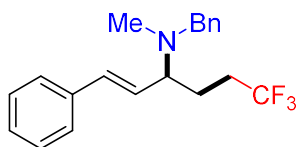

**(E)-N-Benzyl-6,6,6-trifluoro-N-methyl-1-phenylhex-1-en-3-amine (6a).** Colorless oil, 70% yield, 46.6 mg. According to general experimental procedure A, the crude product was purified by column chromatography on silica gel (30:1 Hex/EtOAc to 20:1 Hex/EtOAc) to give the product **6a**.

$^1\text{H}$  NMR (600 MHz,  $\text{CDCl}_3$ )  $\delta$  7.41 - 7.23 (m, 10H), 6.46 (d,  $J = 15.9$  Hz, 1H), 6.21 (dd,  $J = 15.9, 8.8$  Hz, 1H), 3.68 (d,  $J = 13.3$  Hz, 1H), 3.48 (d,  $J = 13.3$  Hz, 1H), 3.16 - 3.12 (m, 1H), 2.36 - 2.30 (m, 1H), 2.22 (s, 3H), 2.16 - 2.10 (m, 1H), 2.03 - 1.95 (m, 1H), 1.82 - 1.75 (m, 1H).

$^{13}\text{C}$  NMR (151 MHz,  $\text{CDCl}_3$ )  $\delta$  139.57, 136.71, 133.64, 128.78, 128.70, 128.36, 127.79, 127.09, 127.09, 126.44, 63.97, 58.48, 36.96, 30.97 (q,  $J = 28.4$  Hz), 25.15 (q,  $J = 2.0$  Hz).

$^{19}\text{F}$  NMR (565 MHz,  $\text{CDCl}_3$ )  $\delta$  -66.14.

HRMS(ESI) calcd. for  $\text{C}_{20}\text{H}_{23}\text{NF}_3[\text{M}+\text{H}]^+$  334.17771, found 334.17734.

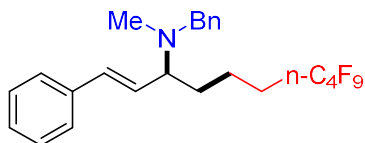

**(E)-N-Benzyl-7,7,8,8,9,9,10,10,10-nonafluoro-N-methyl-1-phenyldec-1-en-3-amine (6b).** Brown oil. 53% yield, 52.4 mg. According to general experimental procedure



A, the crude product was purified by column chromatography on silica gel (30:1 Hex/EtOAc to 20:1 Hex/EtOAc) to give the product **6b**.

$^1\text{H}$  NMR (600 MHz,  $\text{CDCl}_3$ )  $\delta$  7.36 - 7.13 (m, 10H), 6.38 (d,  $J = 15.7$  Hz, 1H), 6.19 - 6.08 (m, 1H), 3.63 (d,  $J = 13.3$  Hz, 1H), 3.42 (d,  $J = 13.3$  Hz, 1H), 3.08 - 3.05 (m, 1H), 2.17 (s, 3H), 2.04 - 1.95 (m, 2H), 1.82 - 1.76 (m, 1H), 1.67 - 1.51 (m, 3H).

$^{13}\text{C}$  NMR (151 MHz,  $\text{CDCl}_3$ )  $\delta$  138.54, 135.84, 132.30, 127.78, 127.61, 127.27, 126.70, 126.58, 125.92, 125.34, 63.55, 57.41, 36.25, 31.14, 29.58 (t,  $J = 22.3$  Hz), 16.18 (t,  $J = 3.3$  Hz).

$^{19}\text{F}$  NMR (565 MHz,  $\text{CDCl}_3$ )  $\delta$  -81.03 - -81.06 (m), -114.50 - -114.55 (m), -124.43 - -124.49 (m), -125.99 - -126.03 (m).

HRMS(ESI) calcd. for  $\text{C}_{24}\text{H}_{25}\text{NF}_9[\text{M}+\text{H}]^+$  498.18378, found 498.18365.

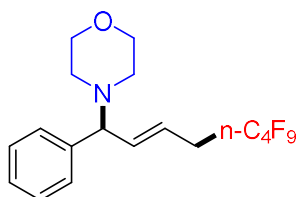

**(E)-4-(5,5,6,6,7,7,8,8,8-Nonafluoro-1-phenyloct-2-en-1-yl)morpholine (6c)**. Pale yellow oil, 66% yield, 57.6 mg. According to general experimental procedure B, the crude product was purified by column chromatography on silica gel (30:1 DCM/MeOH to 20:1 DCM/MeOH) to give the product **6c**.

$^1\text{H}$  NMR (600 MHz,  $\text{CDCl}_3$ )  $\delta$  7.32 (d,  $J = 4.4$  Hz, 4H), 7.25 (t,  $J = 4.3$  Hz, 1H), 5.84 (dd,  $J = 15.4, 8.8$  Hz, 1H), 5.65 (dt,  $J = 14.9, 7.1$  Hz, 1H), 3.74 - 3.64 (m, 5H), 2.87 - 2.73 (m, 2H), 2.55 - 2.25 (m, 4H).

$^{13}\text{C}$  NMR (126 MHz,  $\text{CDCl}_3$ )  $\delta$  140.92, 139.98, 128.66, 127.95, 127.46, 118.70 (t,  $J = 4.5$  Hz), 74.00, 67.10, 51.90, 34.52 (t,  $J = 22.6$  Hz).

$^{19}\text{F}$  NMR (471 MHz,  $\text{CDCl}_3$ )  $\delta$  -81.02 - 81.06 (m), -113.01 - -113.11 (m), -123.96 -

-124.02 (m), -126.00 – -126.16 (m).

HRMS(ESI) calcd. for  $C_{18}H_{19}ONF_9^+[M+H]^+$  436.13174, found 436.13138.

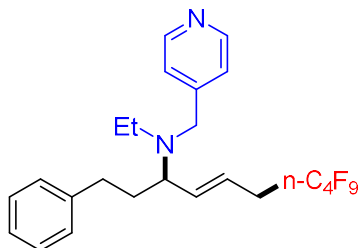

**(E)-N-Ethyl-7,7,8,8,9,9,10,10,10-nonafluoro-1-phenyl-N-(pyridin-4-ylmethyl)dec-4-en-3-amine (6d).** Yellow oil, 86% yield, 88.2 mg. According to general experimental procedure B, the crude product was purified by column chromatography on silica gel (10:1 Hex/EtOAc to 5:1 Hex/EtOAc) to give the product **6d**.

$^1H$  NMR (600 MHz,  $CDCl_3$ )  $\delta$  8.50 (d,  $J = 6.0$  Hz, 2H), 7.25 (dd,  $J = 9.4, 6.9$  Hz, 4H), 7.19 – 7.10 (m, 3H), 5.70 (dd,  $J = 15.4, 8.6$  Hz, 1H), 5.46 (dt,  $J = 14.9, 7.1$  Hz, 1H), 3.77 (d,  $J = 15.2$  Hz, 1H), 3.39 (d,  $J = 15.2$  Hz, 1H), 3.12 - 3.08 (m, 1H), 2.91 - 2.84 (m, 2H), 2.71 - 2.57 (m, 3H), 2.44 - 2.40 (m, 1H), 1.95 - 1.90 (m, 1H), 1.81 - 1.71 (m, 1H), 1.02 (t,  $J = 7.1$  Hz, 3H).

$^{13}C$  NMR (151 MHz,  $CDCl_3$ )  $\delta$  150.34, 149.65, 142.02, 137.13, 128.38, 128.34, 125.85, 123.40, 119.75 (t,  $J = 3.9$  Hz), 61.04, 53.18, 43.99, 34.65 (t,  $J = 22.5$  Hz), 34.08, 32.69, 13.75.

$^{19}F$  NMR (565 MHz,  $CDCl_3$ )  $\delta$  -81.09 - -81.13 (m), -113.34 – 113.39 (m), -113.96 – -124.02 (m), -126.06 - -126.14 (m).

HRMS(ESI) calcd. for  $C_{24}H_{26}N_2F_9[M+H]^+$  513.19467, found 513.19470.

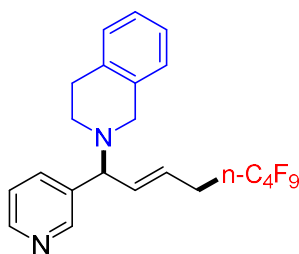

**(E)-2-(5,5,6,6,7,7,8,8,8-Nonafluoro-1-(pyridin-3-yl)oct-2-en-1-yl)-1,2,3,4-tetrahydroisoquinoline (6e).** Red brown oil, 61% yield, 58.9 mg. According to general experimental procedure B, the crude product was purified by column chromatography on silica gel (9:1:1 Hex/EtOAc/DCM to 4:1:1 Hex/EtOAc/DCM) to give the product **6e**.

$^1\text{H}$  NMR (600 MHz,  $\text{CDCl}_3$ )  $\delta$  8.65 - 8.51 (m, 2H), 7.75 (d,  $J = 7.9$  Hz, 1H), 7.29 (dd,  $J = 7.9, 4.8$  Hz, 1H), 7.16 - 7.07 (m, 3H), 6.95 (d,  $J = 7.0$  Hz, 1H), 5.92 (dd,  $J = 15.4, 8.8$  Hz, 1H), 5.76 (dt,  $J = 14.9, 7.1$  Hz, 1H), 4.03 (d,  $J = 8.8$  Hz, 1H), 3.73 (d,  $J = 14.9$  Hz, 1H), 3.56 (d,  $J = 14.9$  Hz, 1H), 2.92 - 2.82 (m, 4H), 2.77 - 2.69 (m, 2H).

$^{13}\text{C}$  NMR (126 MHz,  $\text{CDCl}_3$ )  $\delta$  149.43, 148.83, 138.92, 136.97, 135.41, 134.43, 134.29, 128.65, 126.70, 126.27, 125.73, 123.74, 119.78 (t,  $J = 4.3$  Hz), 70.15, 54.19, 48.08, 34.58 (t,  $J = 22.7$  Hz), 28.90.

$^{19}\text{F}$  NMR (471 MHz,  $\text{CDCl}_3$ )  $\delta$  -81.10 - -81.14 (m), -113.14 - -113.40 (m), -124.13 - -124.19 (m), -126.11 - -126.15 (m).

HRMS(ESI) calcd. for  $\text{C}_{22}\text{H}_{20}\text{N}_2\text{F}_9$ [M+H] $^+$  483.14772, found 483.14752.

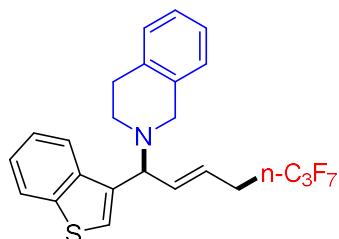

**(E)-2-(1-(Benzo[b]thiophen-3-yl)-5,5,6,6,7,7,7-heptafluorohept-2-en-1-yl)-1,2,3,4-tetrahydroisoquinoline (6f).** Yellow oil, 88% yield, 85.8 mg. According to general experimental procedure B, the crude product was purified by column chromatography

on silica gel (4:1 Hex/DCM to 1:1 Hex/DCM) to give the product **6f**.

$^1\text{H}$  NMR (600 MHz,  $\text{CDCl}_3$ )  $\delta$  8.20 - 8.12 (m, 1H), 7.89 - 7.82 (m, 1H), 7.39 - 7.29 (m, 3H), 7.15 - 7.05 (m, 3H), 6.95 (d,  $J = 7.2$  Hz, 1H), 6.12 (dd,  $J = 15.4, 8.9$  Hz, 1H), 5.78 (dt,  $J = 14.9, 7.2$  Hz, 1H), 4.39 (d,  $J = 8.9$  Hz, 1H), 3.81 (d,  $J = 14.9$  Hz, 1H), 3.61 (d,  $J = 14.9$  Hz, 1H), 2.91 - 2.73 (m, 6H).

$^{13}\text{C}$  NMR (151 MHz,  $\text{CDCl}_3$ )  $\delta$  141.01, 138.08, 137.86, 136.17, 135.00, 134.69, 128.67, 126.84, 126.17, 125.66, 124.57, 124.03, 123.66, 123.24, 122.87, 119.42 (t,  $J = 4.3$  Hz), 67.87, 54.30, 48.13, 34.38 (t,  $J = 22.6$  Hz), 29.33.

$^{19}\text{F}$  NMR (565 MHz,  $\text{CDCl}_3$ )  $\delta$  -80.53 - -80.56 (m), -113.73 - -113.79 (m), -127.29 - -127.33 (m).

HRMS(ESI) calcd. for  $\text{C}_{24}\text{H}_{21}\text{NF}_7\text{S}[\text{M}+\text{H}]^+$  488.12774, found 488.12500.

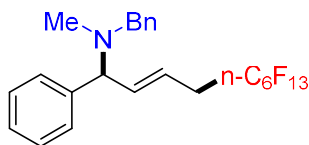

**(E)-N-Benzyl-5,5,6,6,7,7,8,8,9,9,10,10,10-tridecafluoro-N-methyl-1-phenyldec-2-en-1-amine (6g)**. Yellow oil, 50% yield, 56.9 mg. According to general experimental procedure B, the crude product was purified by column chromatography on silica gel (30:1 Hex/EtOAc to 20:1 Hex/EtOAc) to give the product **6g**.

$^1\text{H}$  NMR (600 MHz,  $\text{CDCl}_3$ )  $\delta$  7.46 - 7.25 (m, 10H), 6.00 (dd,  $J = 13.4, 8.1$  Hz, 1H), 5.69 (dt,  $J = 15.0, 7.2$  Hz, 1H), 4.03 (d,  $J = 8.7$  Hz, 1H), 3.56- 3.48 (m, 2H), 2.93 - 2.86 (m, 2H), 2.15 (s, 3H).

$^{13}\text{C}$  NMR (151 MHz,  $\text{CDCl}_3$ )  $\delta$  141.78, 139.41, 128.71, 128.55, 128.24, 127.89, 127.28, 126.86, 118.96, 71.49, 58.91, 39.20, 34.73 (t,  $J = 22.5$  Hz).

$^{19}\text{F}$  NMR (565 MHz,  $\text{CDCl}_3$ )  $\delta$  -80.77 - 80.81 (m), -112.88 - -112.97 (m), -121.92 - -121.93 (m), -122.86 - -122.87 (m), -123.07 - -123.08 (m), -126.09 - -126.12 (m).

HRMS(ESI) calcd. for C<sub>24</sub>H<sub>21</sub>NF<sub>13</sub>[M+H]<sup>+</sup> 570.14520, found 570.14609.

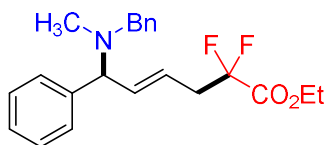

**Ethyl (E)-6-(Benzyl(methyl)amino)-2,2-difluoro-6-phenylhex-4-enoate (6h).**

Yellow oil, 60% yield, 44.8 mg. According to general experimental procedure B, the crude product was purified by column chromatography on silica gel (30:1 Hex/EtOAc to 20:1 Hex/EtOAc) to give the product **6h**.

Only the data of the major product is shown here.

<sup>1</sup>H NMR (500 MHz, CDCl<sub>3</sub>) δ 7.46 - 7.28 (m, 10H), 5.94 - 5.91 (m, 1H), 5.67 - 5.61 (m, 1H), 4.18 (q, *J* = 7.1 Hz, 2H), 3.97 (d, *J* = 8.7 Hz, 1H), 3.55 - 3.47 (m, 2H), 2.95 - 2.80 (m, 2H), 2.12 (s, 3H), 1.27 (t, *J* = 7.1 Hz, 3H).

<sup>13</sup>C NMR (151 MHz, CDCl<sub>3</sub>) δ 163.83 (t, *J* = 32.4 Hz), 142.09, 138.79, 128.73, 128.55, 128.24, 127.89, 127.22, 126.86, 120.80, 115.37 (t, *J* = 251.3 Hz), 71.78, 62.82, 58.95, 39.30, 38.09 (t, *J* = 23.9 Hz), 13.91.

<sup>19</sup>F NMR (471 MHz, CDCl<sub>3</sub>) δ -103.96 – -106.41 (m).

HRMS(ESI) calcd. for C<sub>22</sub>H<sub>26</sub>O<sub>2</sub>NF<sub>2</sub>[M+H]<sup>+</sup> 374.19183, found 374.19261.

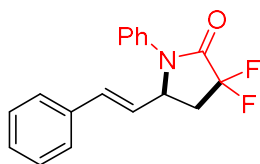

**(E)-3,3-difluoro-1-phenyl-5-styrylpyrrolidin-2-one (8a).** Colorless oil, 70% yield, 41.9 mg. According to general experimental procedure C, the crude product was purified by column chromatography on silica gel (10:1 Hex/EtOAc to 5:1 Hex/EtOAc) to give the product **8a**.

$^1\text{H}$  NMR (600 MHz,  $\text{CDCl}_3$ )  $\delta$  7.47 (d,  $J = 7.6$  Hz, 2H), 7.36 (t,  $J = 7.7$  Hz, 2H), 7.31 – 7.19 (m, 6H), 6.57 (d,  $J = 15.8$  Hz, 1H), 5.99 (dd,  $J = 15.8, 8.6$  Hz, 1H), 4.88 – 4.84 (m, 1H), 2.97 – 2.88 (m, 1H), 2.54 – 2.42 (m, 1H).

$^{13}\text{C}$  NMR (151 MHz,  $\text{CDCl}_3$ )  $\delta$  162.72 (t,  $J = 31.1$  Hz), 136.26, 135.25, 134.96, 129.20, 128.75, 128.64, 127.03, 126.87, 126.72, 126.45, 123.49, 117.34 (t,  $J = 249.9$  Hz), 76.96, 57.24 (t,  $J = 3.4$  Hz), 36.84 (t,  $J = 21.8$  Hz).

$^{19}\text{F}$  NMR (565 MHz,  $\text{CDCl}_3$ )  $\delta$  -101.91 – -102.41 (m), -105.35 – -105.84 (m).

HRMS(ESI) calcd. for  $\text{C}_{18}\text{H}_{16}\text{ONF}_2^+[\text{M}+\text{H}]^+$  300.11893, found 300.11944.

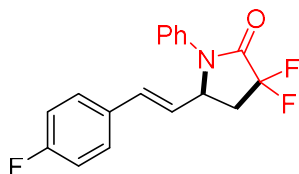

**(E)-3,3-Difluoro-5-(4-fluorostyryl)-1-phenylpyrrolidin-2-one (8b)**. Yellow oil, 74% yield, 46.9 mg. According to general experimental procedure C, the crude product was purified by column chromatography on silica gel (10:1 Hex/EtOAc to 5:1 Hex/EtOAc) to give the product **8b**.

$^1\text{H}$  NMR (600 MHz,  $\text{CDCl}_3$ )  $\delta$  7.47 (d,  $J = 8.6$  Hz, 2H), 7.37 (t,  $J = 7.9$  Hz, 2H), 7.30 – 7.19 (m, 3H), 6.96 (t,  $J = 8.6$  Hz, 2H), 6.54 (d,  $J = 15.8$  Hz, 1H), 5.91 (dd,  $J = 15.8, 8.5$  Hz, 1H), 4.88 – 4.84 (m, 1H), 2.98 – 2.89 (m, 1H), 2.53 – 2.45 (m, 1H).

$^{13}\text{C}$  NMR (151 MHz,  $\text{CDCl}_3$ )  $\delta$  163.65, 162.69 (t,  $J = 31.2$  Hz), 162.00, 136.22, 131.45 (t,  $J = 3.1$  Hz), 129.21, 128.38 (d,  $J = 8.2$  Hz), 127.05, 126.18, 123.49, 118.18 (d,  $J = 251.7$  Hz), 115.69 (d,  $J = 21.8$  Hz), 57.16 (t,  $J = 3.5$  Hz), 36.77 (t,  $J = 21.9$  Hz).

$^{19}\text{F}$  NMR (565 MHz,  $\text{CDCl}_3$ )  $\delta$  -101.82 – -102.32 (m), -105.36 – -105.85 (m).

HRMS(ESI) calcd. for  $\text{C}_{18}\text{H}_{15}\text{ONF}_3^+[\text{M}+\text{H}]^+$  318.10898, found 318.11002.

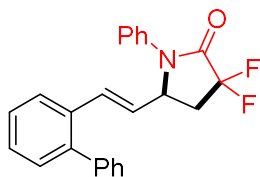

**(E)-5-(2-((1,1'-Biphenyl)-2-yl)vinyl)-3,3-difluoro-1-phenylpyrrolidin-2-one (8c).**

Colorless oil, 82% yield, 61.6 mg. According to general experimental procedure C, the crude product was purified by column chromatography on silica gel (20:1 Hex/EtOAc to 10:1 Hex/EtOAc) to give the product **8c**.

$^1\text{H}$  NMR (600 MHz,  $\text{CDCl}_3$ )  $\delta$  7.47 – 7.32 (m, 8H), 7.31 – 7.23 (m, 4H), 7.14 – 7.08 (m, 2H), 6.54 (d,  $J = 14.0$  Hz, 1H), 5.89 – 5.85 (m, 1H), 4.73 – 4.69 (m, 1H), 2.88 – 2.79 (m, 1H), 2.48 – 2.36 (m, 1H).

$^{13}\text{C}$  NMR (151 MHz,  $\text{CDCl}_3$ )  $\delta$  162.66 (t,  $J = 31.2$  Hz), 141.21, 140.29, 136.28, 134.50, 133.43, 130.30, 129.71, 129.20, 128.52, 128.22, 127.68, 127.38, 127.30, 127.12, 126.48, 117.39 (t,  $J = 249.0$  Hz), 57.47 (t,  $J = 3.2$  Hz), 36.58 (t,  $J = 21.8$  Hz).

$^{19}\text{F}$  NMR (565 MHz,  $\text{CDCl}_3$ )  $\delta$  -101.94 - -102.42 (m), -105.28 - -105.78 (m).

HRMS(ESI) calcd. for  $\text{C}_{24}\text{H}_{20}\text{ONF}_2^+[\text{M}+\text{H}]^+$  376.15074, found 376.14981.

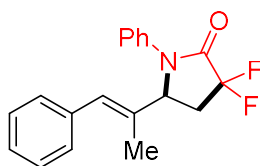

**(E)-3,3-Difluoro-1-phenyl-5-(1-phenylprop-1-en-2-yl)pyrrolidin-2-one (8d).**

Colorless oil, 51% yield, 32 mg. According to general experimental procedure C, the crude product was purified by column chromatography on silica gel (20:1 Hex/EtOAc to 10:1 Hex/EtOAc) to give the product **8d**.

$^1\text{H}$  NMR (600 MHz,  $\text{CDCl}_3$ )  $\delta$  7.49 (d,  $J = 7.3$  Hz, 2H), 7.41 – 7.34 (m, 2H), 7.29 (d,  $J = 7.6$  Hz, 2H), 7.25 – 7.19 (m, 2H), 7.12 (d,  $J = 7.4$  Hz, 2H), 6.56 (s, 1H), 4.91 –

4.88 (m, 1H), 2.97 – 2.85 (m, 1H), 2.53 – 2.44 (m, 1H), 1.66 (s, 3H).

$^{13}\text{C}$  NMR (151 MHz,  $\text{CDCl}_3$ )  $\delta$  163.09 (t,  $J = 31.3$  Hz), 136.14, 133.31, 131.26, 129.04, 128.82, 128.32, 127.34, 126.87, 123.02, 117.40 (t,  $J = 249.2$  Hz), 61.86 (t,  $J = 3.0$  Hz), 34.72 (t,  $J = 22.1$  Hz), 12.20.

$^{19}\text{F}$  NMR (565 MHz,  $\text{CDCl}_3$ )  $\delta$  -101.56 - -102.05 (m), -102.70 - -103.18 (m).

HRMS(ESI) calcd. for  $\text{C}_{19}\text{H}_{18}\text{ONF}_2^+[\text{M}+\text{H}]^+$  314.13509, found 314.13409.

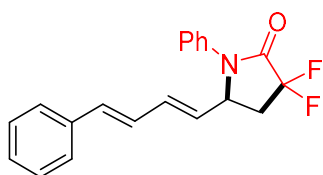

**3, 3-Difluoro-1-phenyl-5-((1E,3E)-4-phenylbuta-1,3-dien-1-yl)pyrrolidin-2-one (8e).** Colorless oil, 49% yield, 31.9 mg. According to general experimental procedure C, the crude product was purified by column chromatography on silica gel (20:1 Hex/EtOAc to 10:1 Hex/EtOAc) to give the product **8e**.

$^1\text{H}$  NMR (600 MHz,  $\text{CDCl}_3$ )  $\delta$  7.46 – 7.21 (m, 10H), 6.63 (dd,  $J = 15.6, 10.4$  Hz, 1H), 6.52 (d,  $J = 15.7$  Hz, 1H), 6.35 (dd,  $J = 15.2, 10.4$  Hz, 1H), 5.58 (dd,  $J = 15.2, 8.6$  Hz, 1H), 4.80 - 4.76 (m, 1H), 2.93 - 2.85 (m, 1H), 2.47 – 2.39 (m, 1H).

$^{13}\text{C}$  NMR (151 MHz,  $\text{CDCl}_3$ )  $\delta$  162.65 (t,  $J = 31.3$  Hz), 136.46, 136.26, 135.13, 134.85, 129.82, 129.18, 128.73, 128.22, 126.70, 126.59, 123.45, 117.31 (t,  $J = 249.9$  Hz), 56.93 (t,  $J = 3.5$  Hz), 36.89 (t,  $J = 21.7$  Hz).

$^{19}\text{F}$  NMR (565 MHz,  $\text{CDCl}_3$ )  $\delta$  -102.15 - -102.67 (m), -105.31 - -105.81 (m).

HRMS(ESI) calcd. for  $\text{C}_{20}\text{H}_{18}\text{ONF}_2^+[\text{M}+\text{H}]^+$  326.13509, found 326.13416.



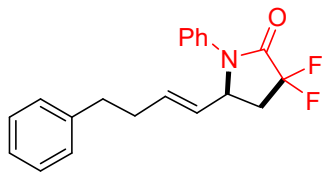

**(E)-3,3-Difluoro-1-phenyl-5-(4-phenylbut-1-en-1-yl)pyrrolidin-2-one (8f).**

Colorless oil, 63% yield, 41.3 mg. According to general experimental procedure C, the crude product was purified by column chromatography on silica gel (20:1 Hex/EtOAc to 10:1 Hex/EtOAc) to give the product **8f**.

$^1\text{H}$  NMR (600 MHz,  $\text{CDCl}_3$ )  $\delta$  7.37 (d,  $J = 6.5$  Hz, 4H), 7.26 – 7.20 (m, 3H), 7.15 (t,  $J = 7.4$  Hz, 1H), 7.01 (d,  $J = 7.2$  Hz, 2H), 5.72 – 5.64 (m, 1H), 5.24 (dd,  $J = 15.0, 7.5$  Hz, 1H), 4.63 - 4.59 (m, 1H), 2.83 - 2.74 (m, 1H), 2.60 - 2.50 (m, 2H), 2.34 – 2.24 (m, 3H).

$^{13}\text{C}$  NMR (151 MHz,  $\text{CDCl}_3$ )  $\delta$  162.66 (t,  $J = 31.2$  Hz), 140.95, 136.23, 135.95, 129.06, 128.42, 128.39, 128.18, 126.89, 126.04, 123.64, 117.42 (t,  $J = 249.6$  Hz), 56.88 (t,  $J = 3.3$  Hz), 36.70 (t,  $J = 21.7$  Hz), 35.09, 33.55.

$^{19}\text{F}$  NMR (565 MHz,  $\text{CDCl}_3$ )  $\delta$  -102.14 - -102.63 (m), -105.20 - -105.69 (m).

HRMS(ESI) calcd. for  $\text{C}_{20}\text{H}_{20}\text{ONF}_2^+[\text{M}+\text{H}]^+$  328.15074, found 328.14978.

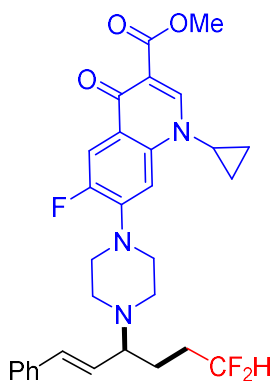

**Methyl**

**(E)-1-cyclopropyl-7-(4-(6,6-difluoro-1-phenylhex-1-en-3-yl)piperazin-1-yl)-6-fluoro-4-oxo-1,4-dihydroquinoline-3-carboxylate (9a).** Brown solid, 80% yield, 85.9 mg. mp: 178.8 - 199.6 °C. The crude product was purified by column chromatography

on silica gel (30:1 DCM/MeOH to 20:1 DCM/MeOH) to give the product **9a**.

$^1\text{H}$  NMR (600 MHz,  $\text{CDCl}_3$ )  $\delta$  8.46 (s, 1H), 7.87 (d,  $J = 13.2$  Hz, 1H), 7.41 – 7.23 (m, 6H), 6.52 (d,  $J = 15.9$  Hz, 1H), 6.15 (dd,  $J = 15.9, 9.0$  Hz, 1H), 5.90 (tt,  $J = 57.0, 3.4$  Hz, 1H), 3.86 (s, 3H), 3.48 – 3.39 (m, 1H), 3.28 – 3.27 (m, 4H), 3.14 – 3.04 (m, 1H), 2.88 – 2.87 (m, 2H), 2.74 – 2.73 (m, 2H), 1.96 – 1.93 (m, 3H), 1.80 – 1.68 (m, 1H), 1.31 – 1.30 (m, 2H), 1.10 – 1.09 (m, 2H).

$^{13}\text{C}$  NMR (151 MHz,  $\text{CDCl}_3$ )  $\delta$  173.1 (d,  $J = 1.8$  Hz), 166.37, 153.39 (d,  $J = 248.9$  Hz), 148.35, 144.56 (d,  $J = 10.6$  Hz), 138.01, 136.38, 133.88, 128.68, 127.90, 127.74, 126.40, 122.90 (d,  $J = 6.9$  Hz), 117.22 (t,  $J = 238.9$  Hz), 113.16 (d,  $J = 23.2$  Hz), 109.93, 104.80 (d,  $J = 2.7$  Hz), 66.87, 52.02, 50.25 (d,  $J = 4.4$  Hz), 49.27, 34.55, 31.07 (t,  $J = 21.2$  Hz), 24.47 (t,  $J = 4.9$  Hz), 8.12.

$^{19}\text{F}$  NMR (565 MHz,  $\text{CDCl}_3$ )  $\delta$  -115.89, -123.41.

HRMS(ESI) calcd. for  $\text{C}_{30}\text{H}_{33}\text{O}_3\text{N}_3\text{F}_3^+[\text{M}+\text{H}]^+$  540.24685, found 540.24701.

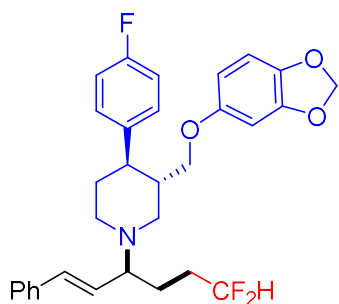

**(3*S*,4*R*)-3-((Benzo[*d*][1,3]dioxol-5-yloxy)methyl)-1-((*E*)-6,6-difluoro-1-phenylhex-1-en-3-yl)-4-(4-fluorophenyl)piperidine (**9b**, *dr* = 1:1)**. Red brown oil, 97% yield, 101.6 mg. The crude product was purified by column chromatography on silica gel (10:1 Hex/EtOAc) to give the product **9b**.

$^1\text{H}$  NMR (500 MHz,  $\text{CDCl}_3$ )  $\delta$  7.49 – 7.29 (m, 5H), 7.22 – 7.20 (m, 2H), 7.04 – 7.00 (m, 2H), 6.68 – 6.66 (m, 1H), 6.56 (d,  $J = 15.9$  Hz, 1H), 6.41 (t,  $J = 3.1$  Hz, 1H), 6.28 – 6.23 (m, 1H), 6.21 – 6.17 (m, 1H), 6.07 – 5.83 (m, 3H), 3.65 – 3.61 (m, 1H), 3.52 – 3.48 (m, 1H), 3.44 – 3.24 (m, 1H), 3.20 – 2.97 (m, 2H), 2.53 – 2.20 (m, 4H), 2.05 – 1.78 (m, 6H).

$^{13}\text{C}$  NMR (126 MHz,  $\text{CDCl}_3$ )  $\delta$  161.57 (d,  $J = 244.4$  Hz), 154.44, 154.40, 148.22, 141.66, 141.62, 139.8, 136.7, 133.54, 133.42, 128.89, 128.83, 128.70, 128.09, 127.77, 126.48, 119.34, 117.44 (t,  $J = 241.9$  Hz), 115.44 (d,  $J = 20.2$  Hz), 107.89, 105.70, 105.60, 101.11, 98.06, 98.03, 69.71, 67.19, 67.13, 56.24, 52.55, 51.18, 47.69, 44.56, 44.43, 42.58, 34.81, 34.73, 31.42 (t,  $J = 21.0$  Hz), 24.95 – 24.79 (m).

$^{19}\text{F}$  NMR (471 MHz,  $\text{CDCl}_3$ )  $\delta$  -115.56 - -115.60 (m), -116.41 – 116.43 (m).

HRMS(ESI) calcd. for  $\text{C}_{31}\text{H}_{33}\text{O}_3\text{NF}_3^+[\text{M}+\text{H}]^+$  524.24070, found 524.24054.

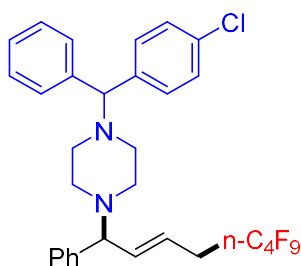

**4-((4-Chlorophenyl)(phenyl)methyl)-1-((*S,E*)-5,5,6,6,7,7,8,8,8-nonafluoro-1-phenyloct-2-en-1-yl)piperidine (**9c**,  $dr = 1:1$ ). Yellow oil, 80% yield, 101.4 mg. The crude product was purified by column chromatography on silica gel (30:1 Hex/EtOAc to 20:1 Hex/EtOAc) to give the product **9c**.**

$^1\text{H}$  NMR (600 MHz,  $\text{CDCl}_3$ )  $\delta$  7.36 – 7.14 (m, 14H), 5.86 – 5.82 (m, 1H), 5.64 – 5.59 (m, 1H), 4.19 (s, 1H), 3.71 (d,  $J = 8.7$  Hz, 1H), 2.84 – 2.12 (m, 10H).

$^{13}\text{C}$  NMR (151 MHz,  $\text{CDCl}_3$ )  $\delta$  142.22, 142.19, 141.42, 142.40, 141.21, 140.38, 132.55, 132.50, 129.25, 129.23, 128.66, 128.60, 128.54, 127.97, 127.90, 127.89, 127.36, 127.16, 127.12, 118.28, 75.48, 73.68, 51.99, 51.50, 34.49 (t,  $J = 22.4$  Hz).

$^{19}\text{F}$  NMR (565 MHz,  $\text{CDCl}_3$ )  $\delta$  -81.01 – -81.04 (m), -112.16 – -114.73 (m), -124.2 - -112.12 (m), -126.03 – -126.07 (m).

HRMS(ESI) calcd. for  $\text{C}_{31}\text{H}_{29}\text{ClN}_2\text{F}_9^+[\text{M}+\text{H}]^+$  635.18755, found 635.18353.

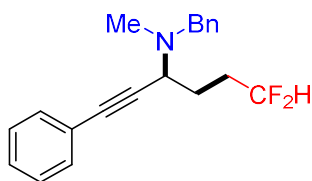

***N*-Benzyl-6,6-difluoro-*N*-methyl-1-phenylhex-1-yn-3-amine (11).** Red brown oil, 20% yield, 12.5 mg. The crude product was purified by column chromatography on silica gel (30:1 Hex/EtOAc to 20:1 Hex/EtOAc) to give the product **11**.

$^1\text{H}$  NMR (600 MHz,  $\text{CDCl}_3$ )  $\delta$  7.40 (dd,  $J = 6.7, 3.1$  Hz, 2H), 7.31 – 7.18 (m, 8H), 5.79 (tt,  $J = 56.8, 4.4$  Hz, 1H), 3.67 (d,  $J = 13.1$  Hz, 1H), 3.60 – 3.45 (m, 2H), 2.23 (s, 3H), 2.01 – 1.79 (m, 4H).

$^{13}\text{C}$  NMR (151 MHz,  $\text{CDCl}_3$ )  $\delta$  130.78, 128.00, 127.35, 127.31, 127.16, 126.20, 121.98, 116.06 (t,  $J = 239.0$  Hz), 58.41, 54.01, 36.35, 30.22 (t,  $J = 21.3$  Hz), 25.16 (t,  $J = 4.8$  Hz).

$^{19}\text{F}$  NMR (565 MHz,  $\text{CDCl}_3$ )  $\delta$  -115.92.

HRMS(ESI) calcd. for  $\text{C}_{20}\text{H}_{22}\text{NF}_2^+[\text{M}+\text{H}]^+$  314.17148, found 314.17111.

## 7. References

- (1) Zhu, S.; Guo, Z.; Huang, Z.; Jiang, H. *Chem. Eur. J.* **2014**, *20*, 2425.
- (2) Lishchynskiy, A.; Muniz, K. *Chem. Eur. J.* **2012**, *18*, 2212.
- (3) Hilt, G.; Danz, M. *Synthesis* **2008**, 2257.
- (4) Graham, T. J. A.; Poole, T. H.; Reese, C. N.; Goess, B. C. *J. Org. Chem.* **2011**, *76*, 4132.
- (5) Zhang, R.; Li, Q.; Zhang, M.; Chai, S.; Duan, Y.; Su, J.; Zhao, Q.; Zhang, C. *Chem. Commun.* **2020**, *56*, 13551.
- (6) Rose, P.; Emge, S.; Yoshida, J.; Hilt, G. *Beilstein J. Org. Chem.* **2015**, *11*, 174.
- (1) Yasukawa, N.; Yokoyama, H.; Masuda, M.; Monguchi, Y.; Sajiki, H.; Sawama, Y. *Green Chem.* **2018**, *20*, 1213.
- (7) Watanabe, M.; Morais, G. R.; Mataka, S.; Ideta, K.; Thiemann, T. *Z. Naturforsch* **2005**, *60b*, 909.
- (8) Khan, F. A.; Budanur, B. M. *Tetrahedron* **2015**, *71*, 7600.
- (9) Robert, C.; Sever, S. *Aust. J. Chem.* **1987**, *40*, 1499.
- (10) Dong, D. -J.; Li, H. -H.; Tian, S. -K. *J. Am. Chem. Soc.* **2010**, *132*, 5018.
- (11) Madden, K. S.; David, S.; Knowles, J. P.; Whiting, A. *Chem. Commun.* **2015**, *51*, 11409.
- (12) McAlpine, N. J.; Wang, L.; Carrow, B. P. *J. Am. Chem. Soc.* **2018**, *140*, 13634.
- Shing Cheung, K. P.; Kurandina, D.; Yata, T.; Gevorgyan, V. *J. Am. Chem. Soc.* **2020**, *142*, 9932.
- (13) Maishal, T. K.; Mondal, B.; Puranik, V. G.; Wadgaonkar, P. P.; Lahiri, G. K. *J. Organomet. Chem.* **2005**, *690*, 1018.
- (14) Tortajada, A.; Ninokata, R.; Martin, R. *J. Am. Chem. Soc.* **2018**, *140*, 2050.
- Sun, Y.; Zhang, G.; Chin. *J. Chem.* **2018**, *36*, 708.
- (15) Habrant, D.; Stengel, B.; Meunier, S.; Mioskowski, C. *Chem. Eur. J.* **2007**, *13*, 5433.
- (16) Dhumaskar, K. L.; Bhat, Chinmay.; Tilve, S. G. *Synth. Commun.* **2014**, *44*, 1501.
- (17) Adamson, N. J.; Jeddi, H.; Malcolmson, S. J. *J. Am. Chem. Soc.* **2019**, *141*, 8574.
- (18) Yang, X.; Ammeter, D.; Idowu, T.; Domalaon, R.; Beizuela, M.; Okunnu, O.; Bi, L.; Guerrero, Y. A.; Zhanel, G. G.; Kumar, A.; Schweizer, F. *Eur. J. Med. Chem.* **2019**, *175*, 187.
- (19) Dhumaskar, K. L.; Bhat, Chinmay.; Tilve, S. G. *Synth. Commun.* **2014**, *44*, 1501.

(20) Adamson, N. J.; Jeddi, H.; Malcolmson, S. J. *J. Am. Chem. Soc.* **2019**, *141*, 8574.

(21) Yang, X.; Ammeter, D.; Idowu, T.; Domalaon, R.; Beizuela, M.; Okunnu, O.;

Bi, L.; Guerrero, Y. A.; Zhanel, G. G.; Kumar, A.; Schweizer, F. *Eur. J. Med.*

*Chem.* **2019**, *175*, 187.

## 8. NMR Spectra of New Products

### (*E*)-*N*-benzyl-6,6-difluoro-*N*-methyl-1-phenylhex-1-en-3-amine (4a)

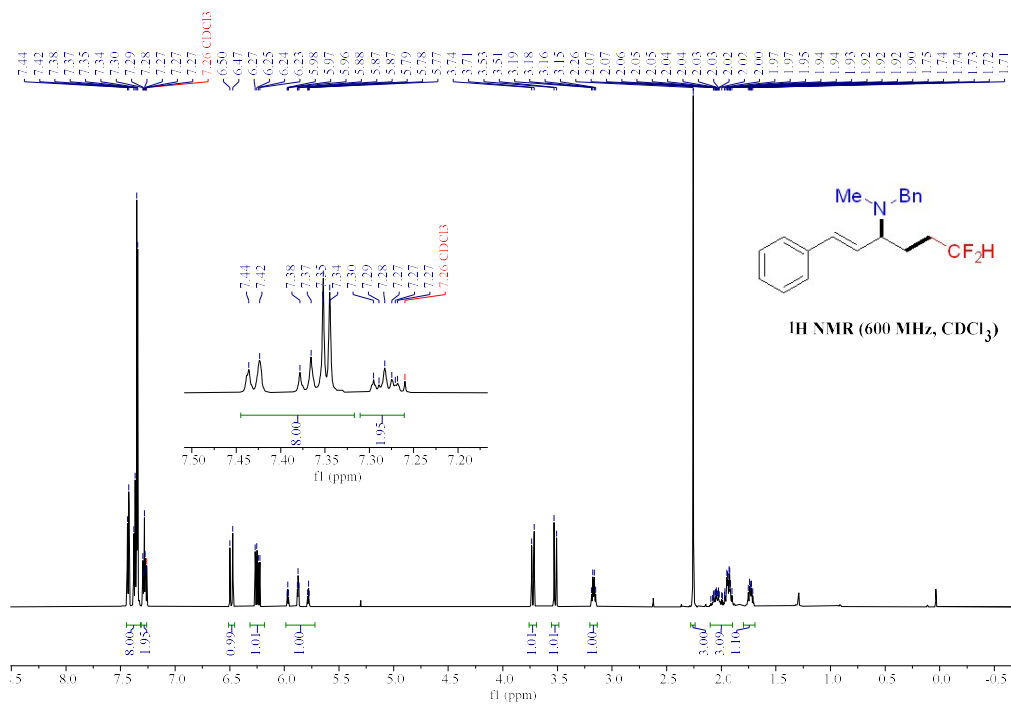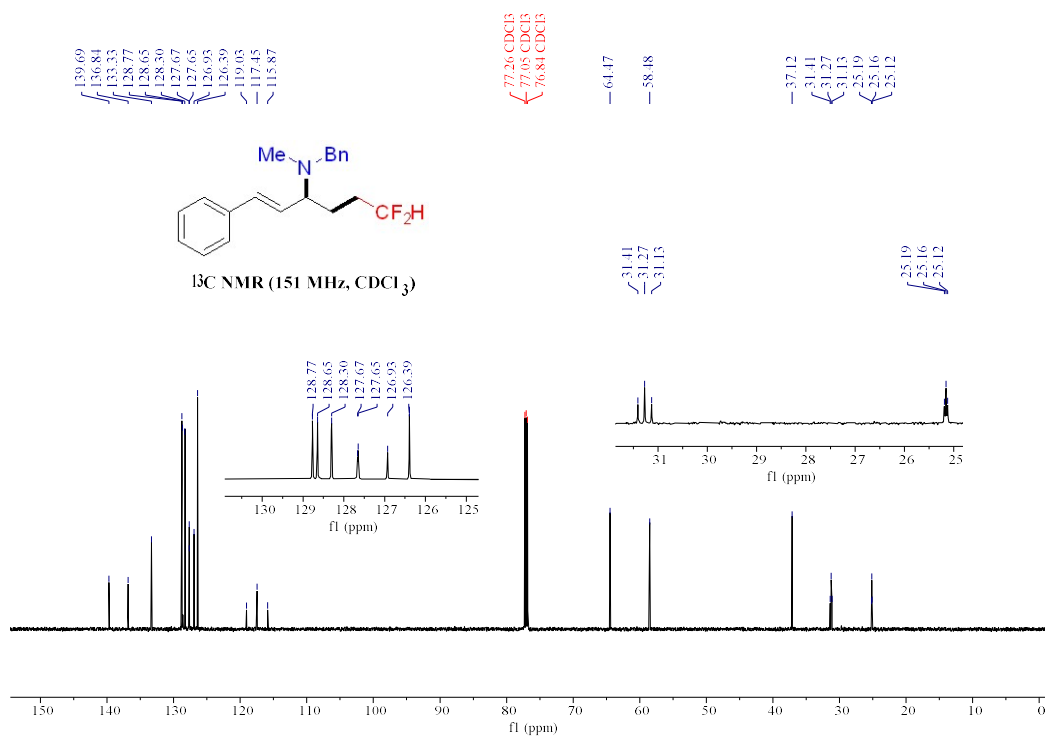

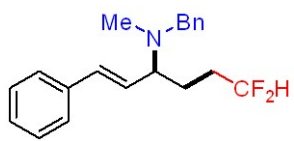

<sup>19</sup>F NMR (565 MHz, CDCl<sub>3</sub>)

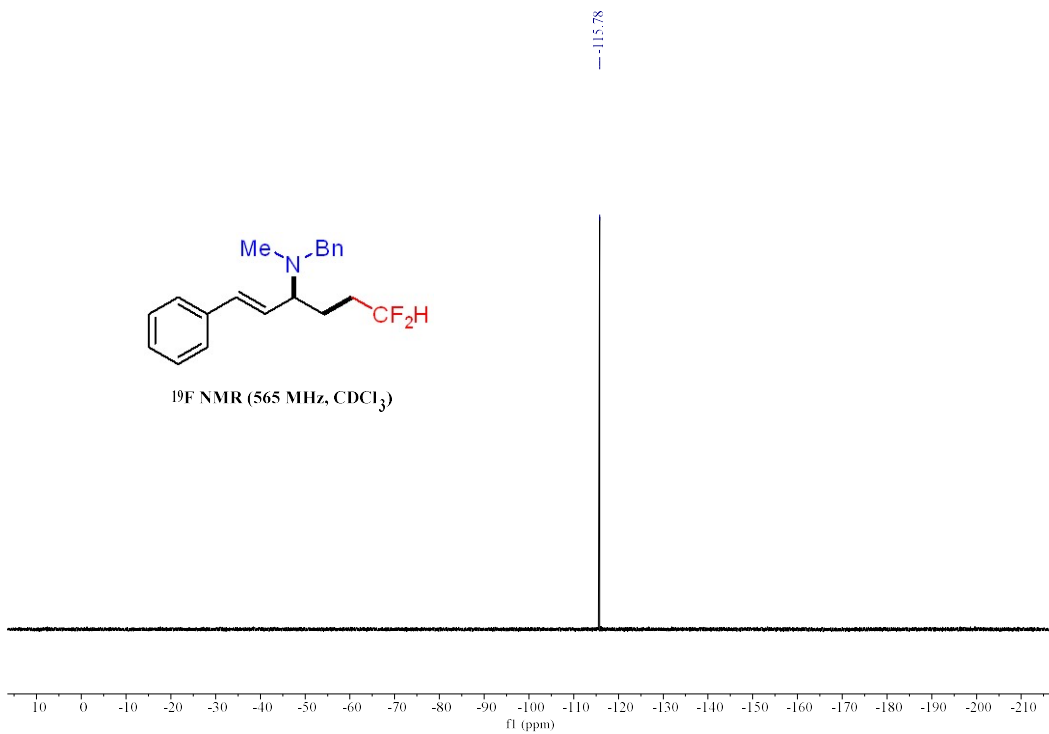



**(E)-N-Benzyl-6,6-difluoro-N-methyl-1-(p-tolyl)hex-1-en-3-amine (4b)**

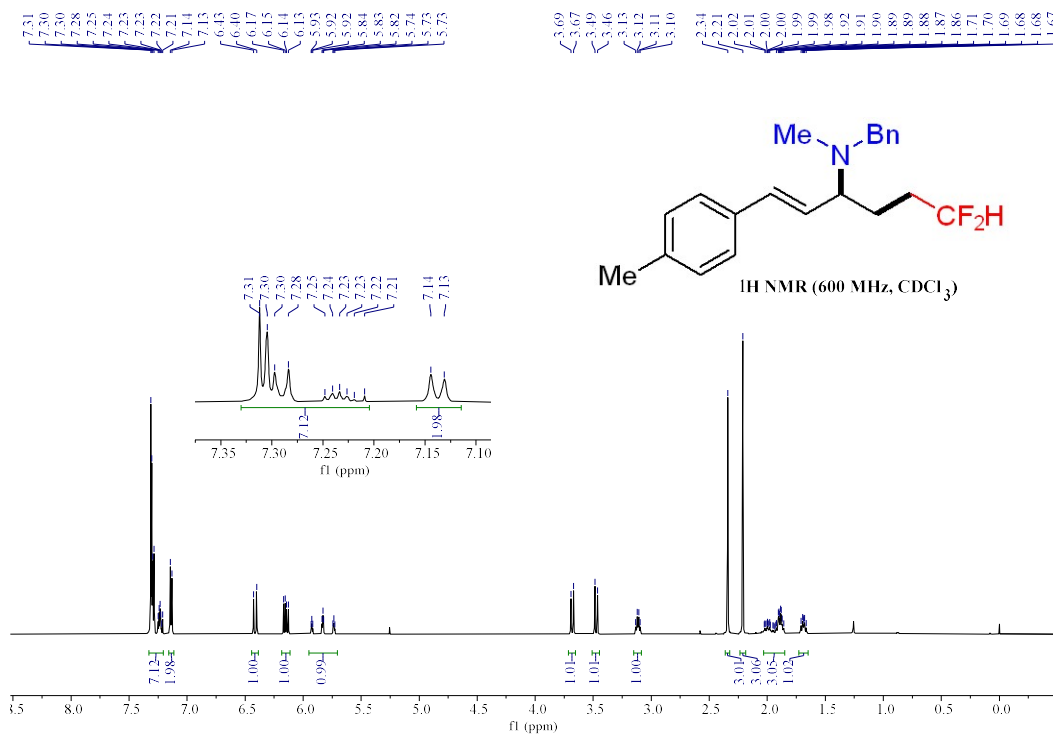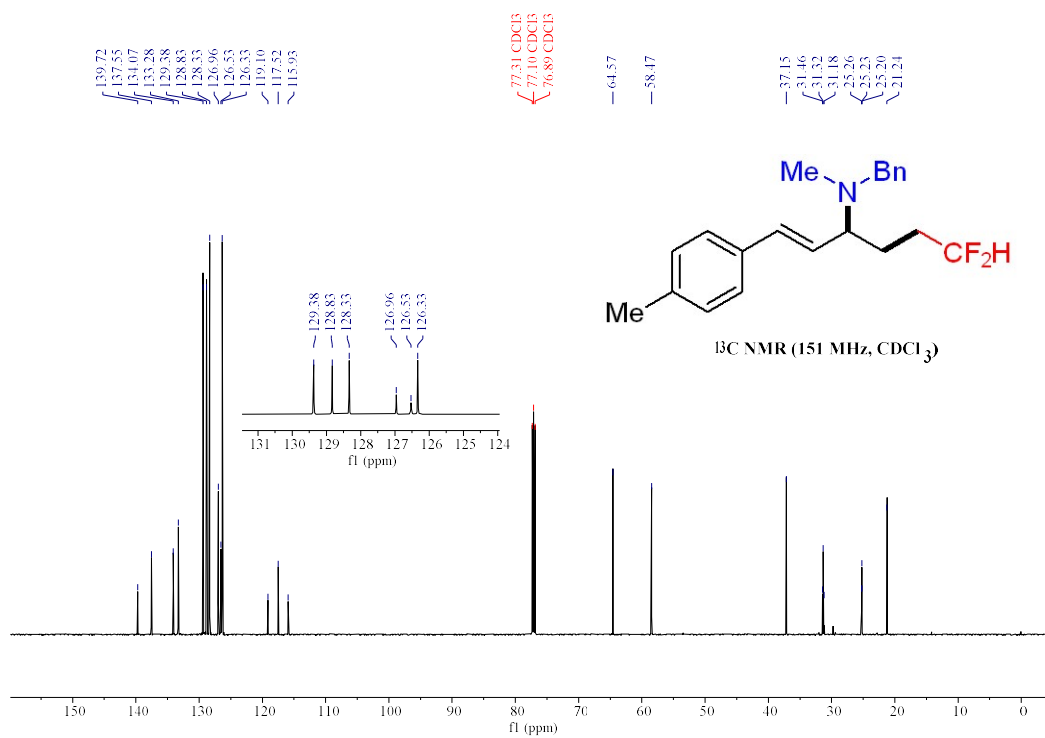

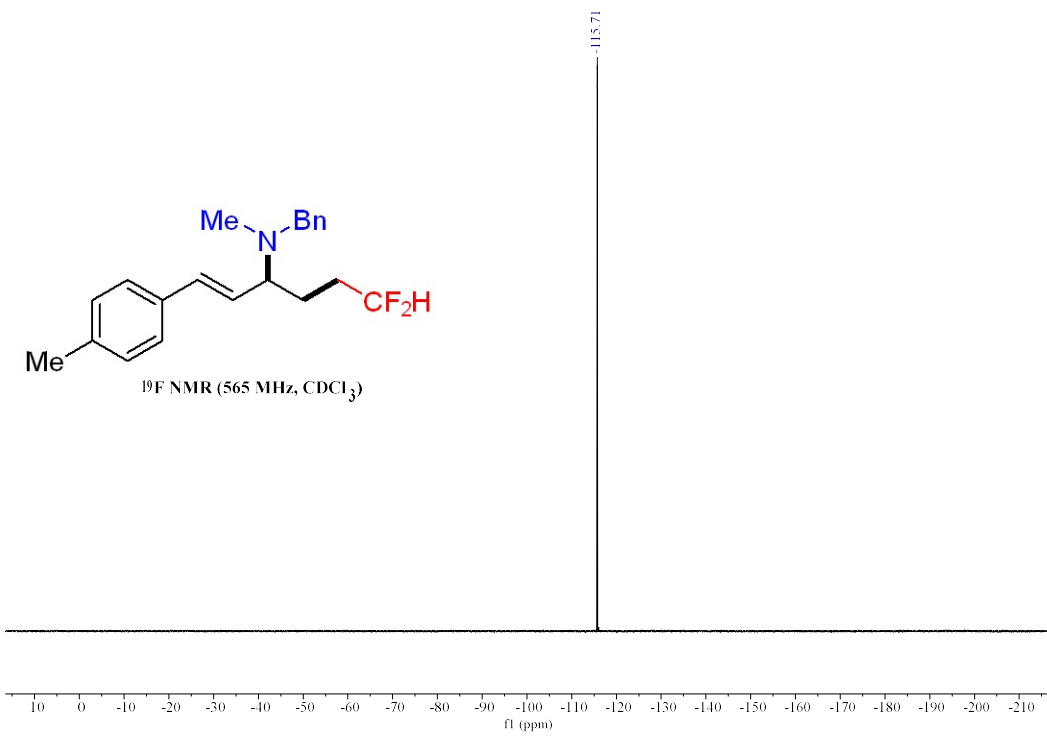

**(E)-N-Benzyl-6,6-difluoro-1-(4-methoxyphenyl)-N-methylhex-1-en-3-amine (4c)**

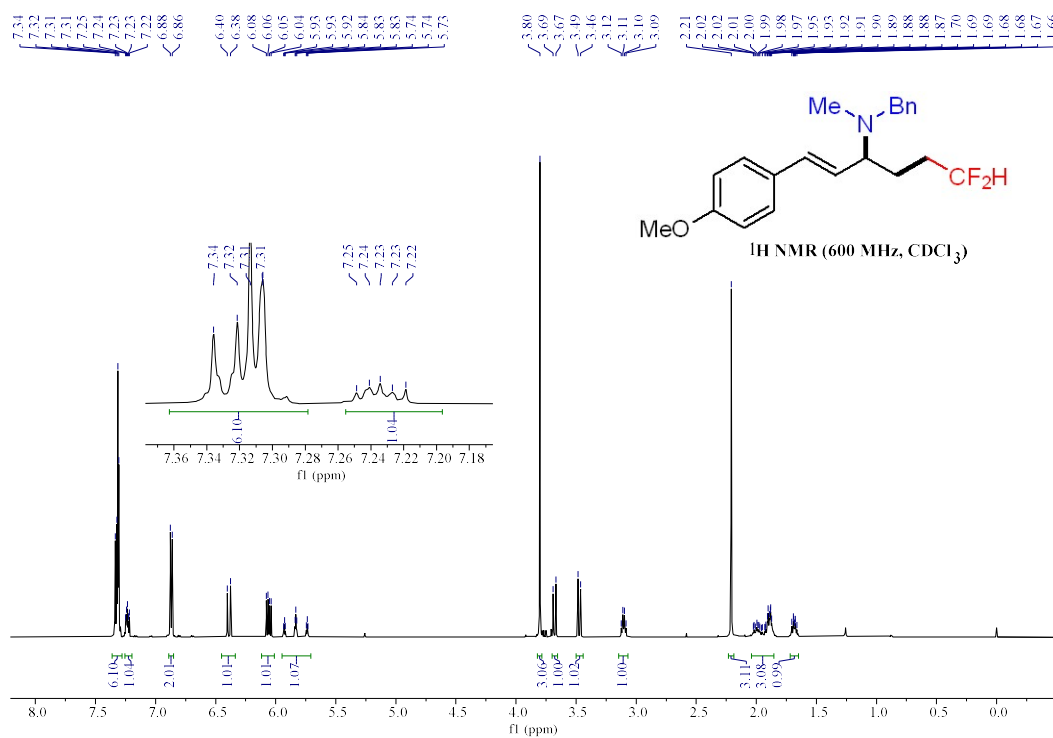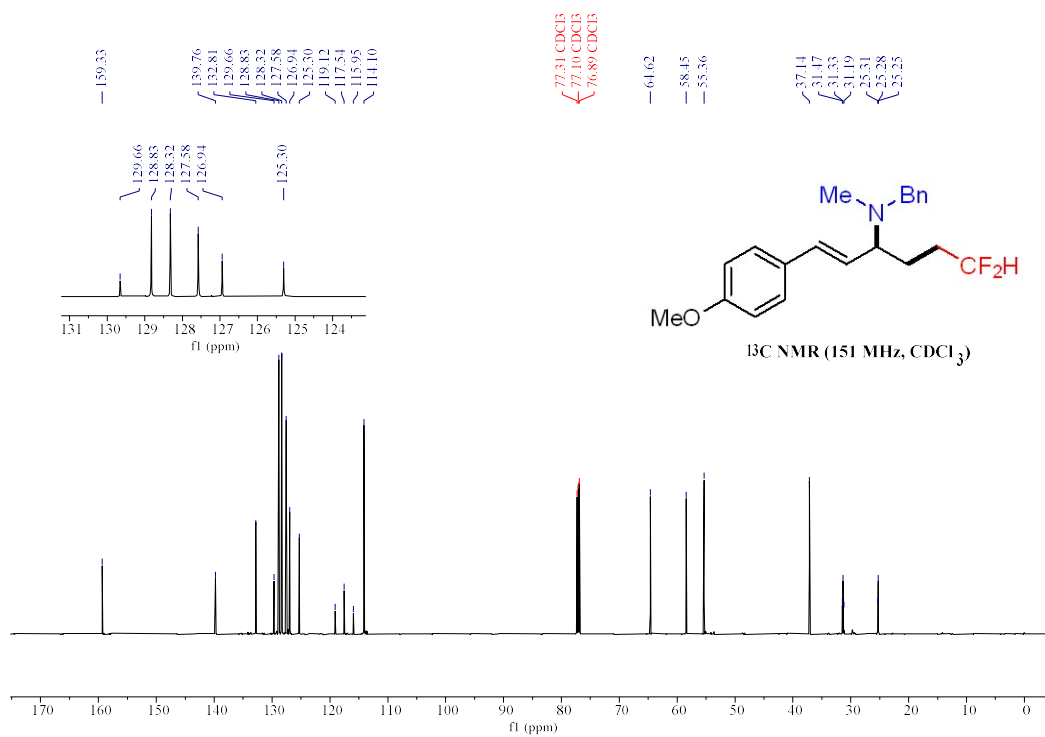

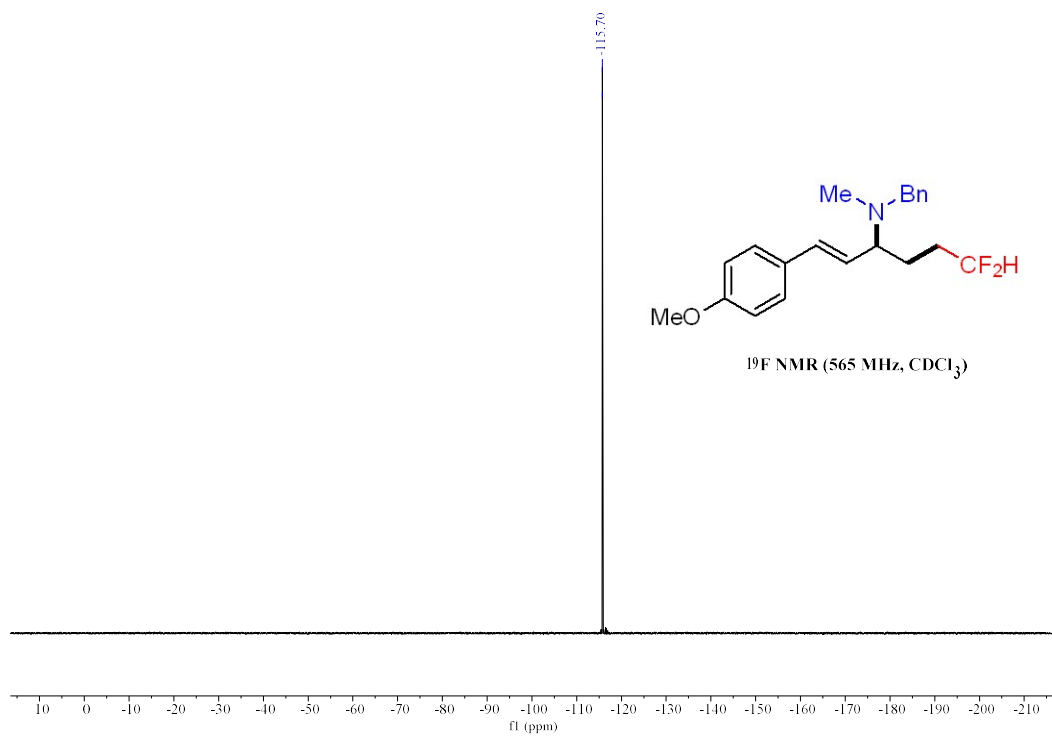

**(E)-4-(3-(benzyl(methyl)amino)-6,6-difluorohex-1-en-1-yl)-N,N-dimethylaniline**

**(4d)**

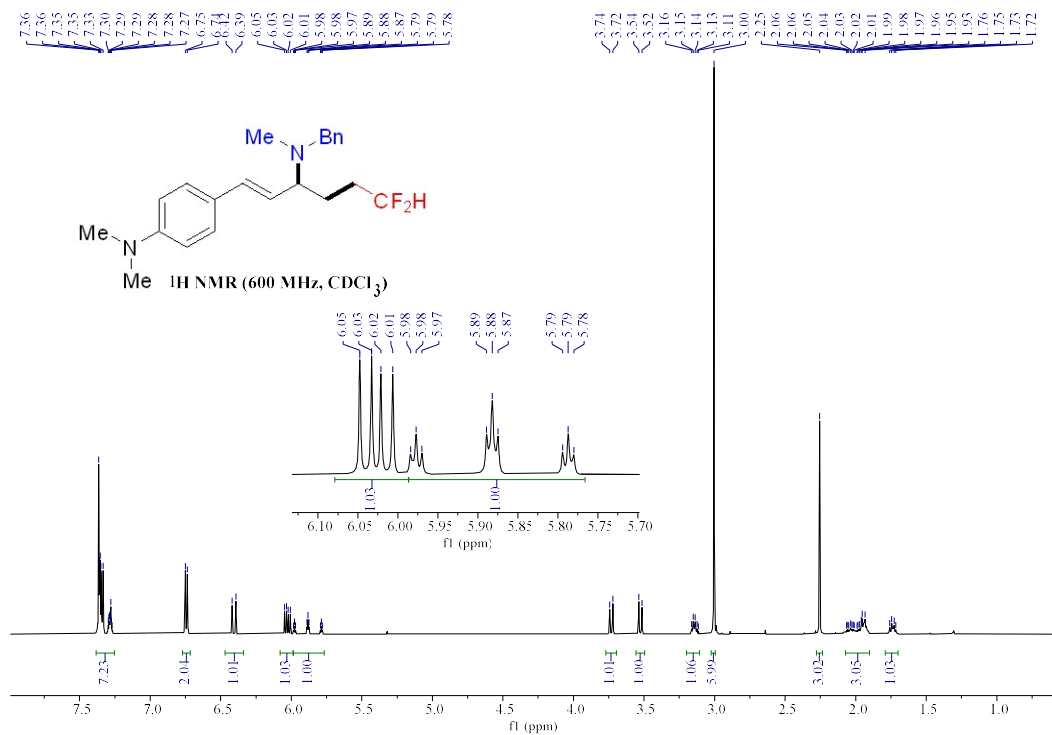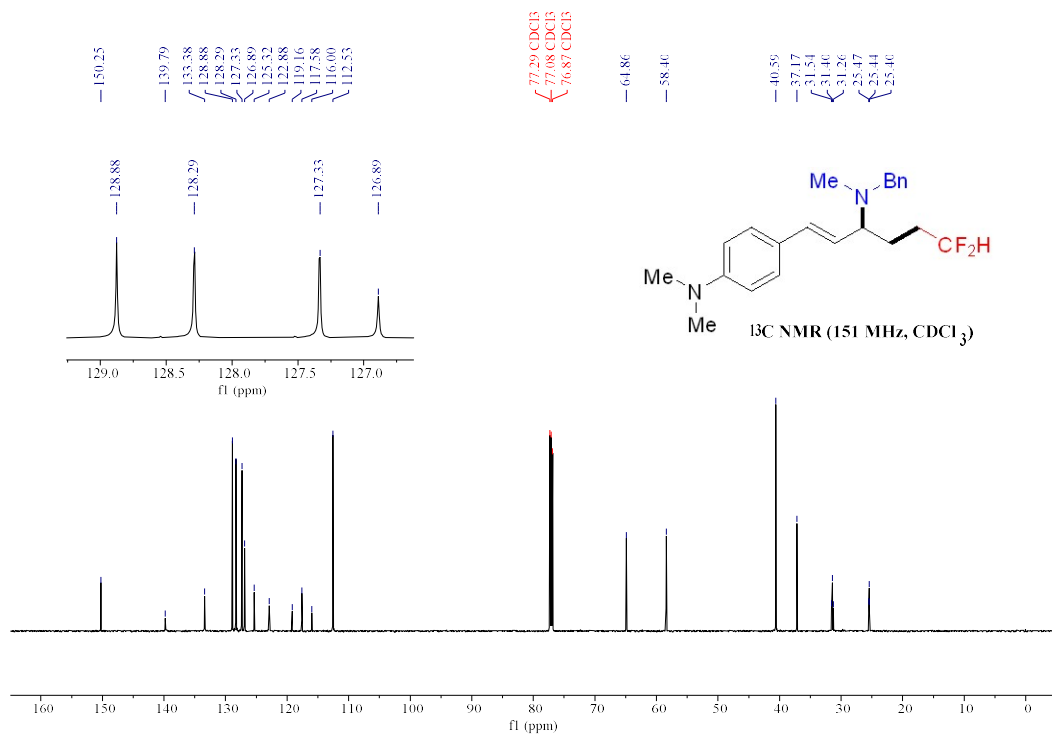

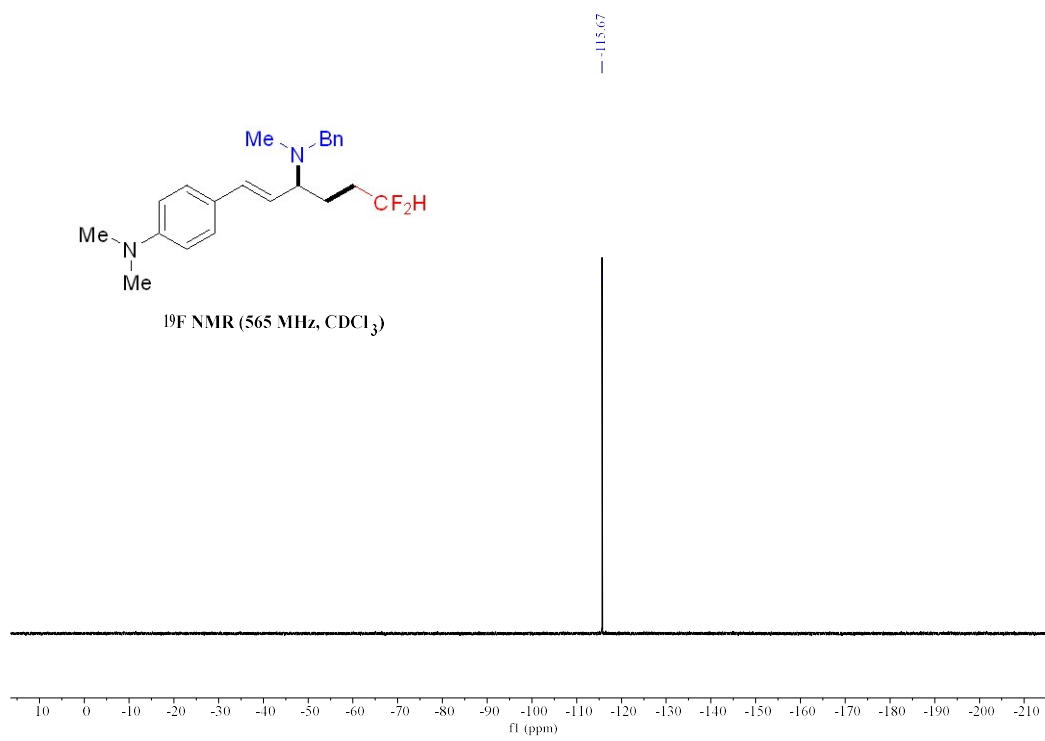

**(E)-N-Benzyl-6,6-difluoro-1-(4-fluorophenyl)-N-methylhex-1-en-3-amine (4e)**

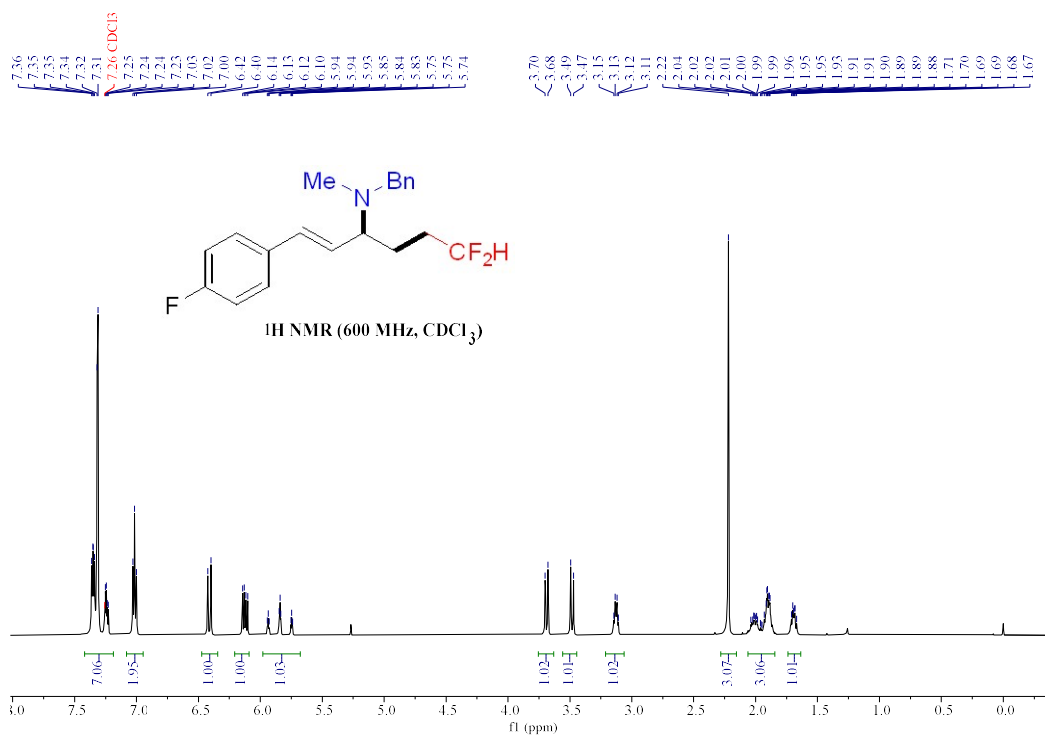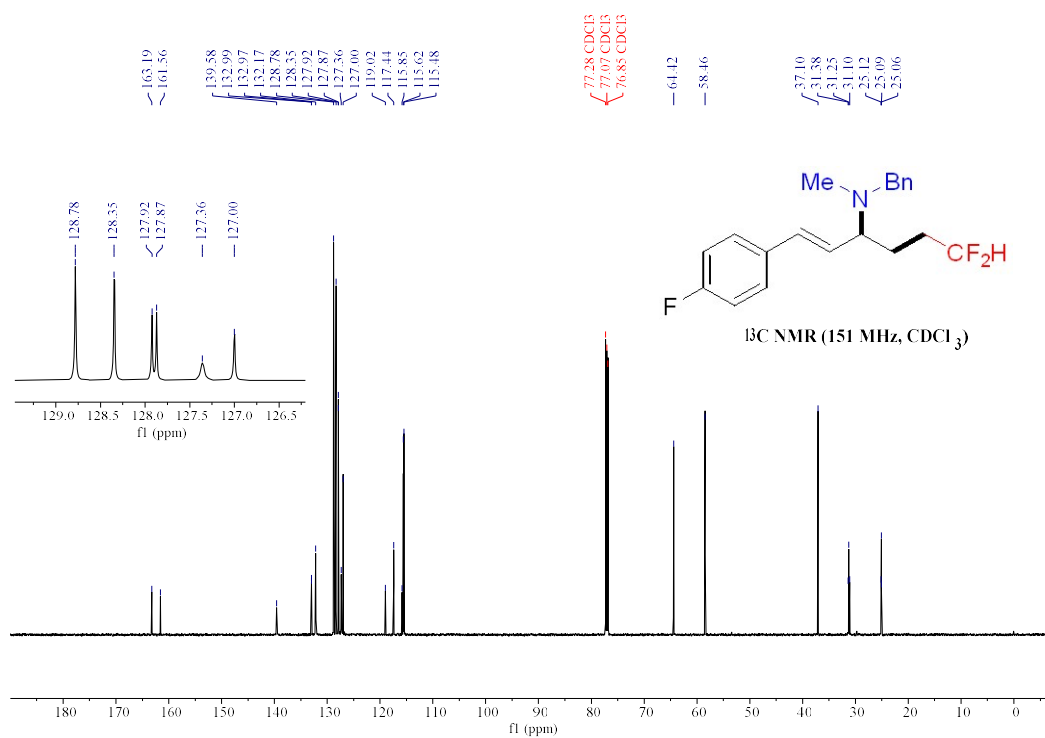

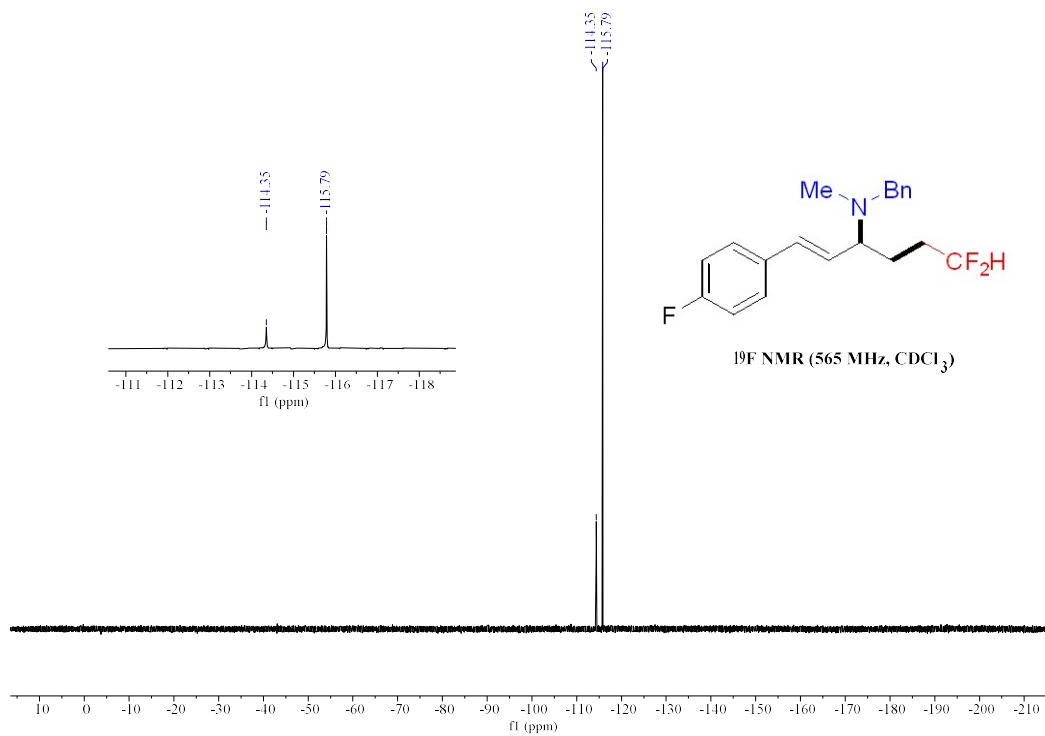





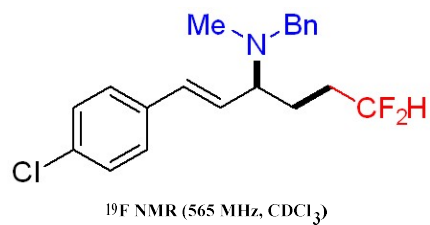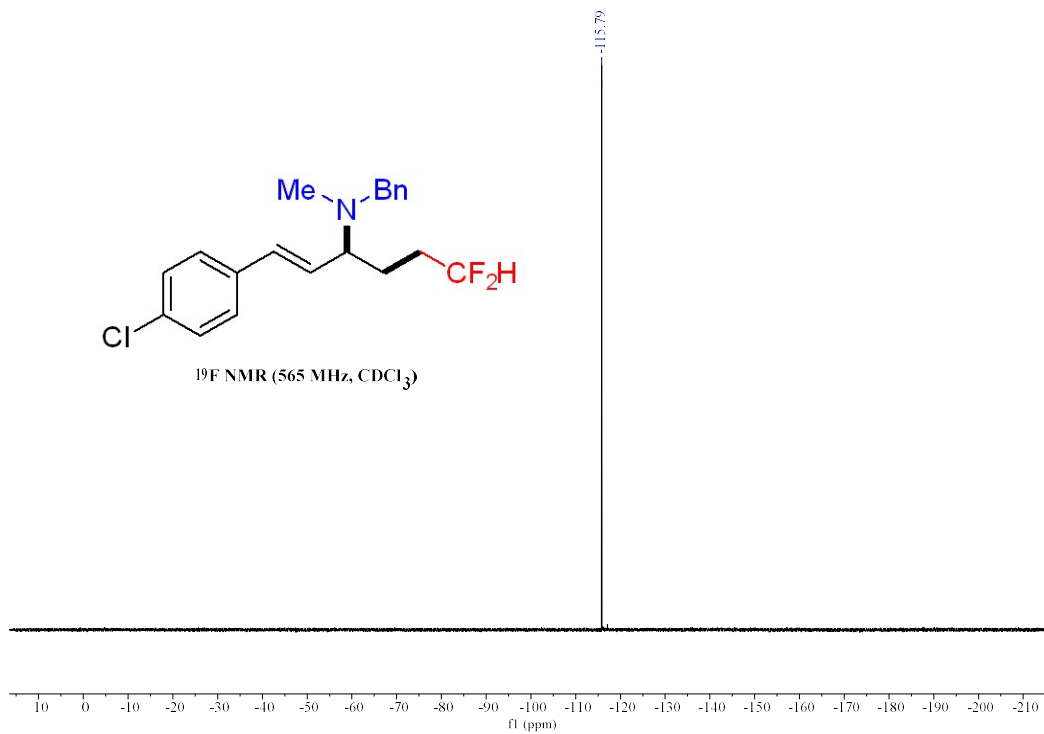

**(E)-N-Benzyl-1-(4-bromophenyl)-6,6-difluoro-N-methylhex-1-en-3-amine (4g)**

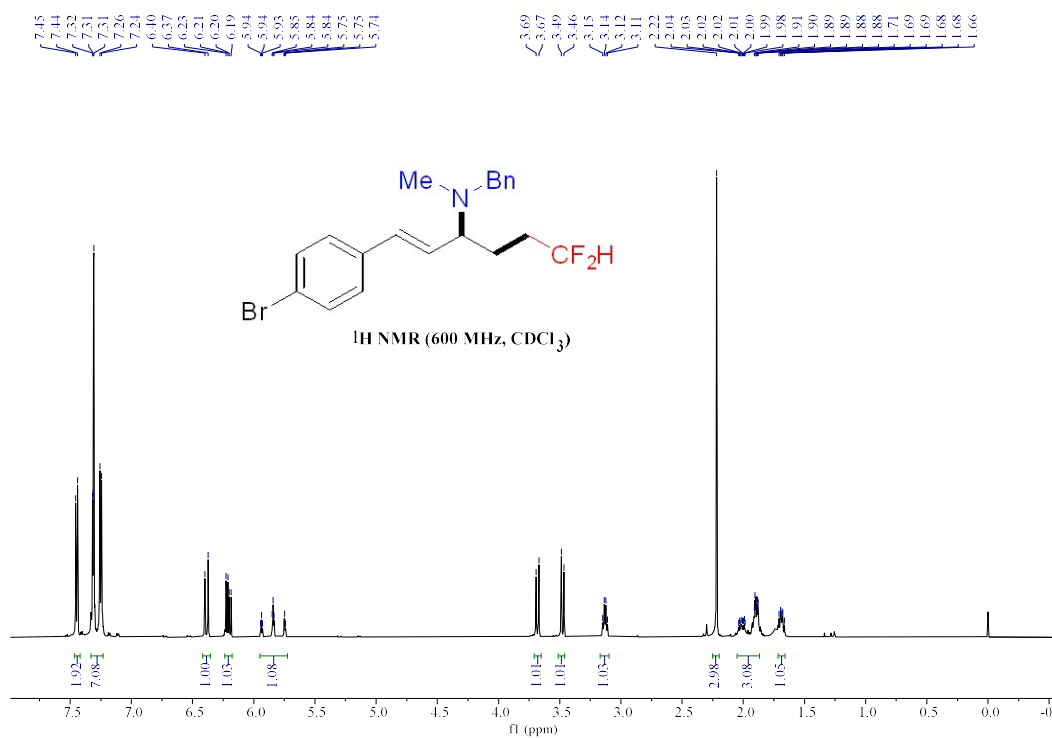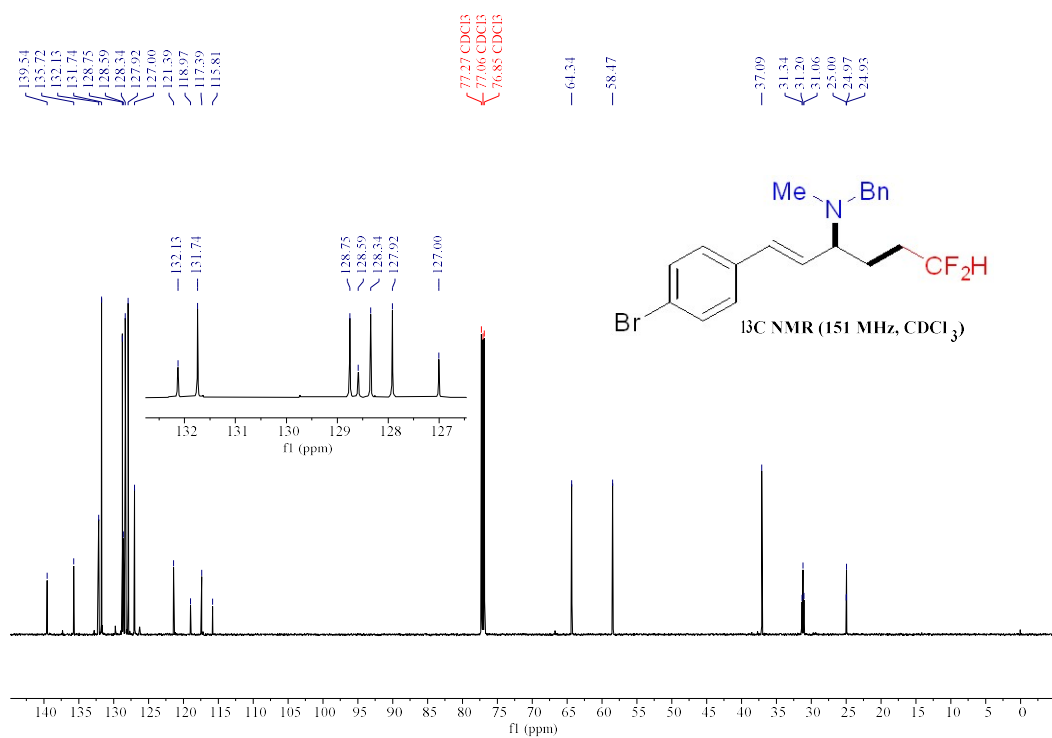

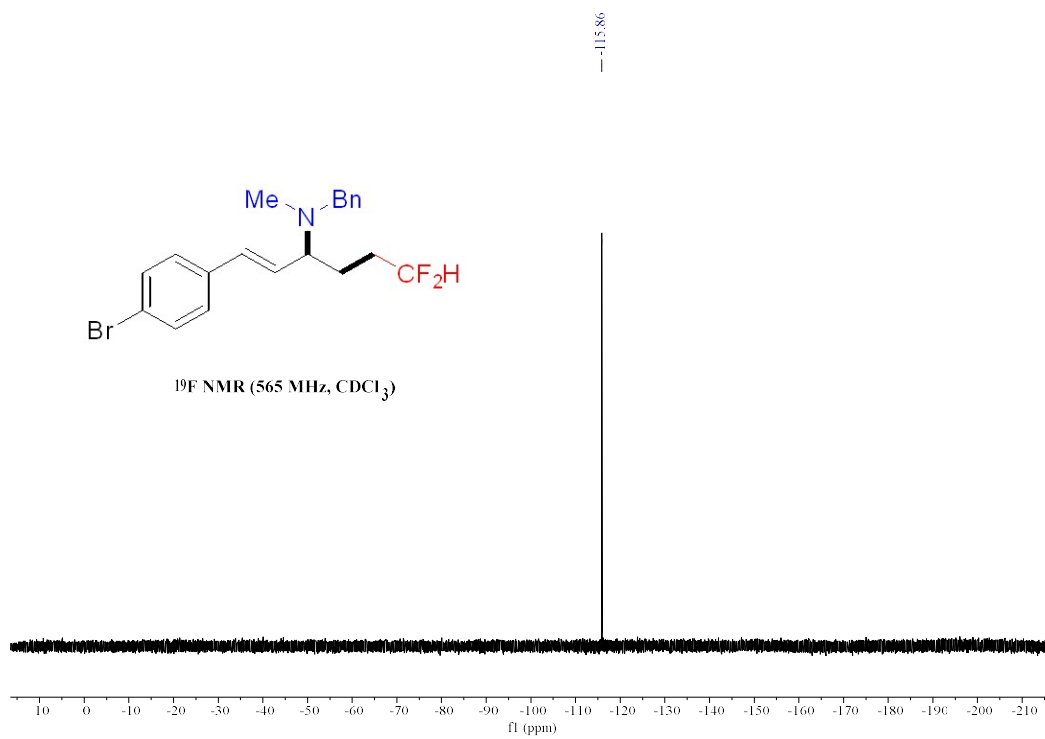

**(E)-N-Benzyl-6,6-difluoro-N-methyl-1-(4-(trifluoromethyl)phenyl)hex-1-en-3-amine (4h)**

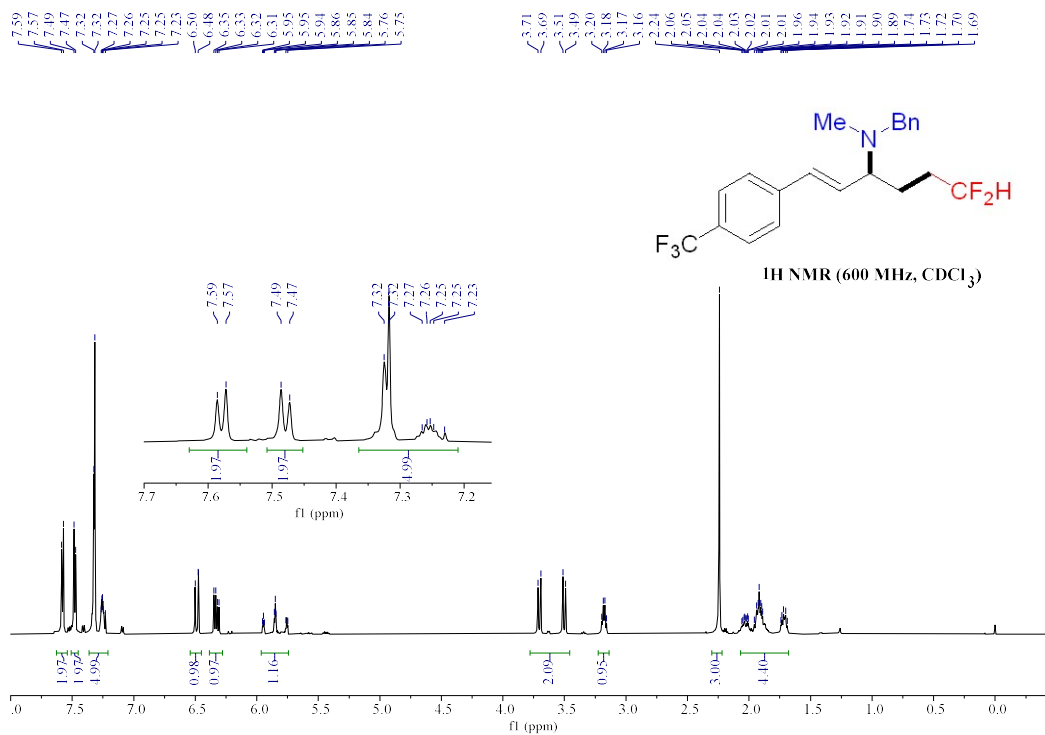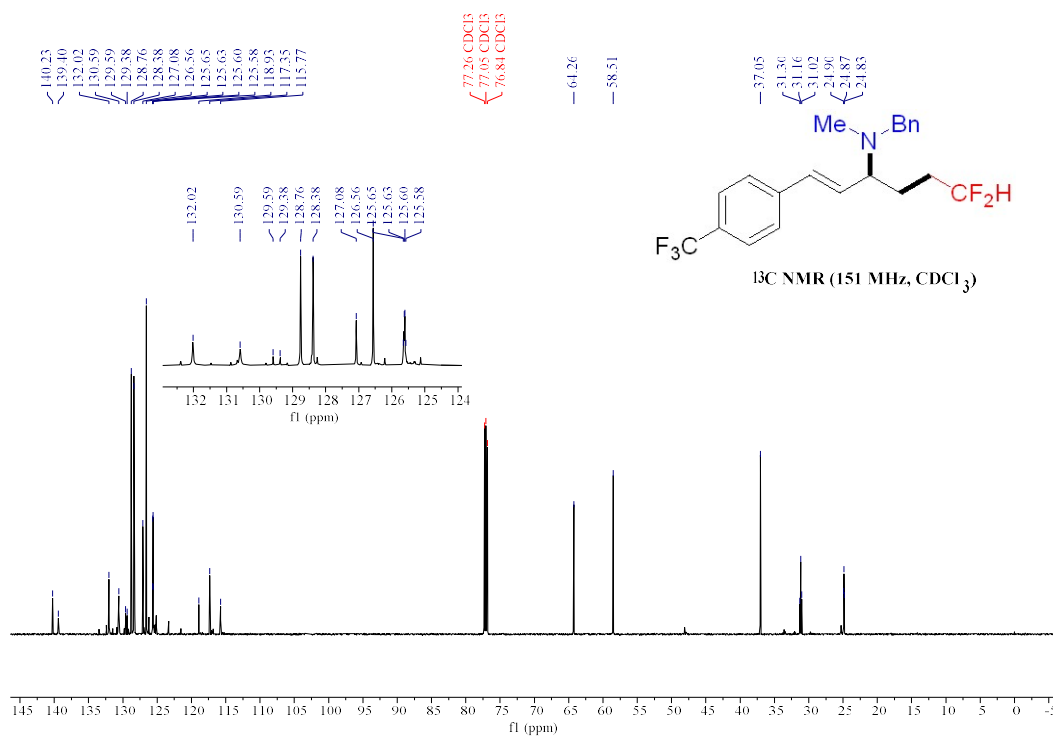

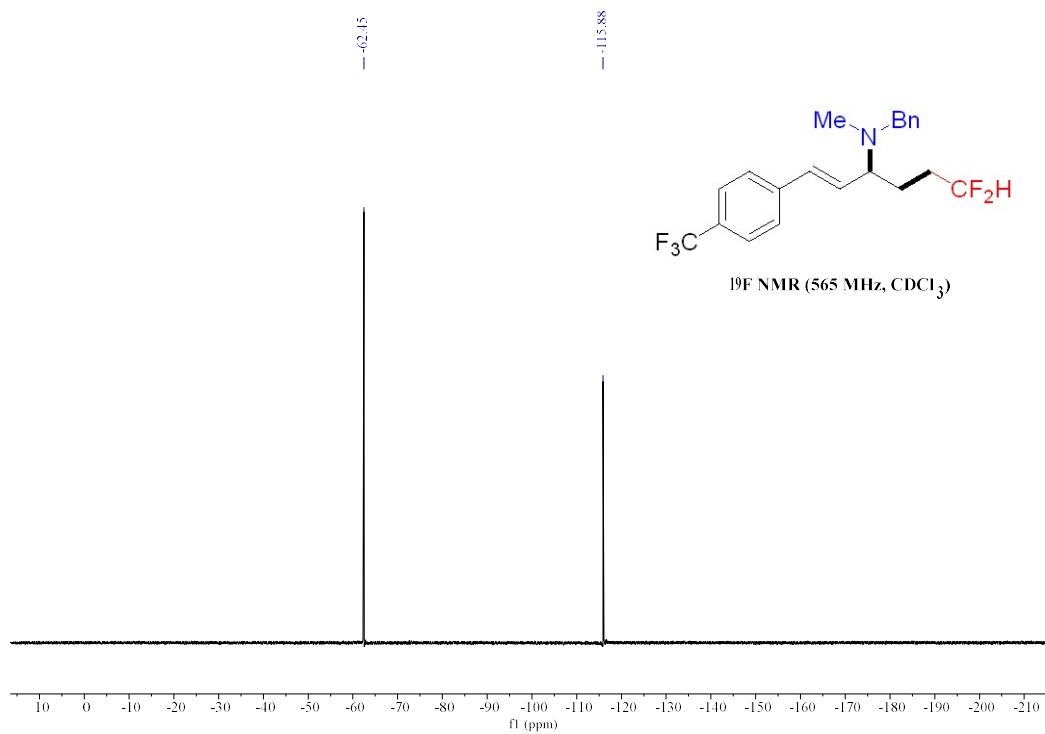

**Methyl (*E*)-4-(3-(benzyl(methyl)amino)-6,6-difluorohex-1-en-1-yl)benzoate (4i)**

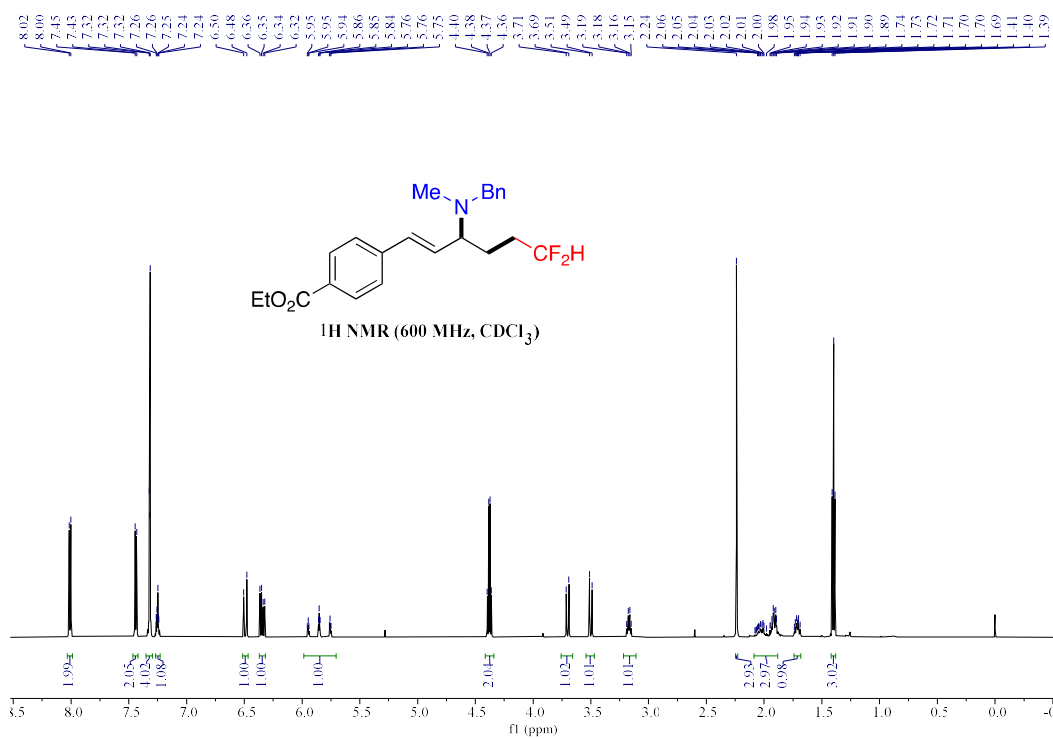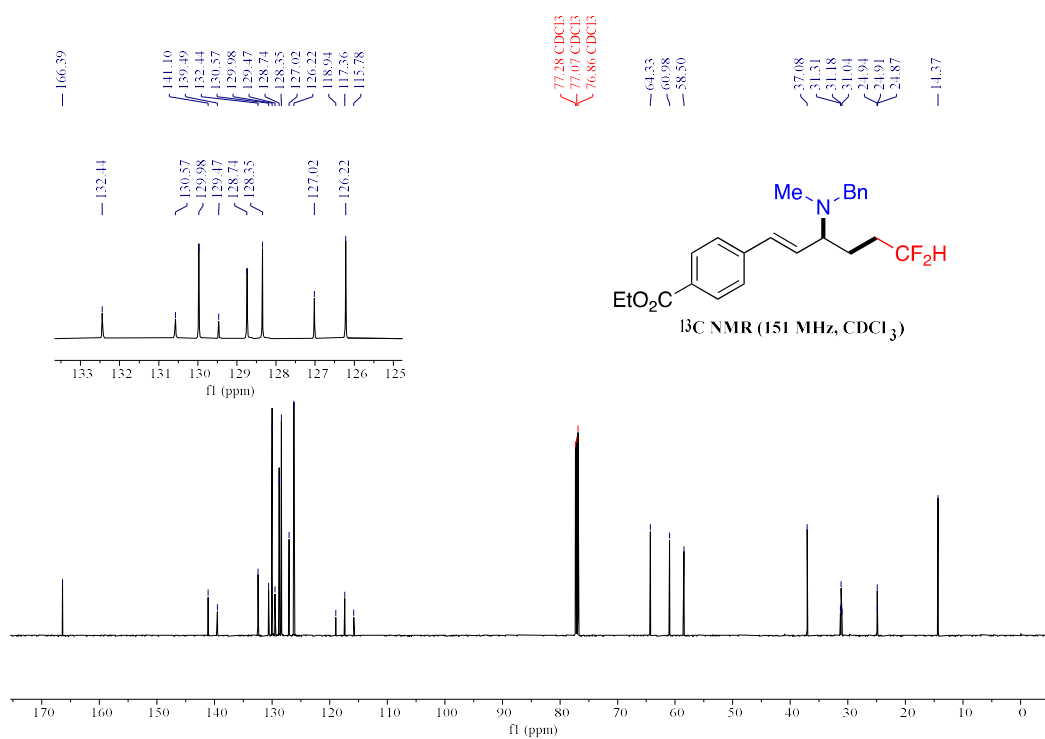

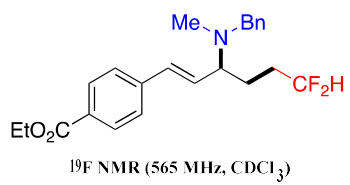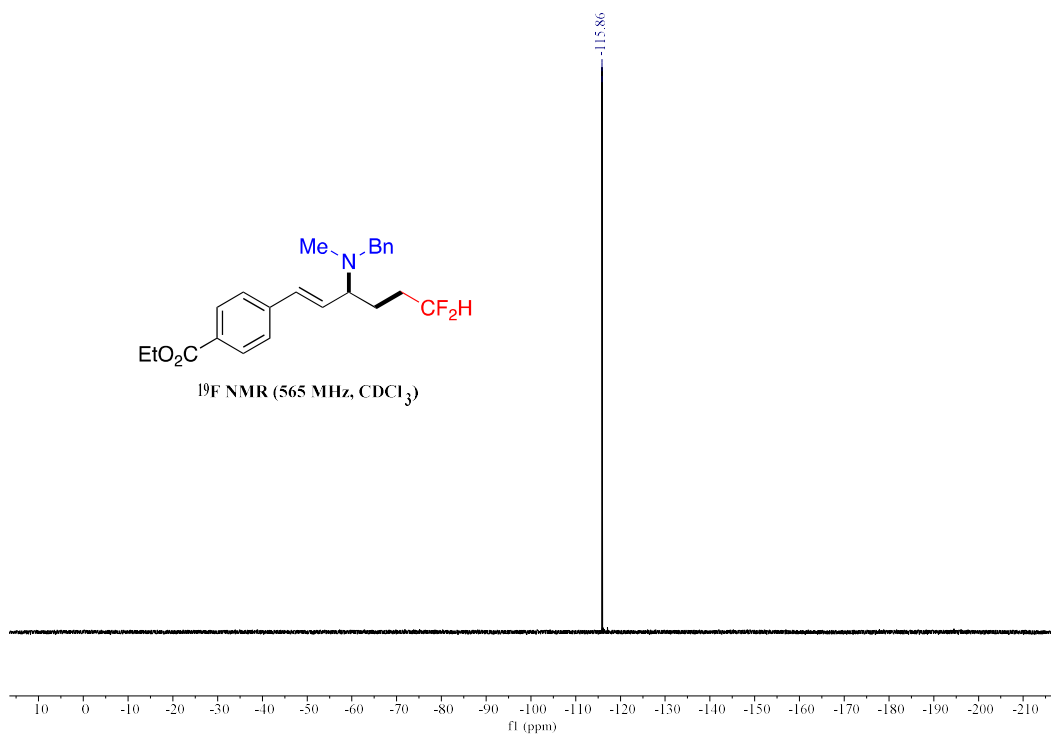





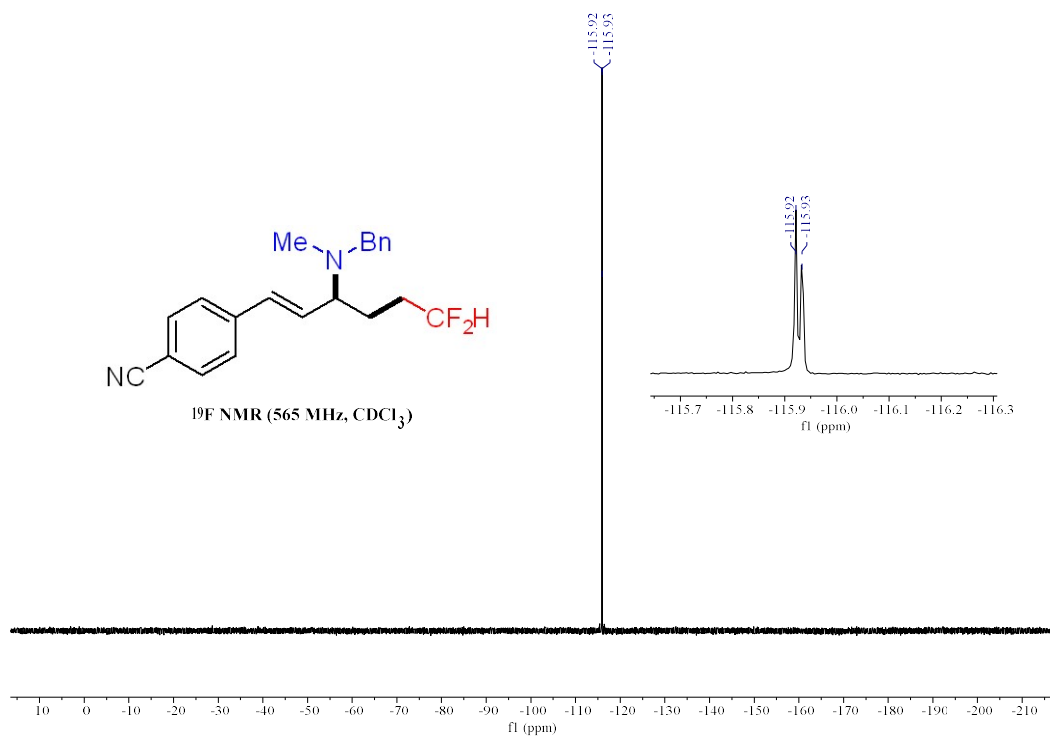

**(E)-N-Benzyl-6,6-difluoro-N-methyl-1-(*o*-tolyl)hex-1-en-3-amine (5j)**

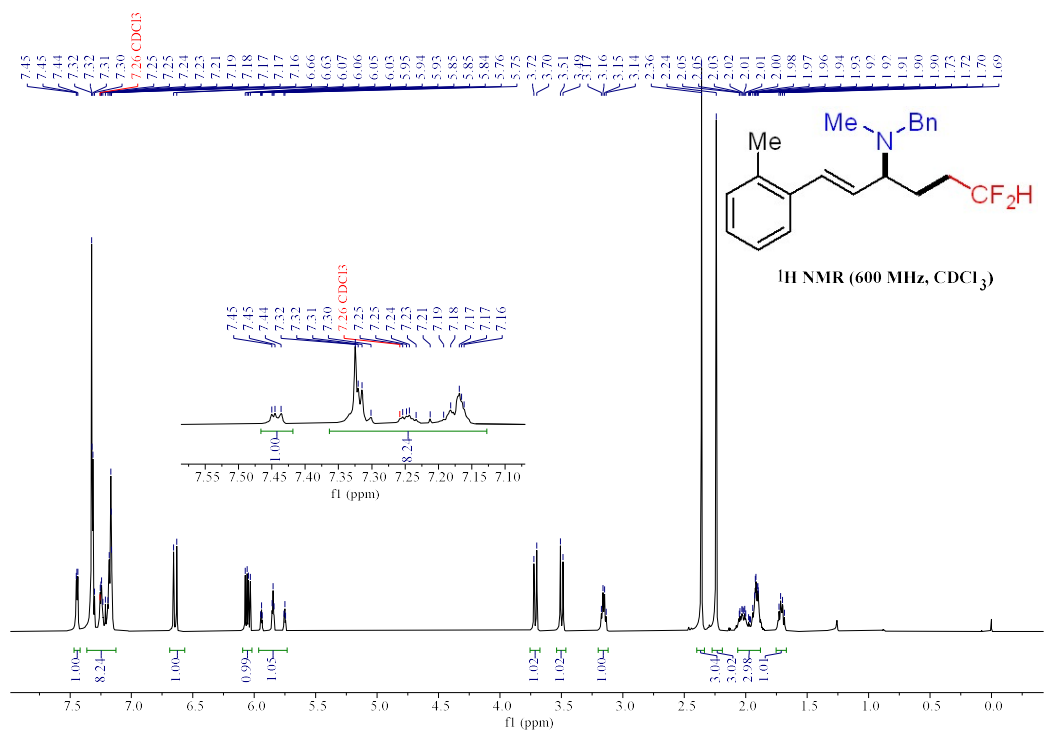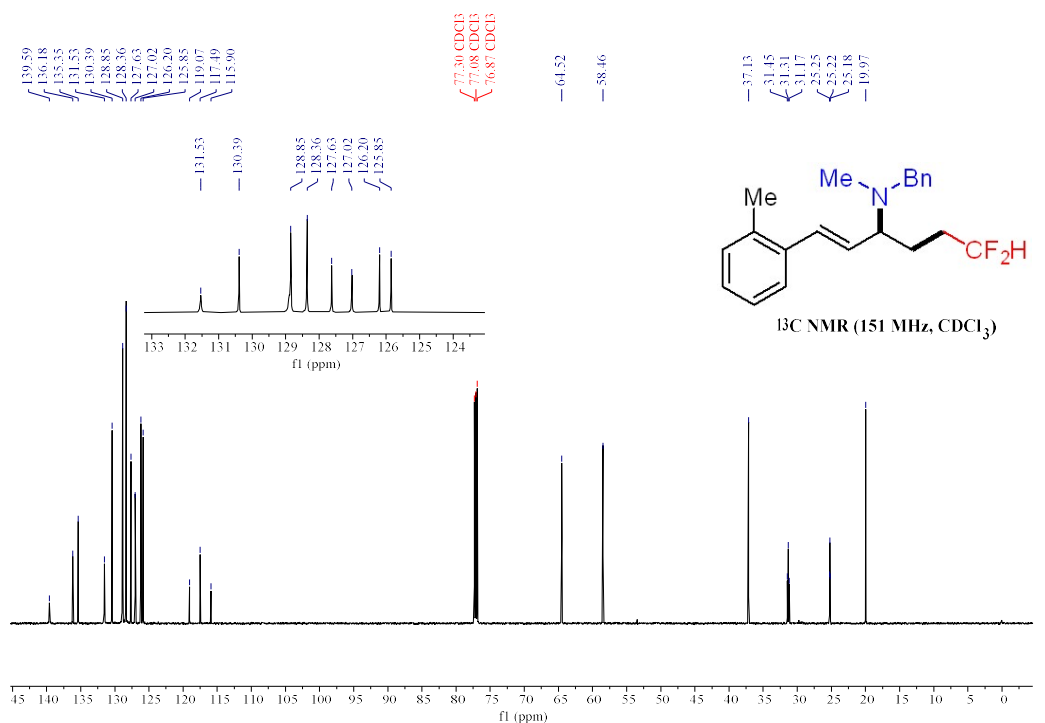

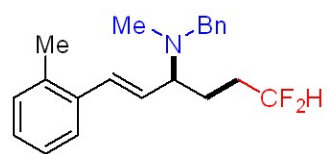

<sup>19</sup>F NMR (565 MHz, CDCl<sub>3</sub>)

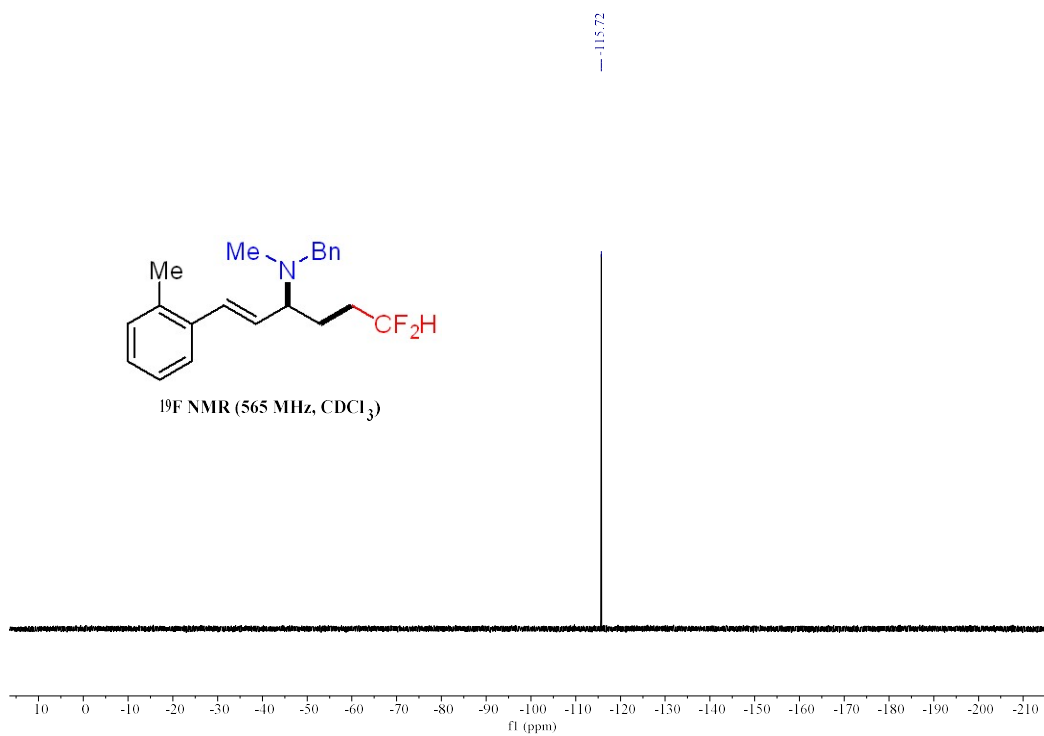

**(E)-1-([1,1'-Biphenyl]-2-yl)-N-benzyl-6,6-difluoro-N-methylhex-1-en-3-amine (4l)**

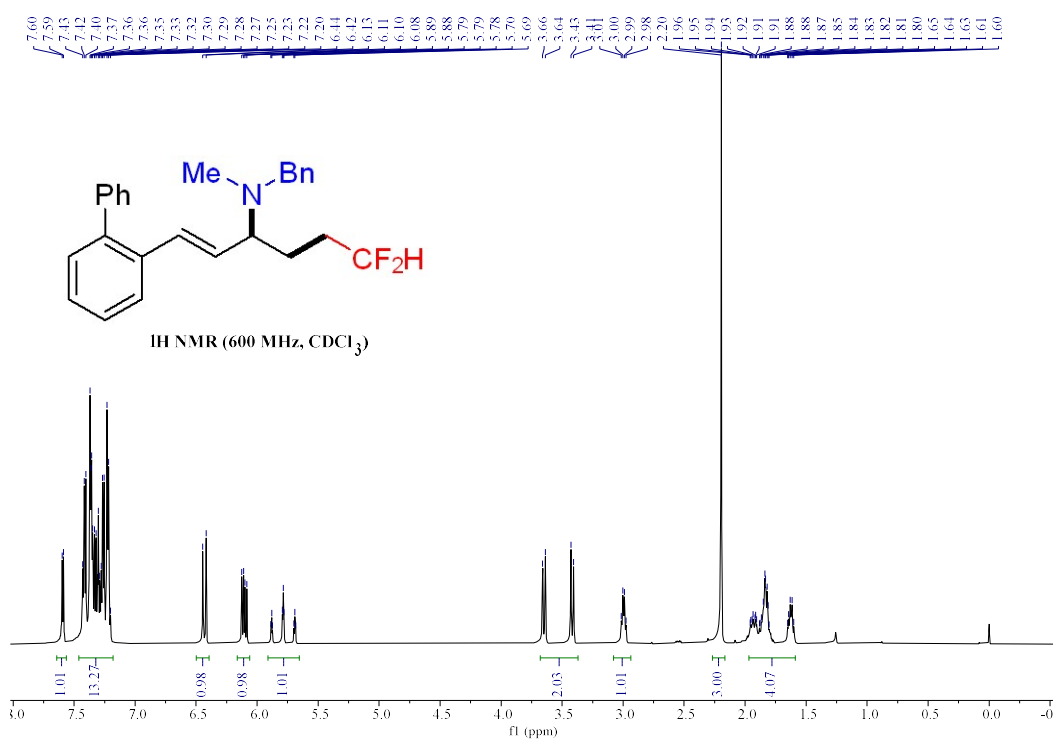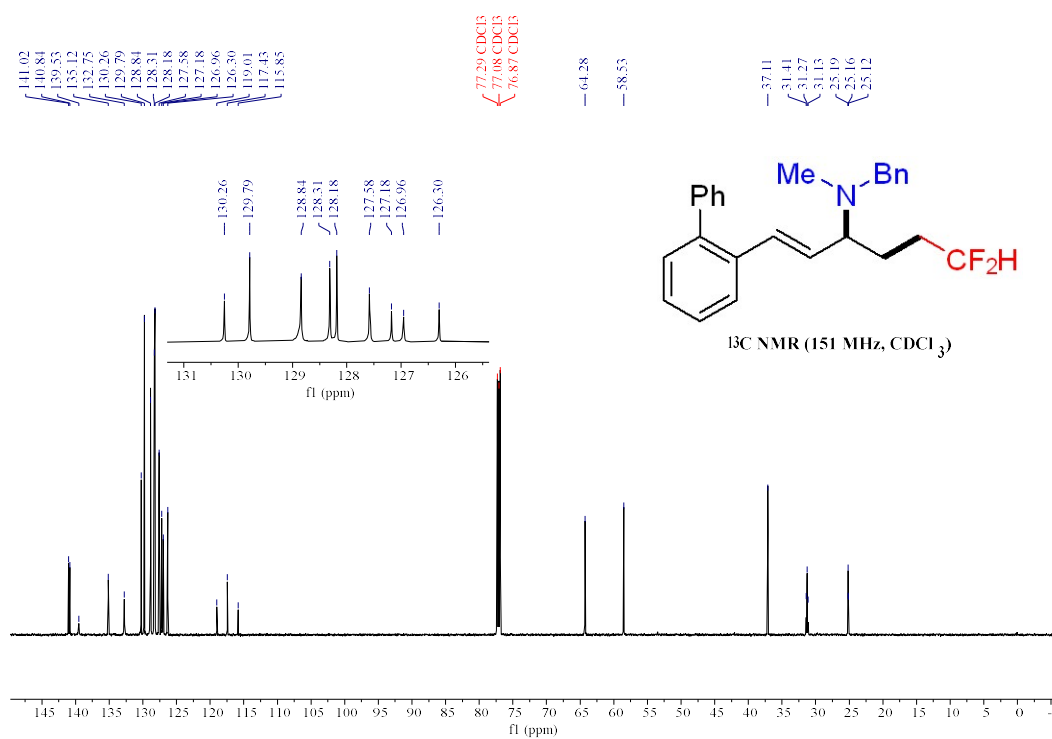

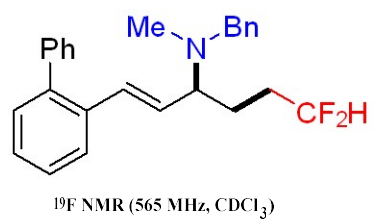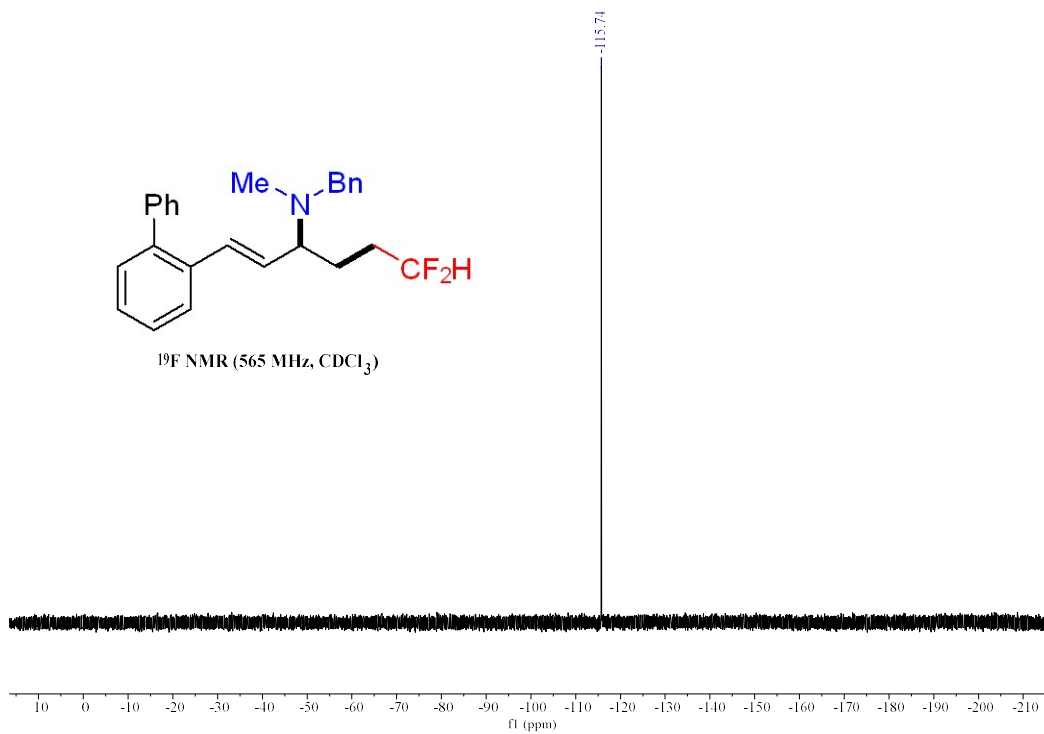

**(E)-N-Benzyl-1-(2,3-dihydrobenzofuran-5-yl)-6,6-difluoro-N-methylhex-1-en-3-amine (4m)**

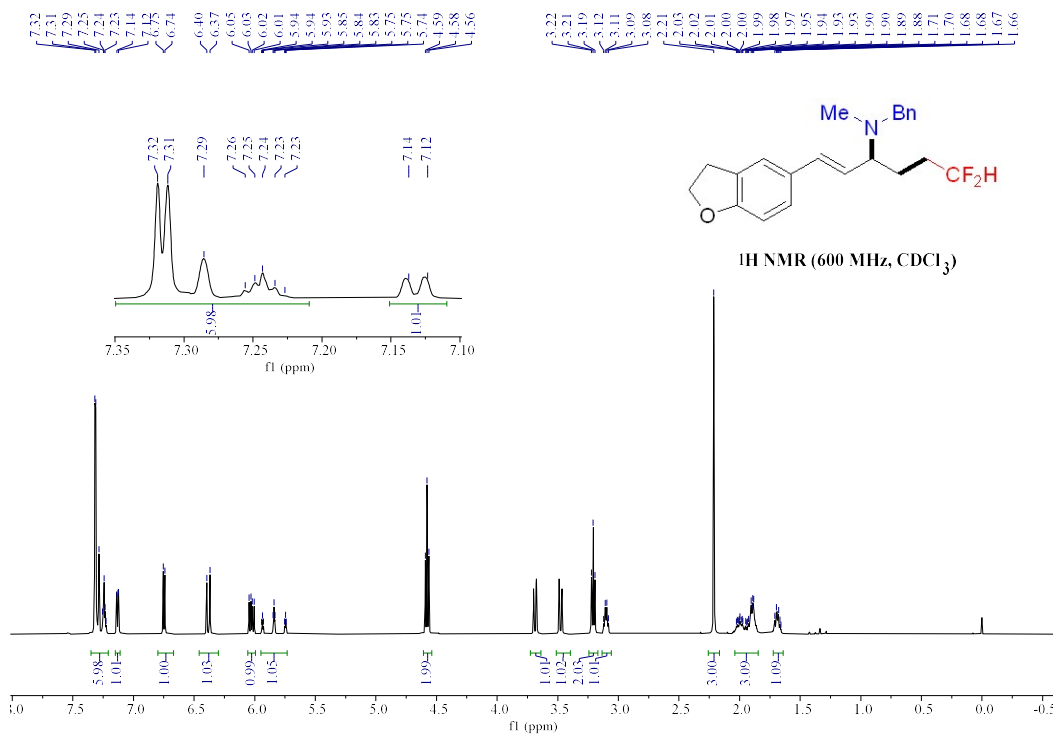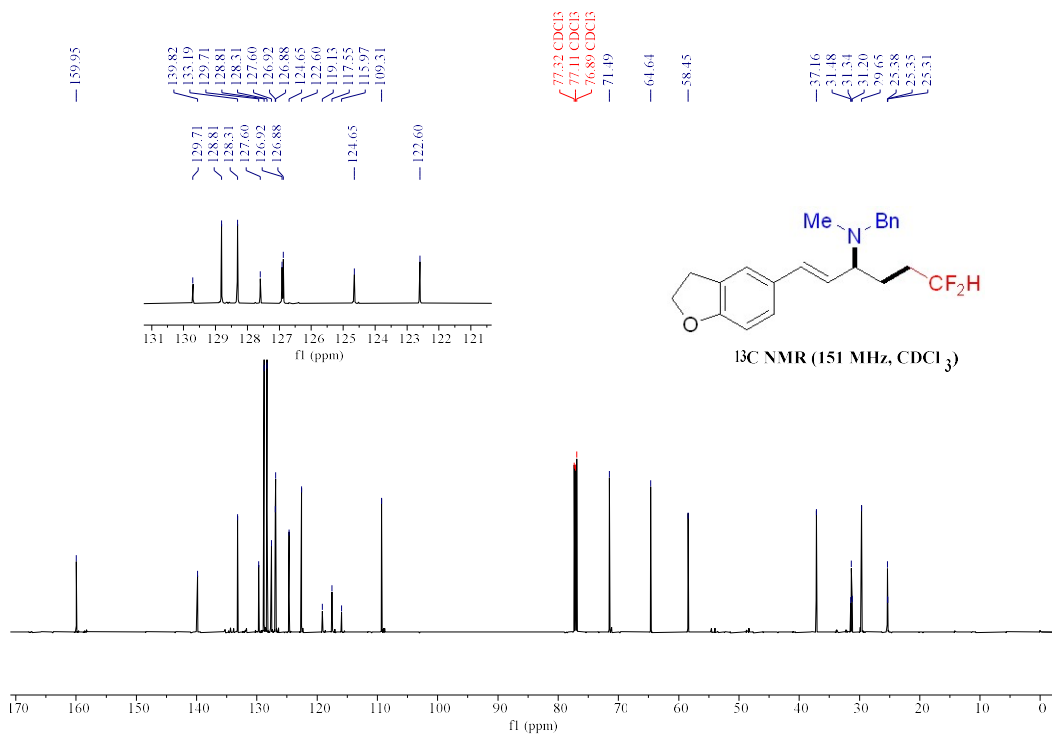

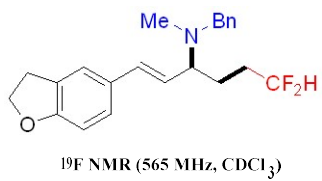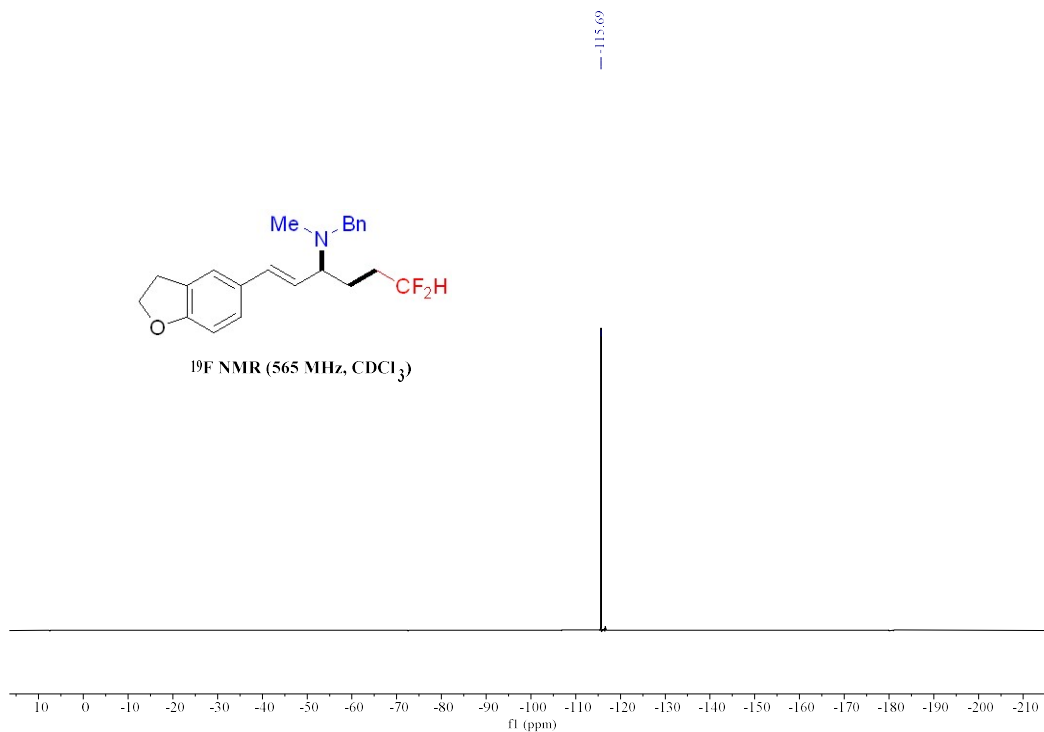





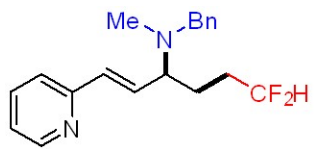

<sup>19</sup>F NMR (565 MHz, CDCl<sub>3</sub>)

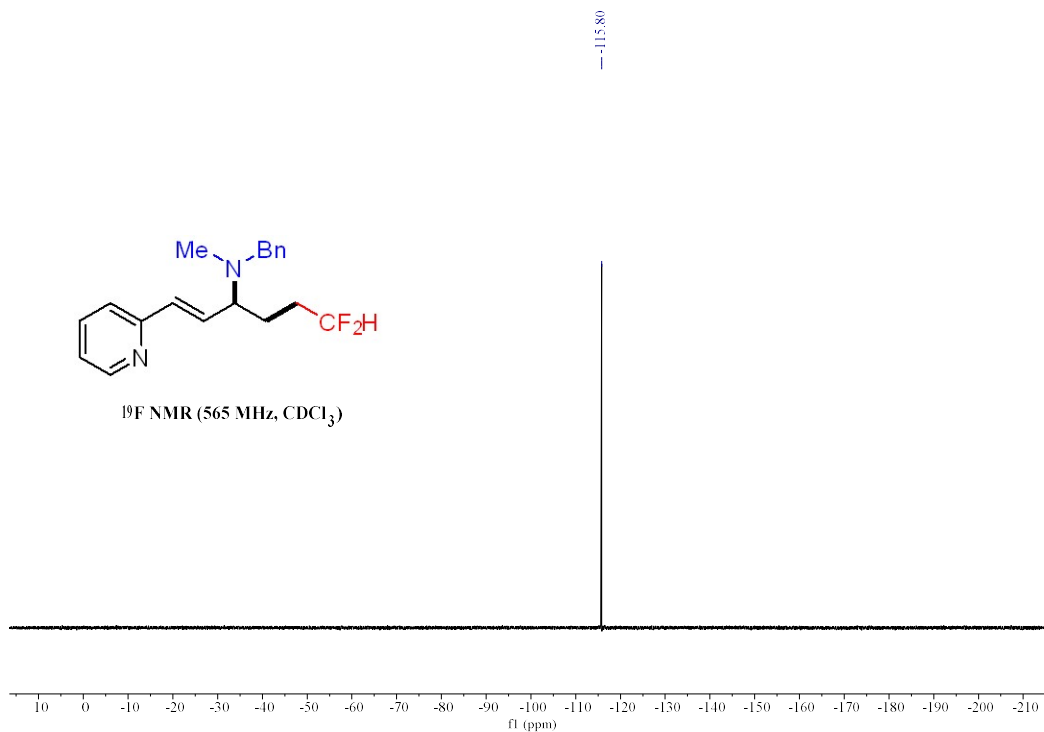

**(E)-N-Benzyl-6,6-difluoro-N-methyl-1-(pyridin-3-yl)hex-1-en-3-amine (4o)**

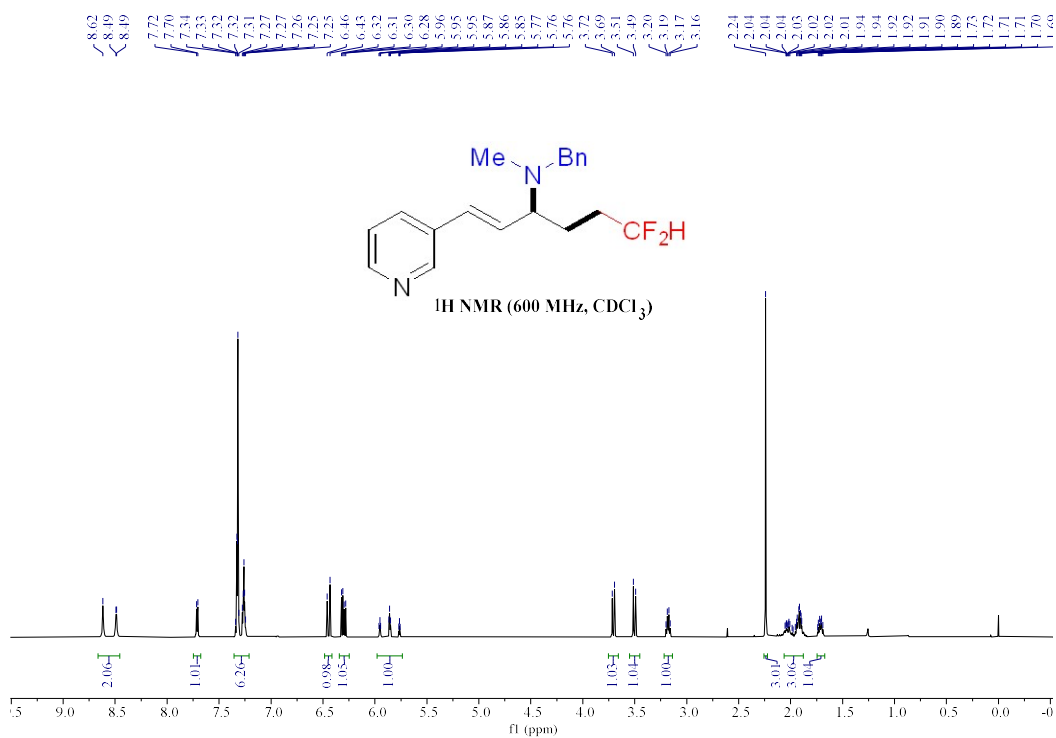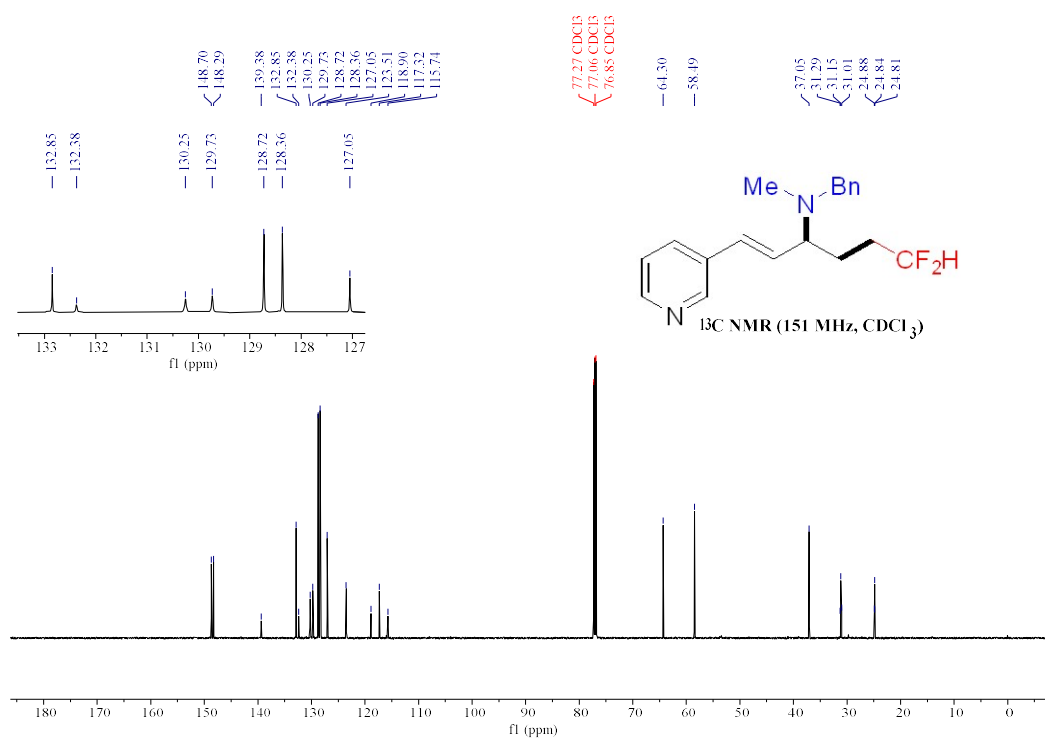

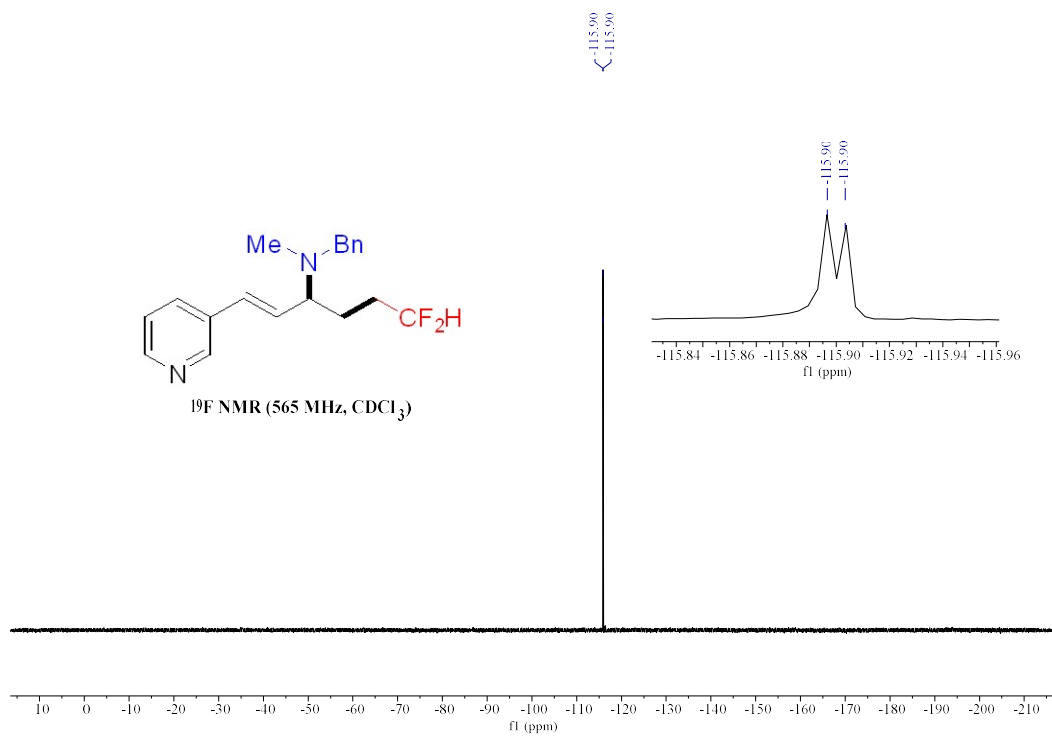

**(E)-1-(Benzo[b]thiophen-3-yl)-N-benzyl-6,6-difluoro-N-methylhex-1-en-3-amine**

**(4p)**

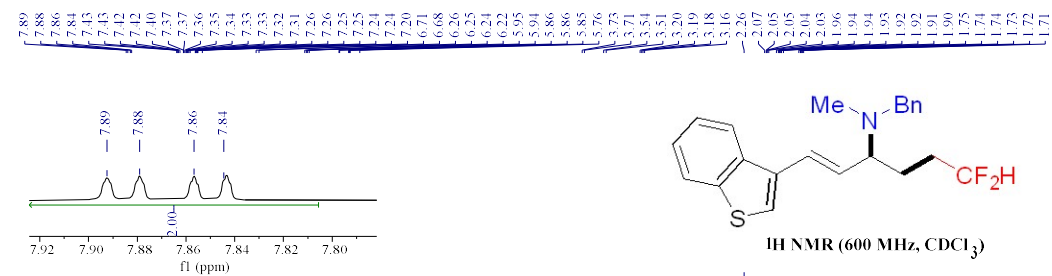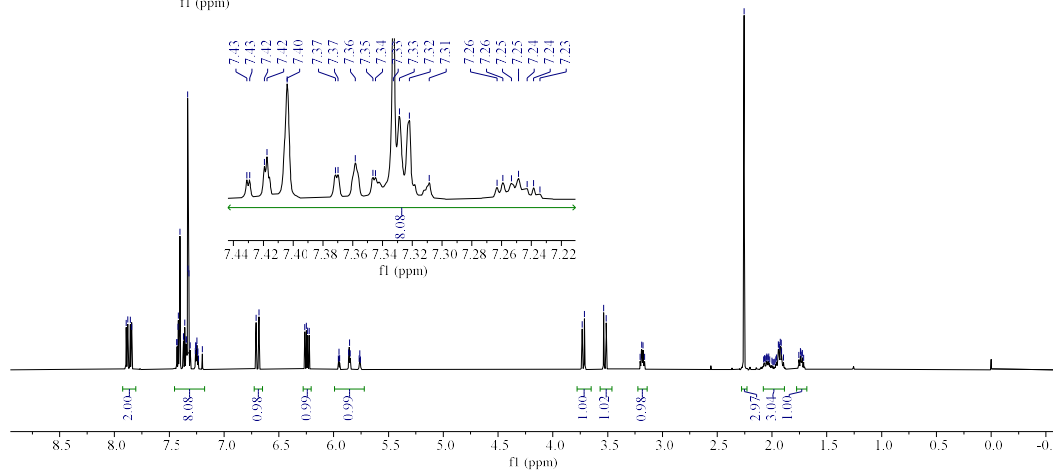

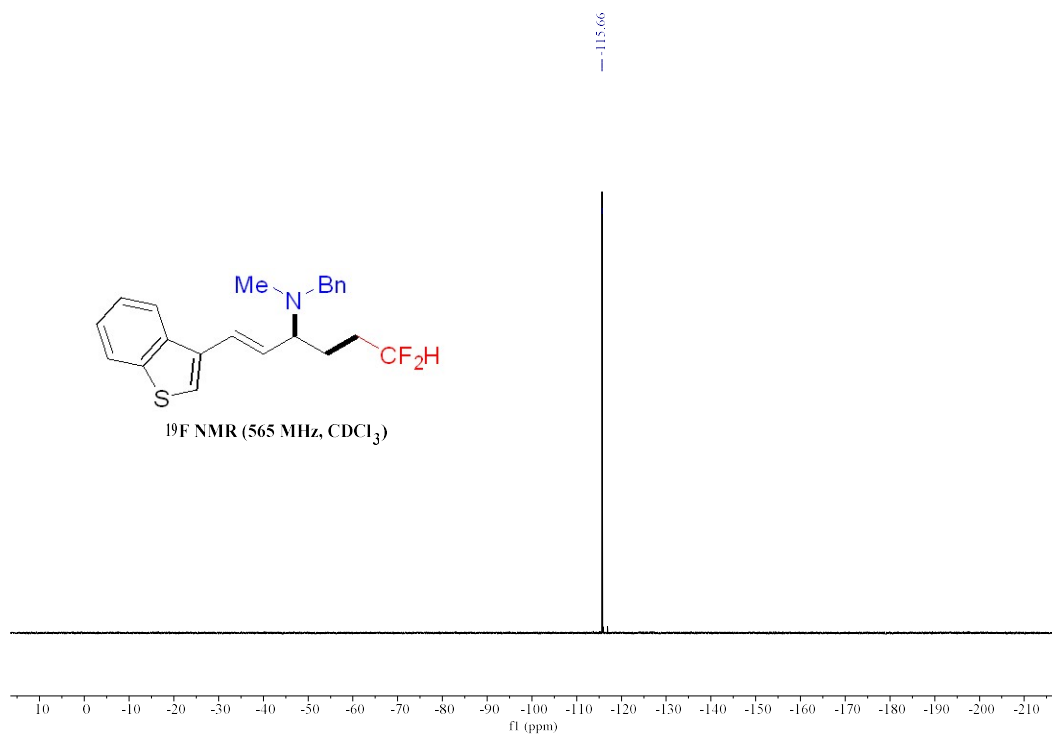

**(E)-N-Benzyl-6,6-difluoro-N-methyl-1-(1-methyl-1H-indol-3-yl)hex-1-en-3-amine (4q)**

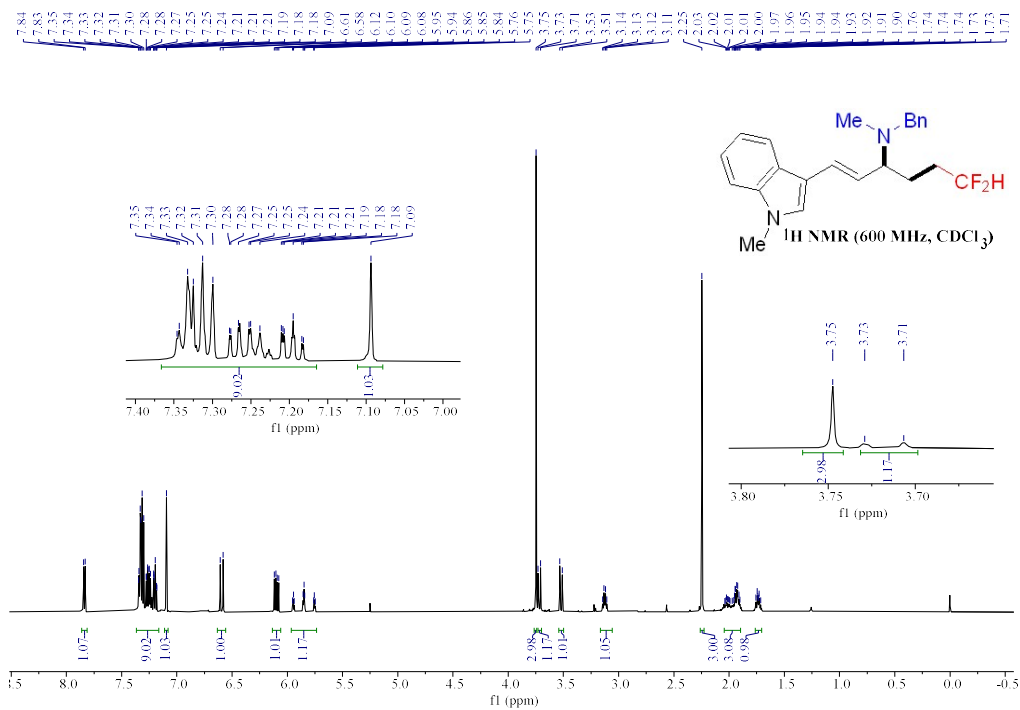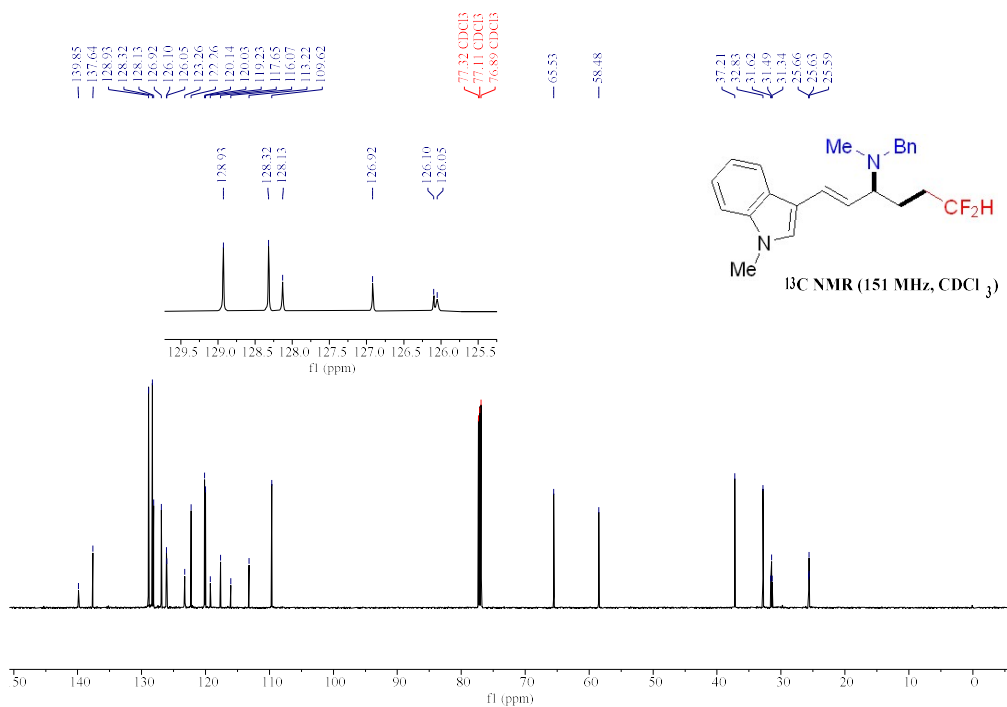

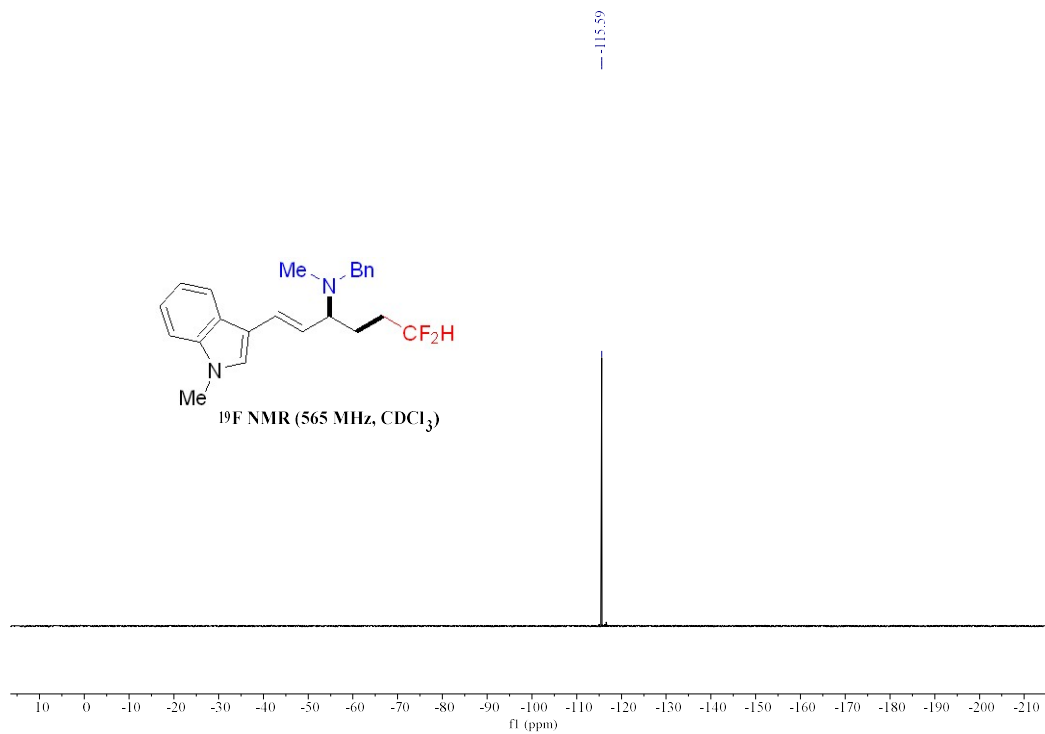



**(E)-N-Benzyl-6,6-difluoro-N-methyl-1-ferrocenylpent-1-en-3-amine (4r)**

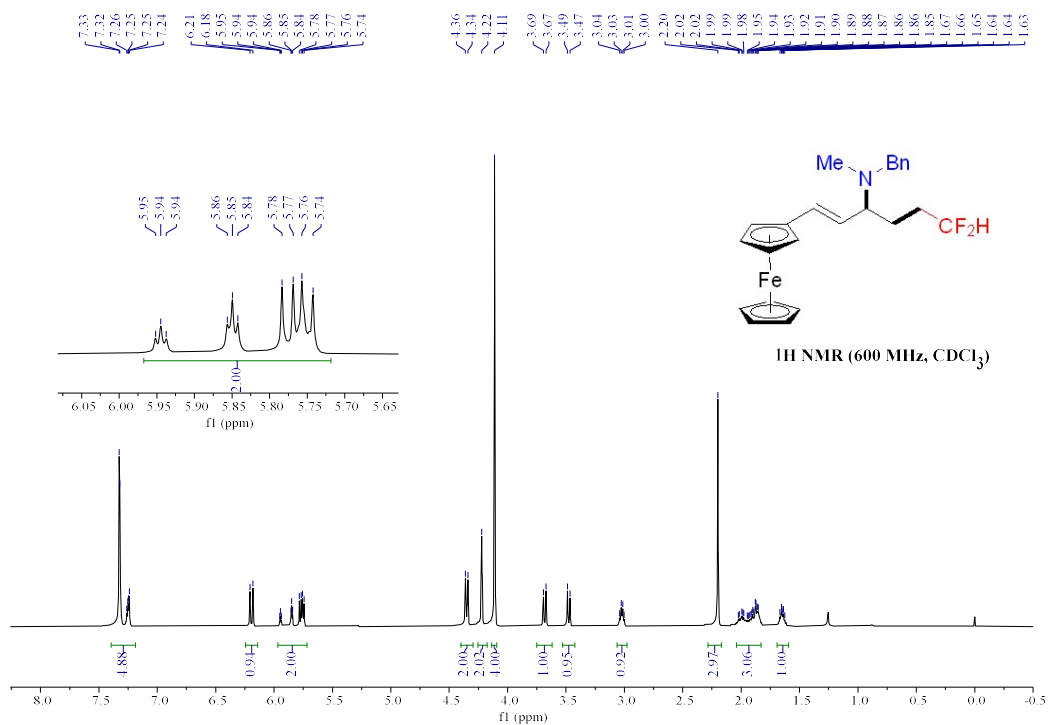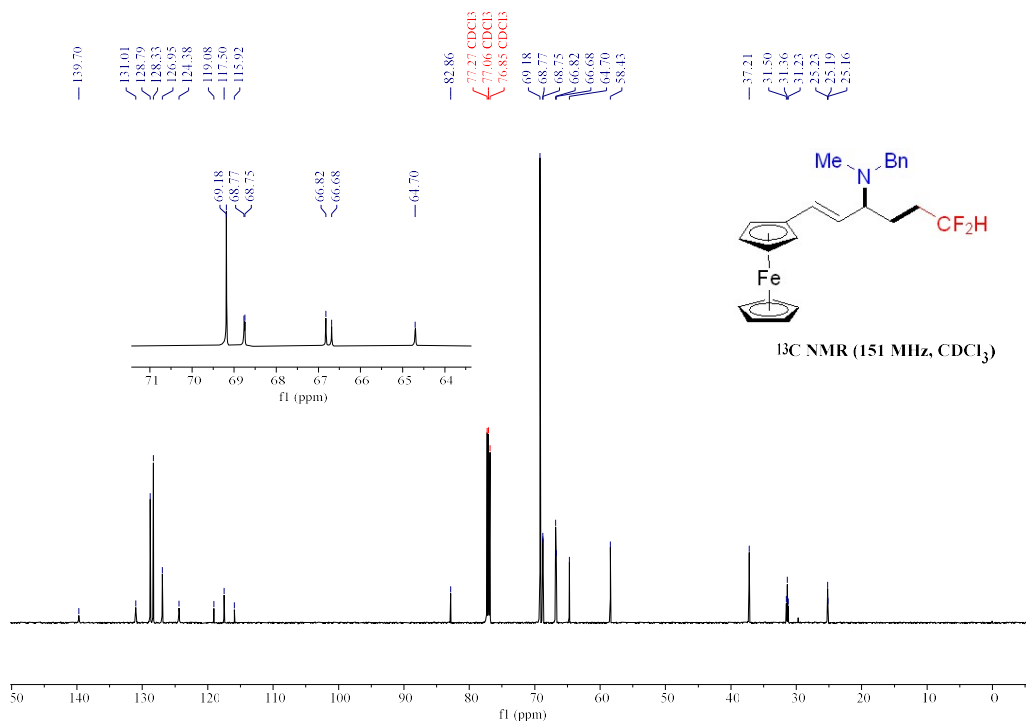

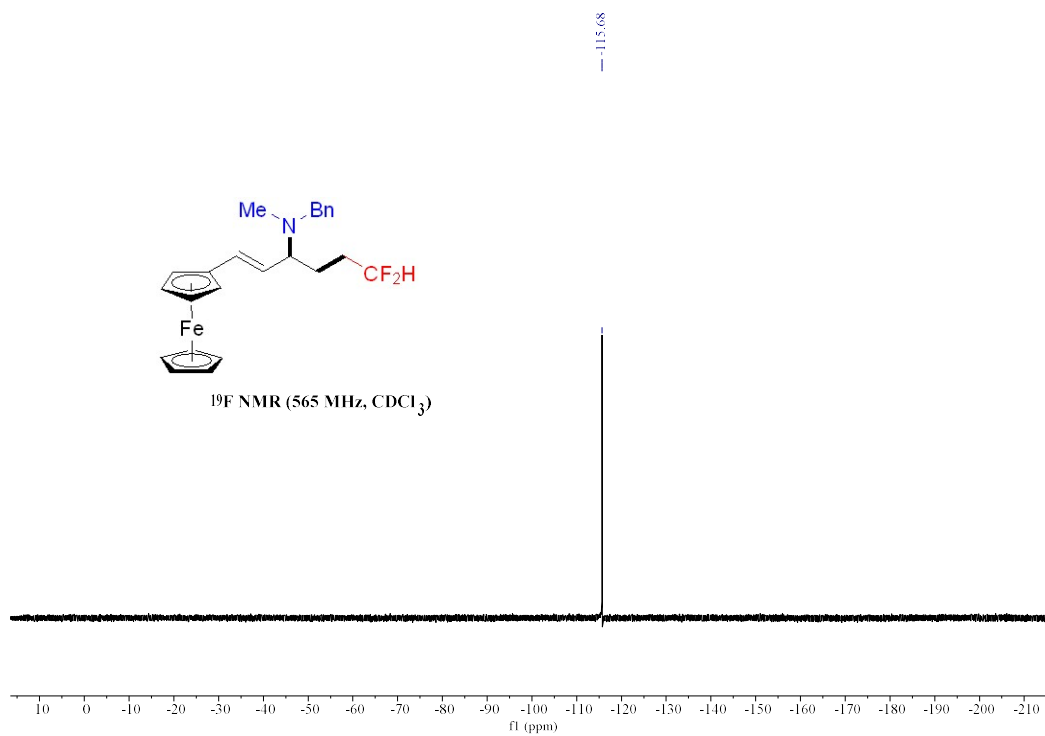

**(E)-N-Benzyl-6,6-difluoro-N,2-dimethyl-1-phenylhex-1-en-3-amine (4s)**

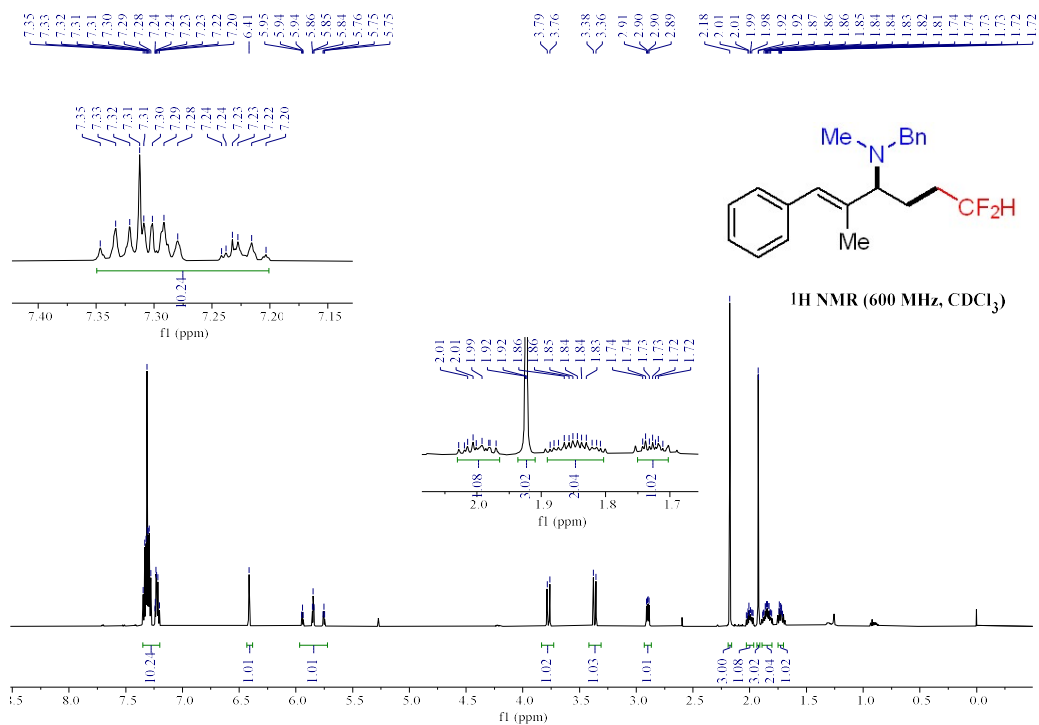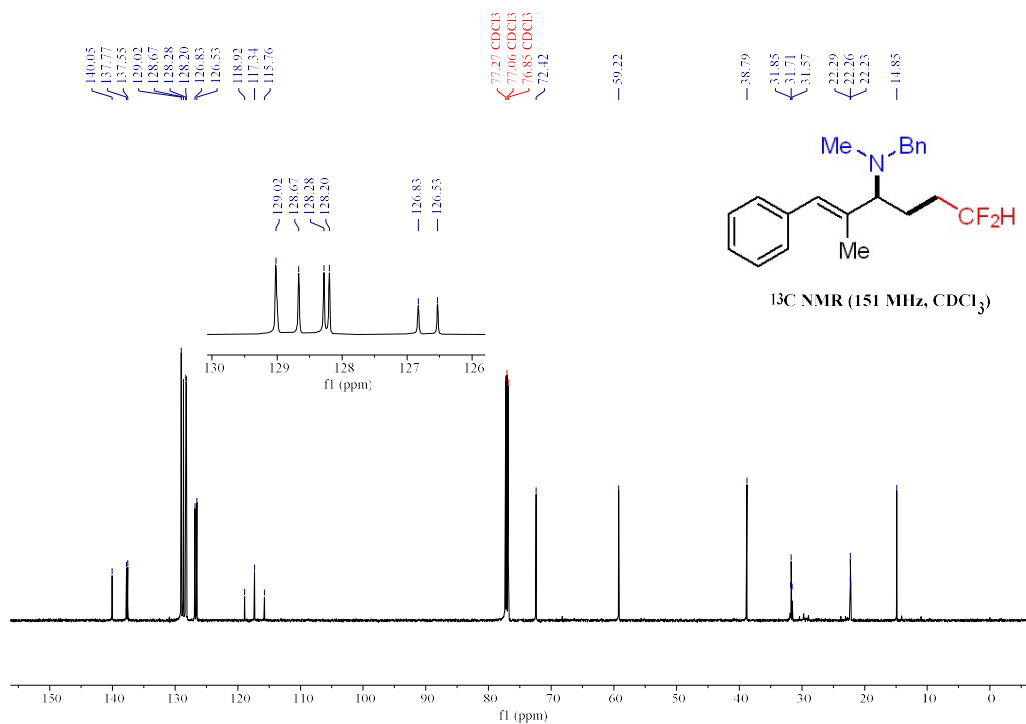

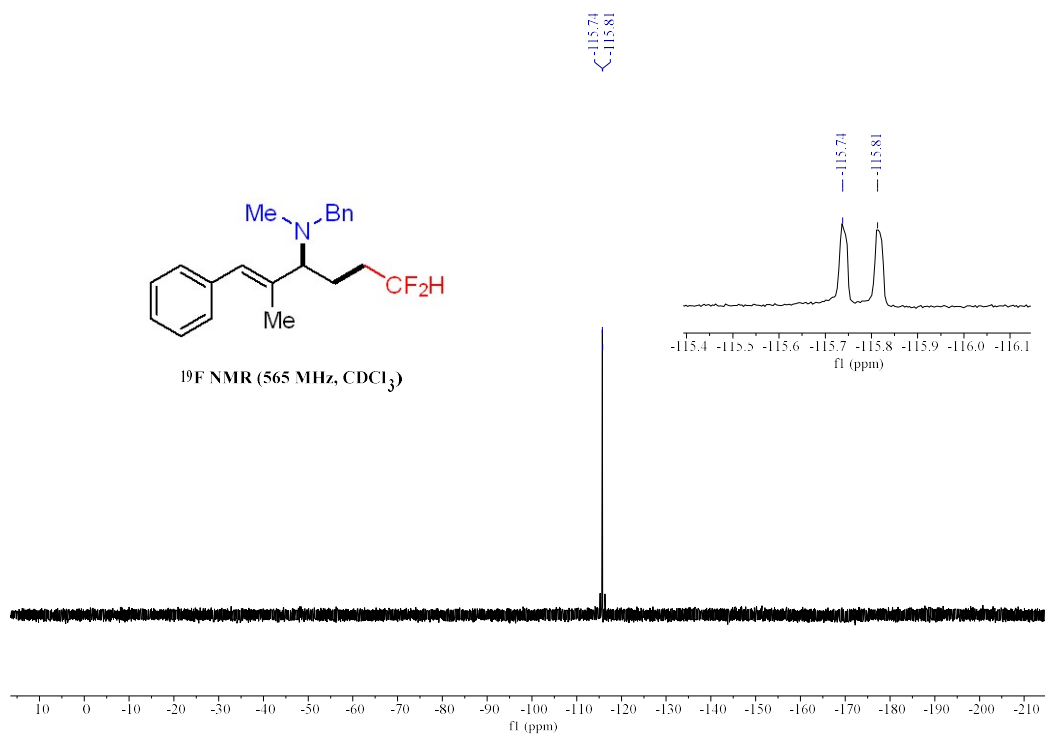

**(E)-N-Benzyl-1,1-difluoro-N-methyl-8-phenyloct-5-en-4-amine (4t)**

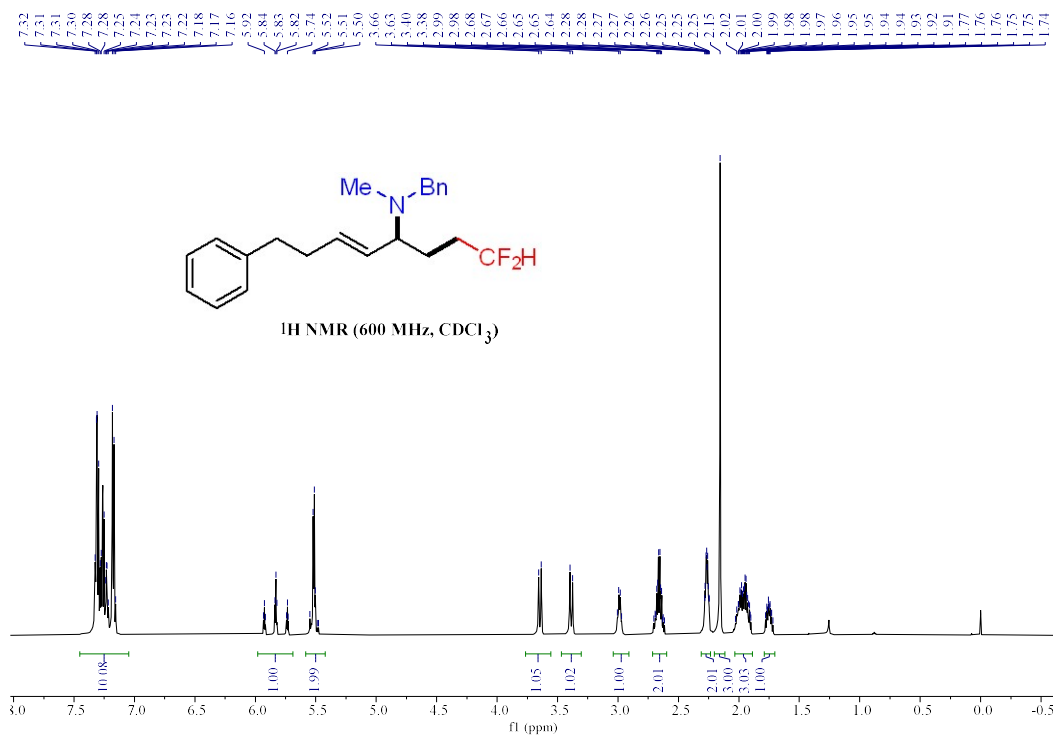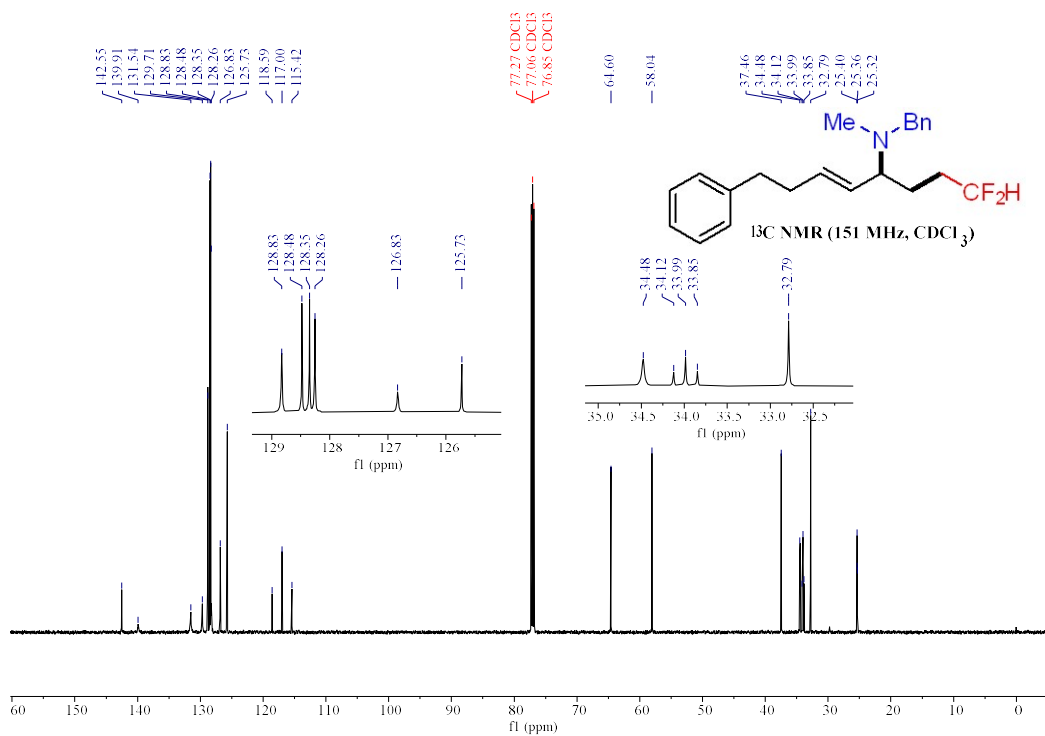

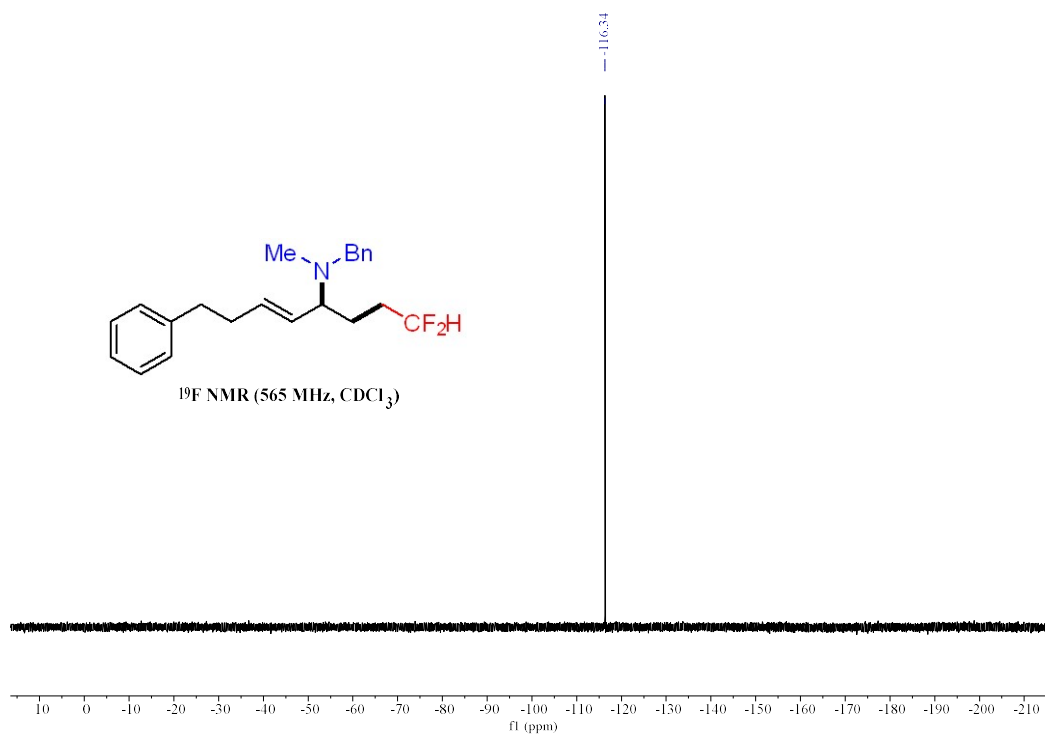

**(E)-N-Benzyl-1-cyclohexyl-6,6-difluoro-N-methylhex-1-en-3-amine (4u)**

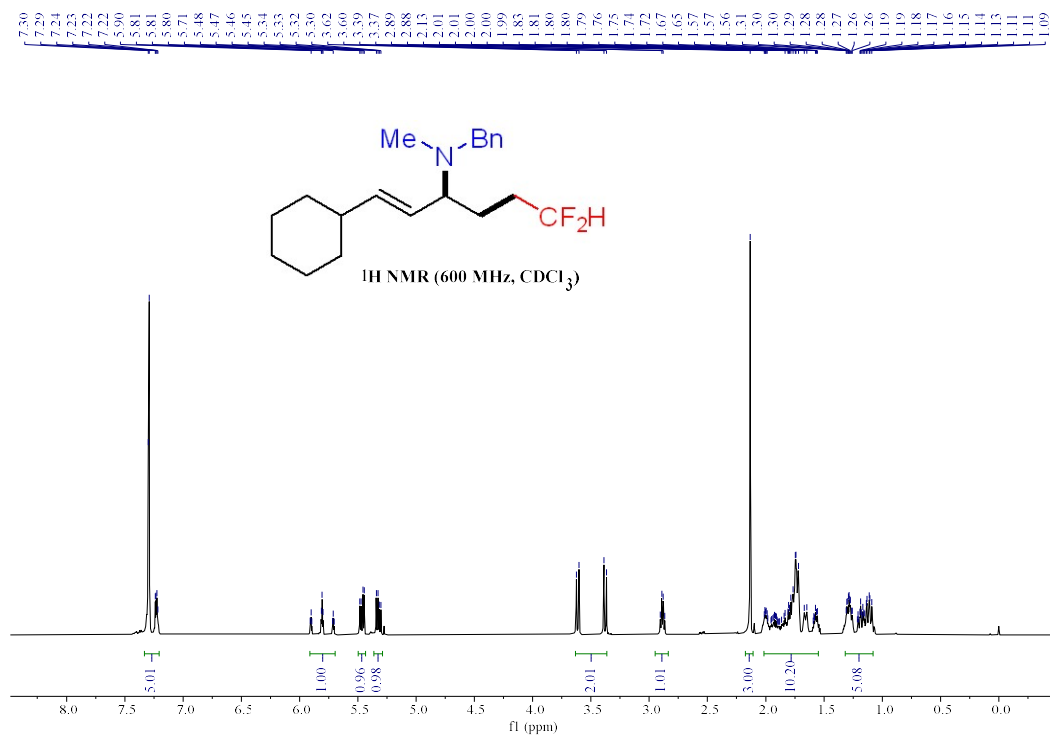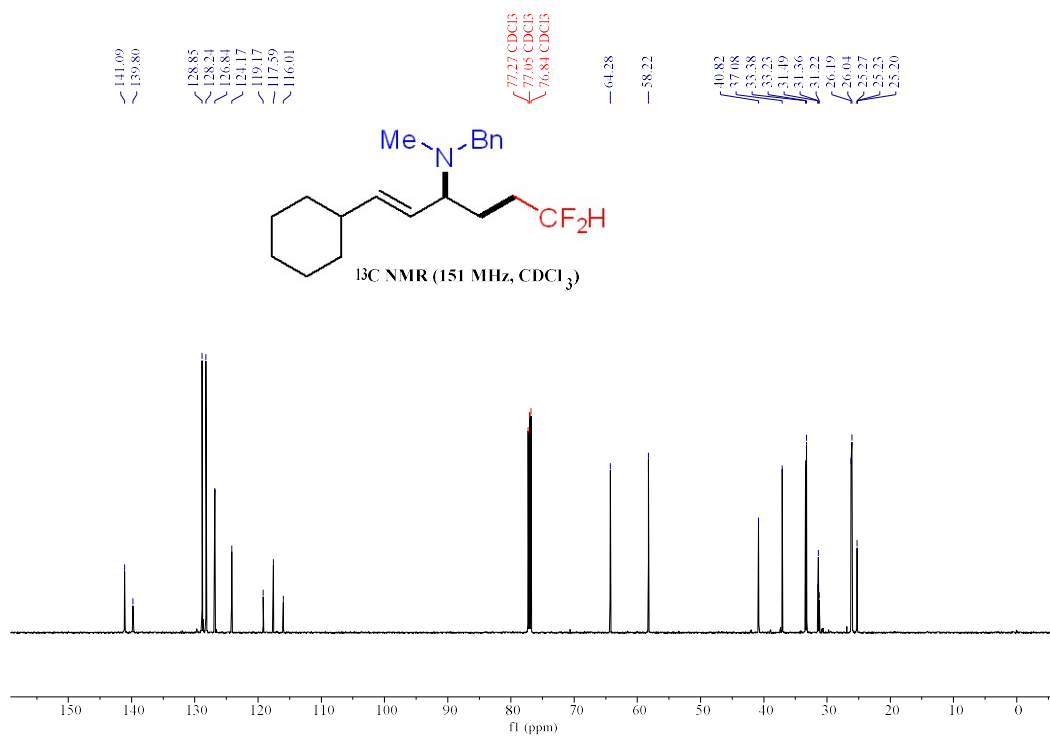

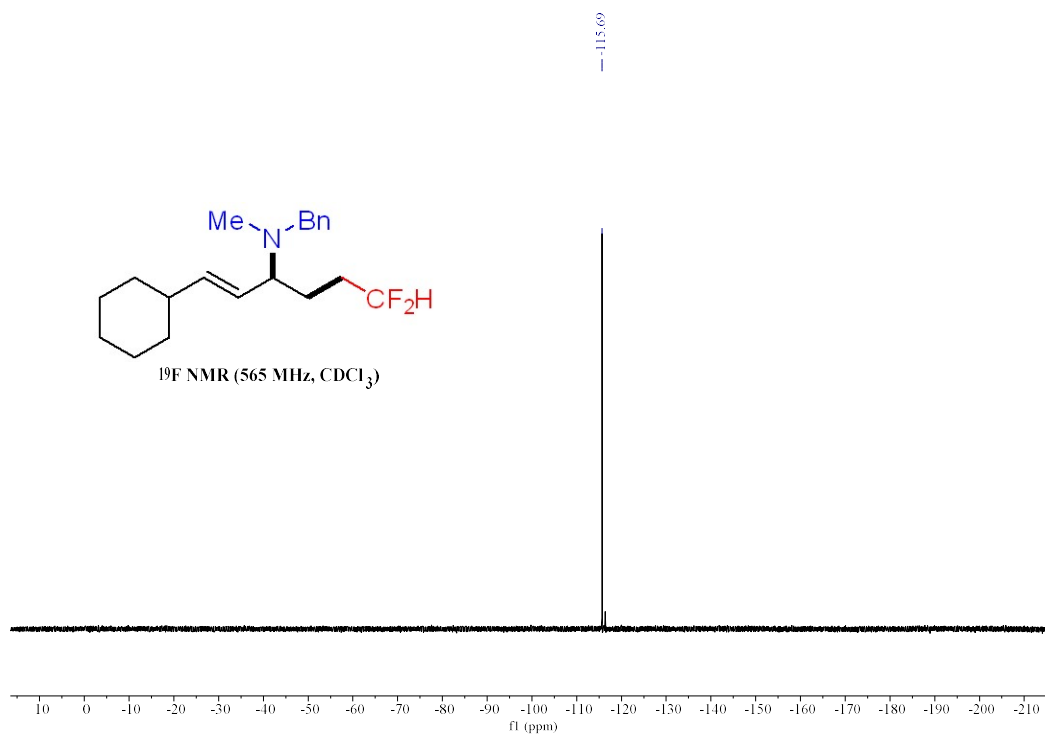



**(5*E*,7*E*)-*N*-Benzyl-1,1-difluoro-*N*-methyl-8-phenylocta-5,7-dien-4-amine (4v)**

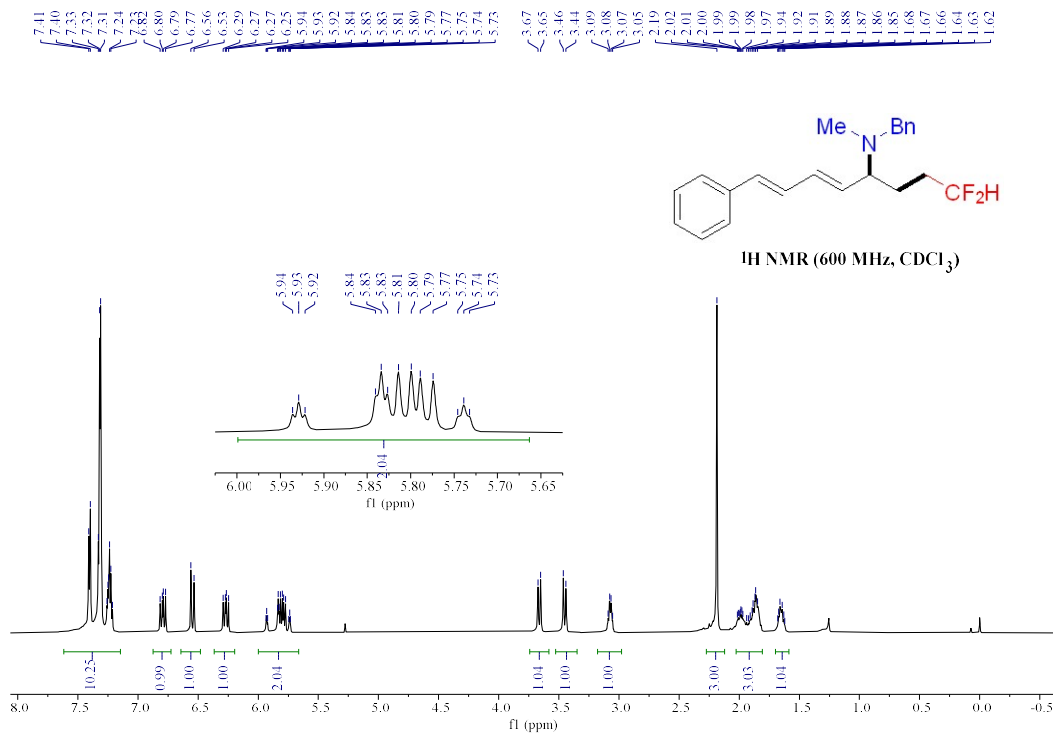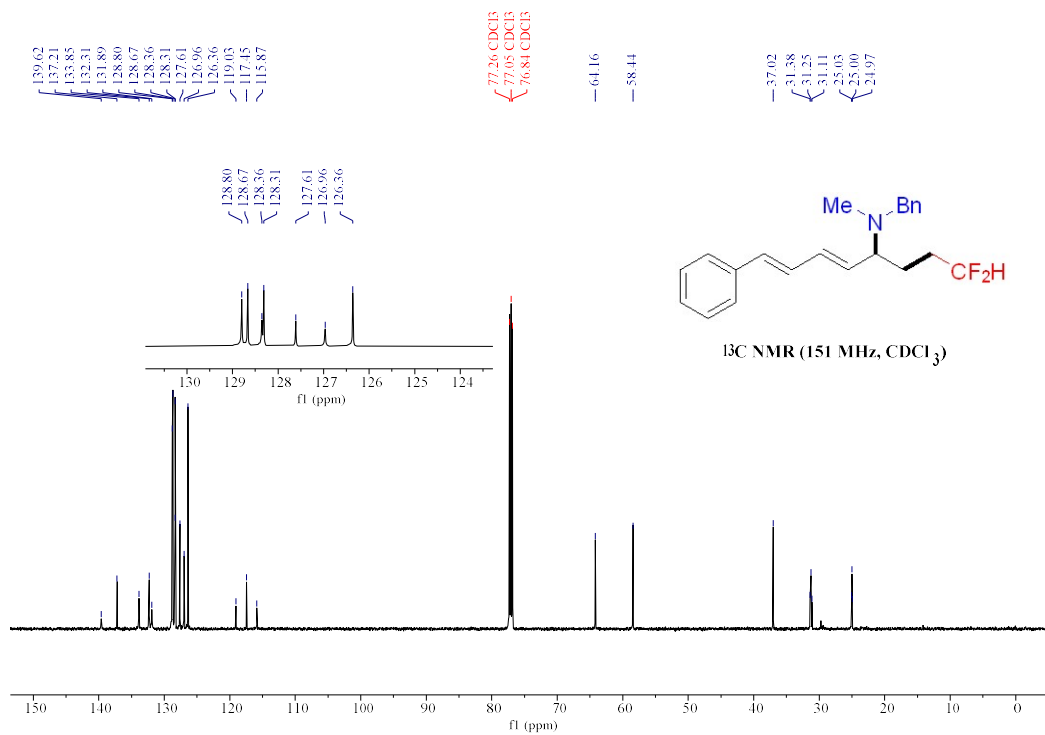

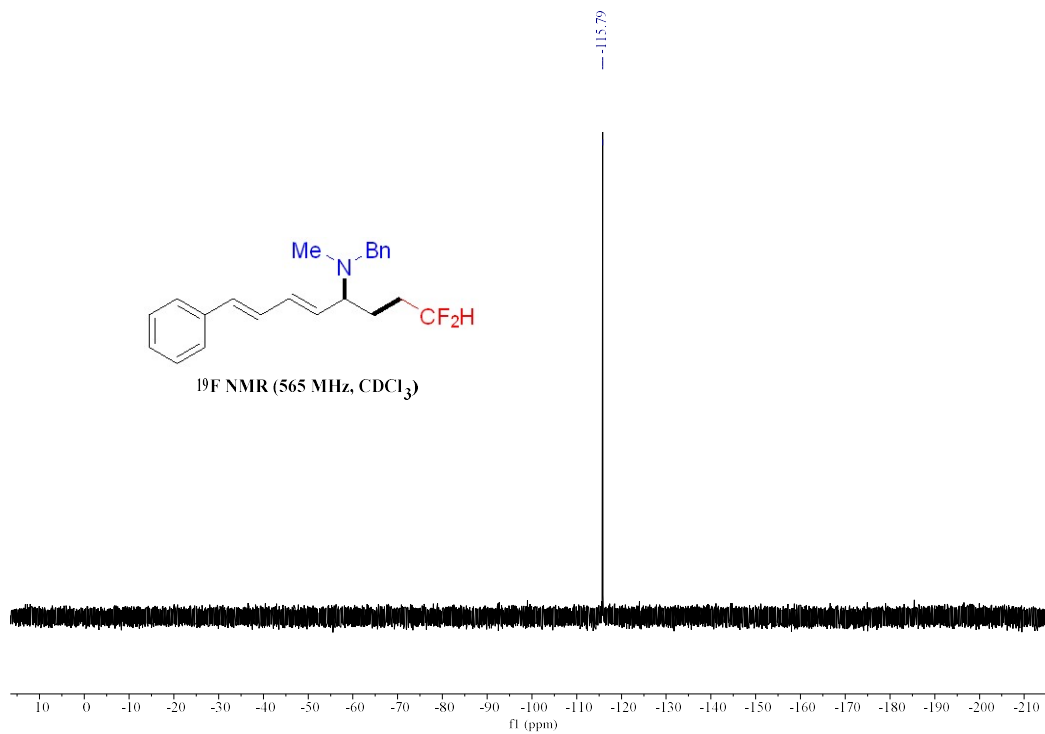

### Ethyl (*E*)-4-(Benzyl(methyl)amino)-7,7-difluorohept-2-enoate (4w)

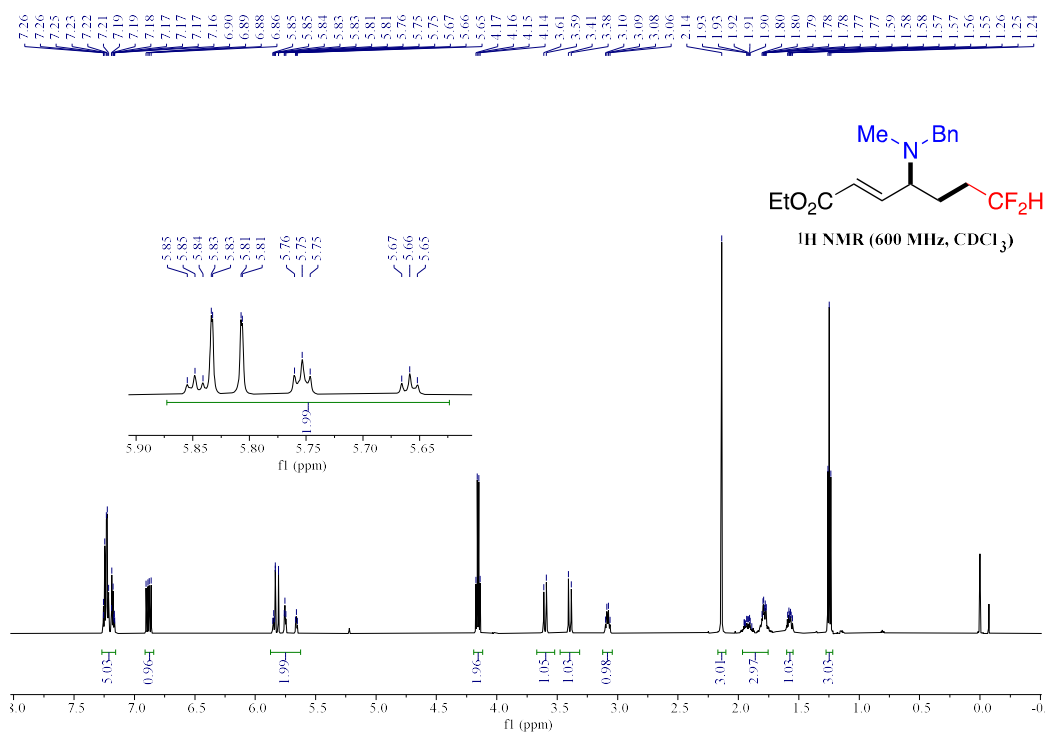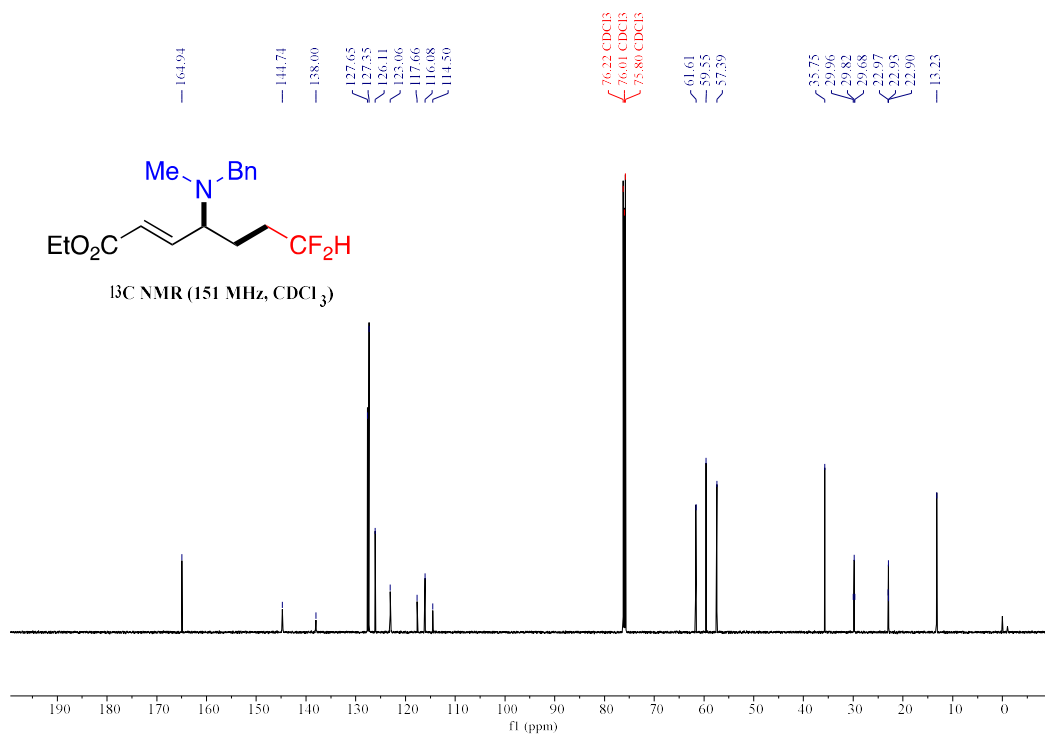

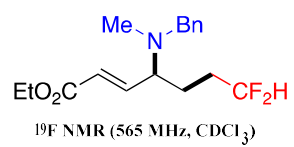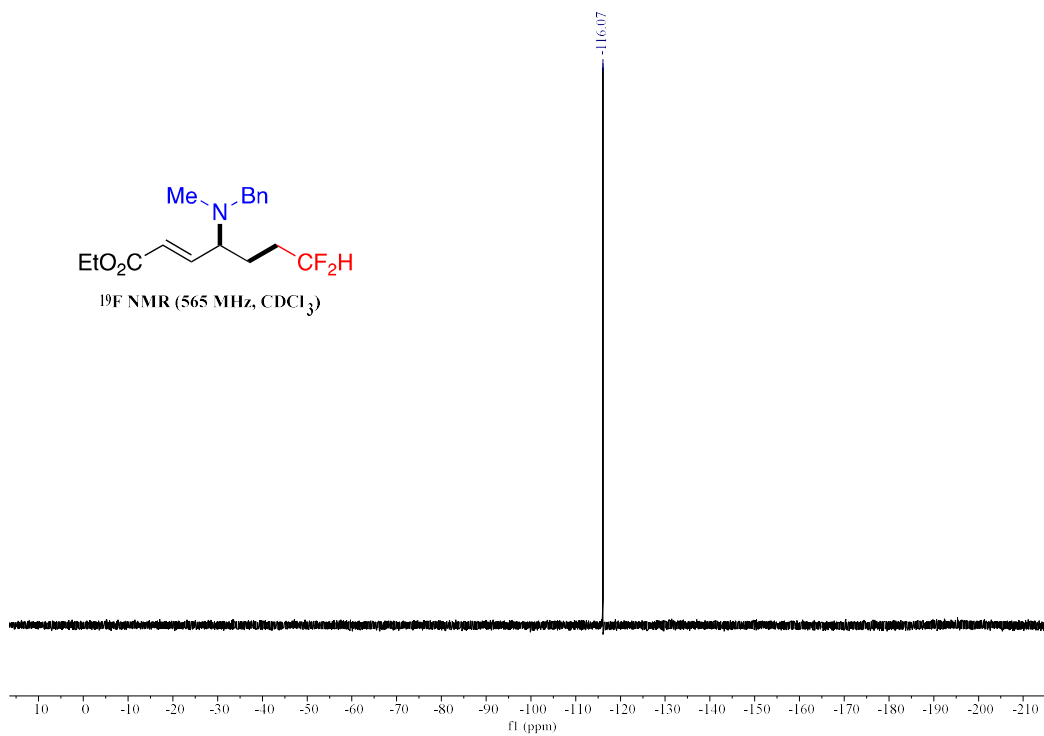

**(E)-6,6-Difluoro-N,N-dimethyl-1-phenylhex-1-en-3-amine (5a)**

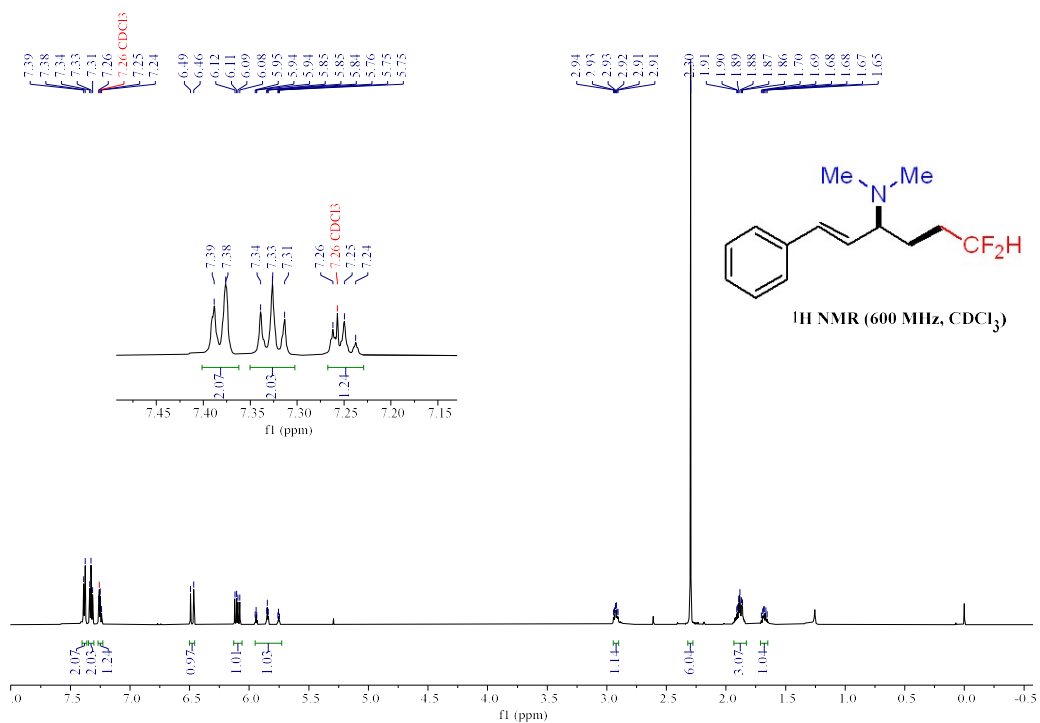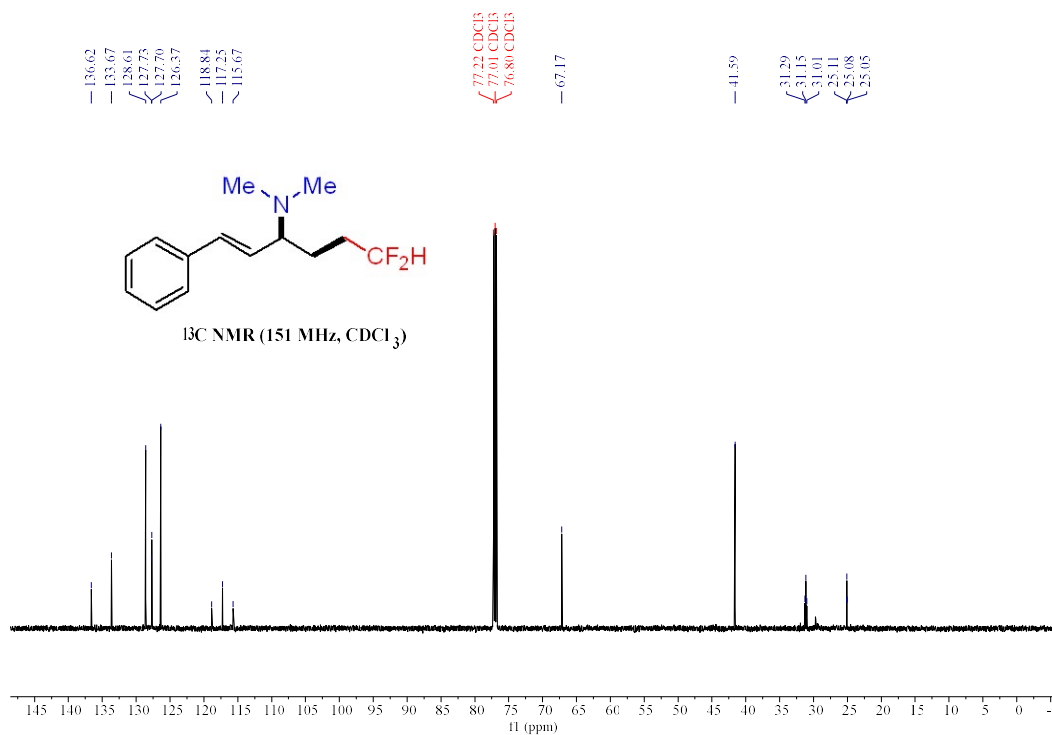

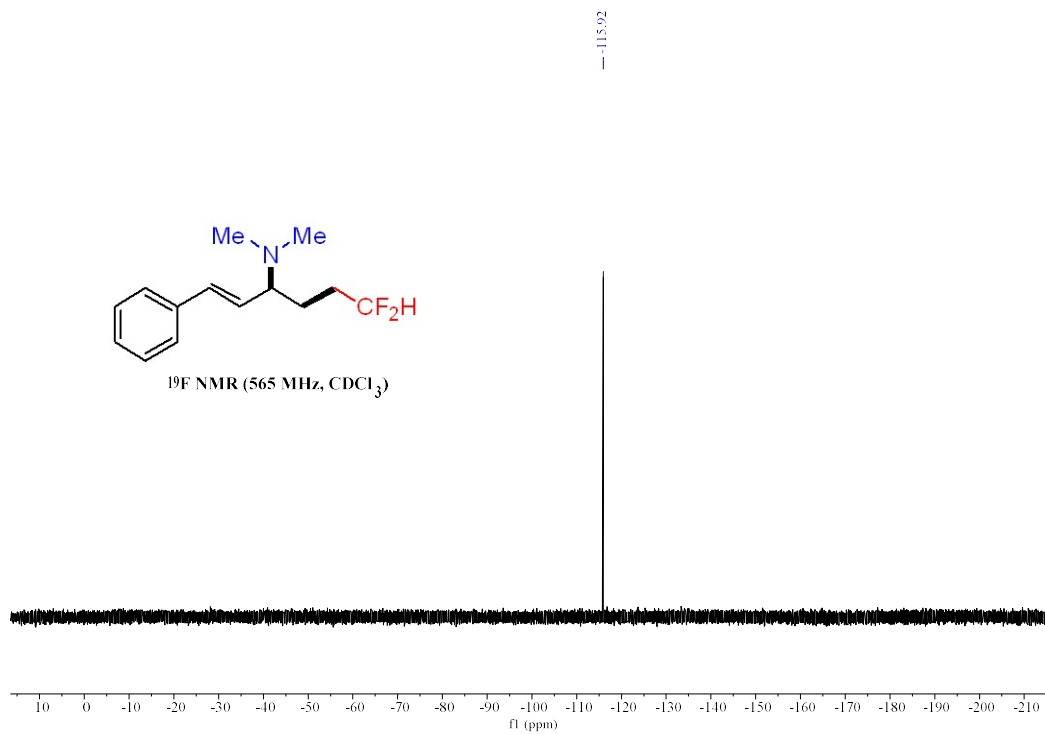

**(E)-N,N-Diethyl-6,6-difluoro-1-phenylhex-1-en-3-amine (5b)**

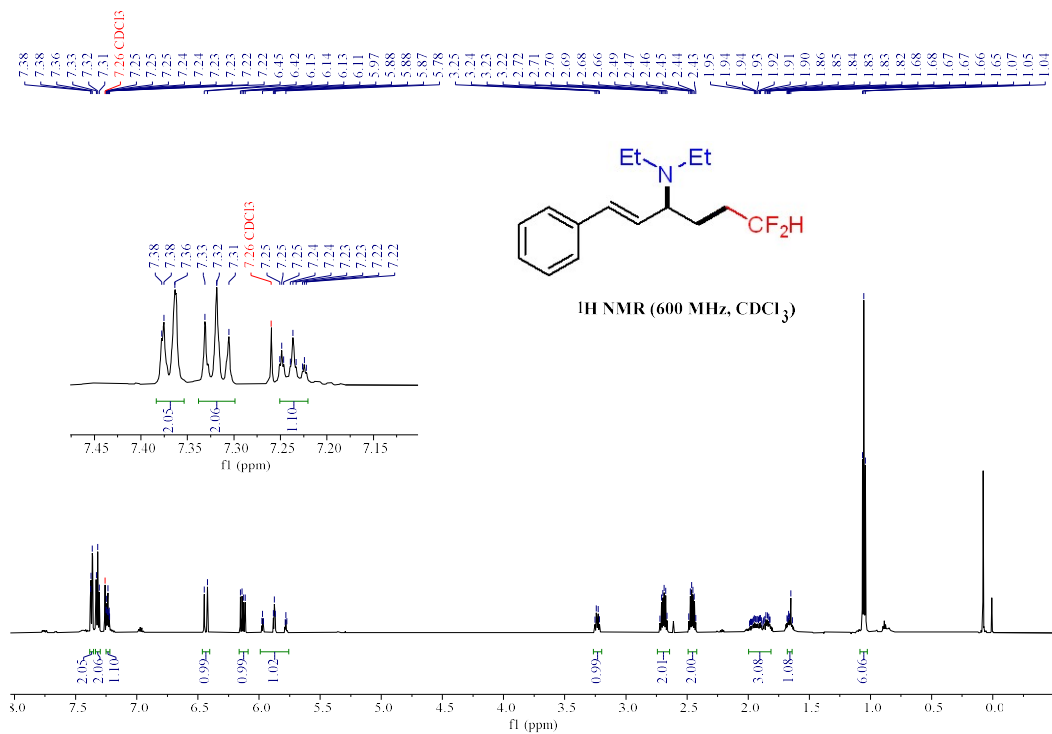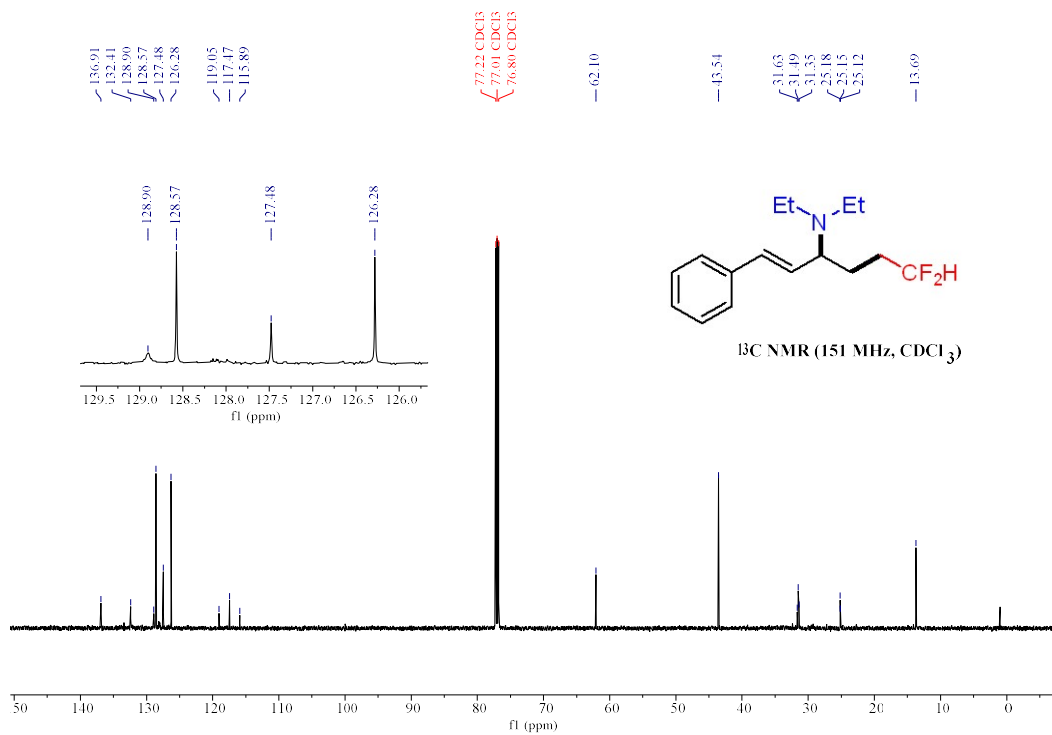

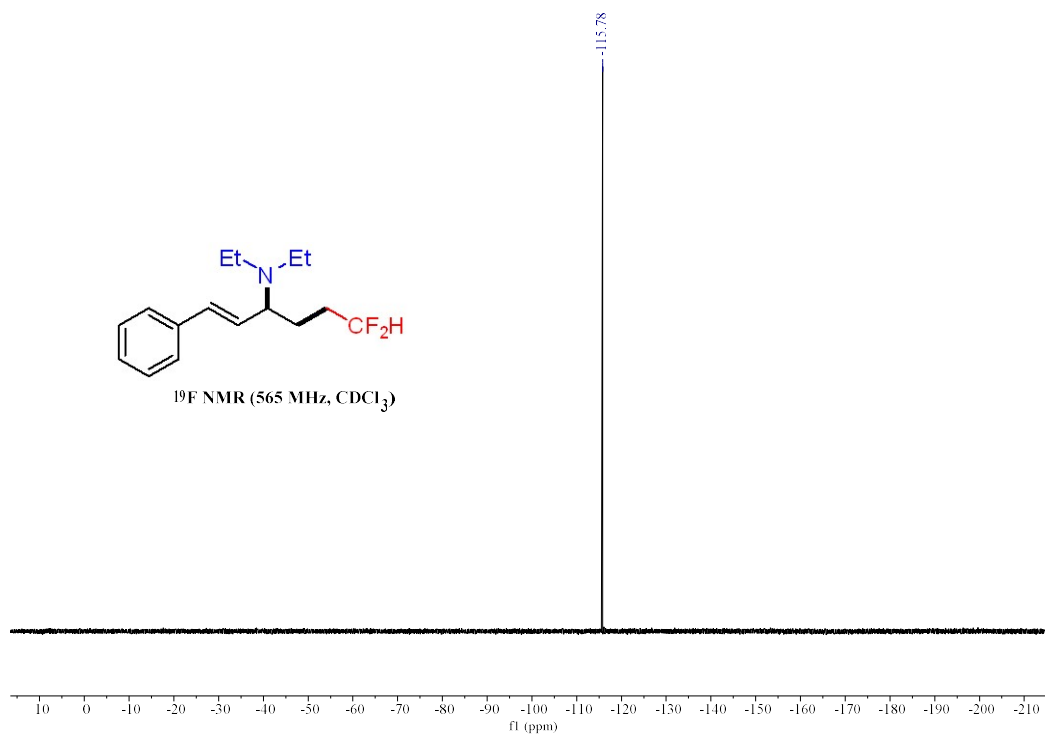



**(E)-N,N-Dibenzyl-6,6-difluoro-1-phenylhex-1-en-3-amine (5c)**

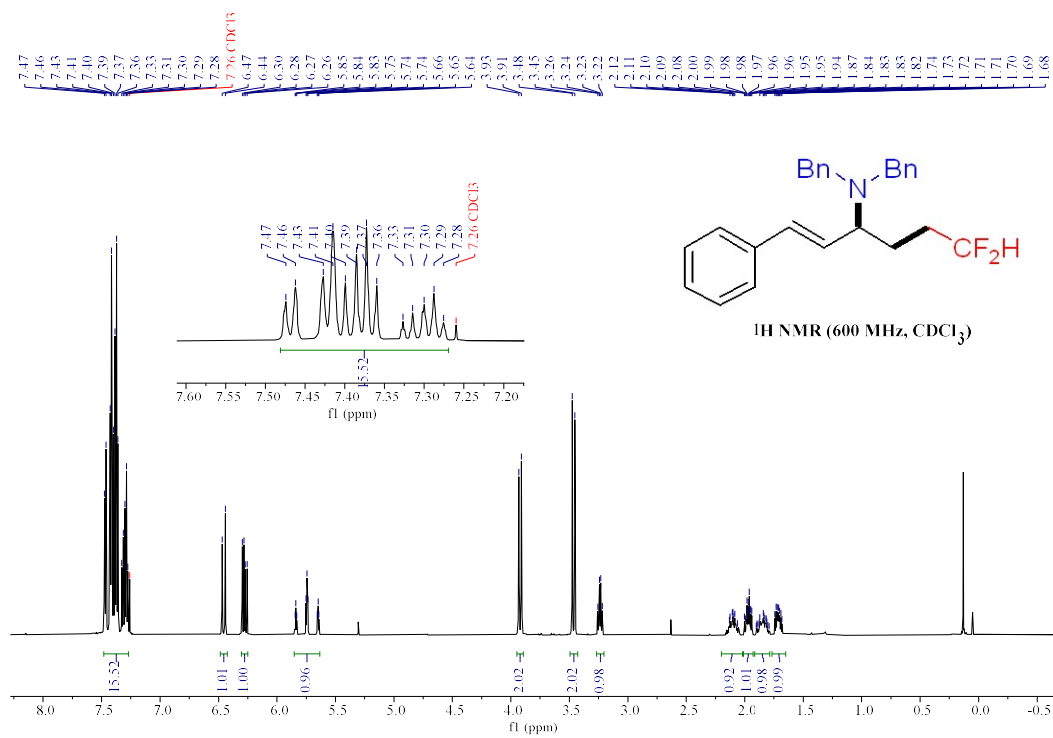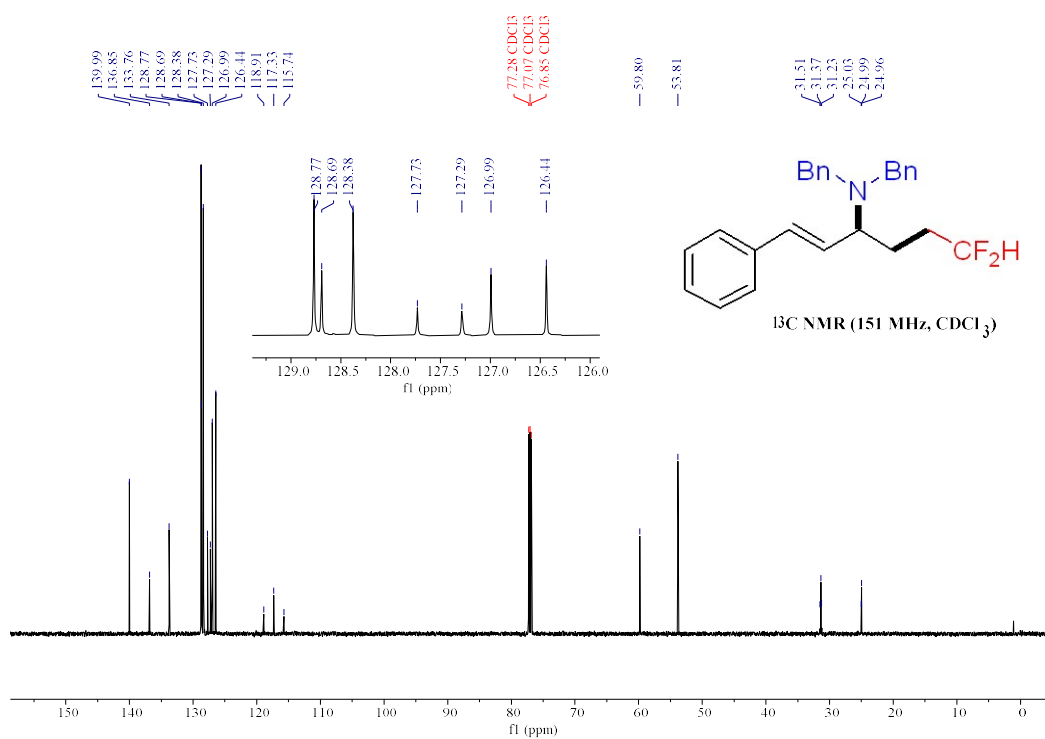

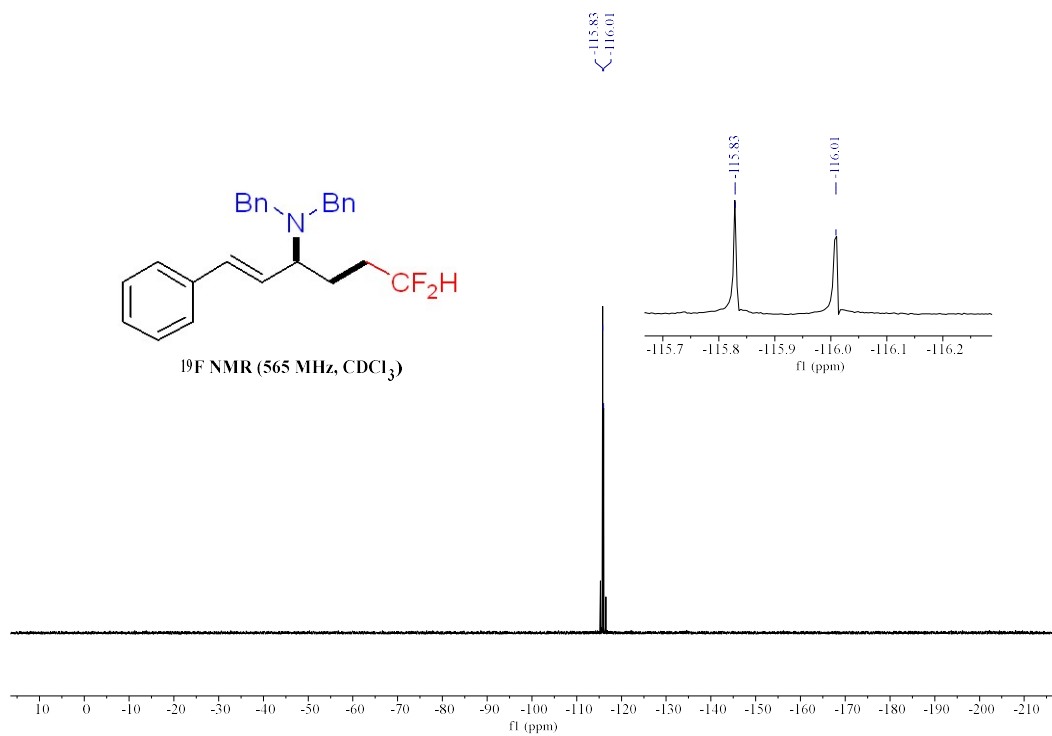

**(E)-N,N-Diallyl-6,6-difluoro-1-phenylhex-1-en-3-amine (5d)**

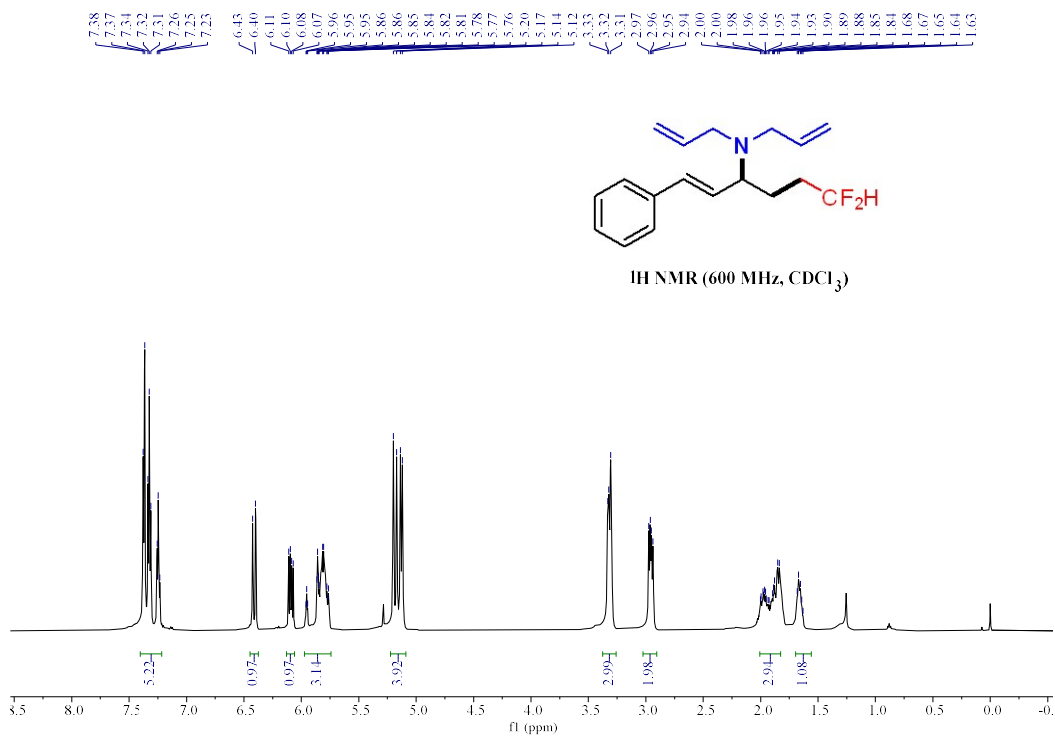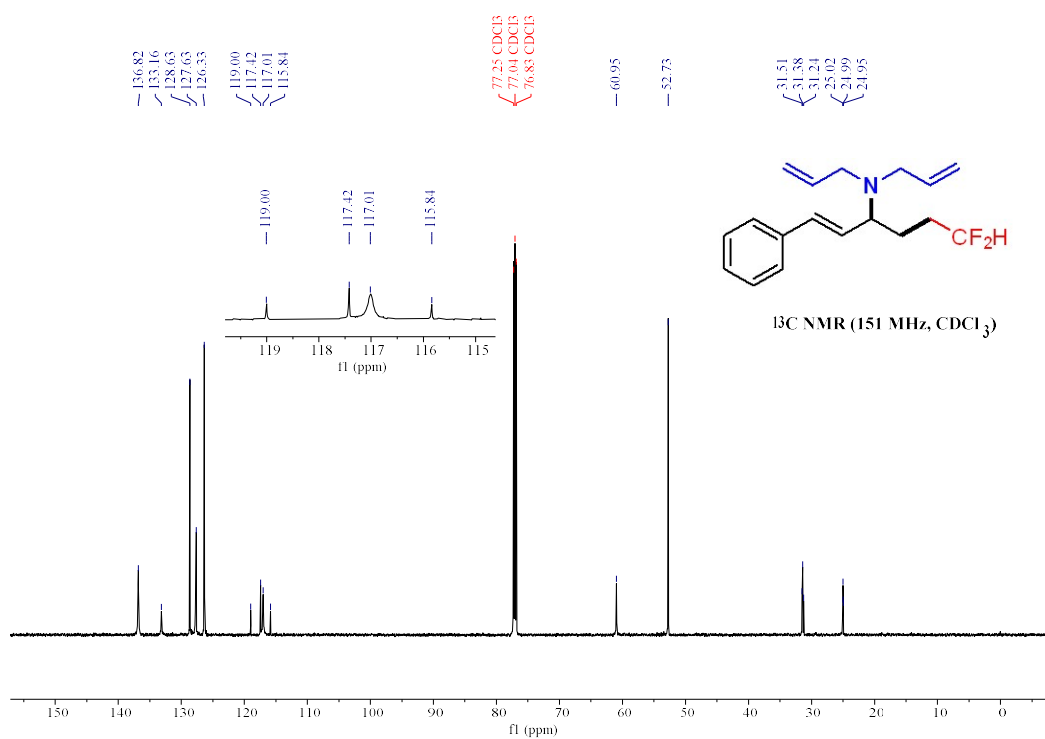

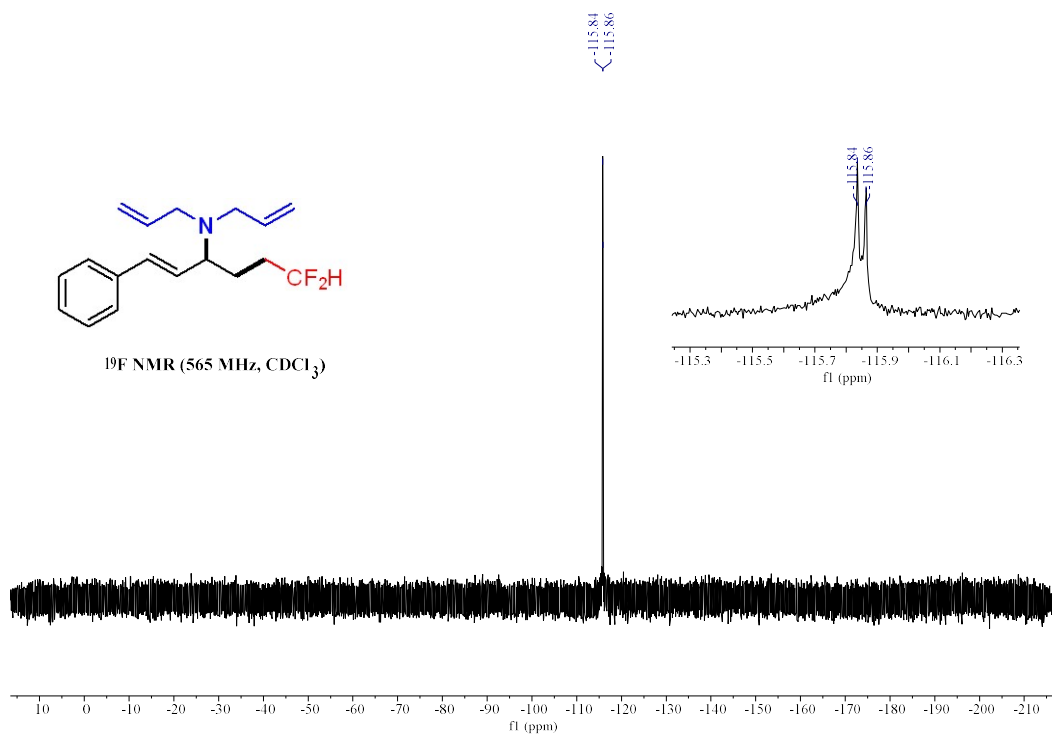

**(E)-N-Ethyl-6,6-difluoro-1-phenyl-N-(pyridin-4-ylmethyl)hex-1-en-3-amine (5e)**

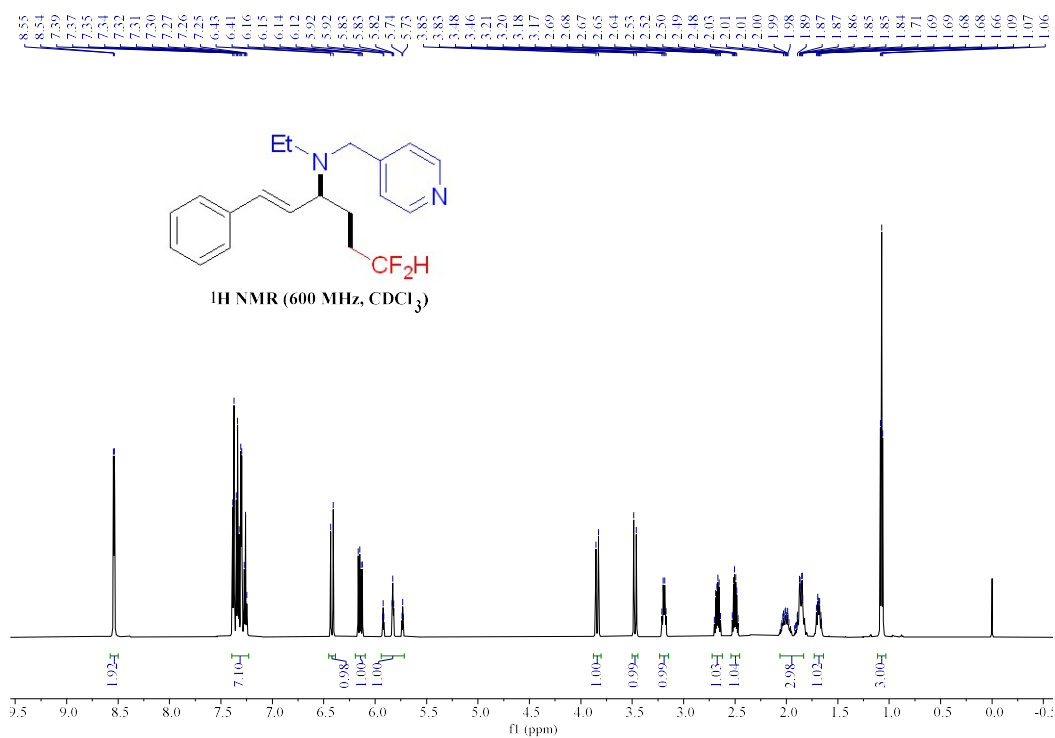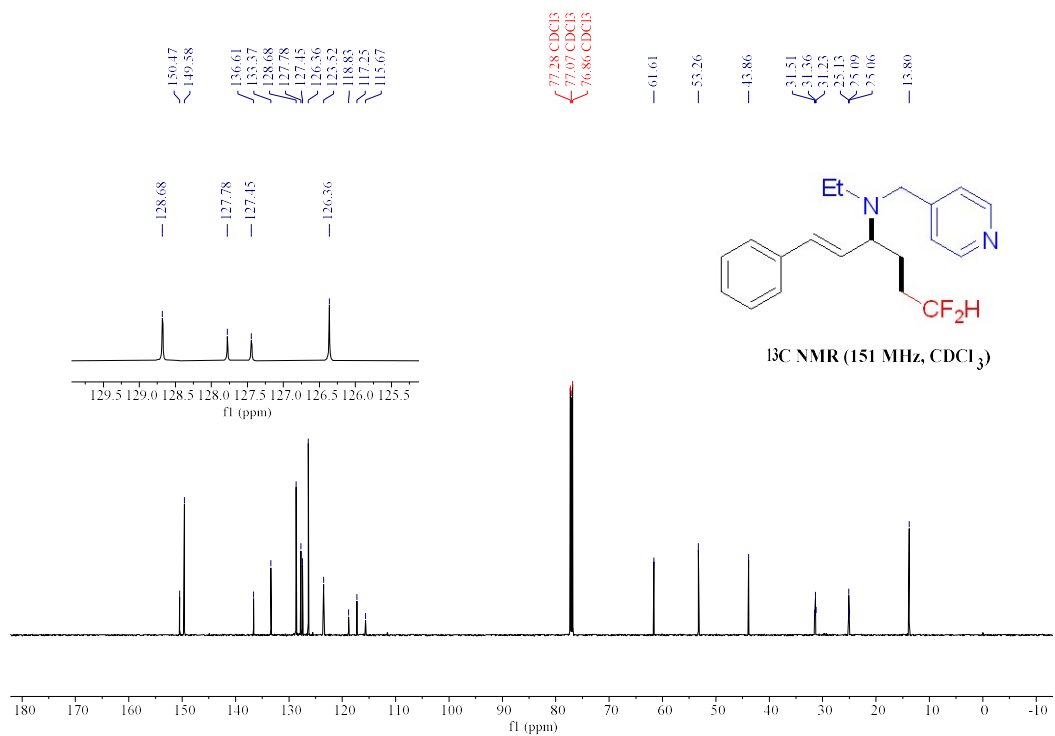

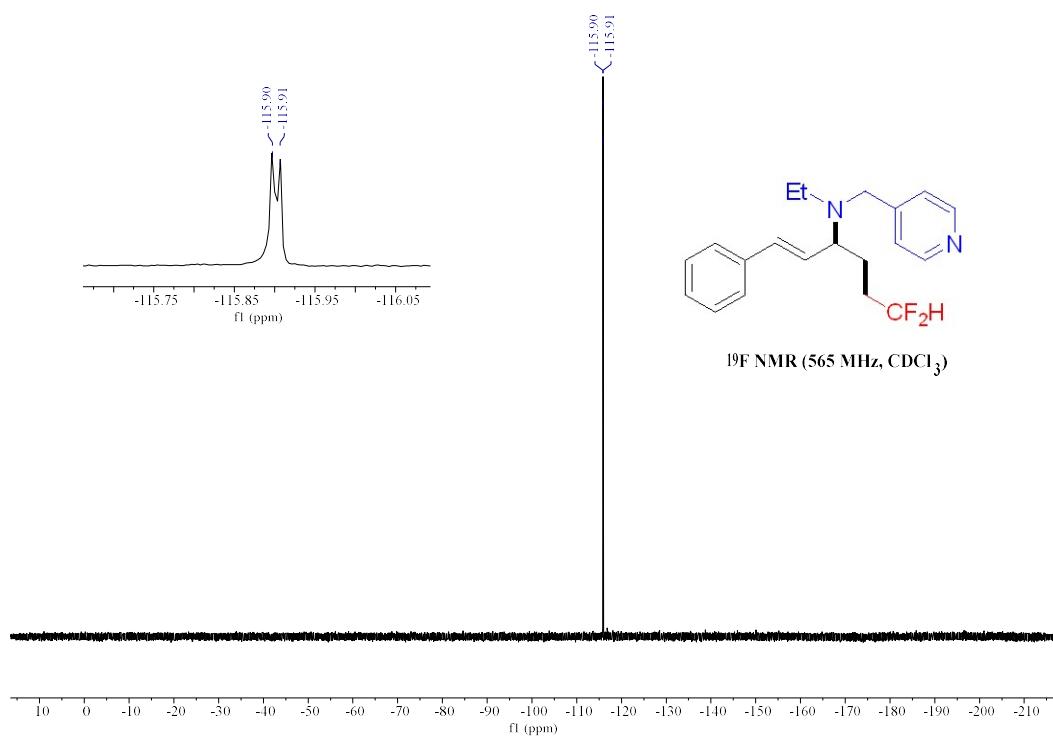

**(E)-N-Allyl-6,6-difluoro-N-methyl-1-phenylhex-1-en-3-amine (5f)**

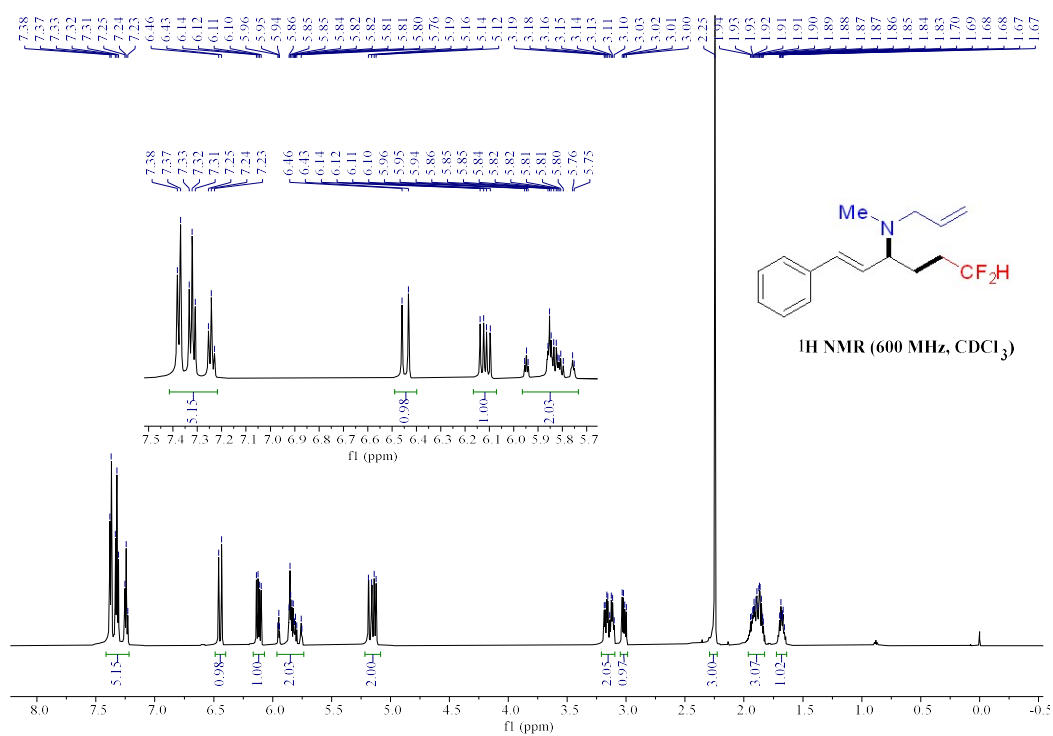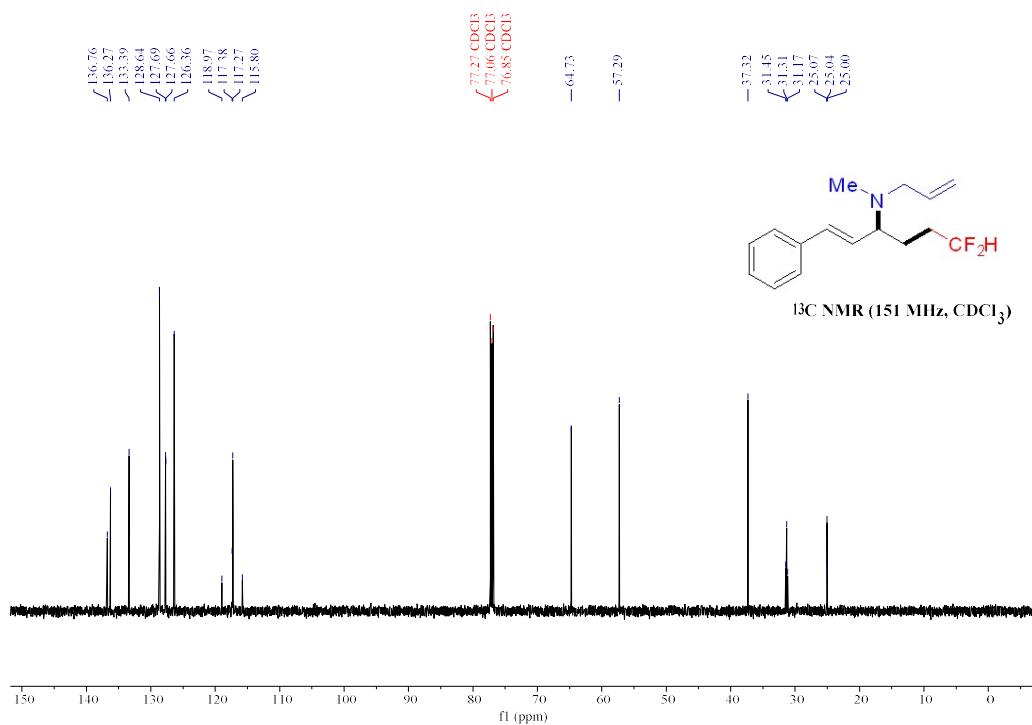

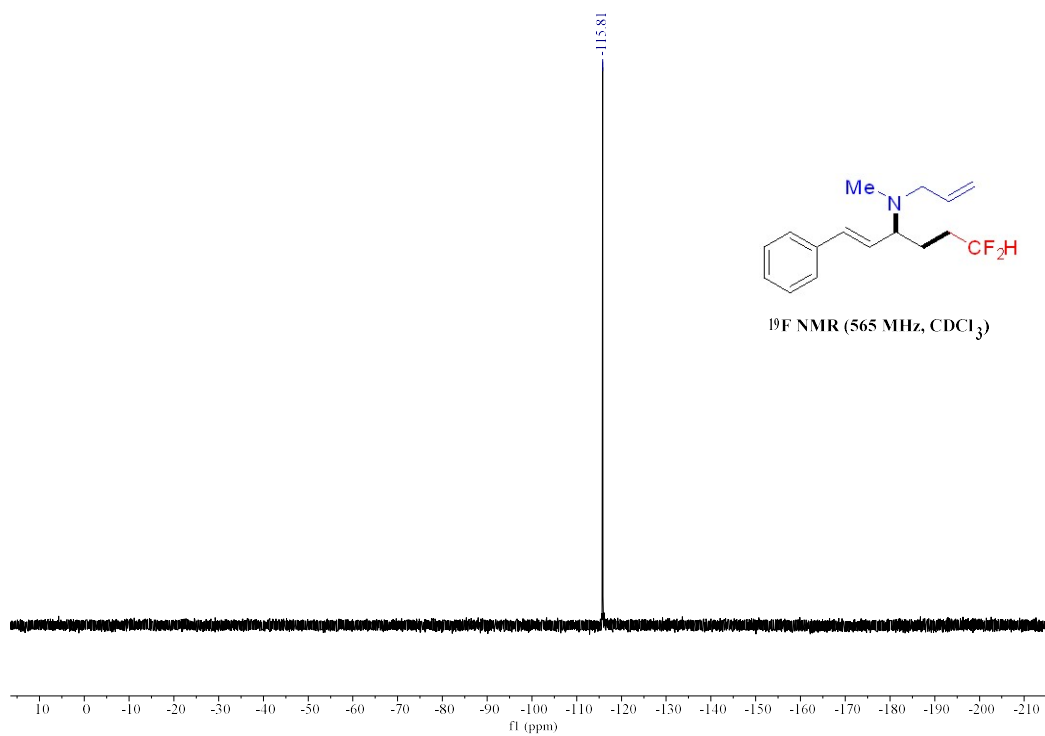



**(E)-1-(6,6-Difluoro-1-phenylhex-1-en-3-yl)pyrrolidine (5g)**

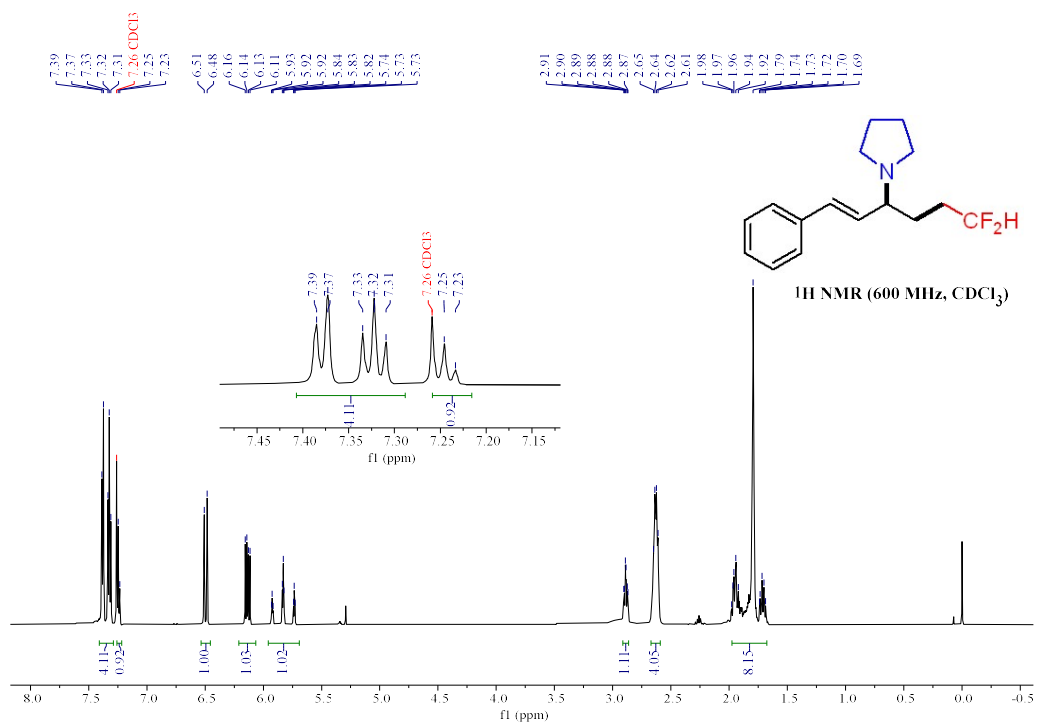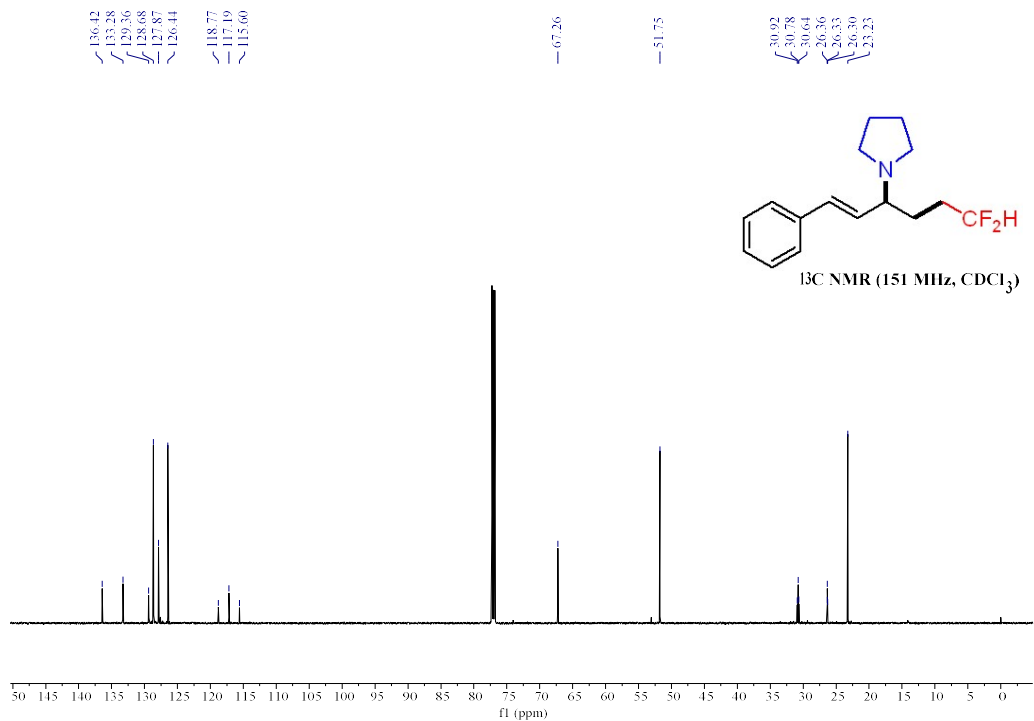

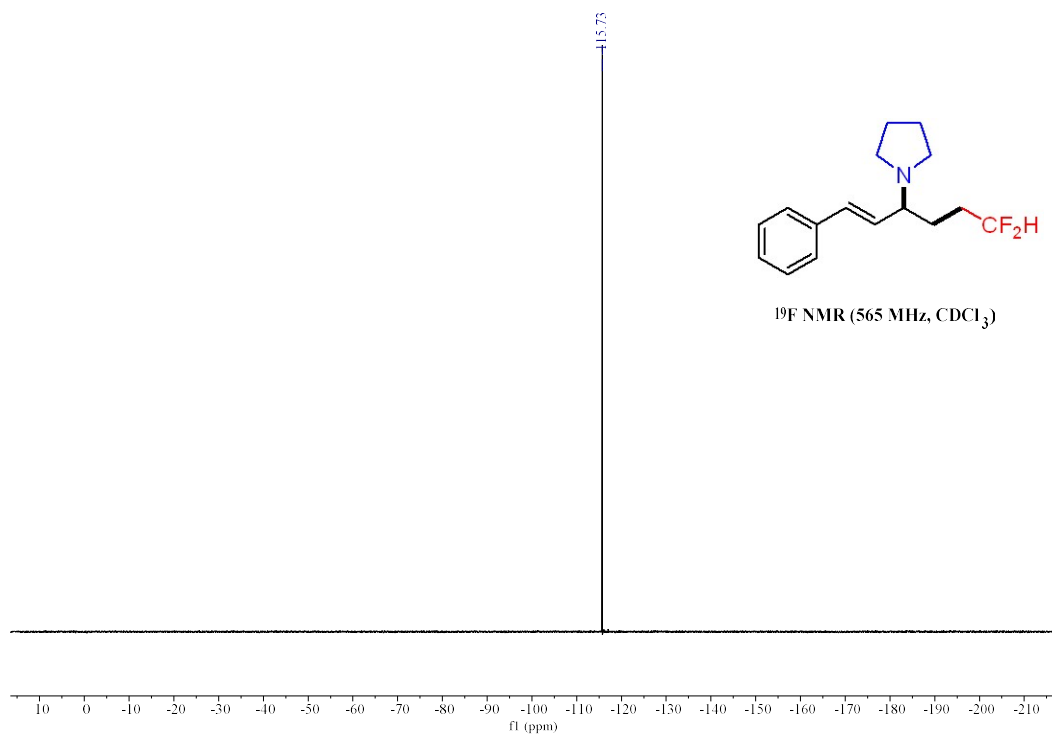

**(E)-4-(6,6-Difluoro-1-phenylhex-1-en-3-yl)morpholine (5h)**

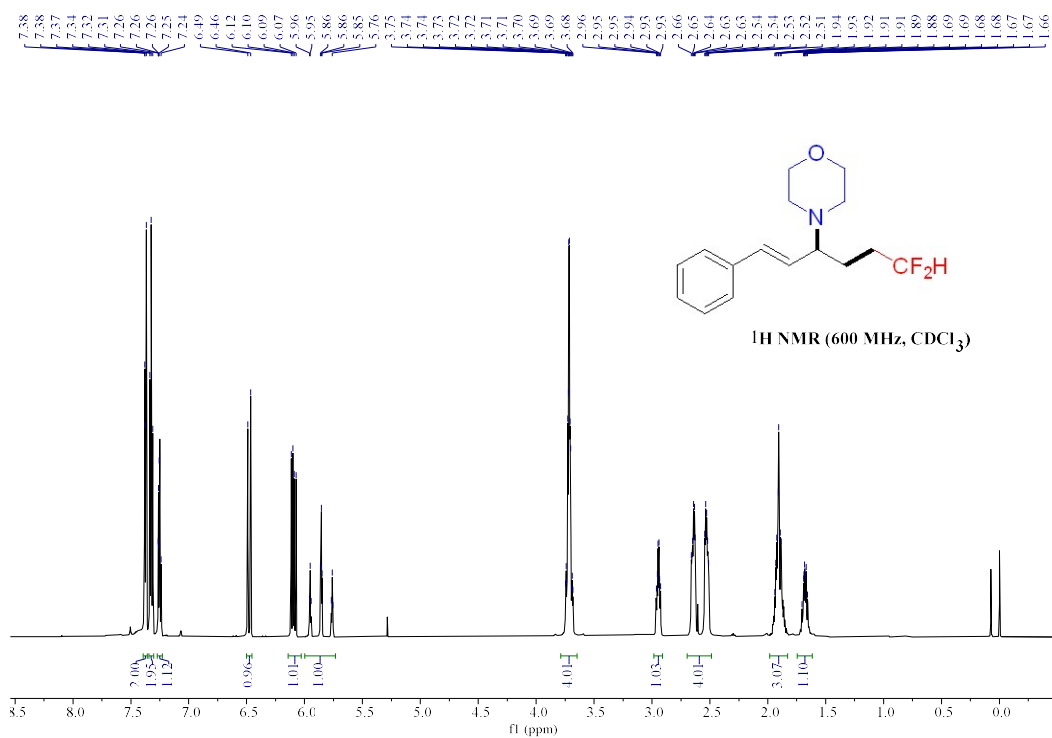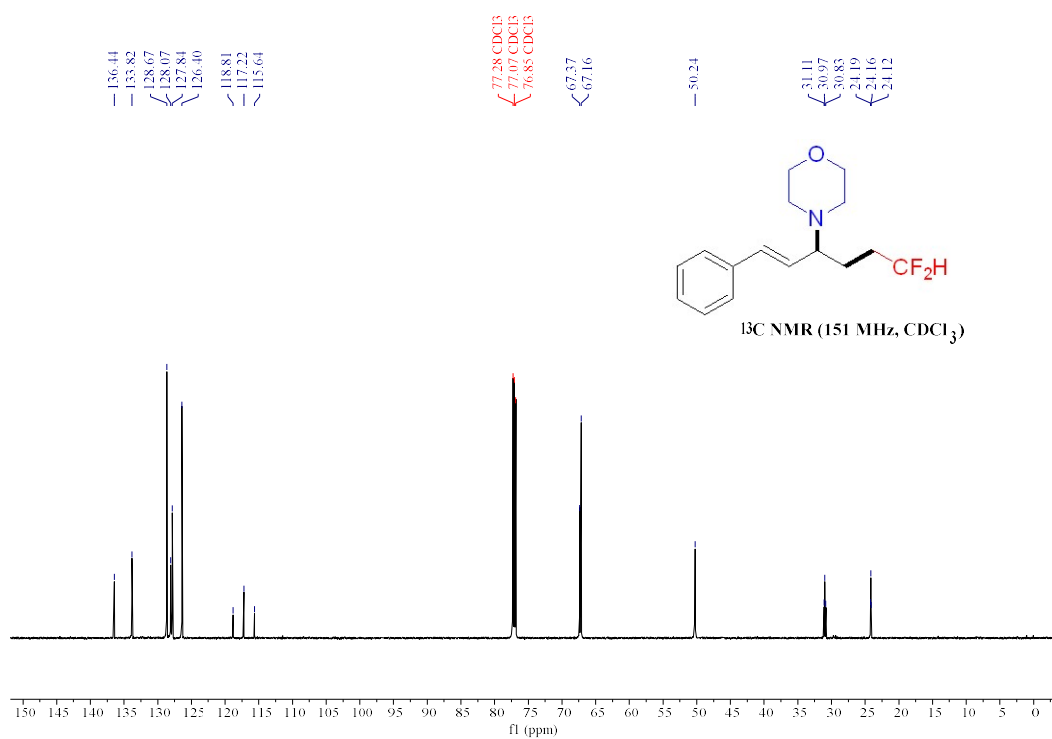

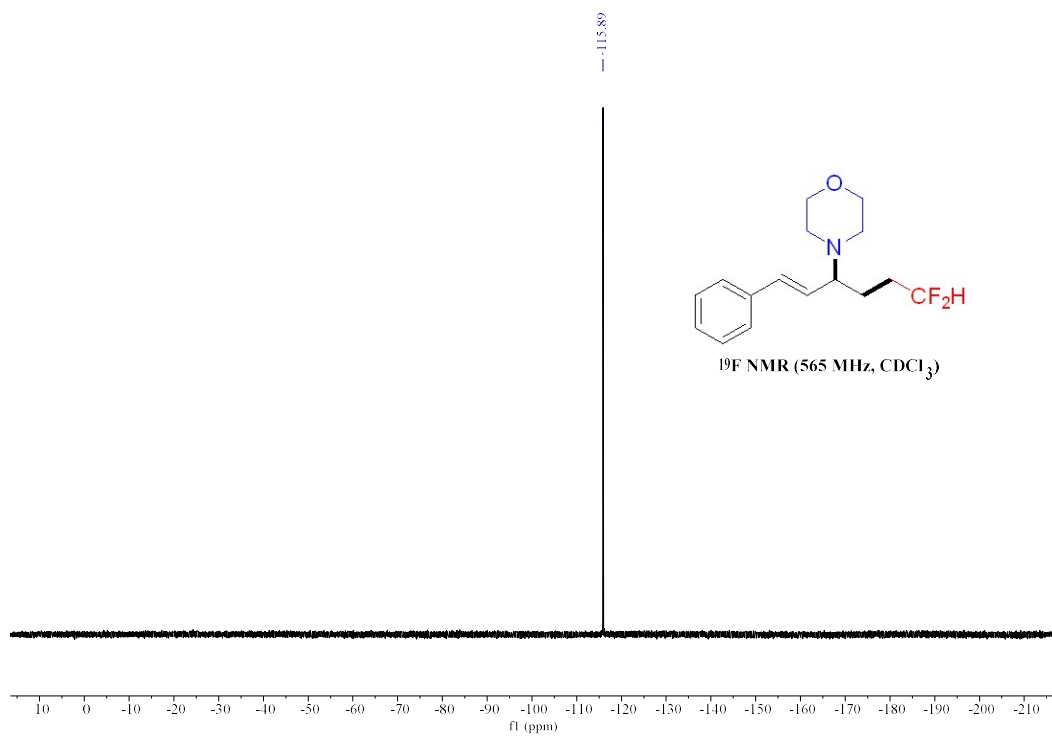

**(E)-1-(6,6-Difluoro-1-phenylhex-1-en-3-yl)-4-methylpiperazine (5i)**

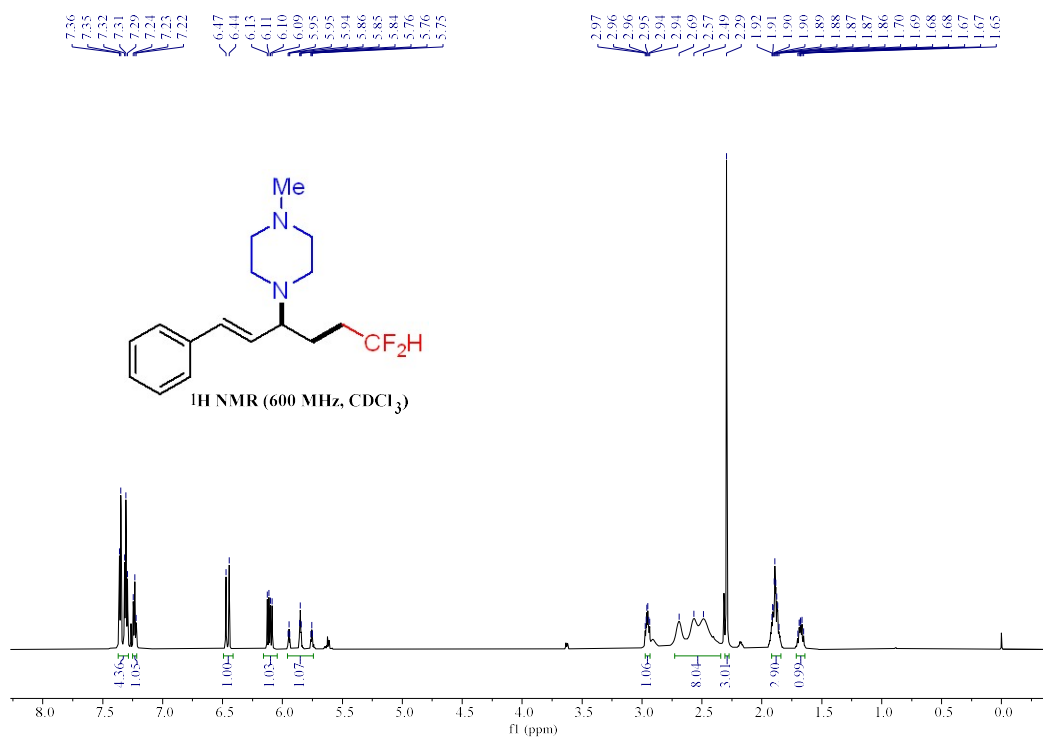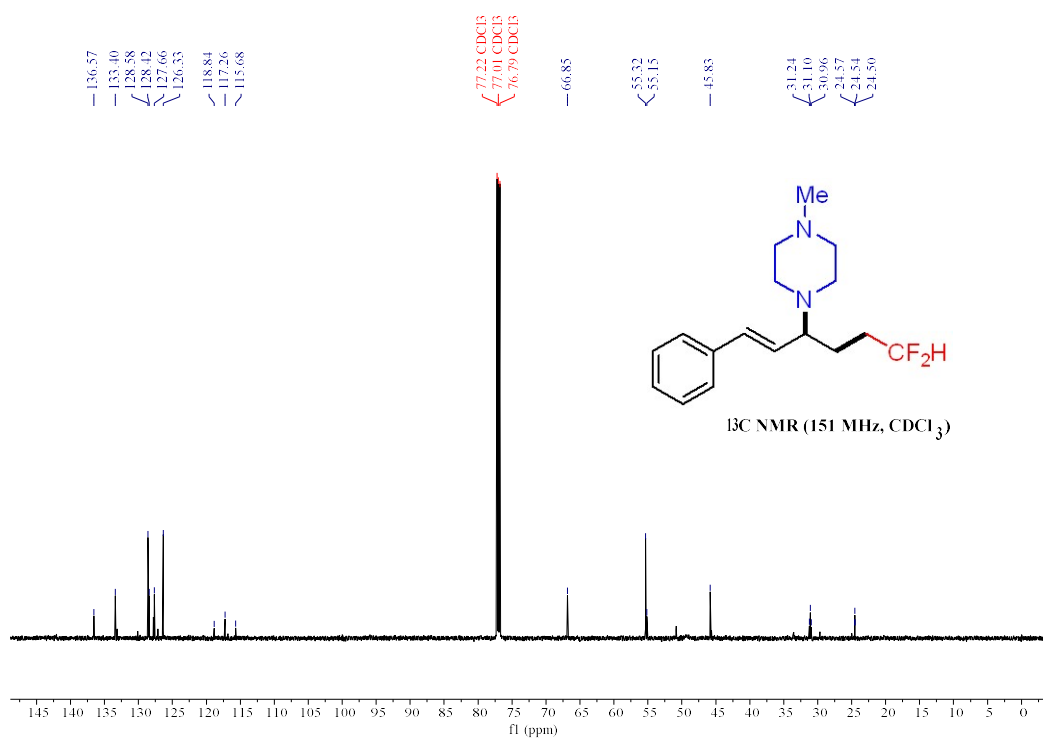

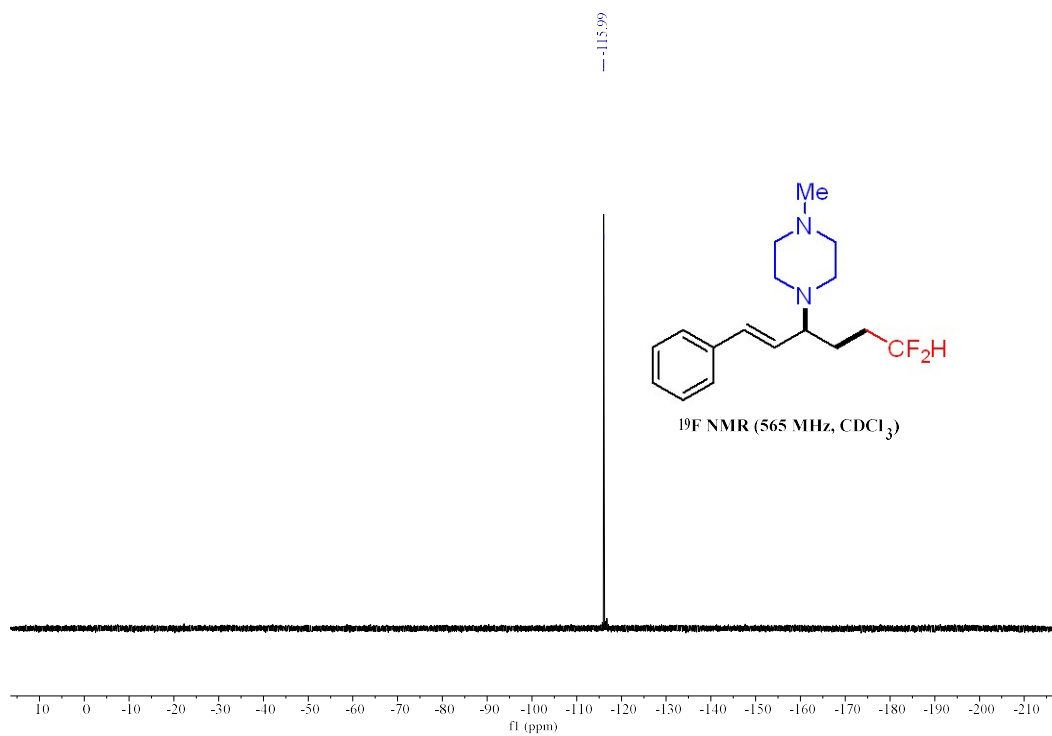

**(E)-2-(6,6-Difluoro-1-phenylhex-1-en-3-yl)-1,2,3,4-tetrahydroisoquinoline (5j)**

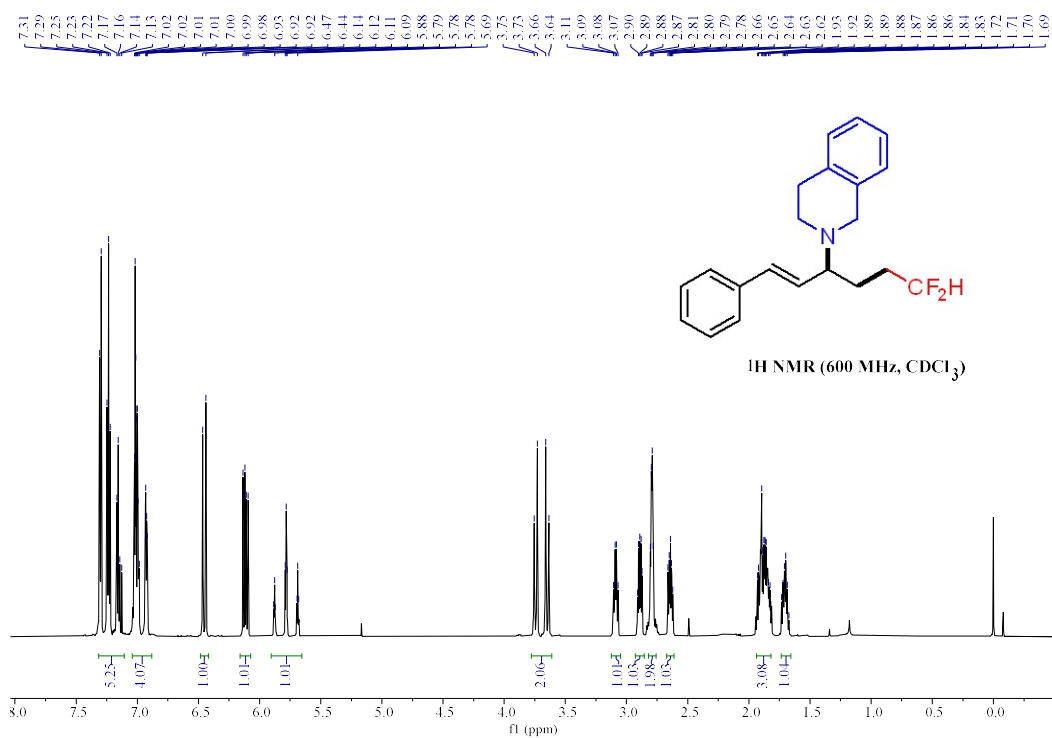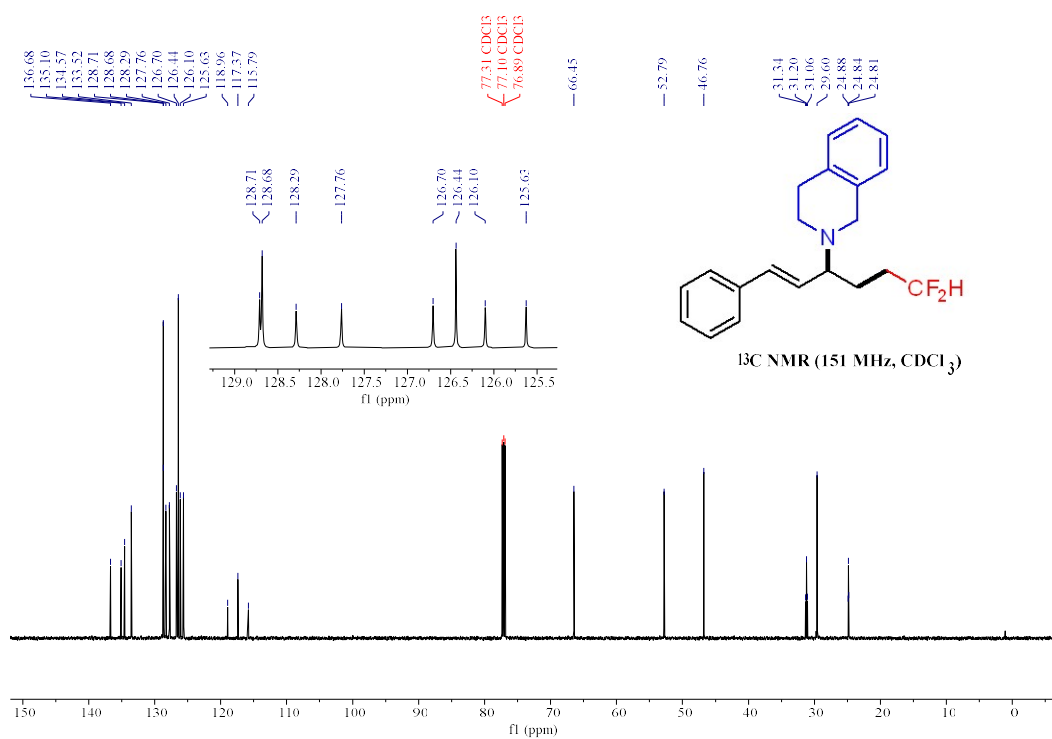

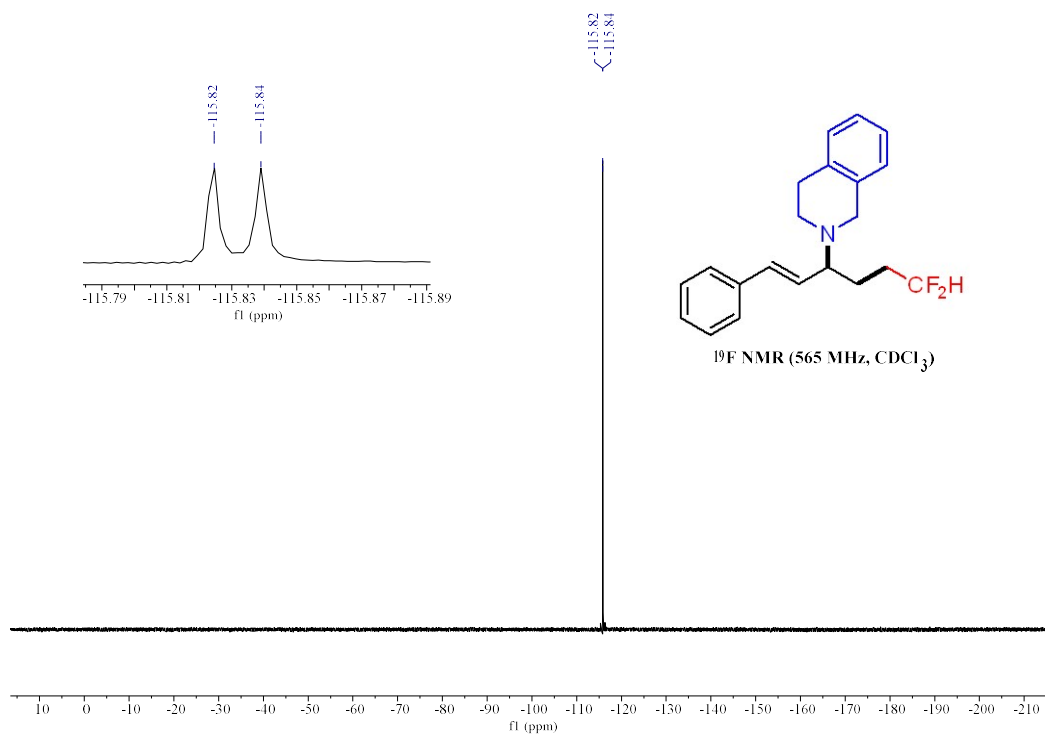



**(E)-7-(6,6-Difluoro-1-phenylhex-1-en-3-yl)-5,6,7,8-tetrahydro-[1,2,4]triazolo[1,5-a]pyrazine (5k)**

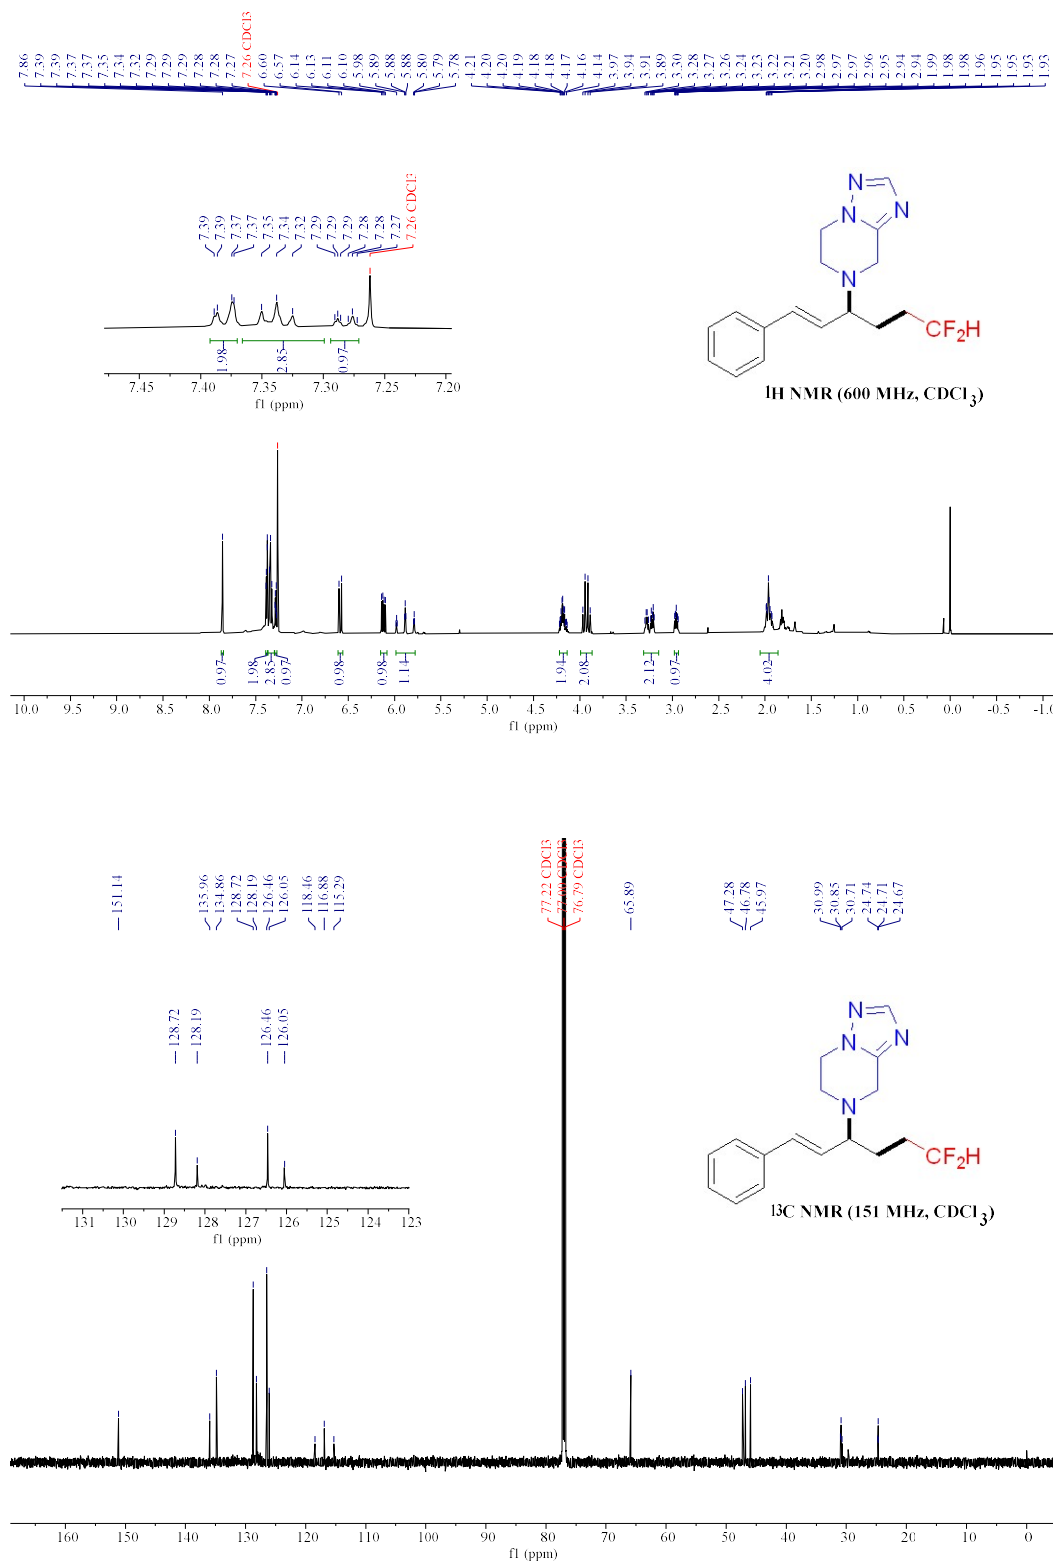

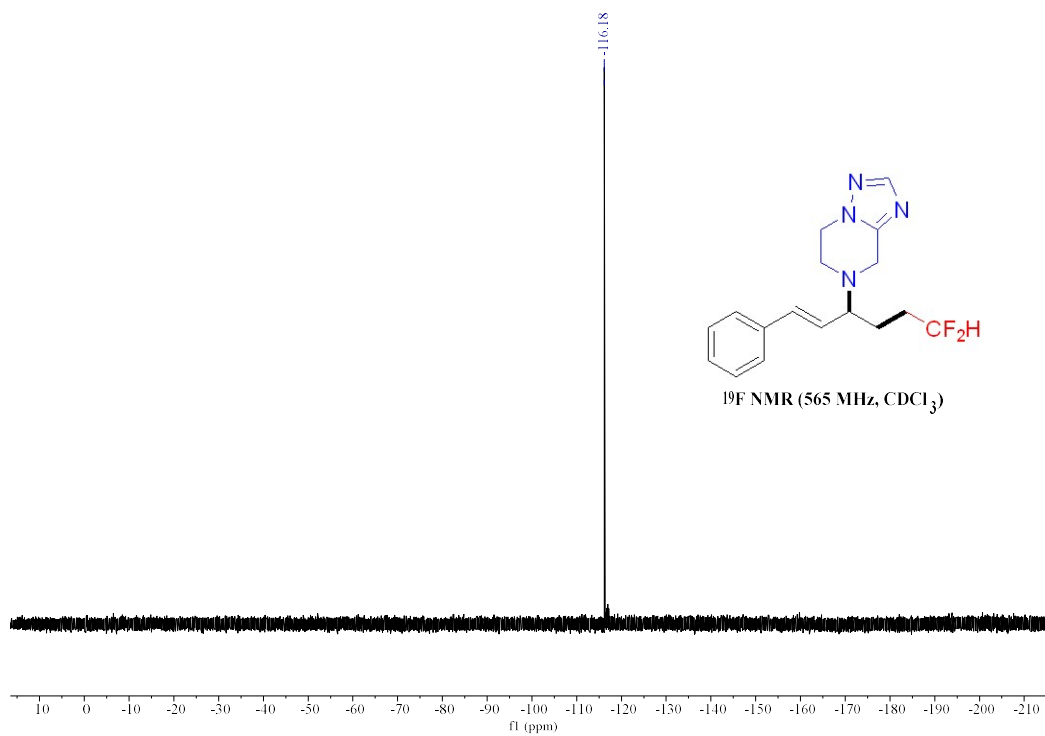

**(E)-1-(6,6-Difluoro-1-phenylhex-1-en-3-yl)indoline (51)**

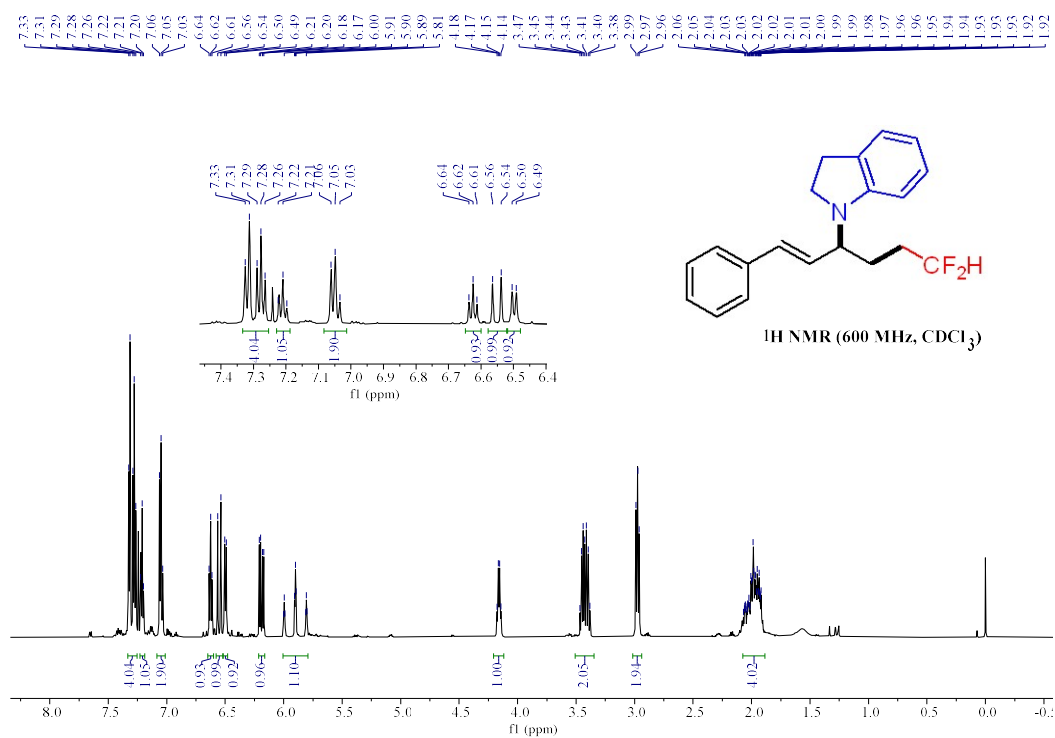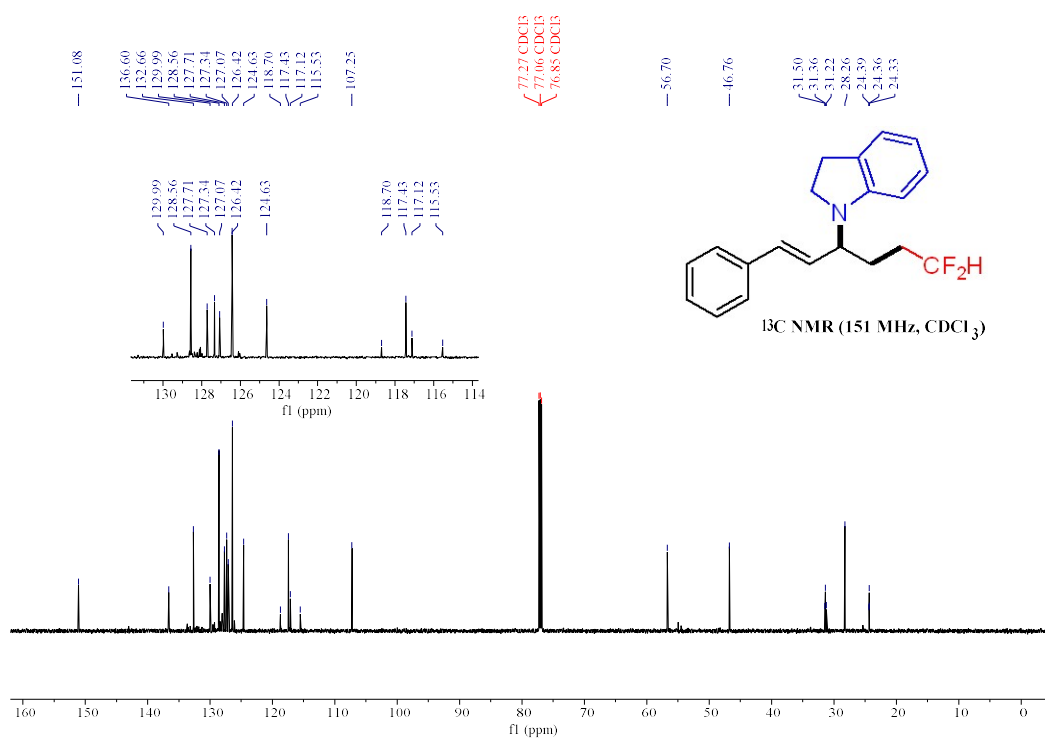

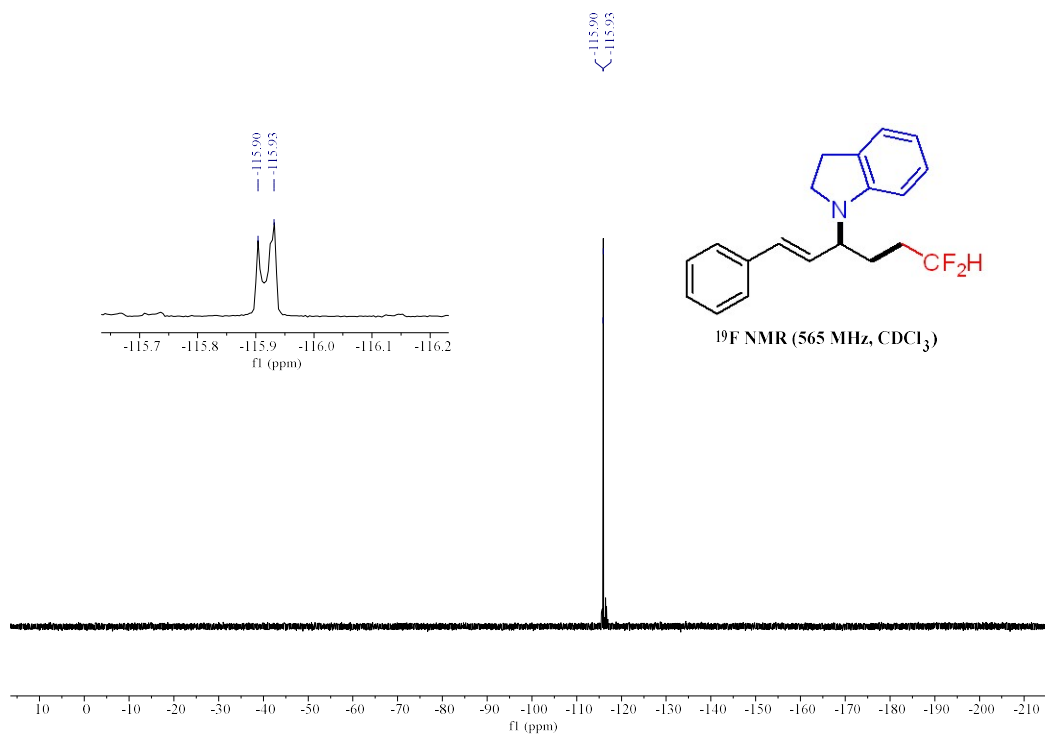

**(E)-N-(6,6-Difluoro-1-phenylhex-1-en-3-yl)-N-methylaniline (5m)**

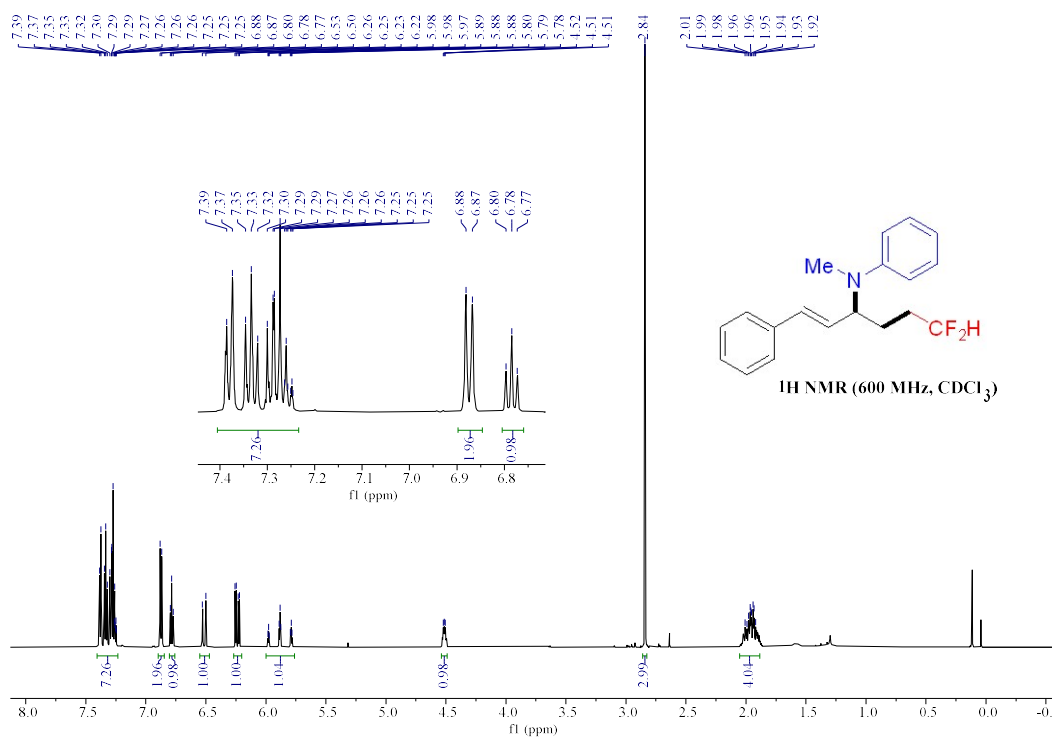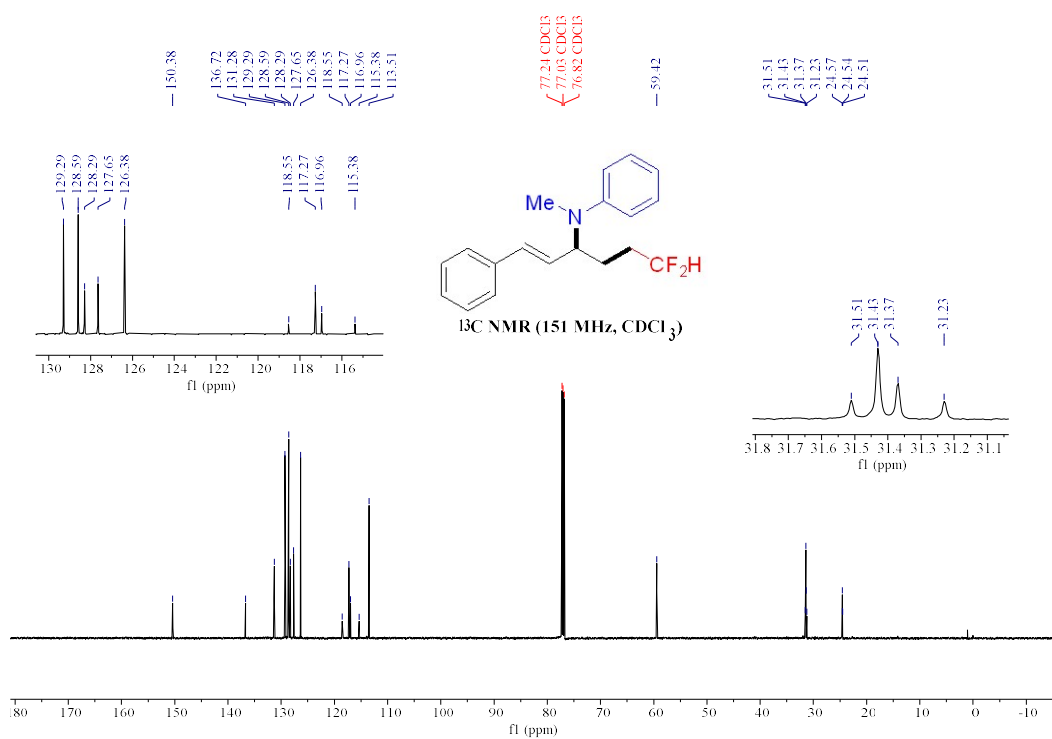

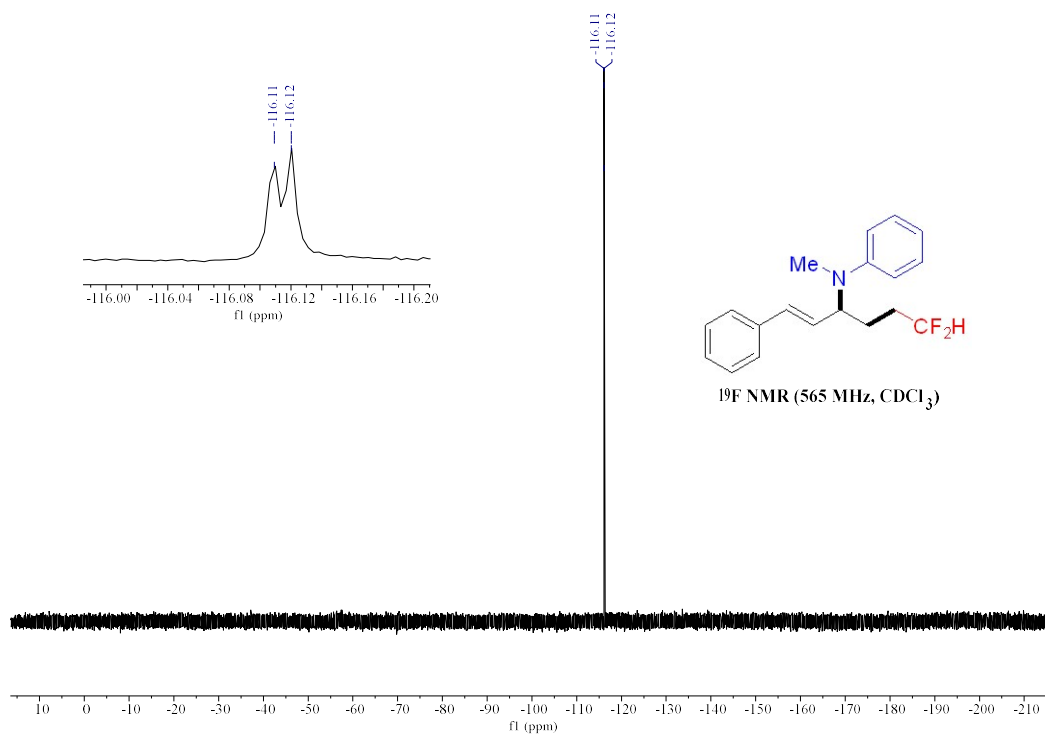

**(E)-N-(6,6-Difluoro-1-phenylhex-1-en-3-yl)aniline (5n)**

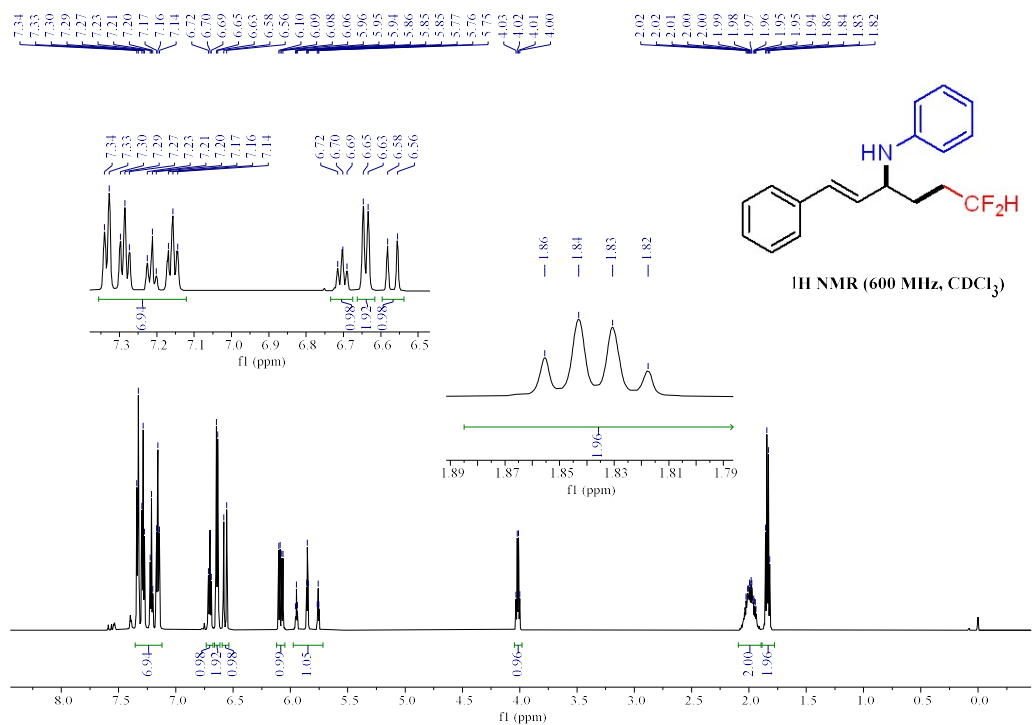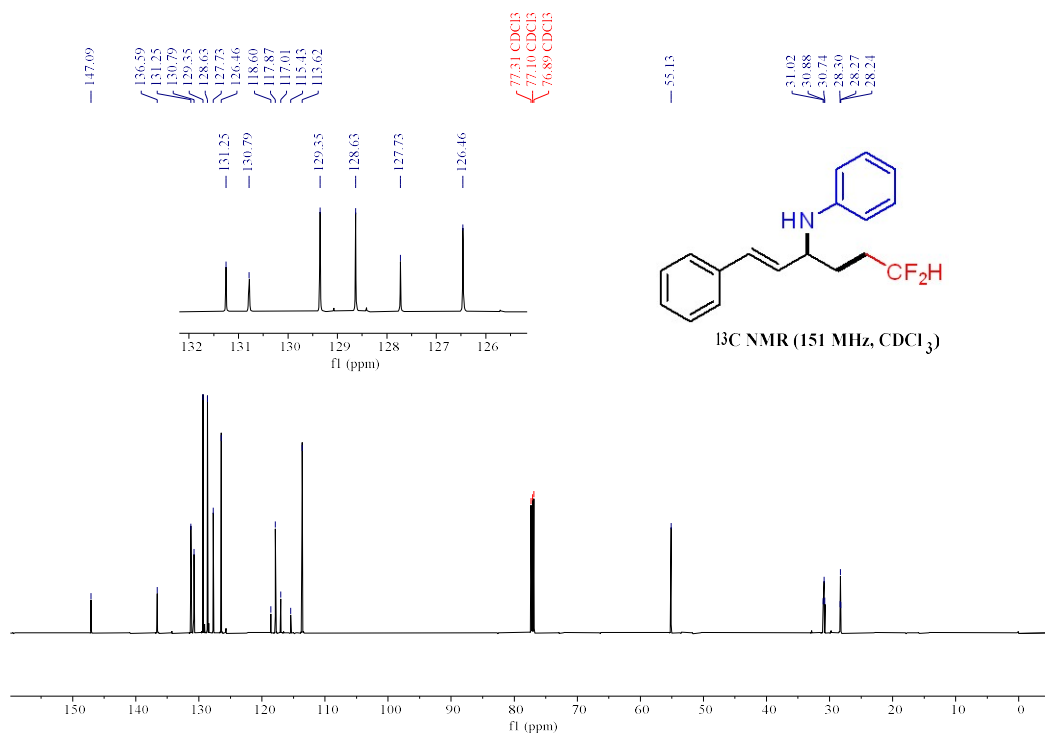

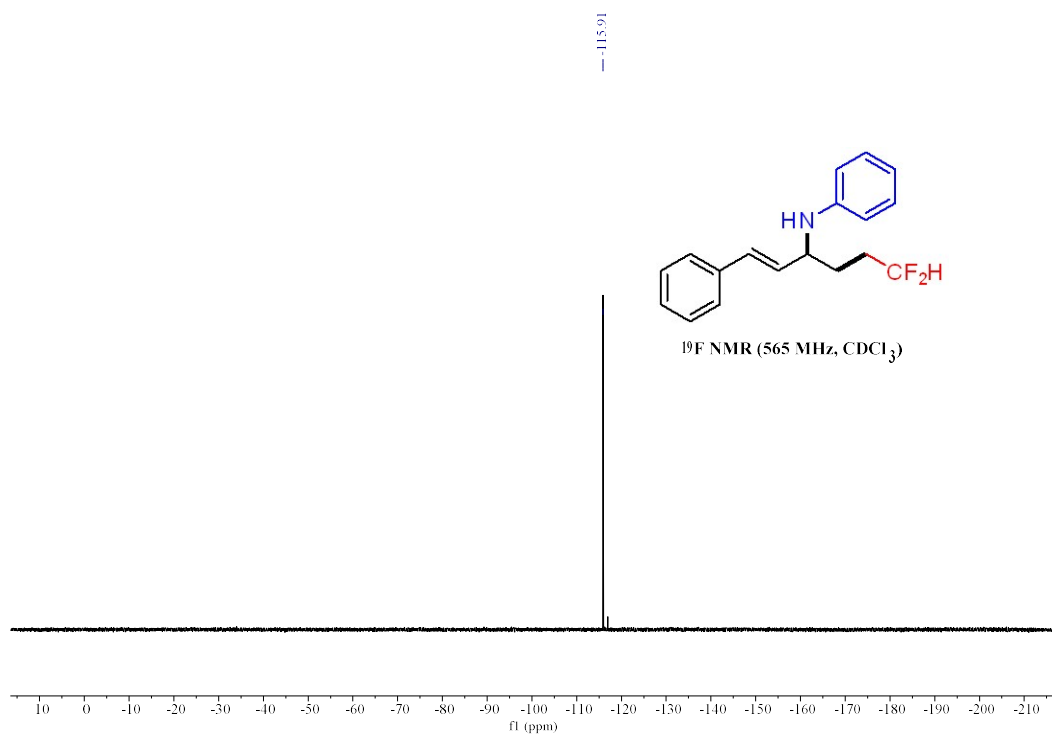



**(E)-N-Benzyl-6,6-difluoro-1-phenylhex-1-en-3-amine (5o)**

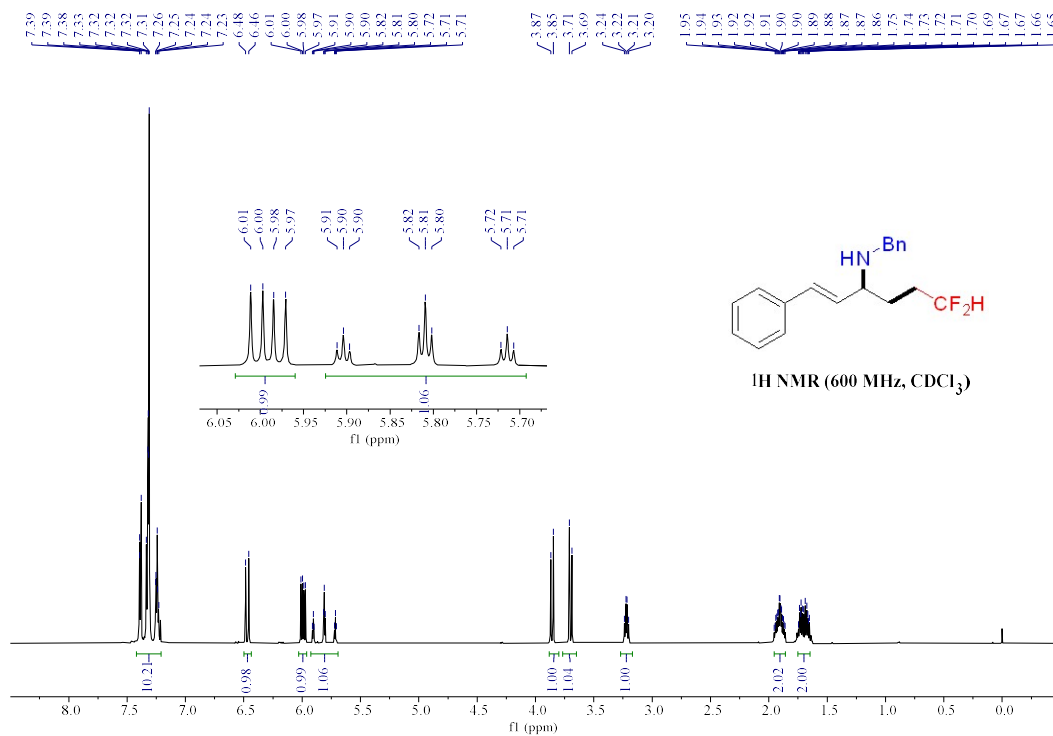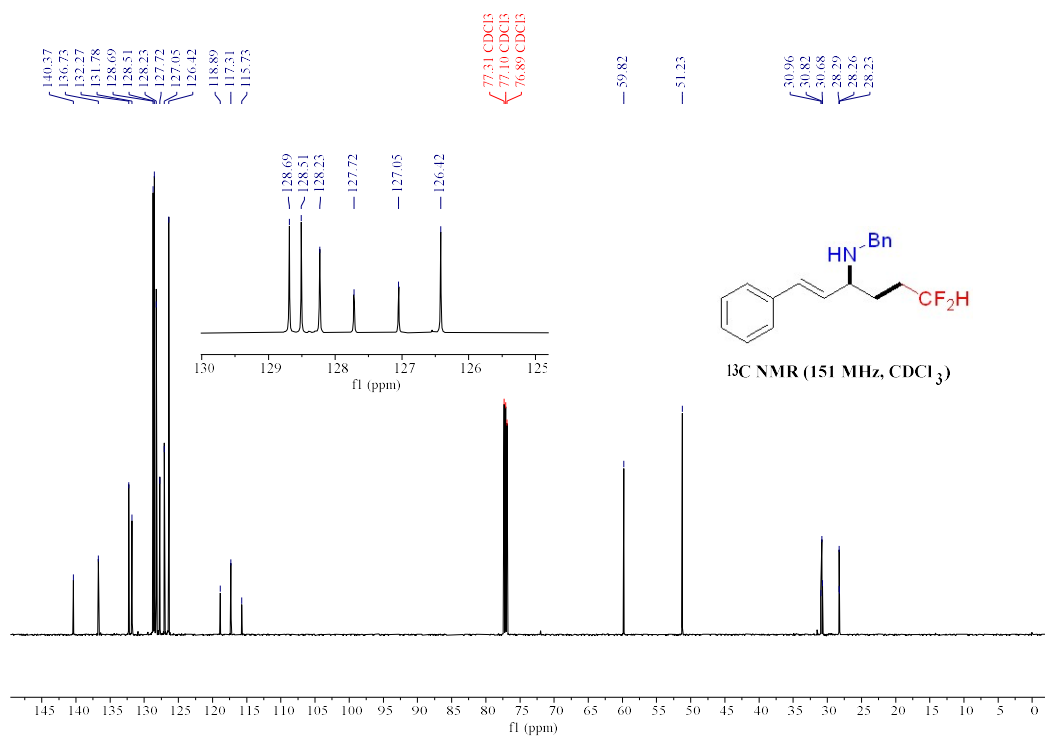

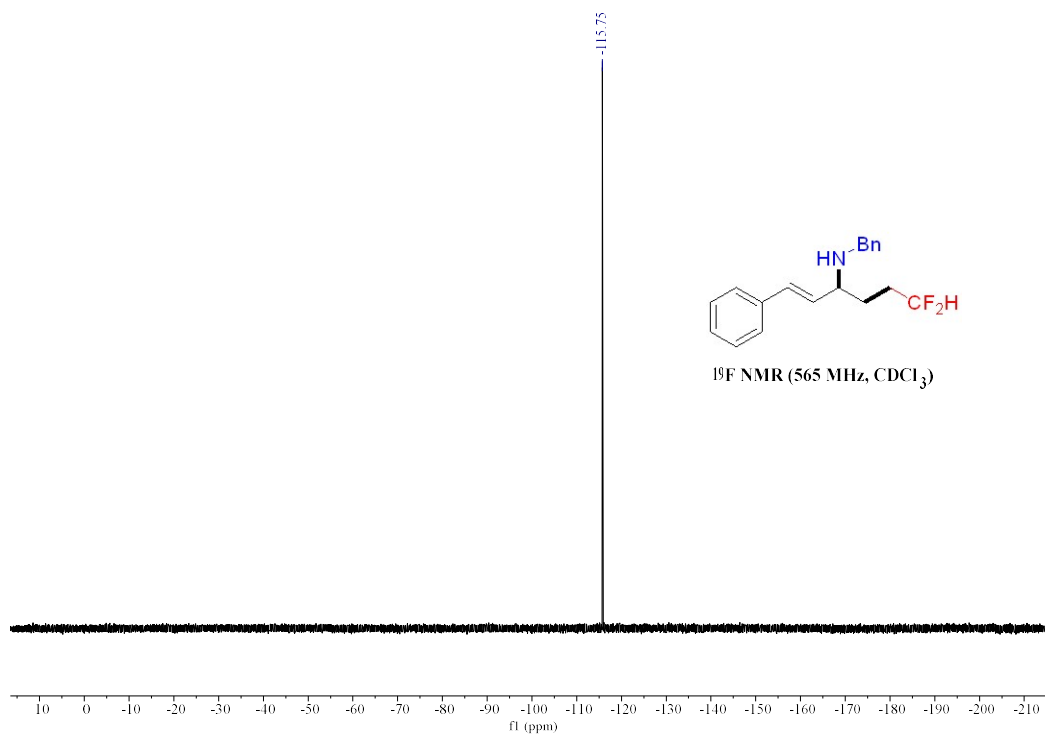

**(E)-N-Acetyl-N-(6,6-difluoro-1-phenylhex-1-en-3-yl)acetamide (5p)**

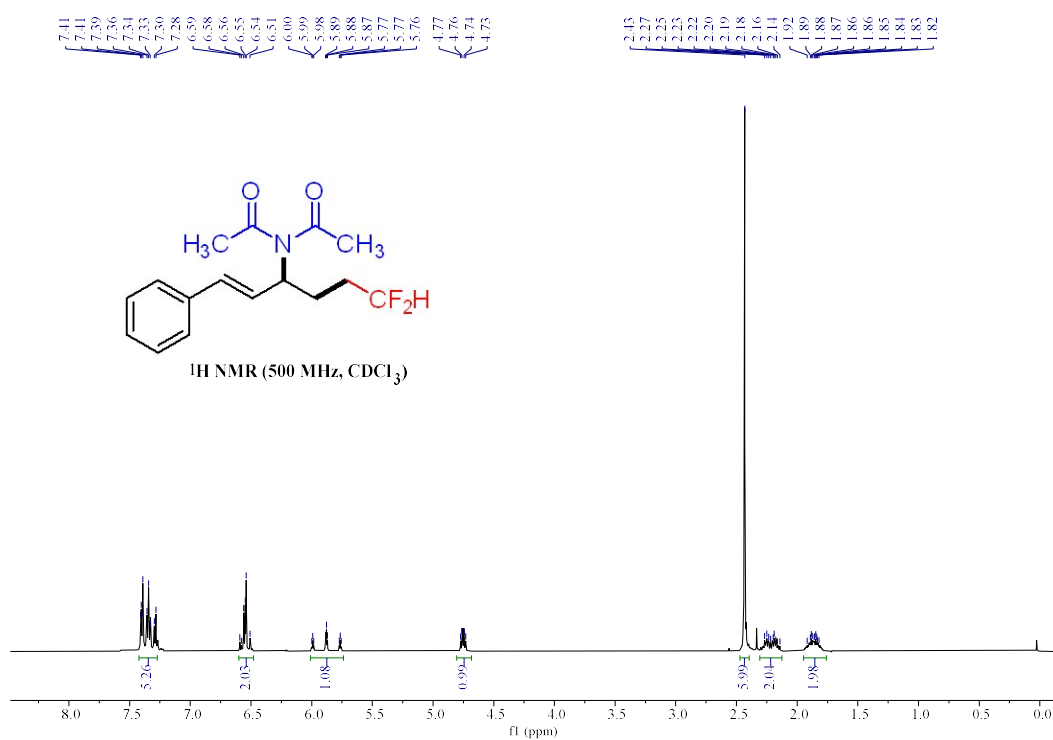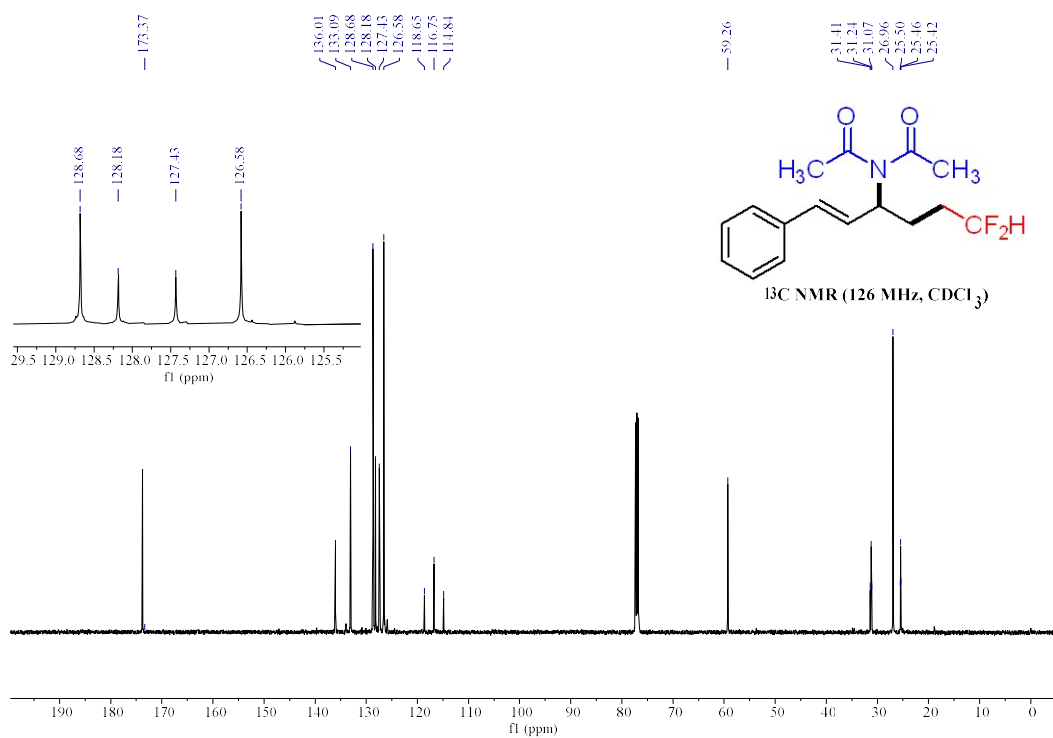

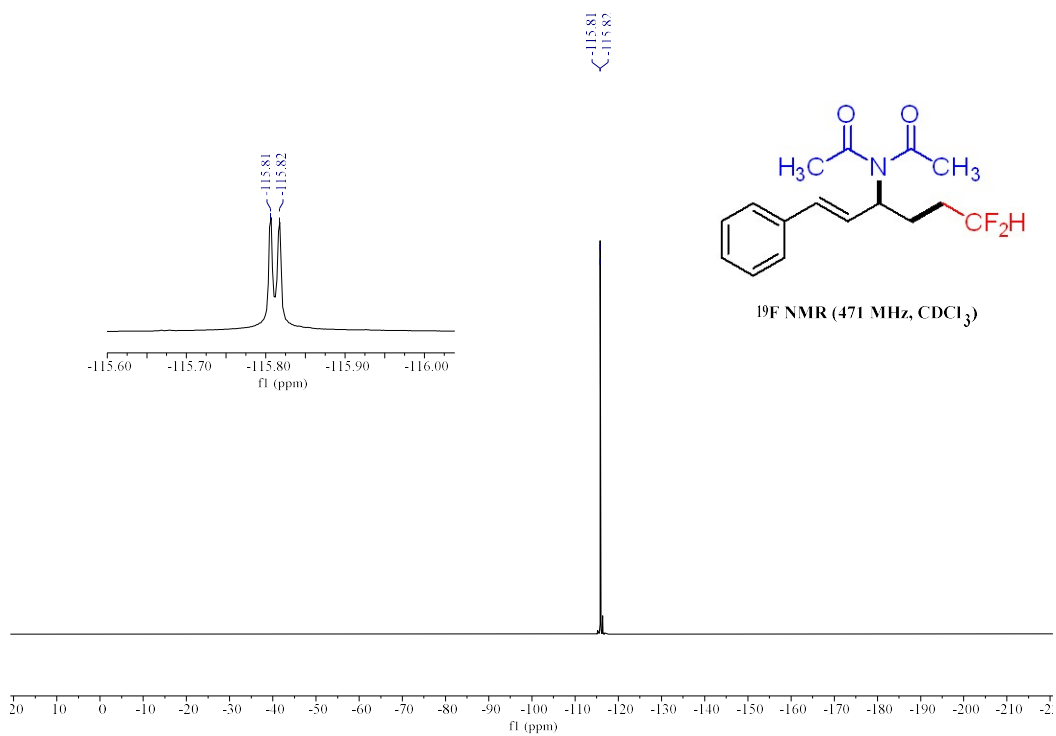

**(E)-N-Benzyl-6,6,6-trifluoro-N-methyl-1-phenylhex-1-en-3-amine (6a)**

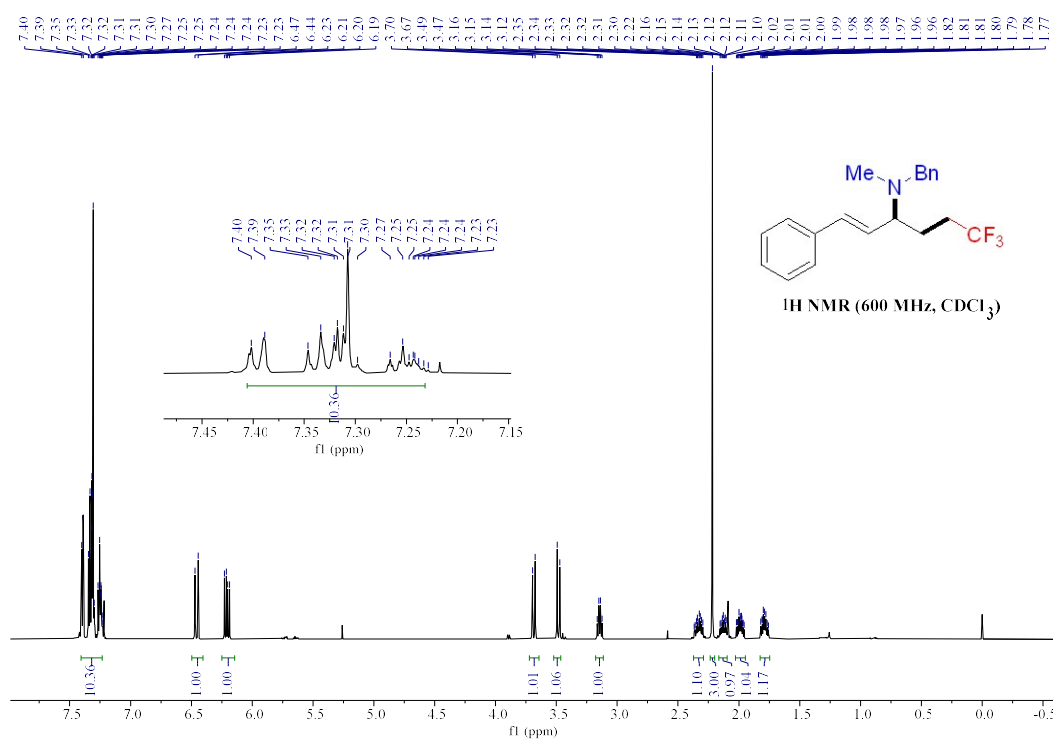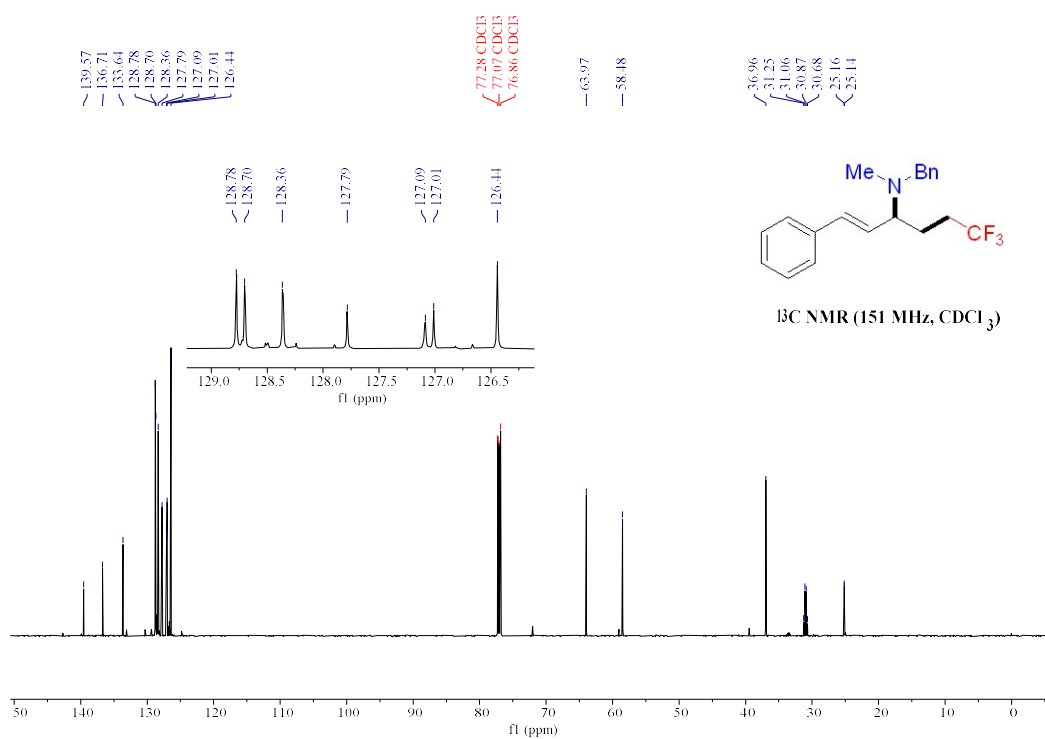

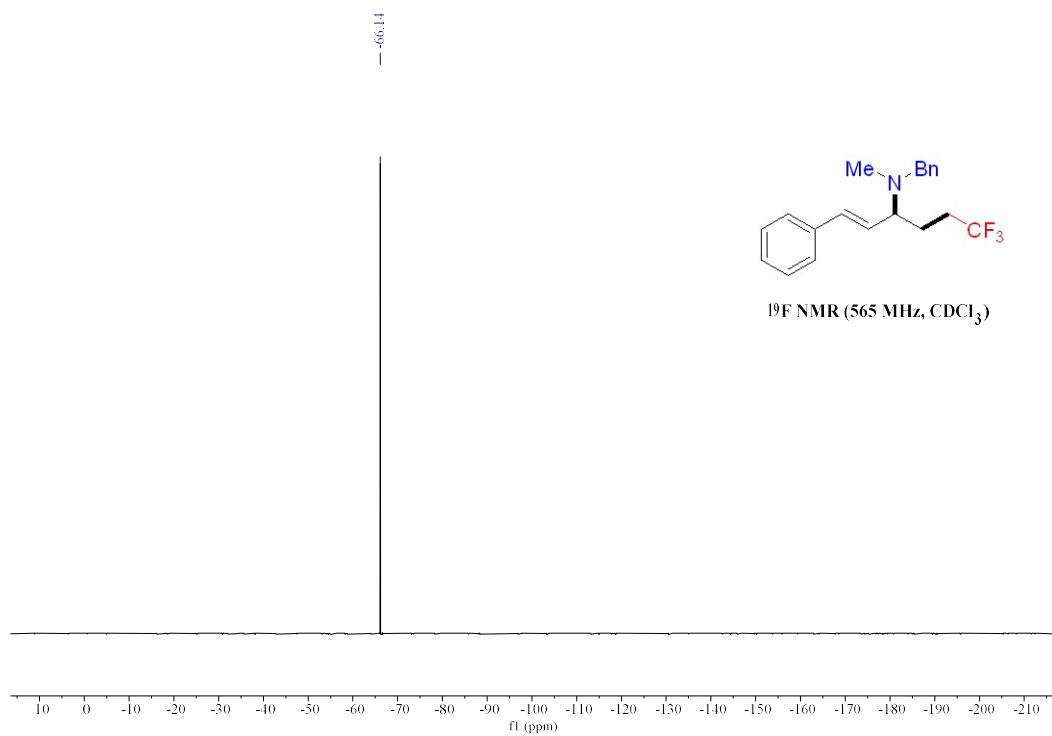

**(E)-N-benzyl-7,7,8,8,9,9,10,10,10-nonafluoro-N-methyl-1-phenyldec-1-en-3-amine (6b)**

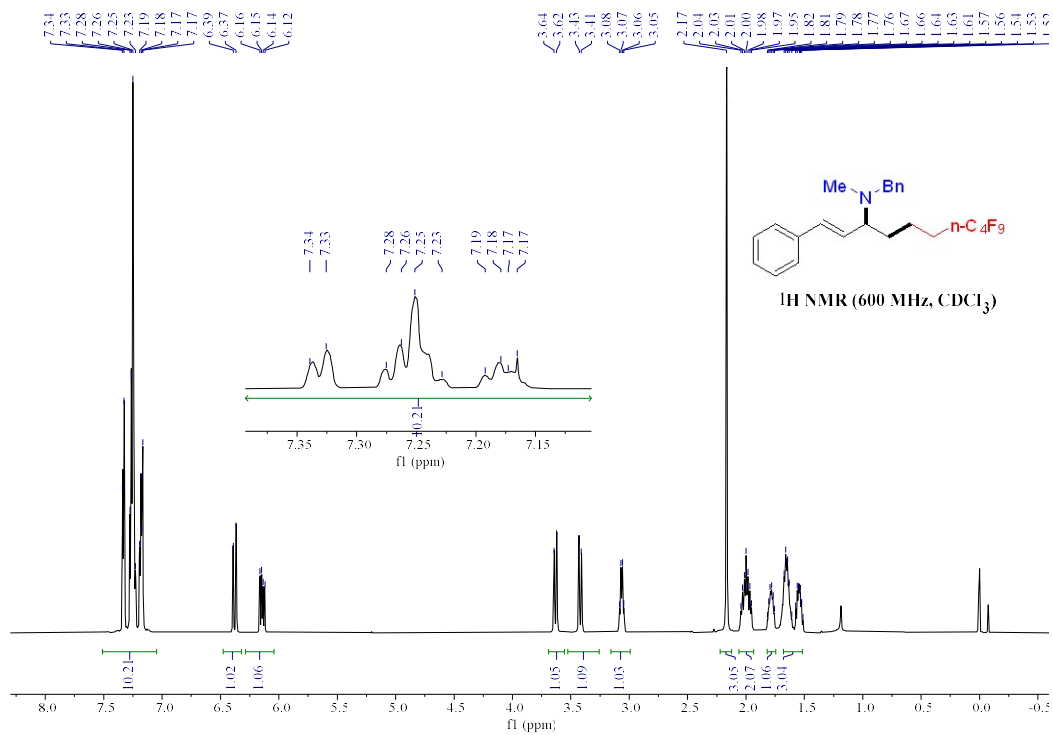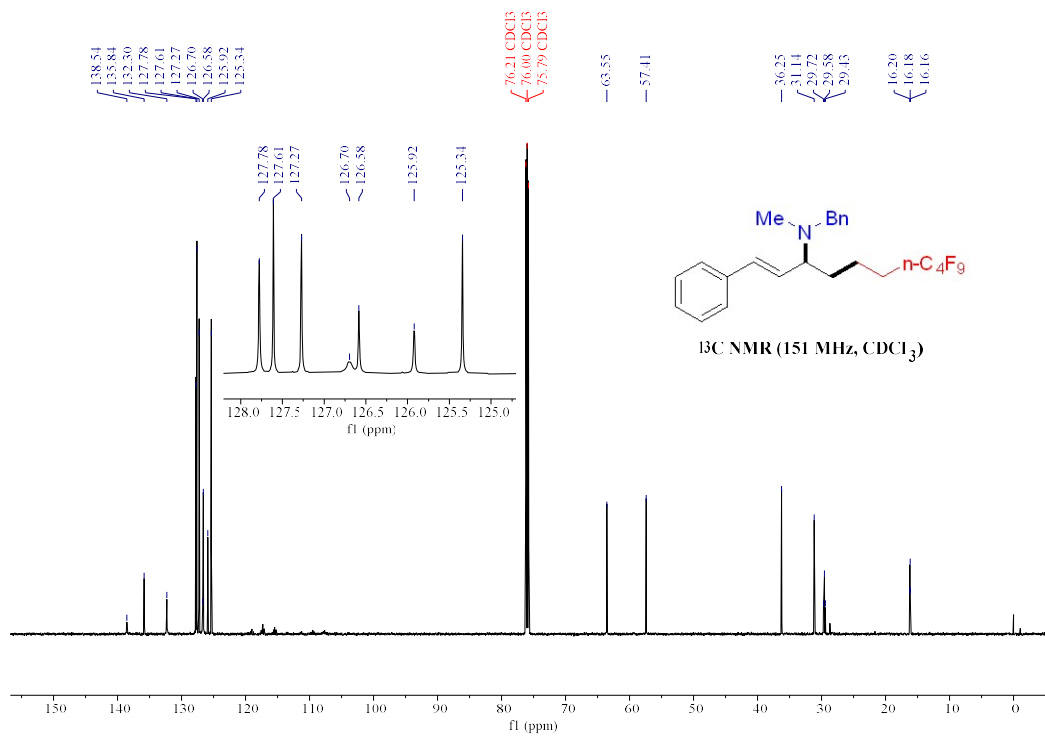

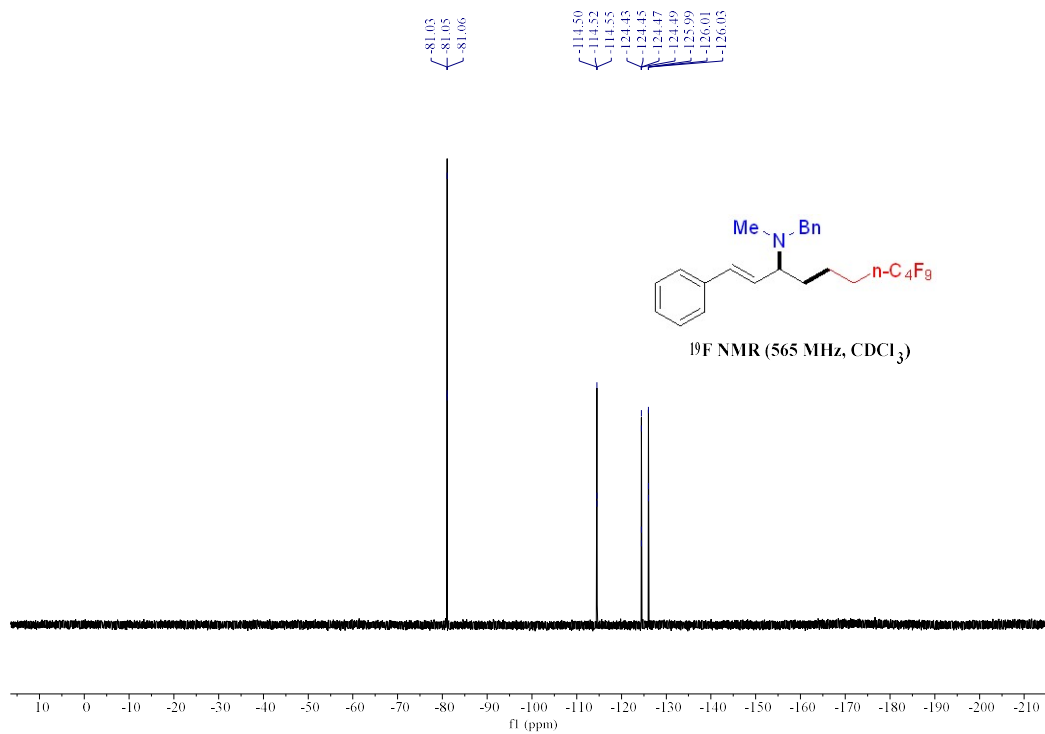



**(E)-4-(5,5,6,6,7,7,8,8,8-Nonafluoro-1-phenyloct-2-en-1-yl)morpholine (6c)**

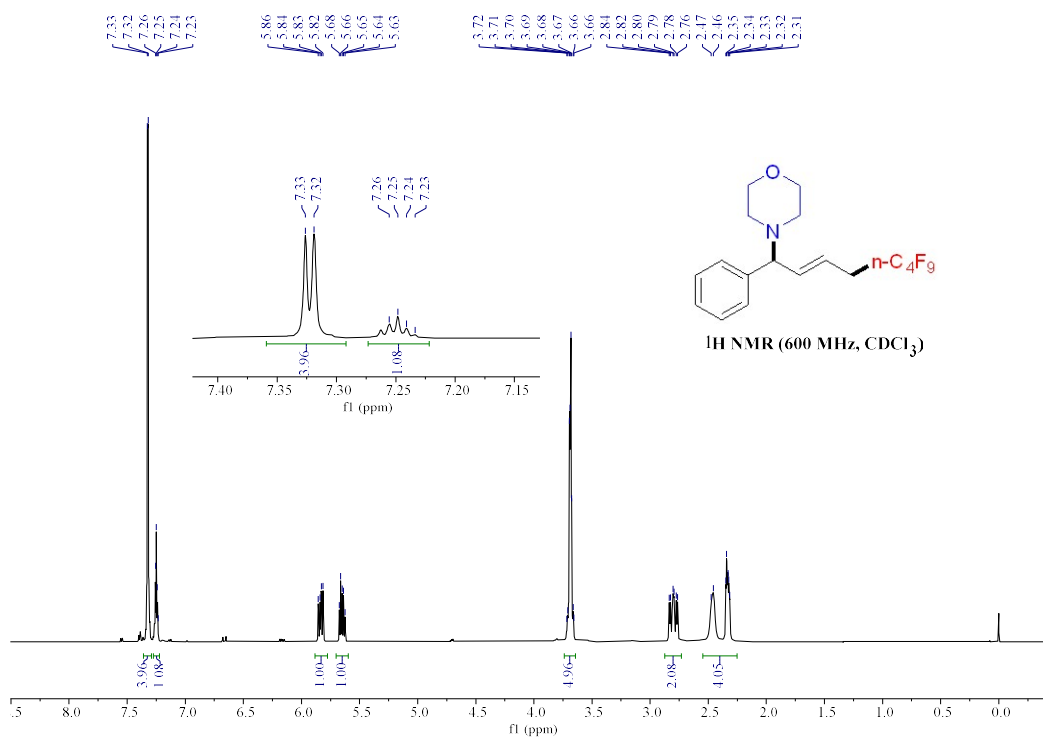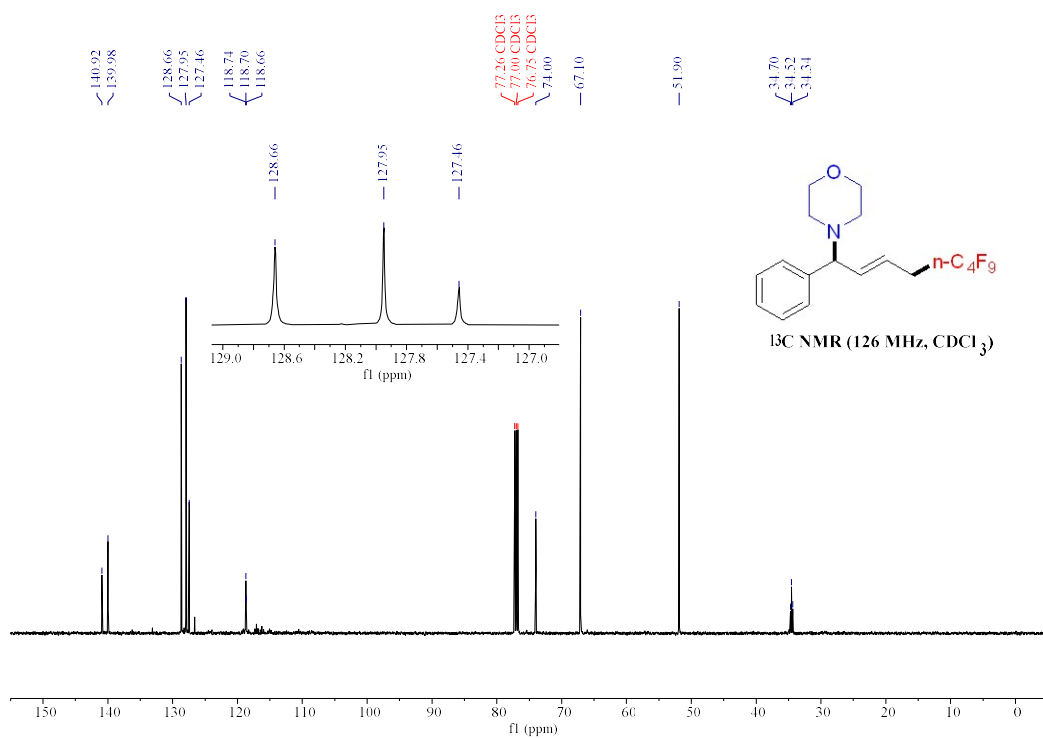

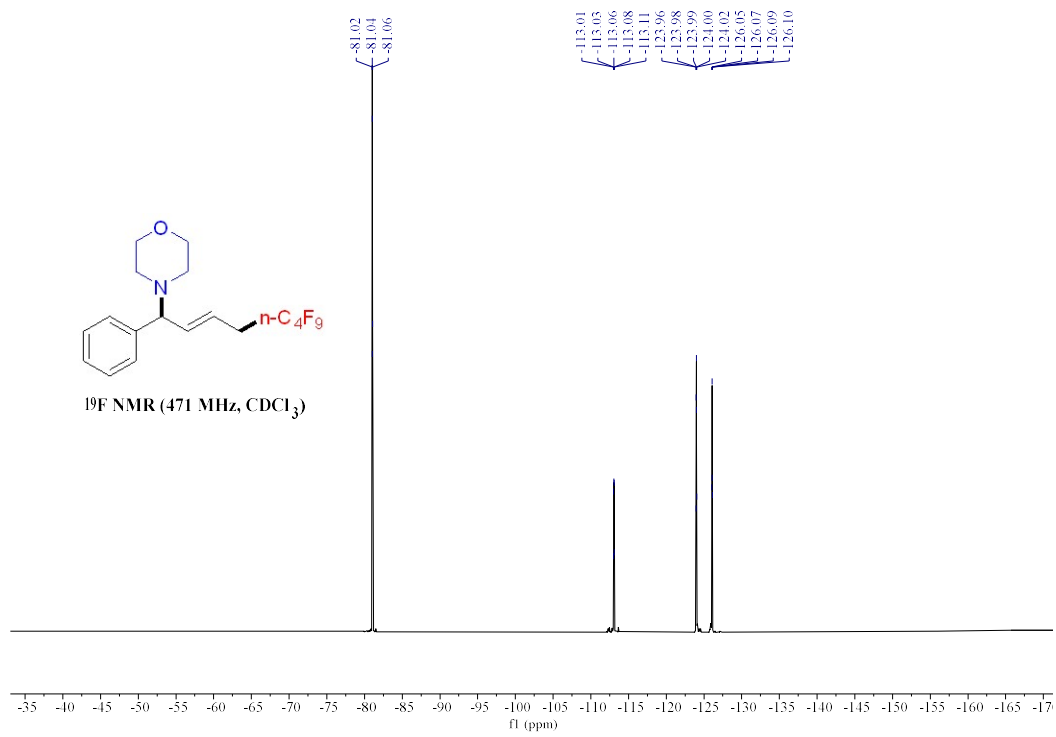

**(E)-N-Ethyl-7,7,8,8,9,9,10,10,10-nonafluoro-1-phenyl-N-(pyridin-4-ylmethyl)dec-4-en-3-amine (6d)**

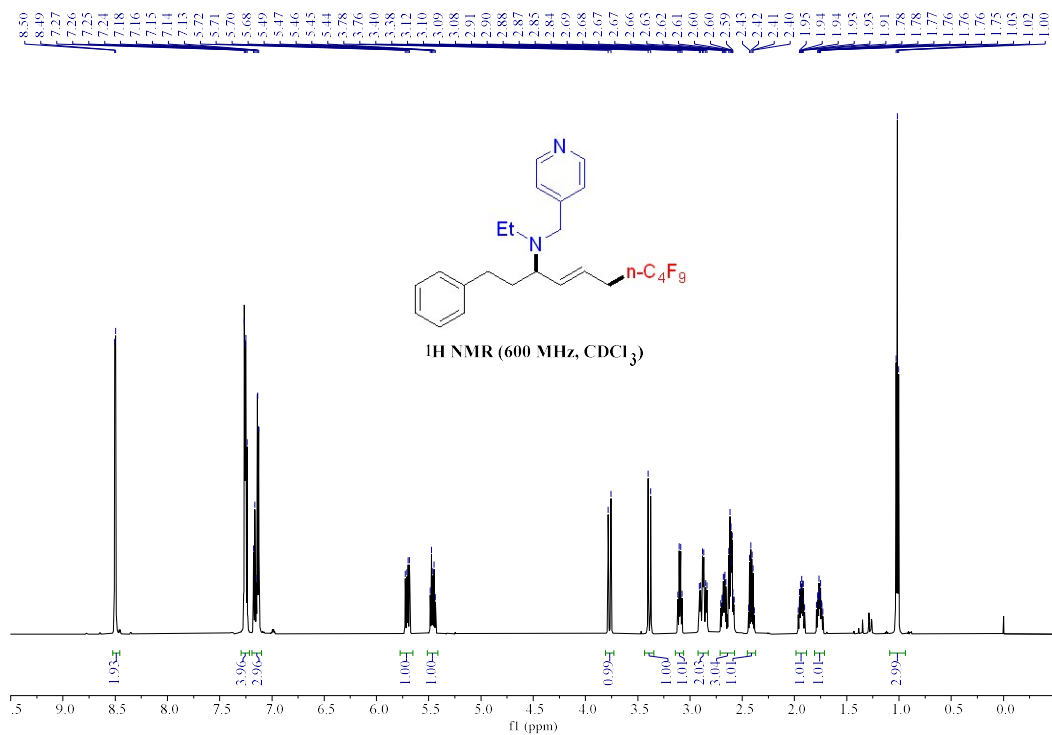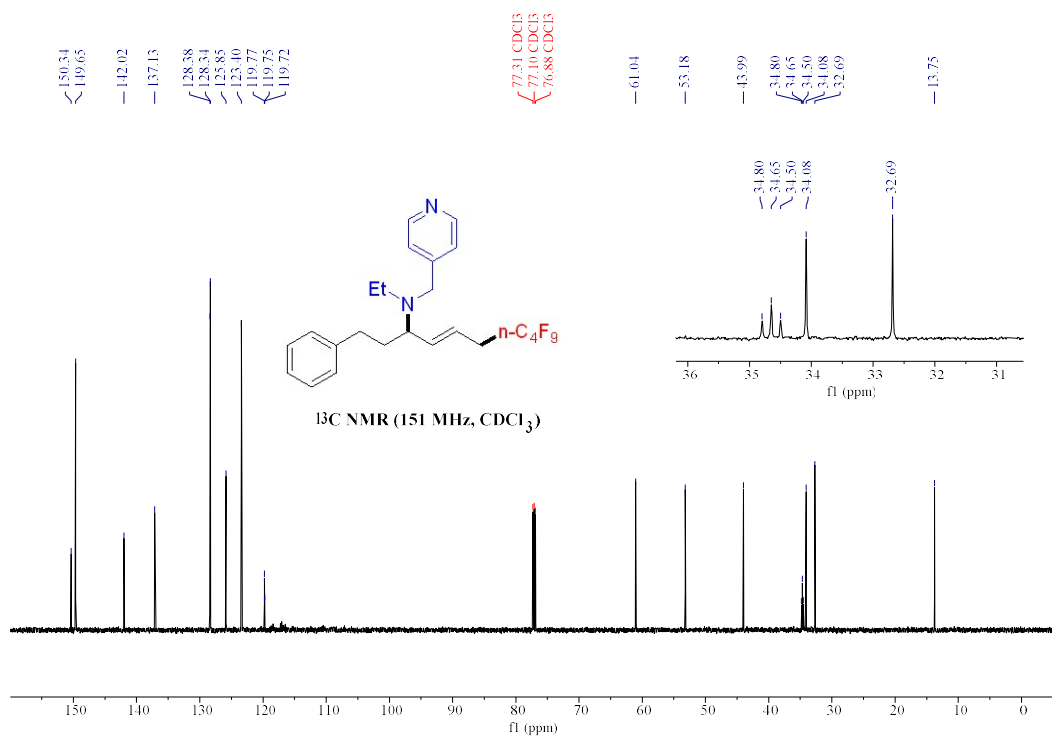

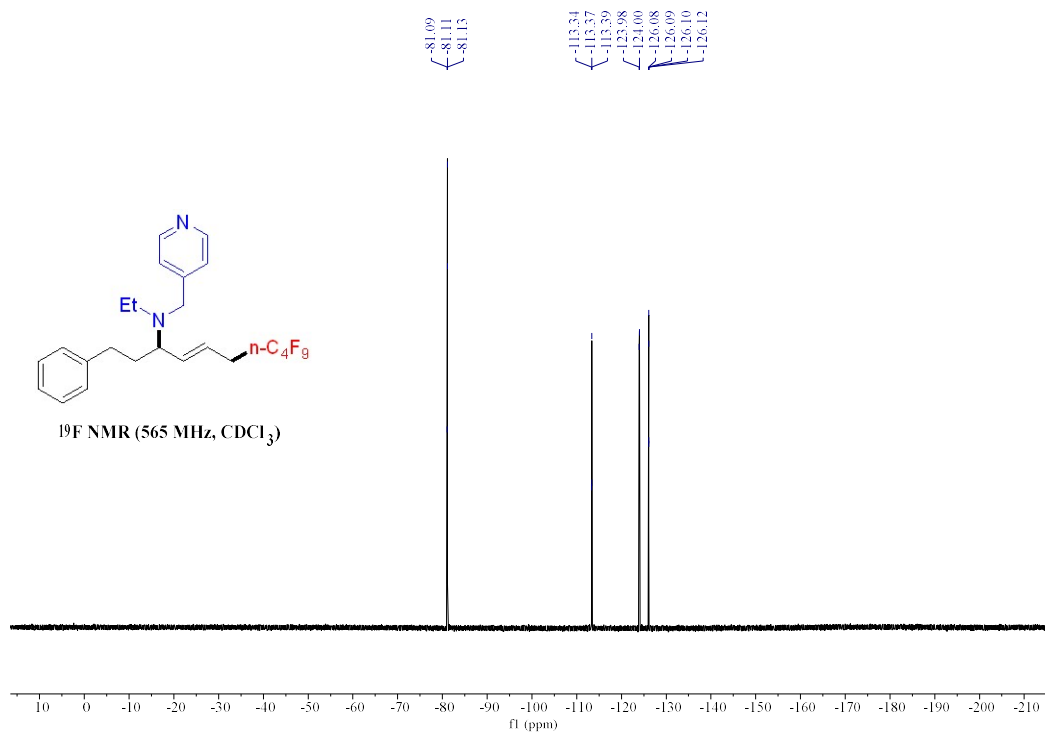

**(E)-2-(5,5,6,6,7,7,8,8,8-Nonafluoro-1-(pyridin-3-yl)oct-2-en-1-yl)-1,2,3,4-tetrahydroquinoline (6e)**

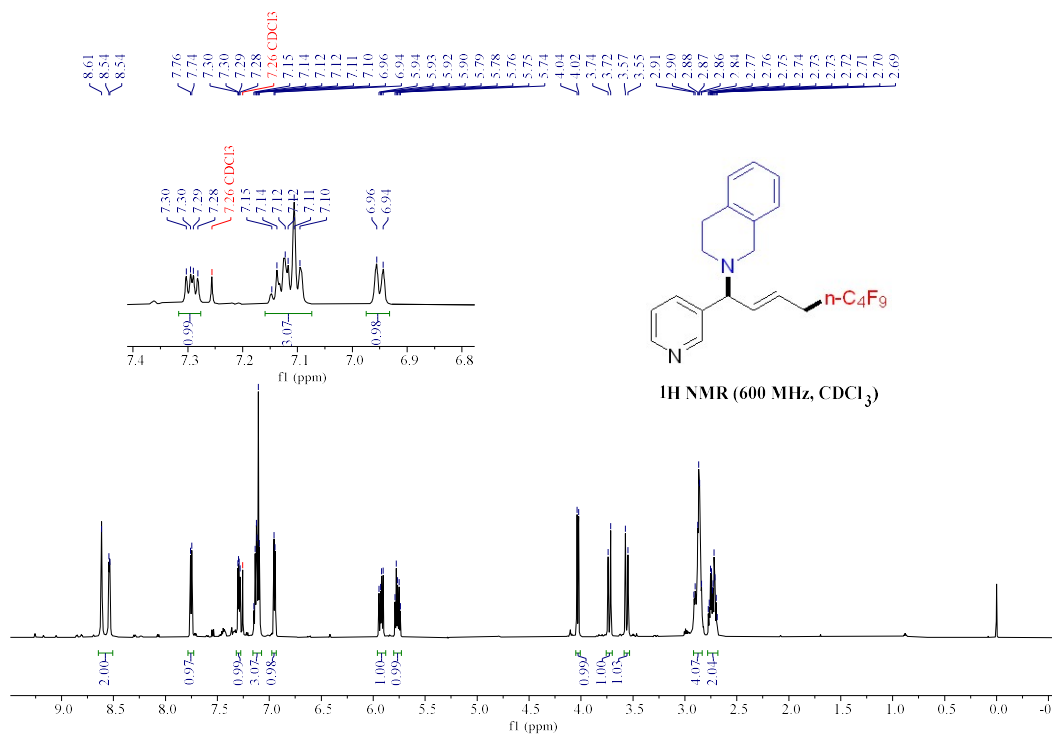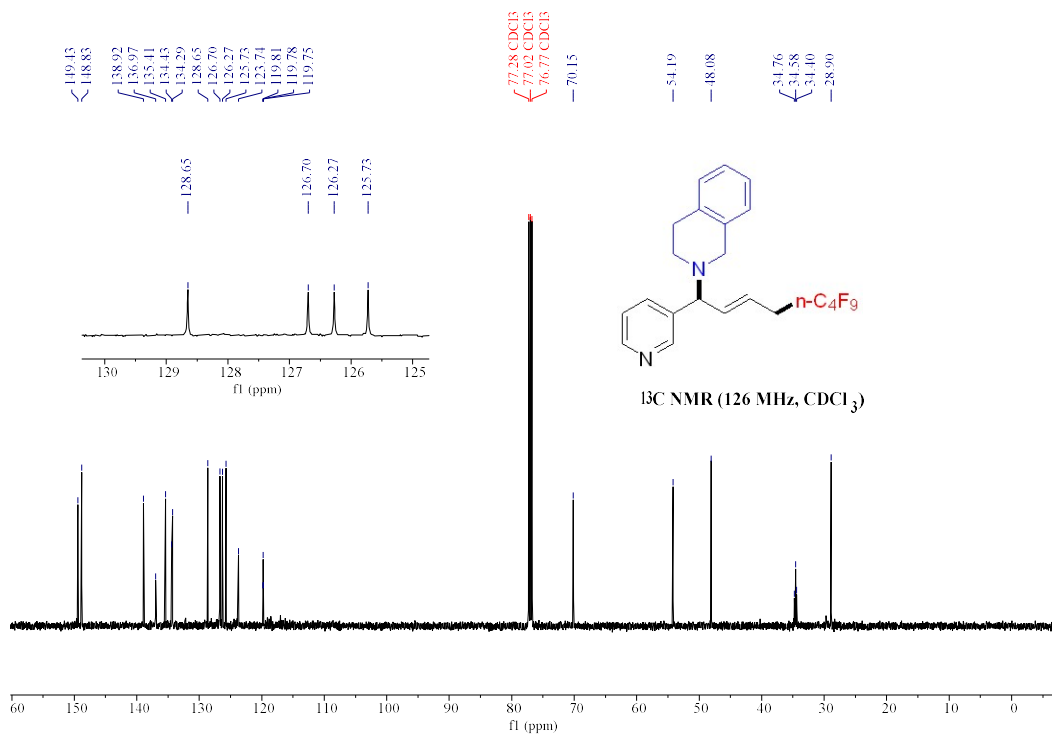

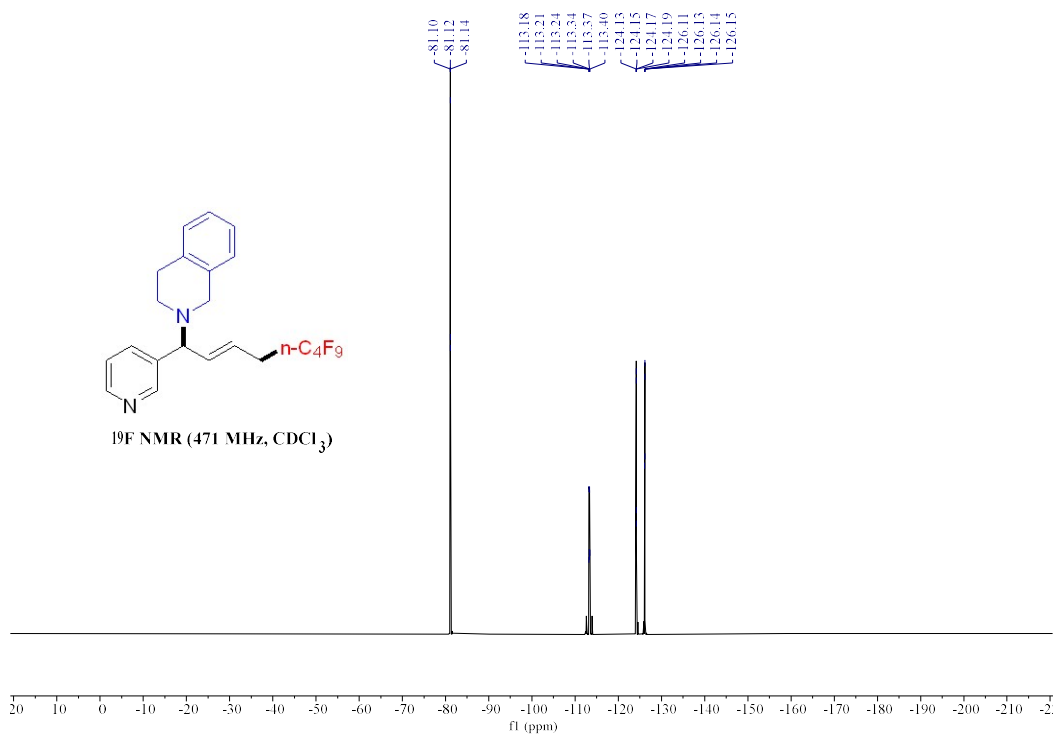

**(E)-2-(1-(Benzo[b]thiophen-3-yl)-5,5,6,6,7,7,7-heptafluorohept-2-en-1-yl)-1,2,3,4-tetrahydroisoquinoline (6f)**

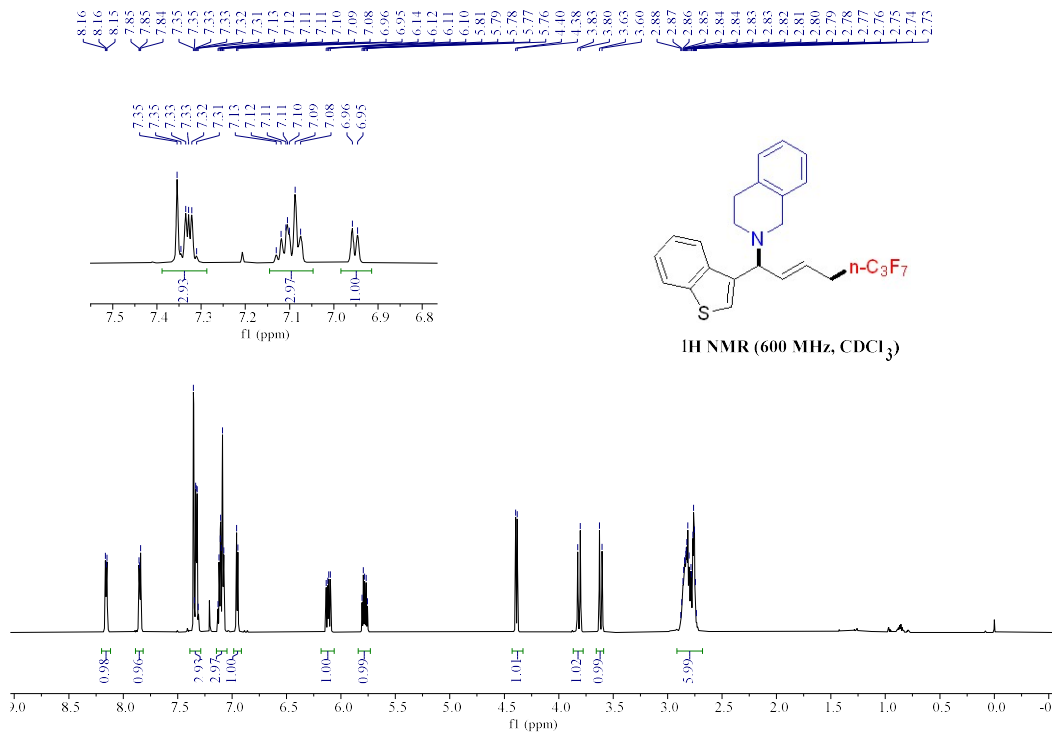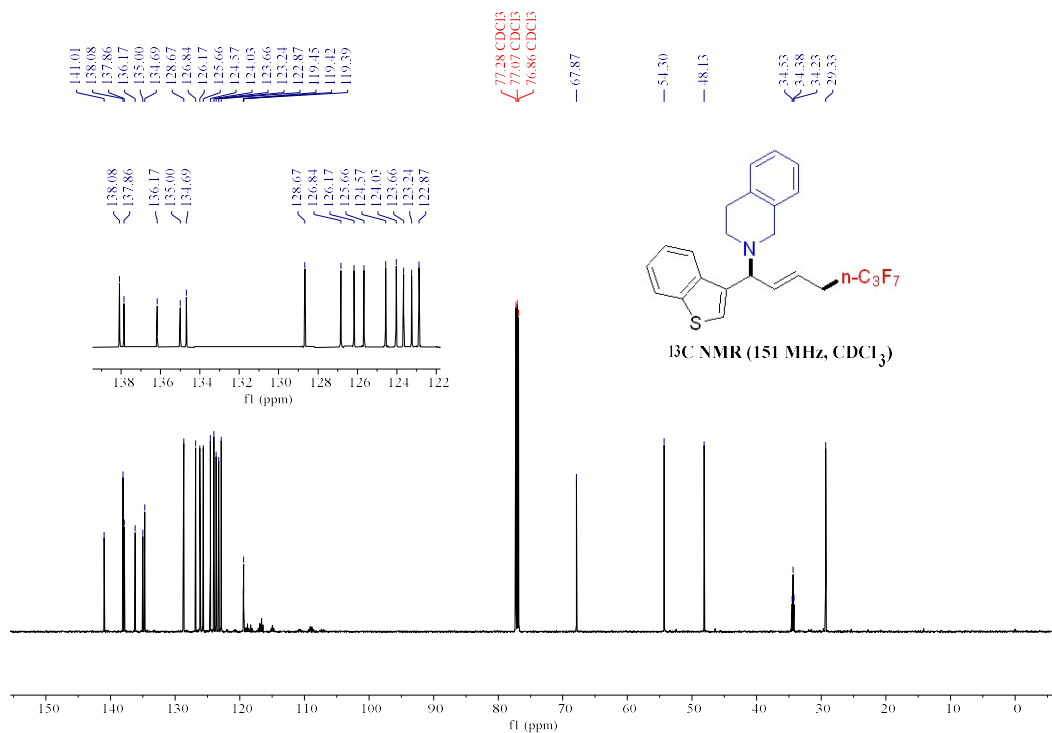

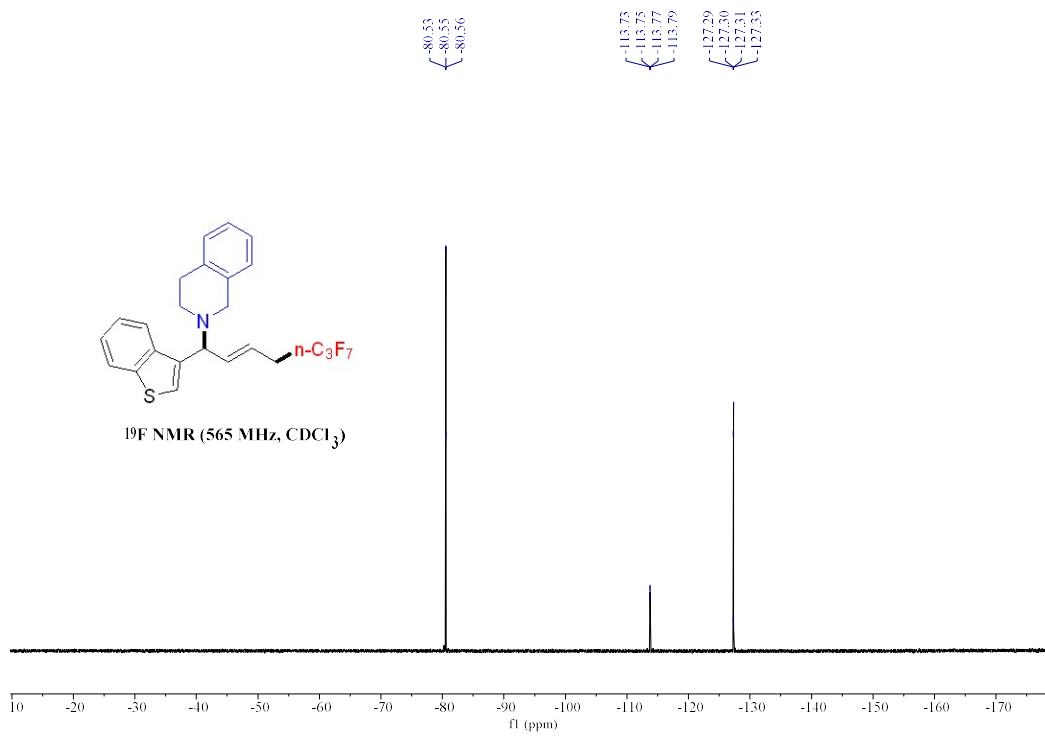



**(E)-N-Benzyl-5,5,6,6,7,7,8,8,9,9,10,10,10-tridecafluoro-N-methyl-1-phenyldec-2-en-1-amine (6g)**

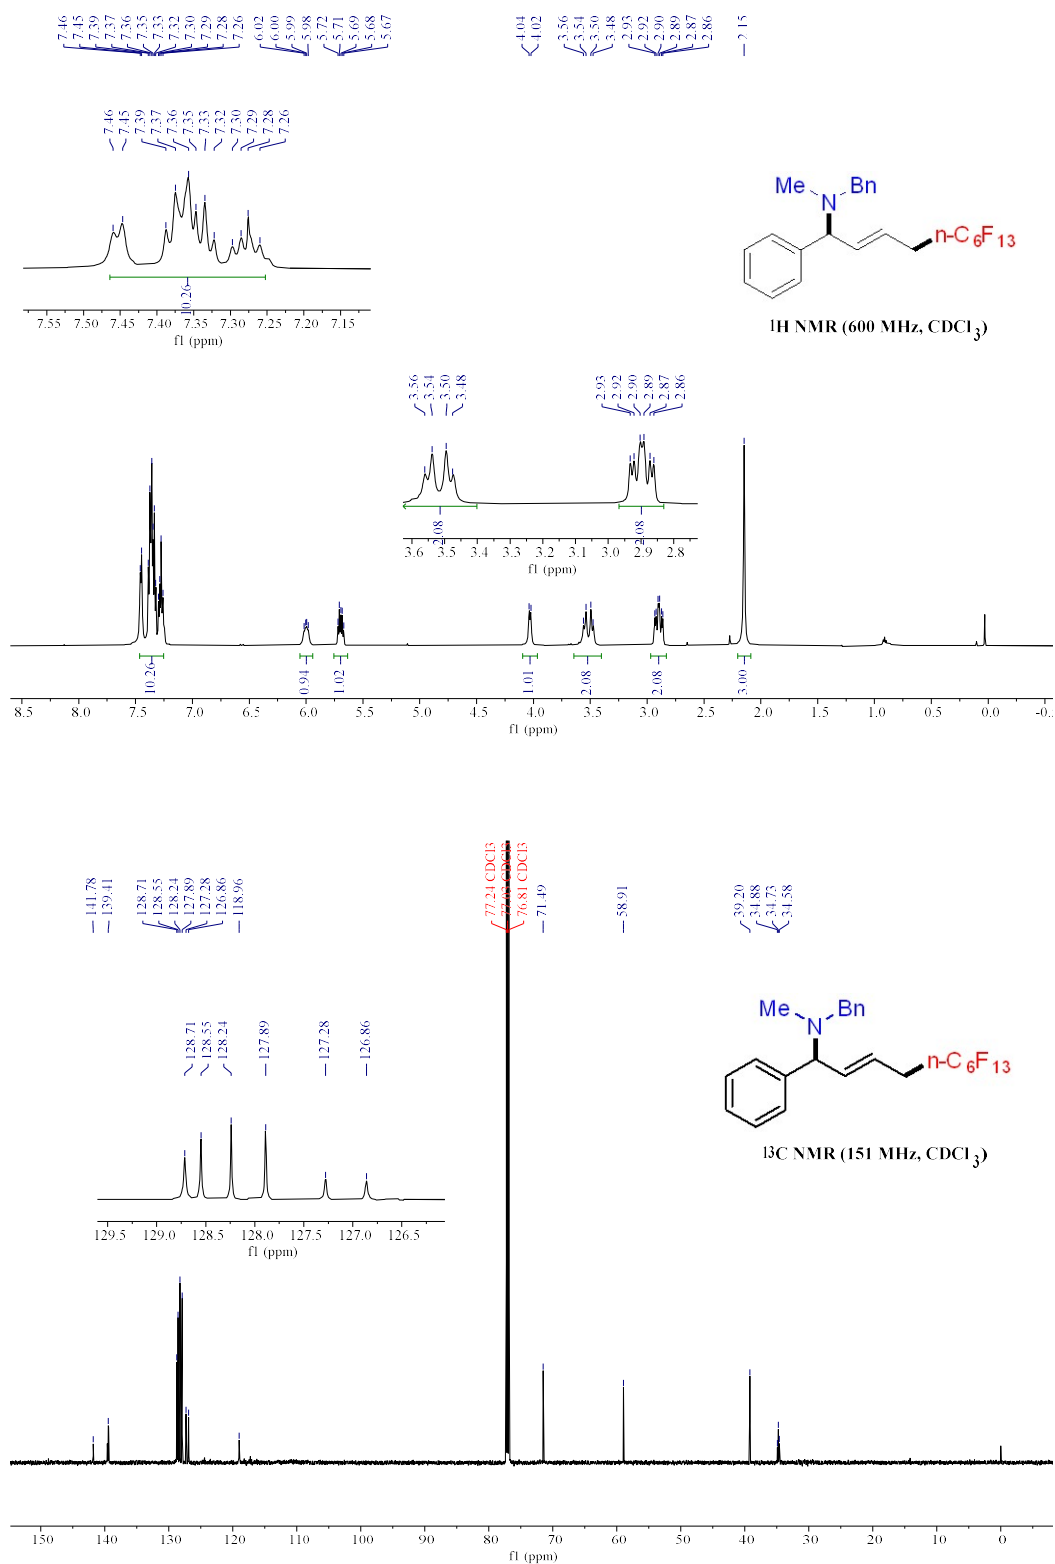

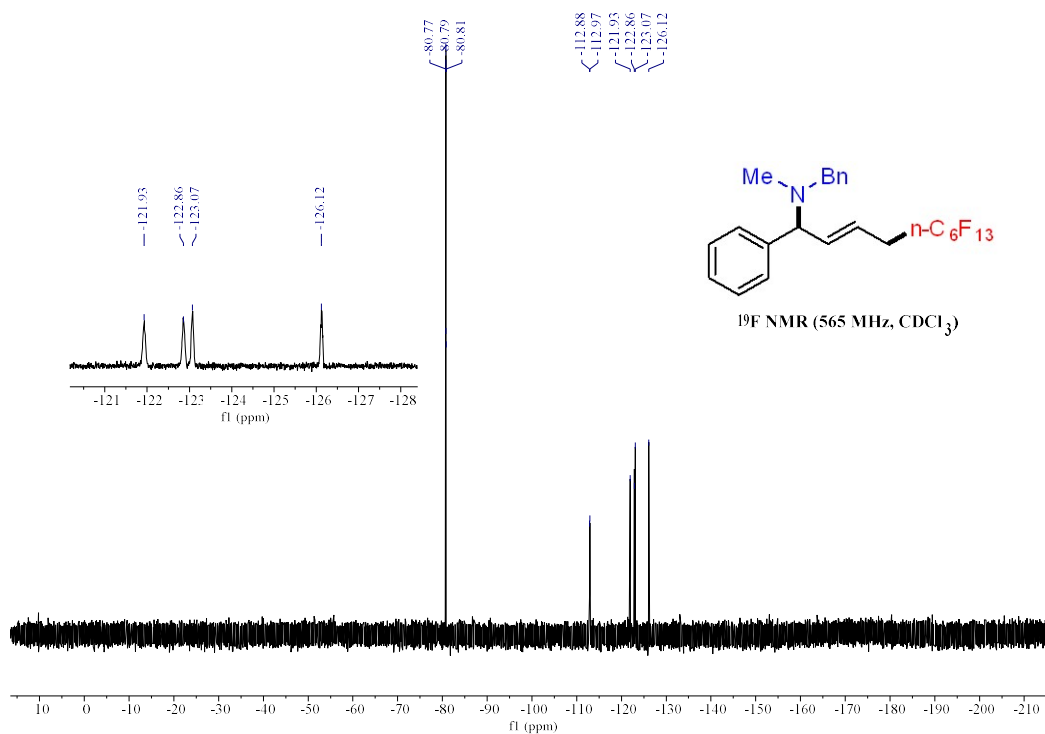

**Ethyl (*E*)-6-(benzyl(methyl)amino)-2,2-difluoro-6-phenylhex-4-enoate (6h)**

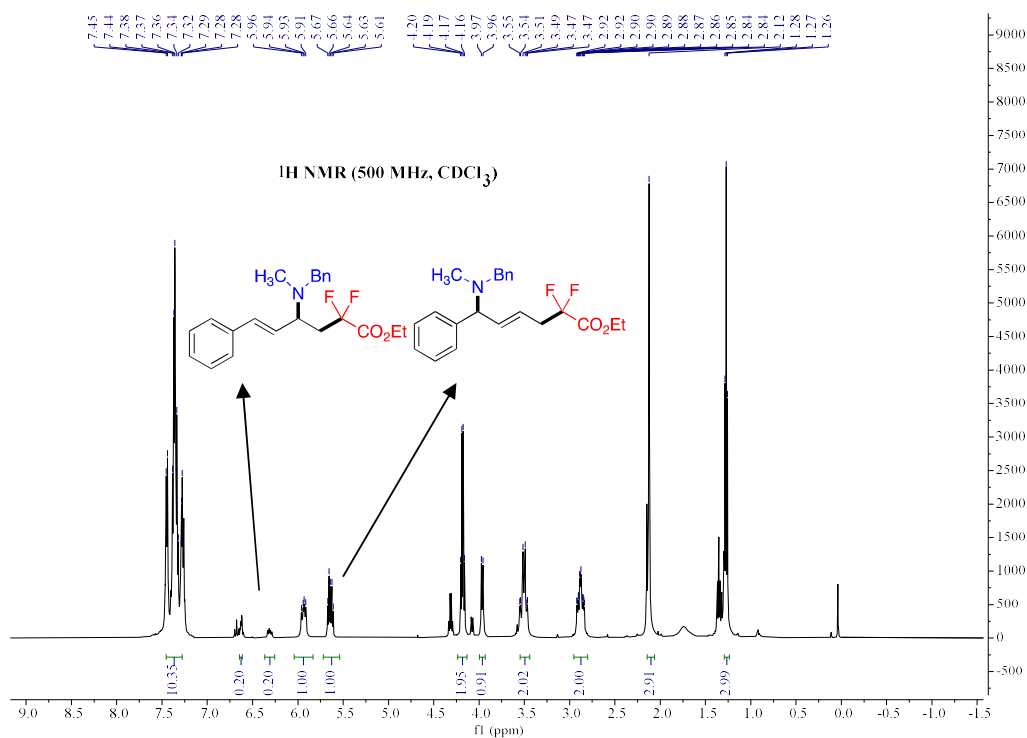

S

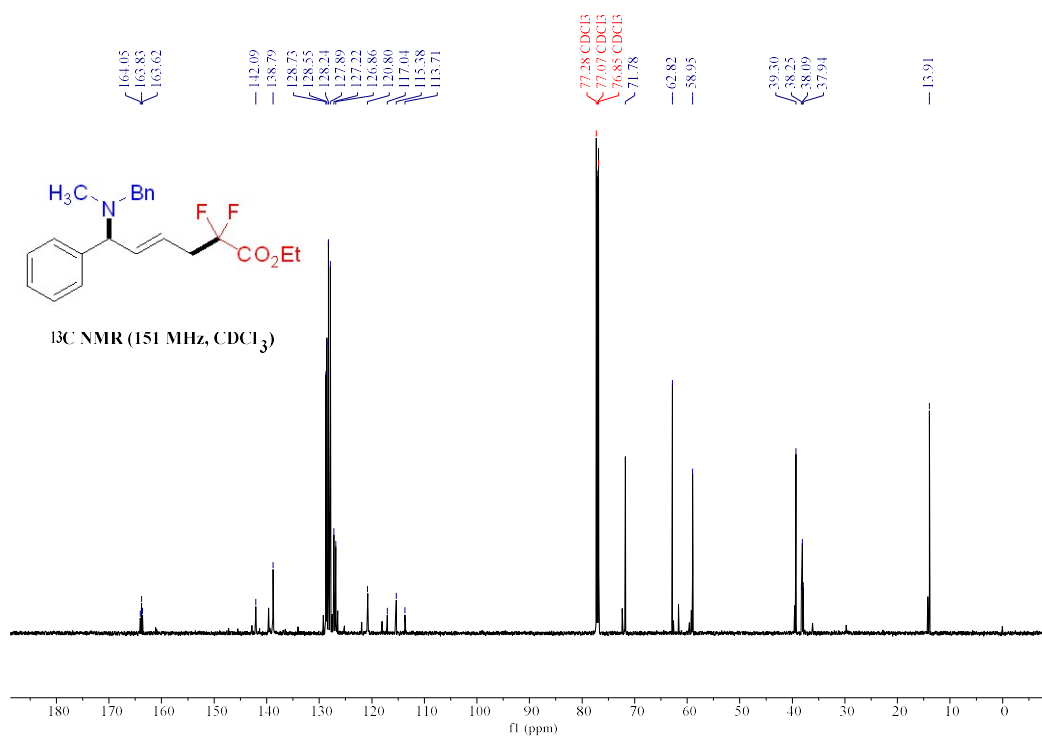

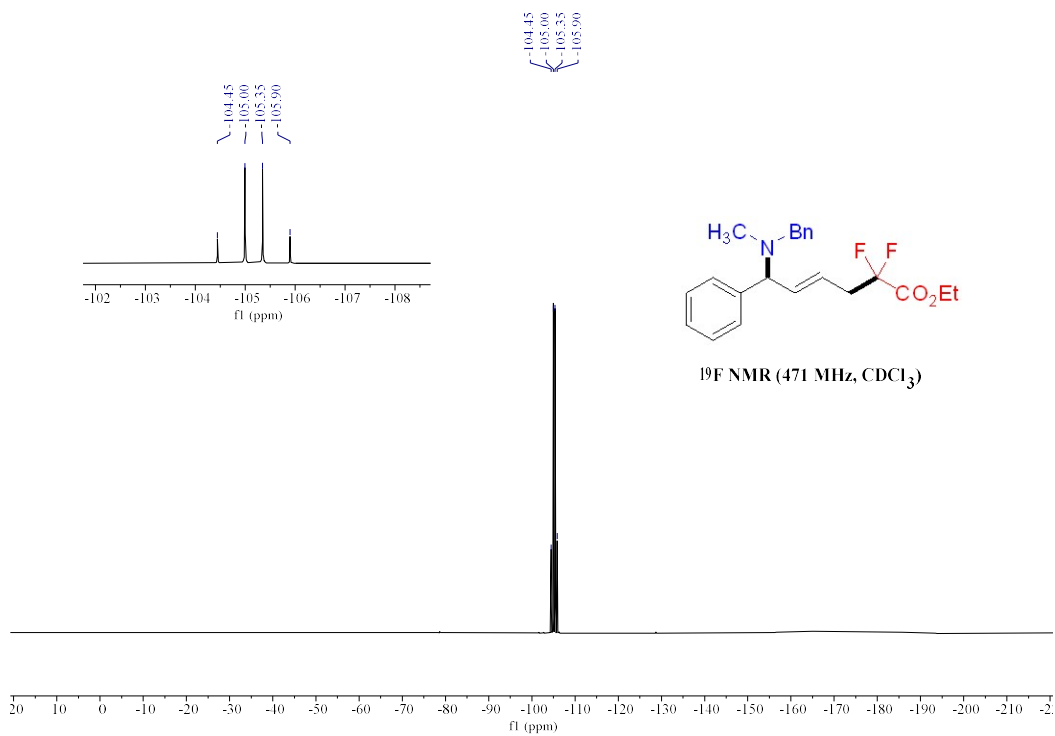

**(E)-3,3-Difluoro-1-phenyl-5-styrylpyrrolidin-2-one (8a)**

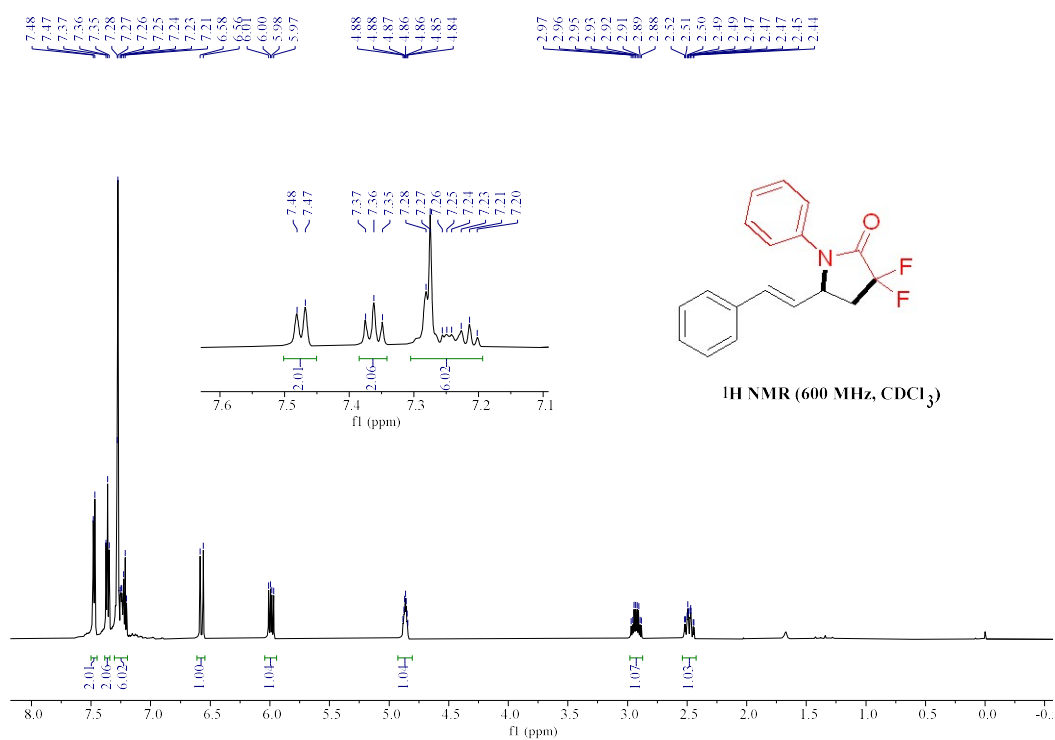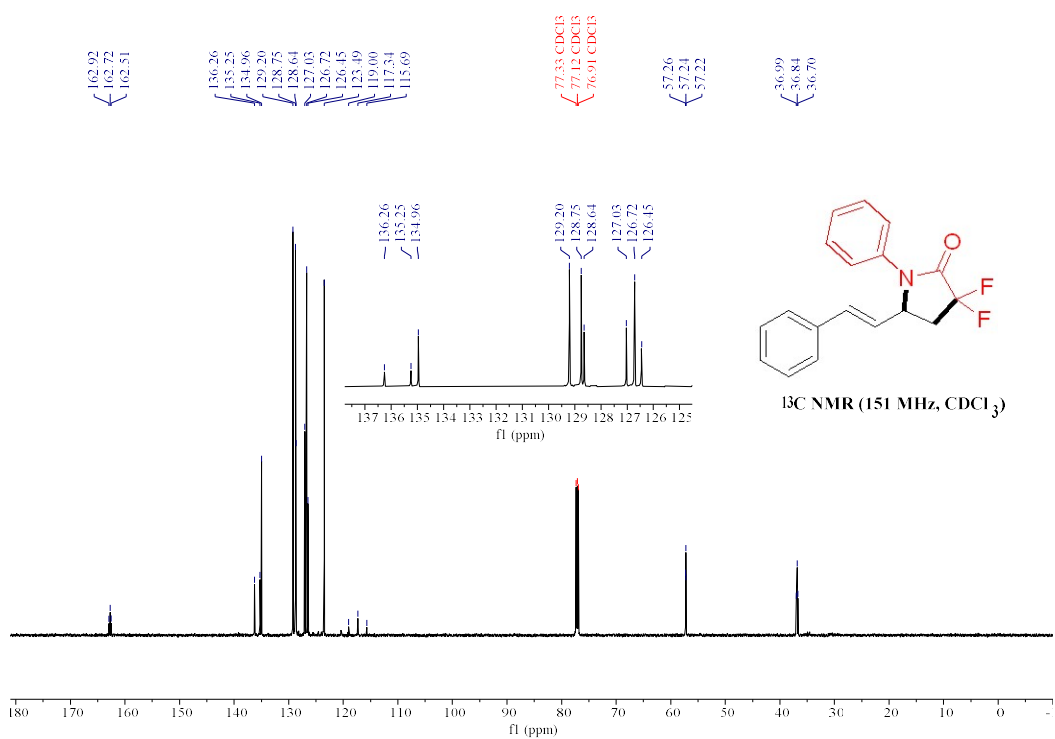

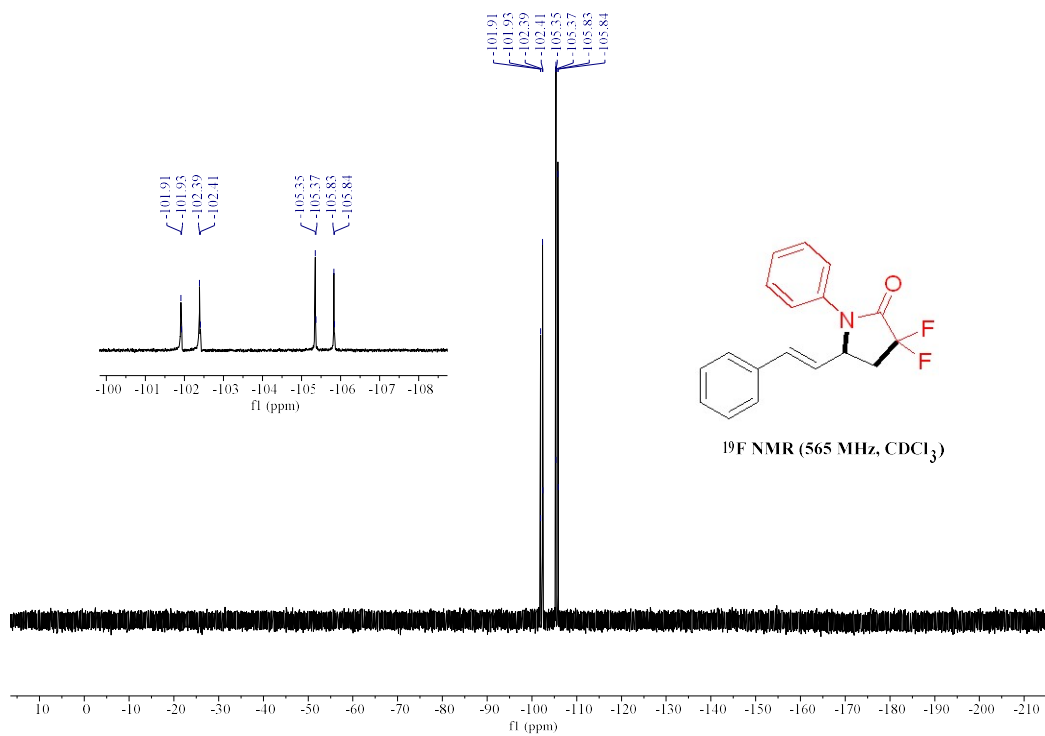

**(E)-3,3-Difluoro-5-(4-fluorostyryl)-1-phenylpyrrolidin-2-one (8b)**

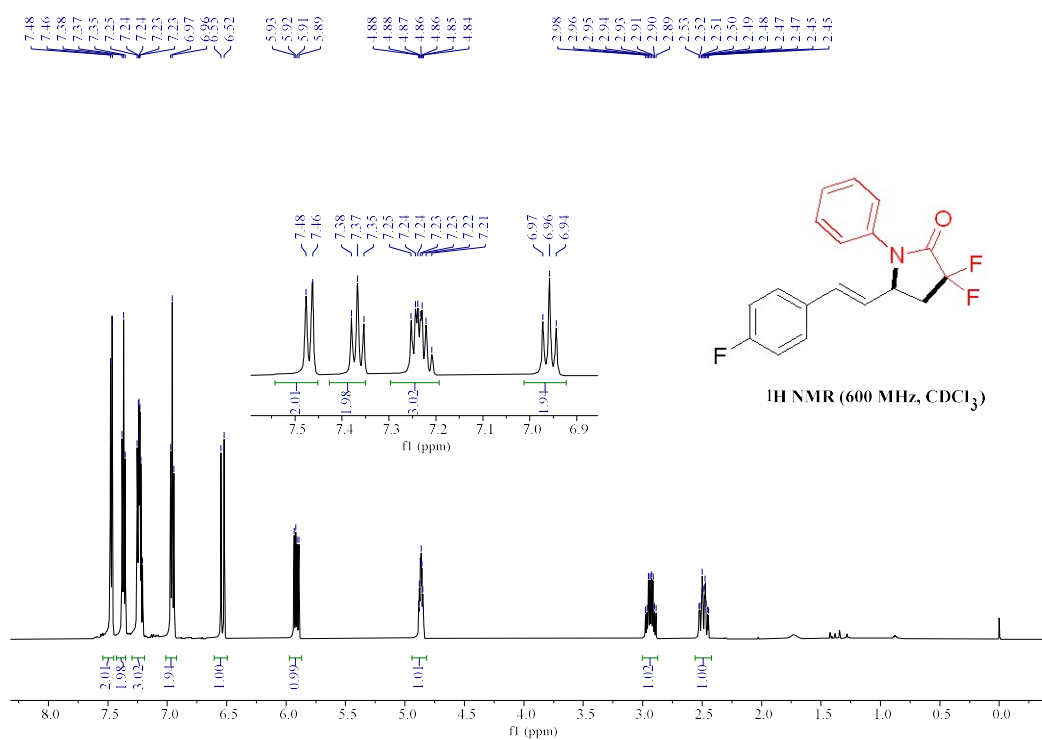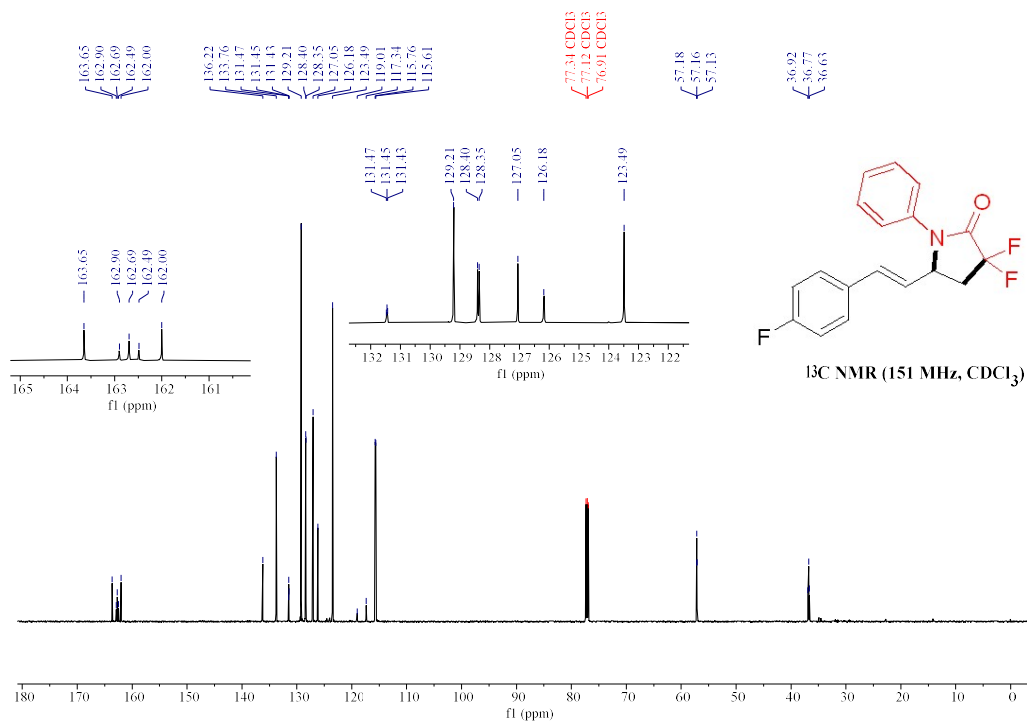

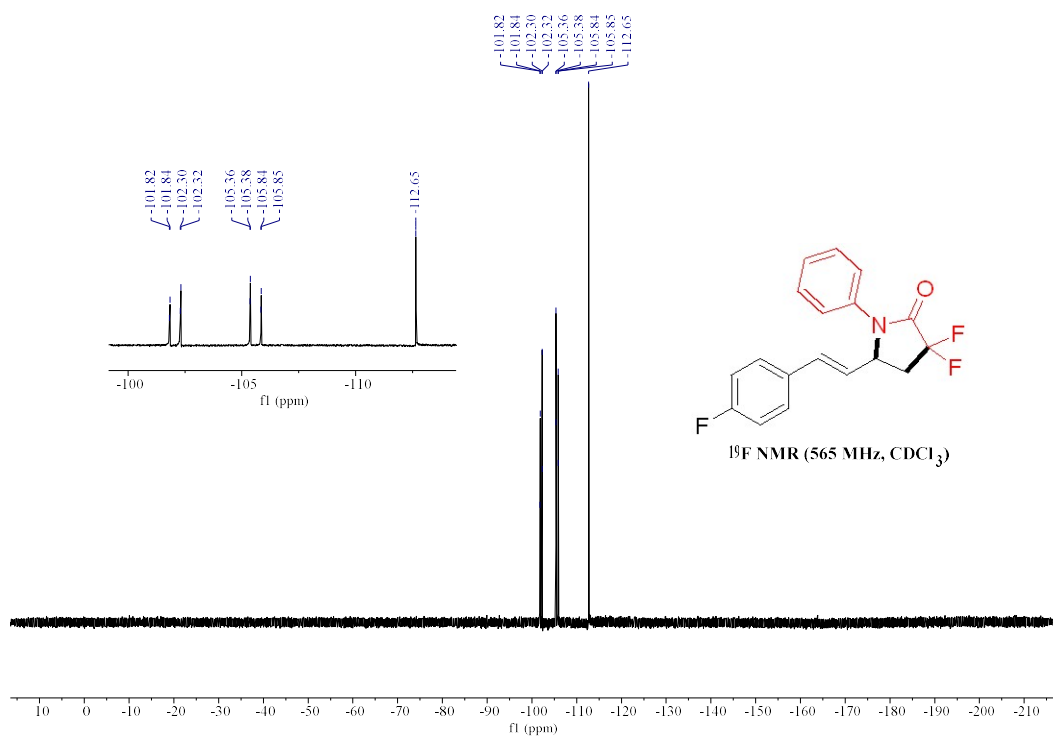





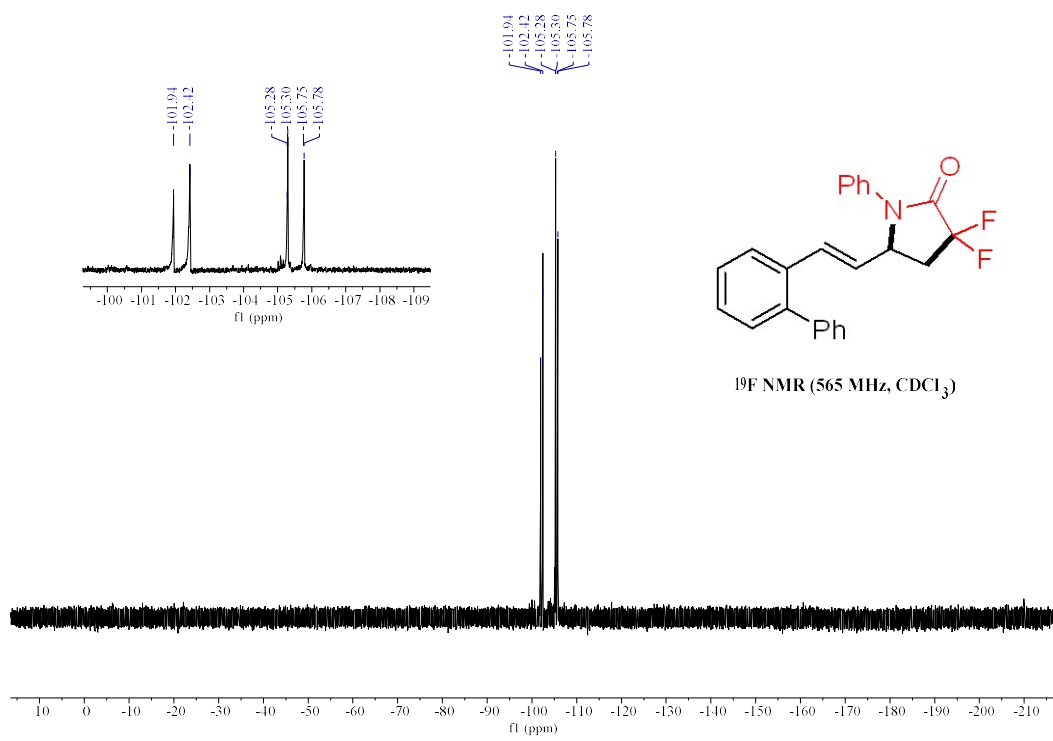

**(E)-3,3-Difluoro-1-phenyl-5-(1-phenylprop-1-en-2-yl)pyrrolidin-2-one (8d)**

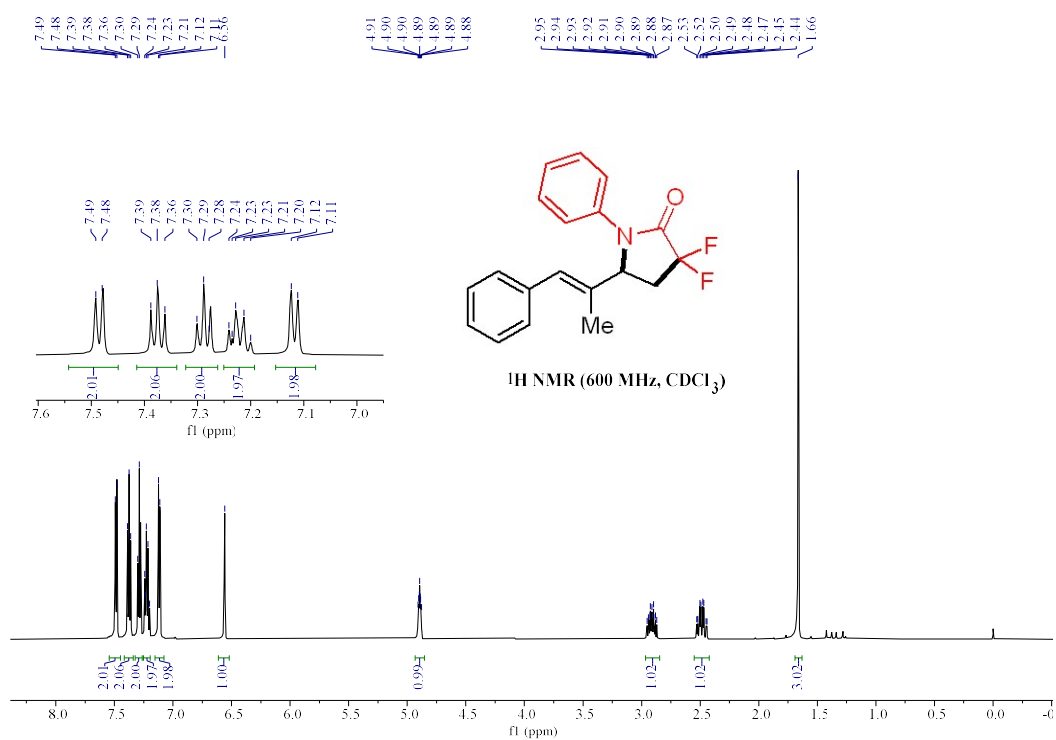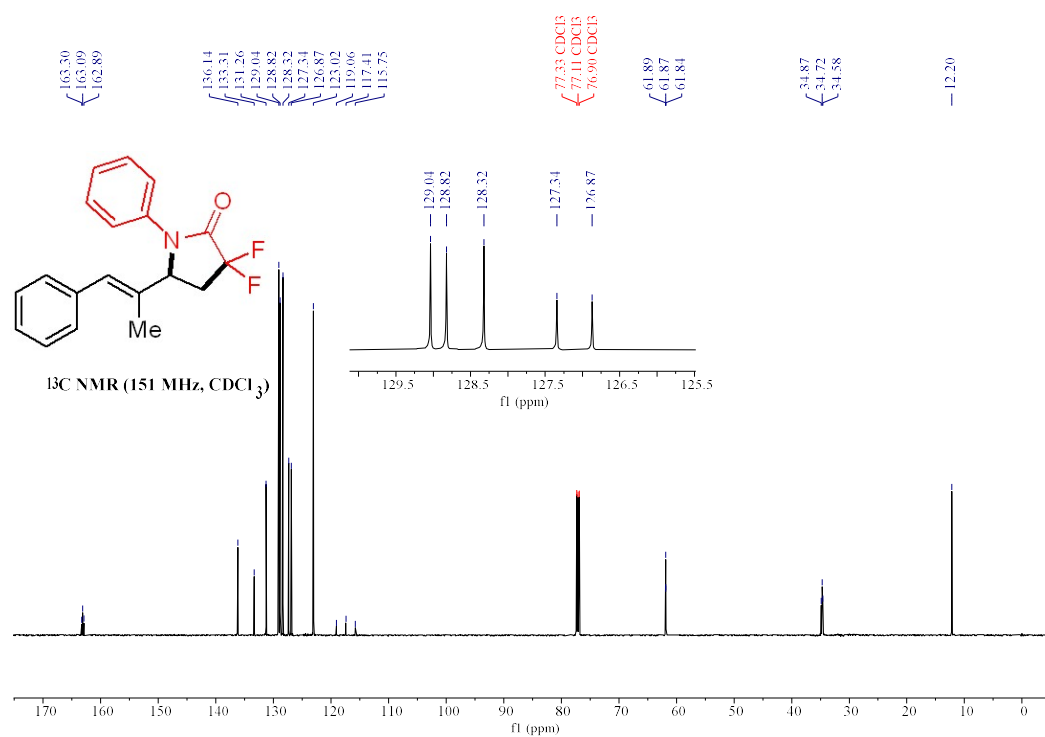

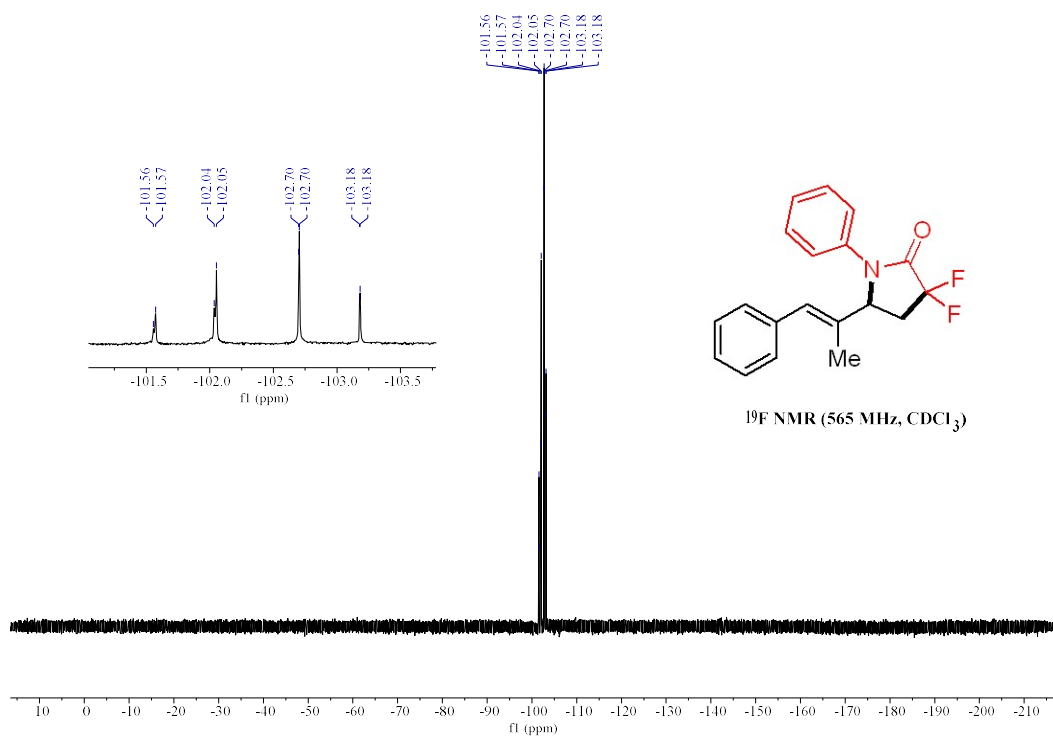

### 3,3-Difluoro-1-phenyl-5-((1E,3E)-4-phenylbuta-1,3-dien-1-yl)pyrrolidin-2-one

(8e)

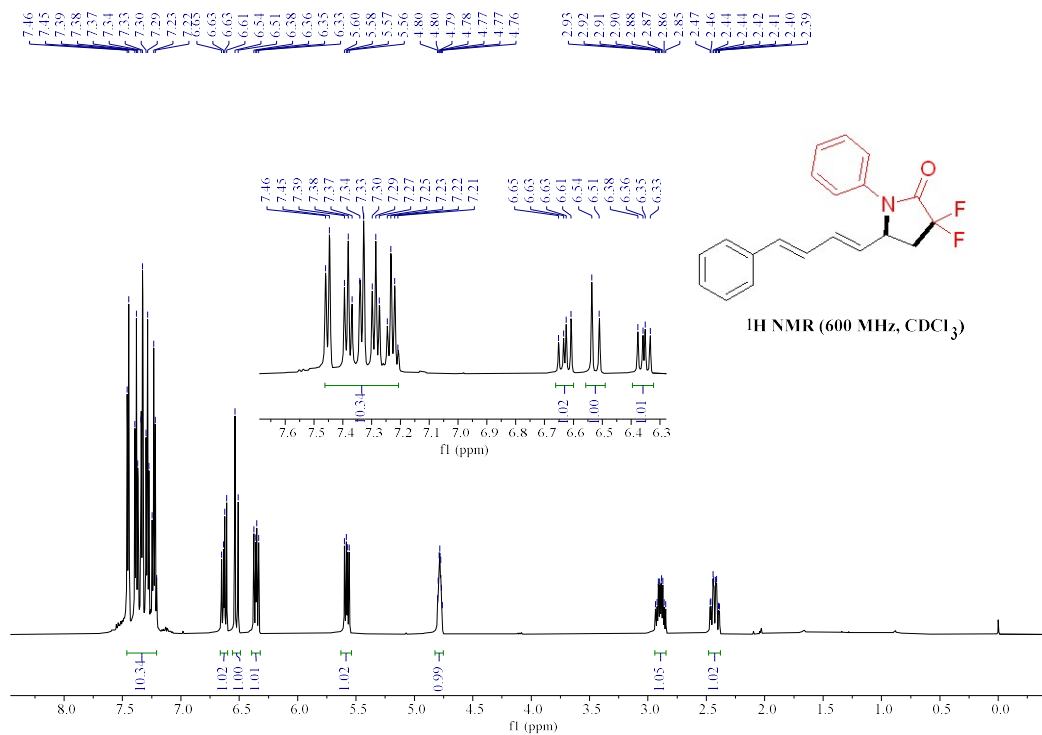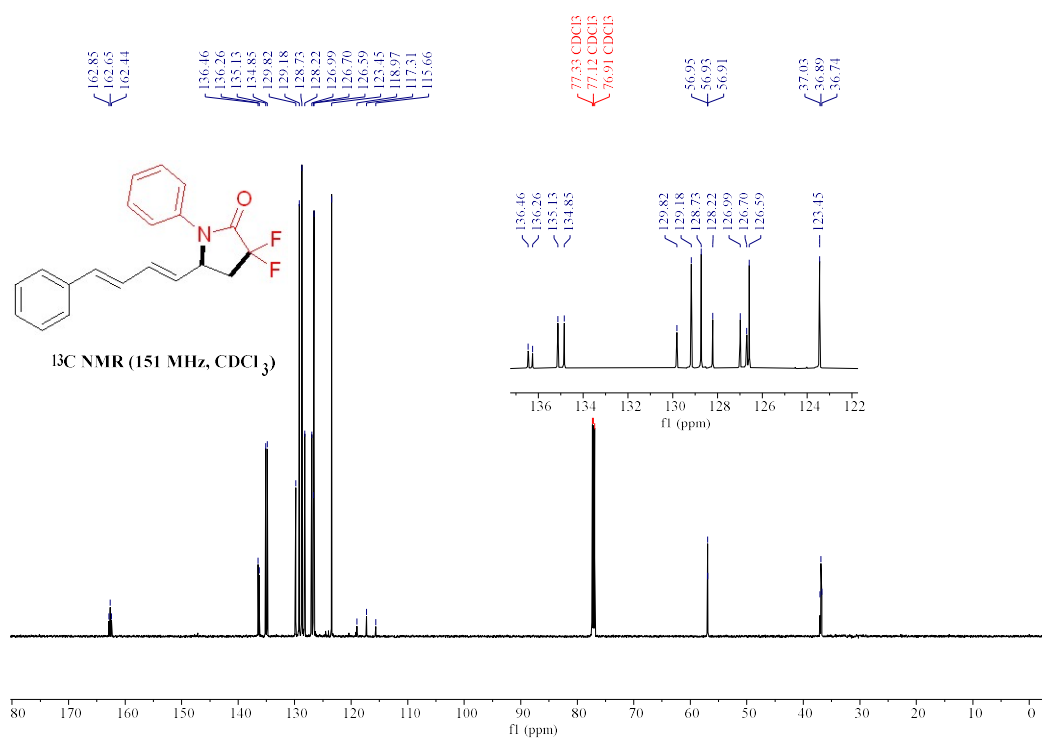

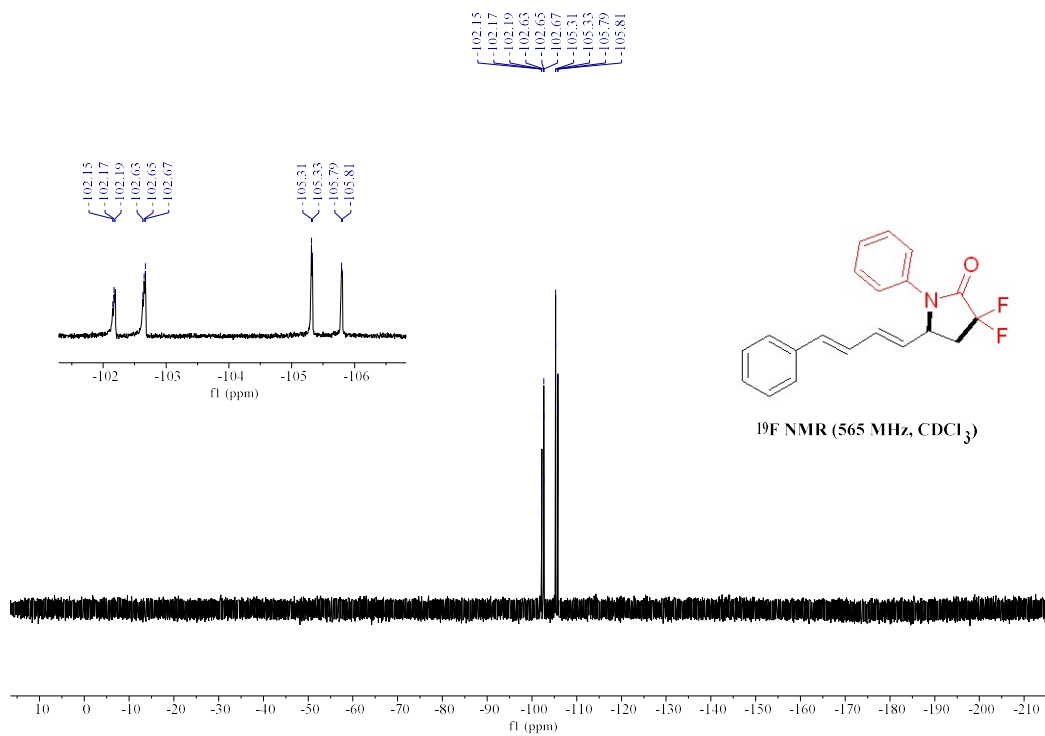

**(E)-3,3-Difluoro-1-phenyl-5-(4-phenylbut-1-en-1-yl)pyrrolidin-2-one (8f)**

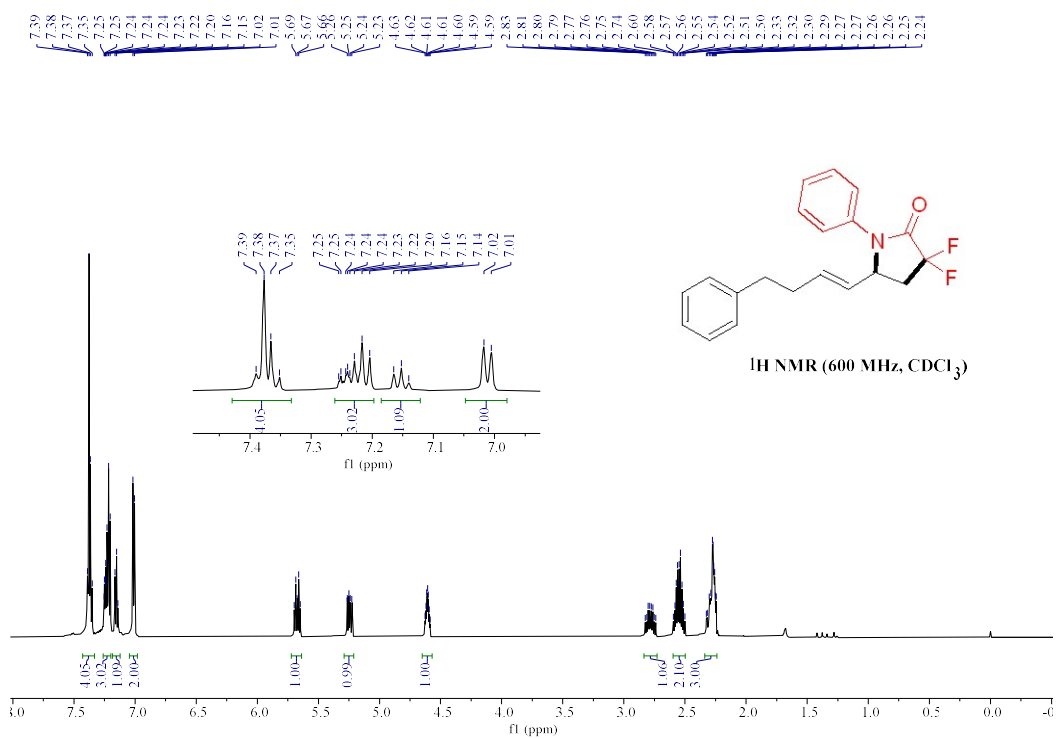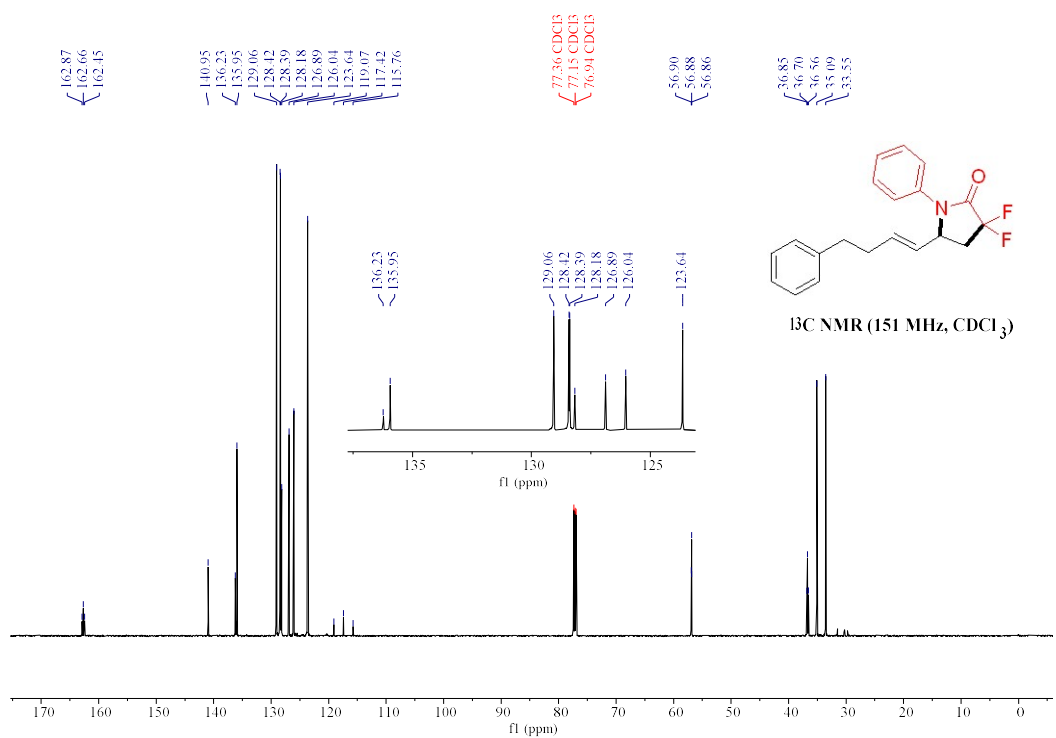

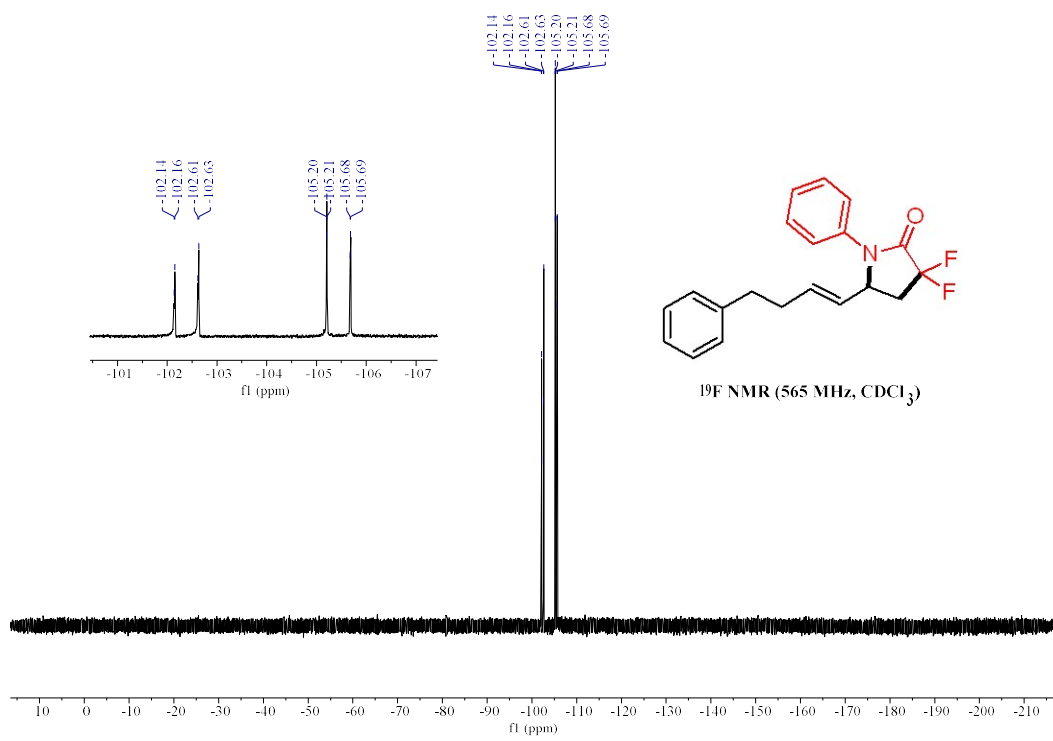



# Methyl

## (*E*)-1-cyclopropyl-7-(4-(6,6-difluoro-1-phenylhex-1-en-3-yl)piperazin-1-yl)-6-fluoro-4-oxo-1,4-dihydroquinoline-3-carboxylate (9a)

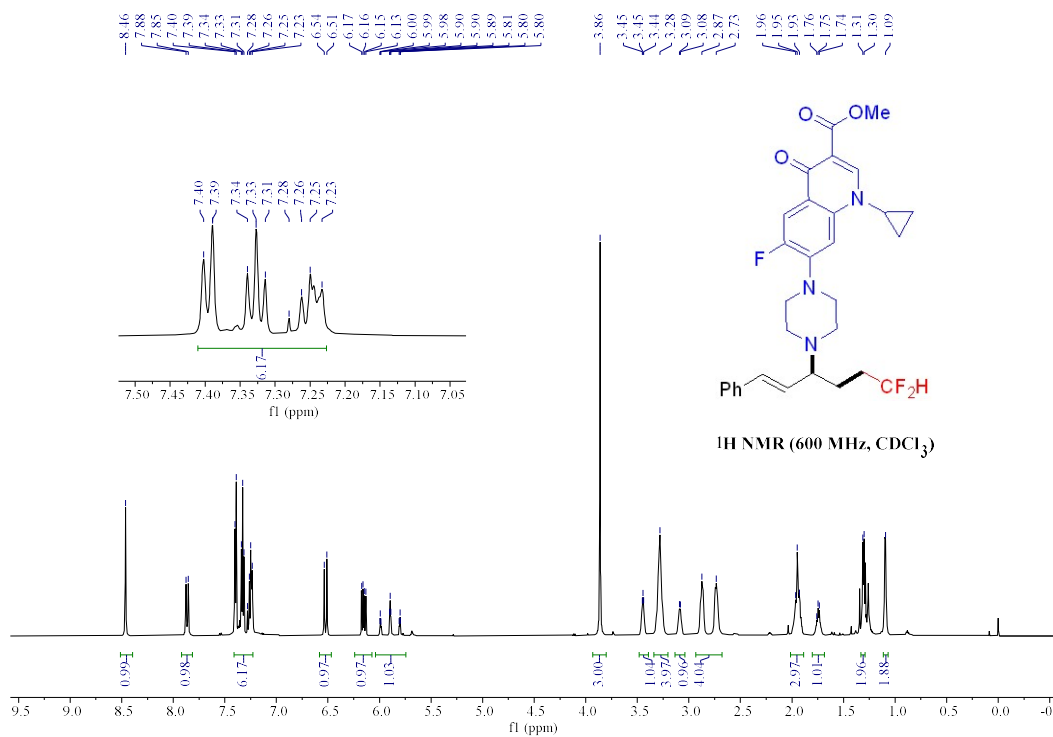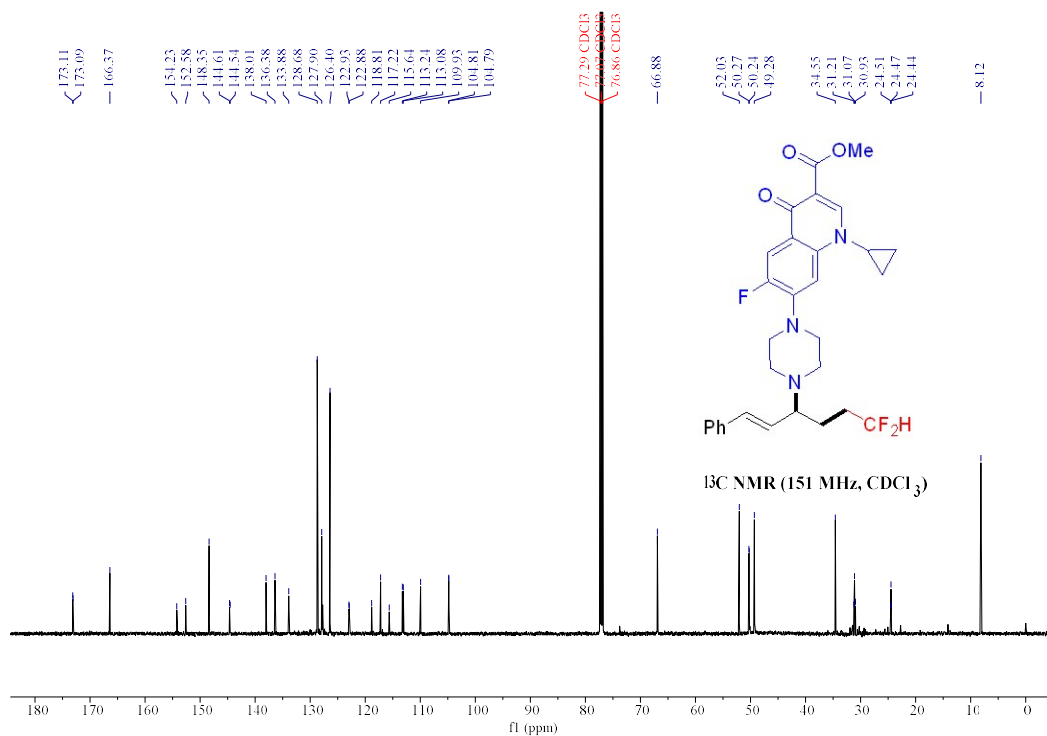

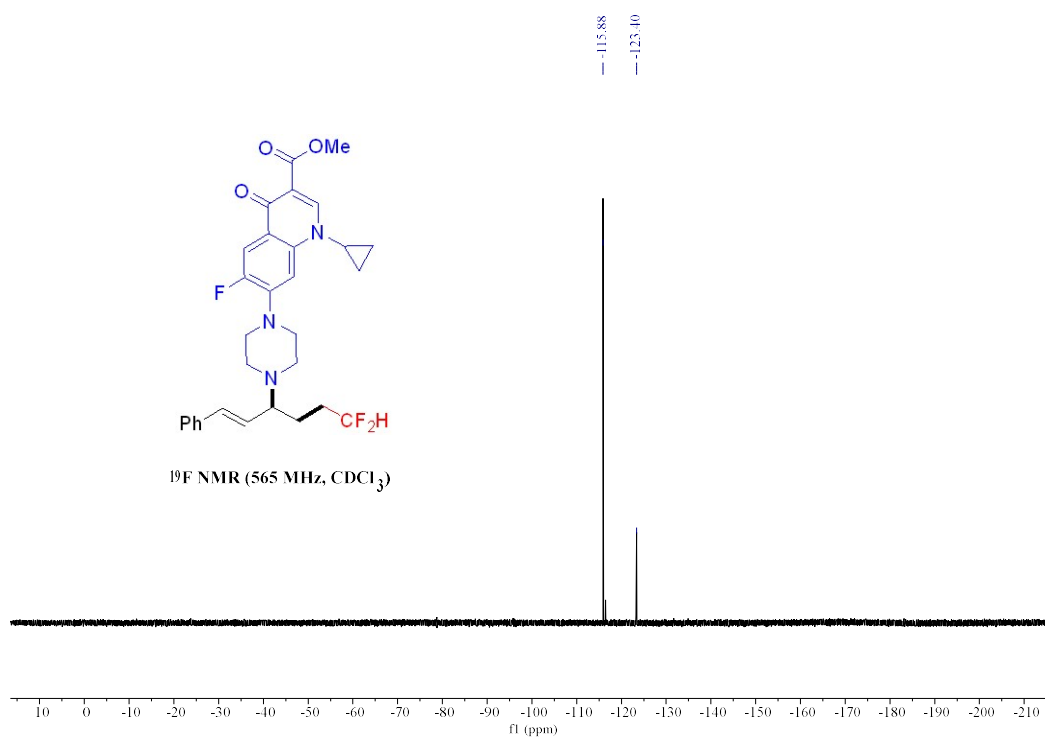

**(3*S*,4*R*)-3-((Benzo[*d*][1,3]dioxol-5-yloxy)methyl)-1-((*E*)-6,6-difluoro-1-phenylhex-1-en-3-yl)-4-(4-fluorophenyl)piperidine (9b)**

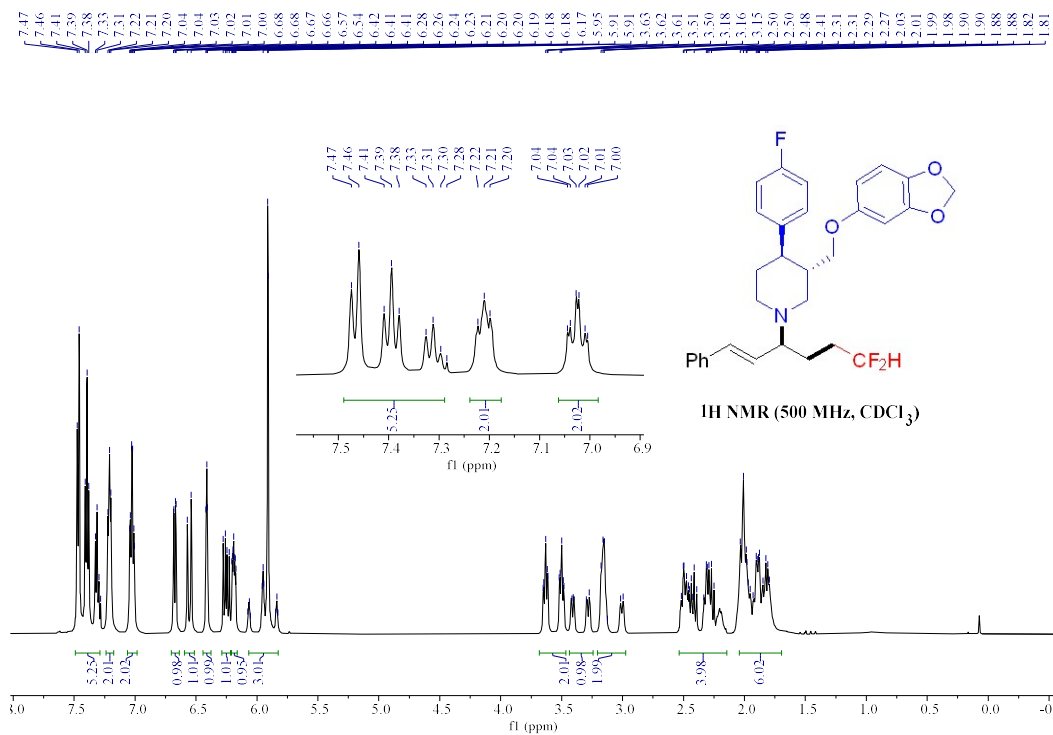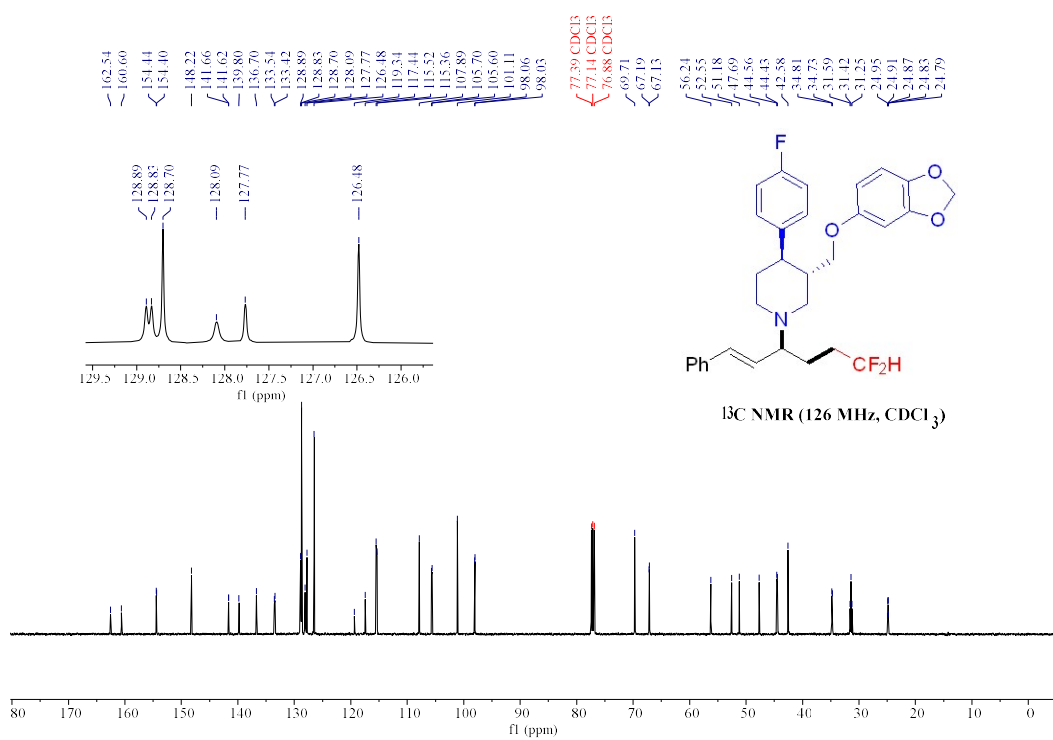

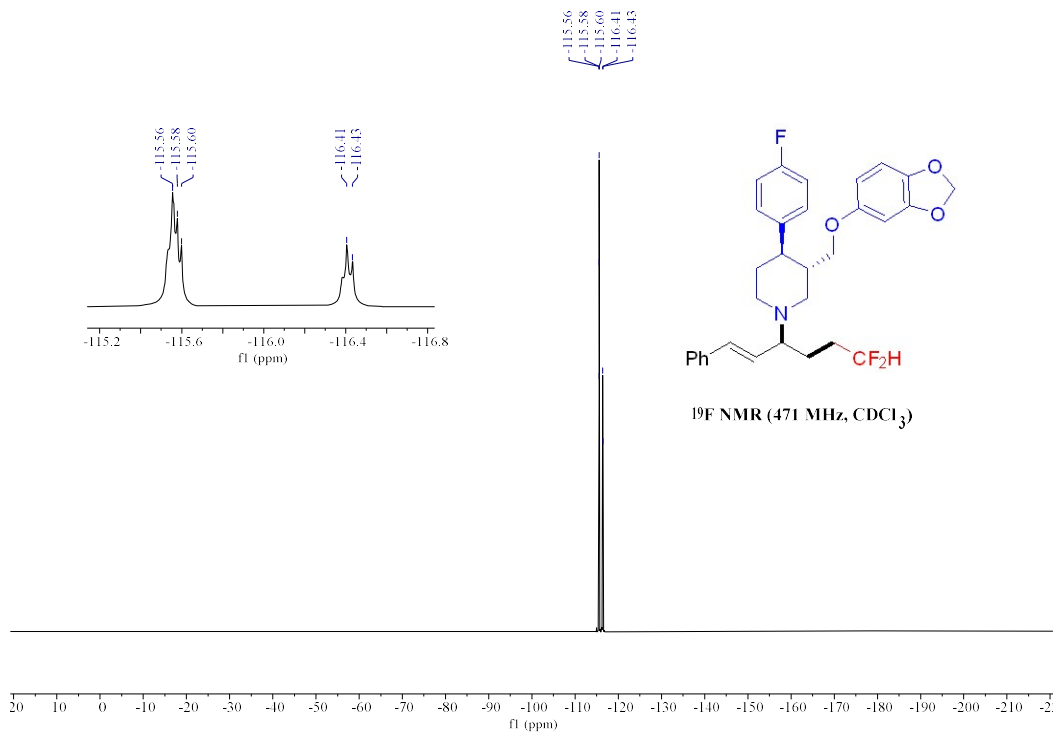

**4-((4-Chlorophenyl)(phenyl)methyl)-1-((S,E)-5,5,6,6,7,7,8,8,8-nonafluoro-1-phenyloct-2-en-1-yl)piperidine (9c)**

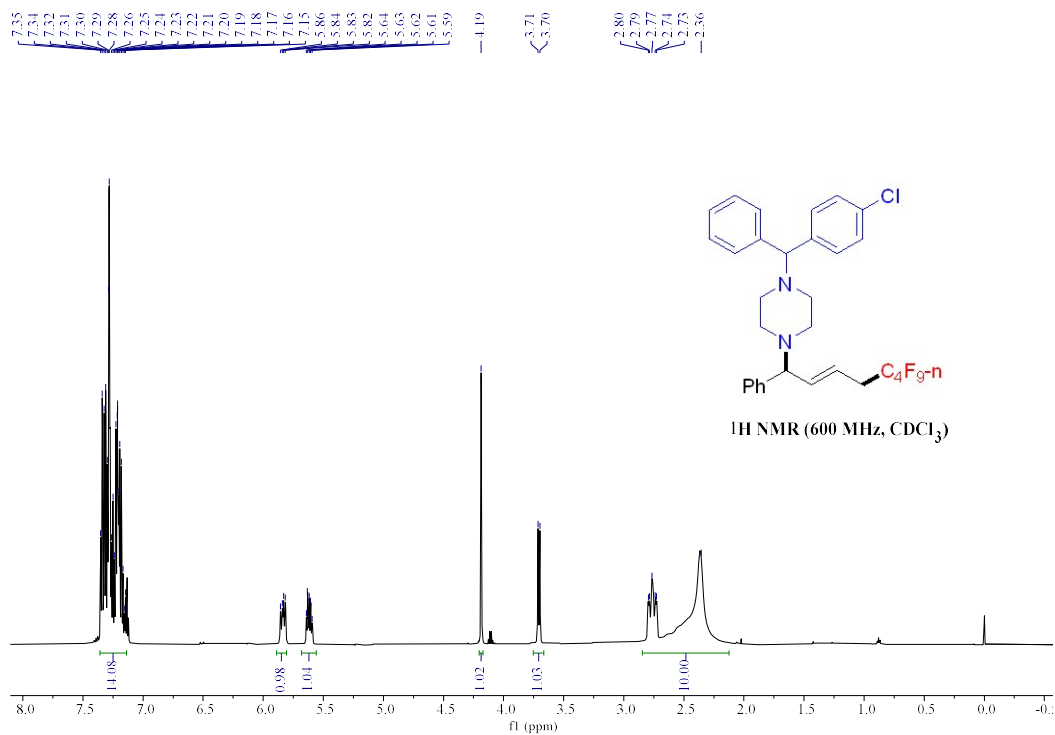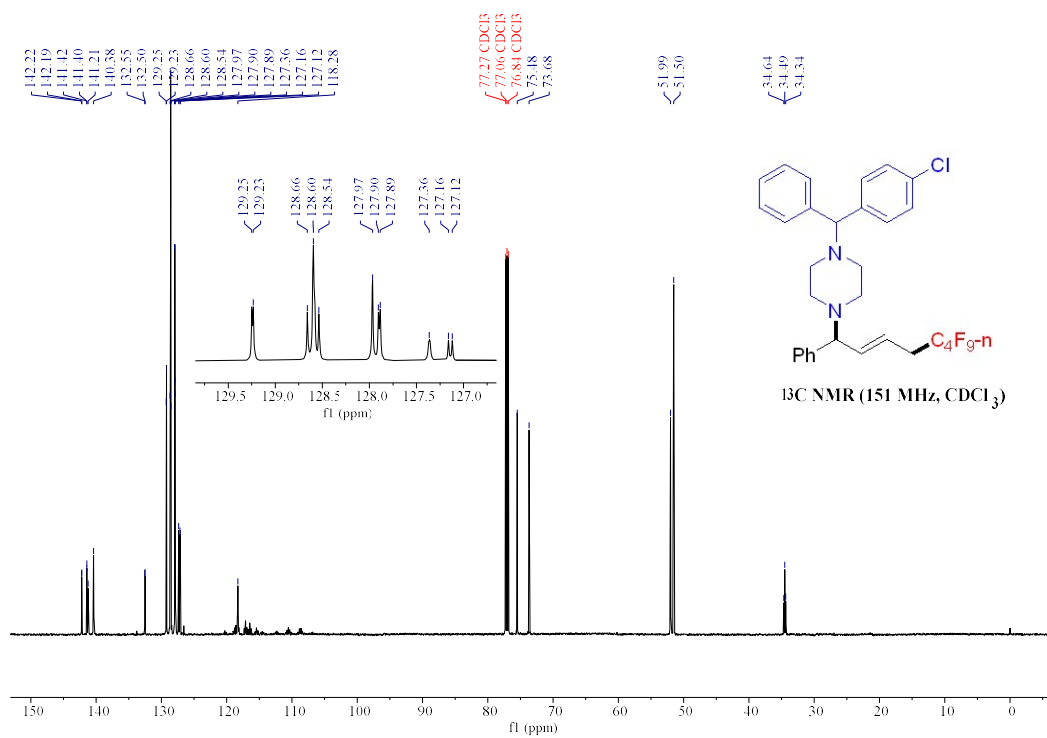

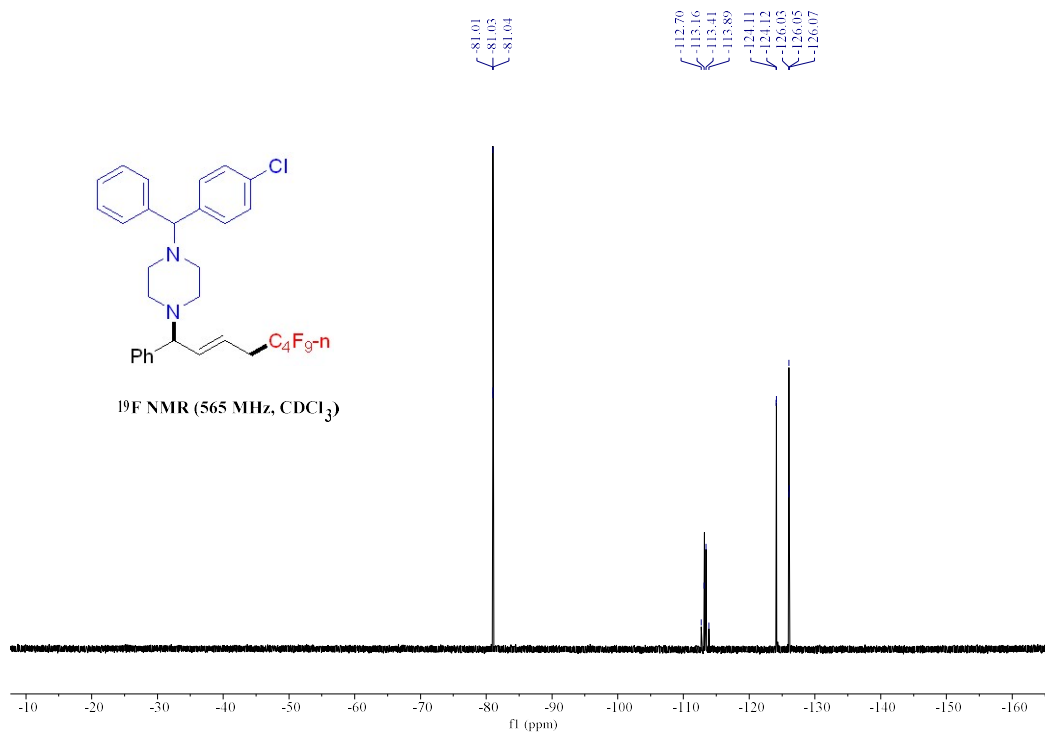

# *N*-Benzyl-6,6-difluoro-*N*-methyl-1-phenylhex-1-yn-3-amine (11)

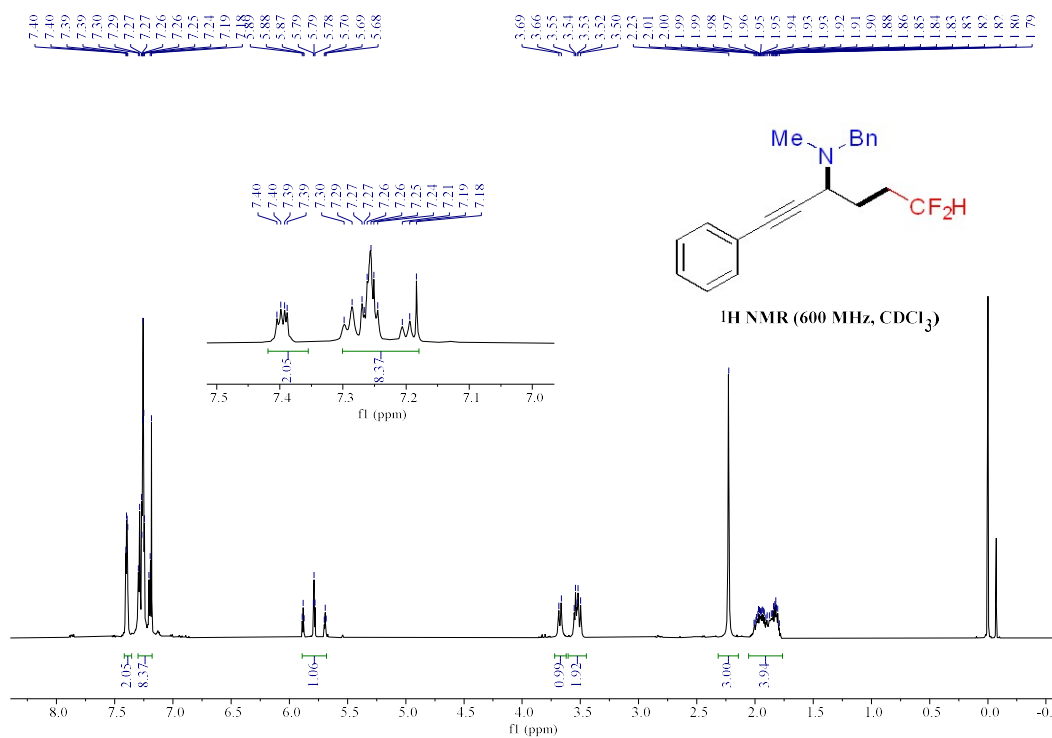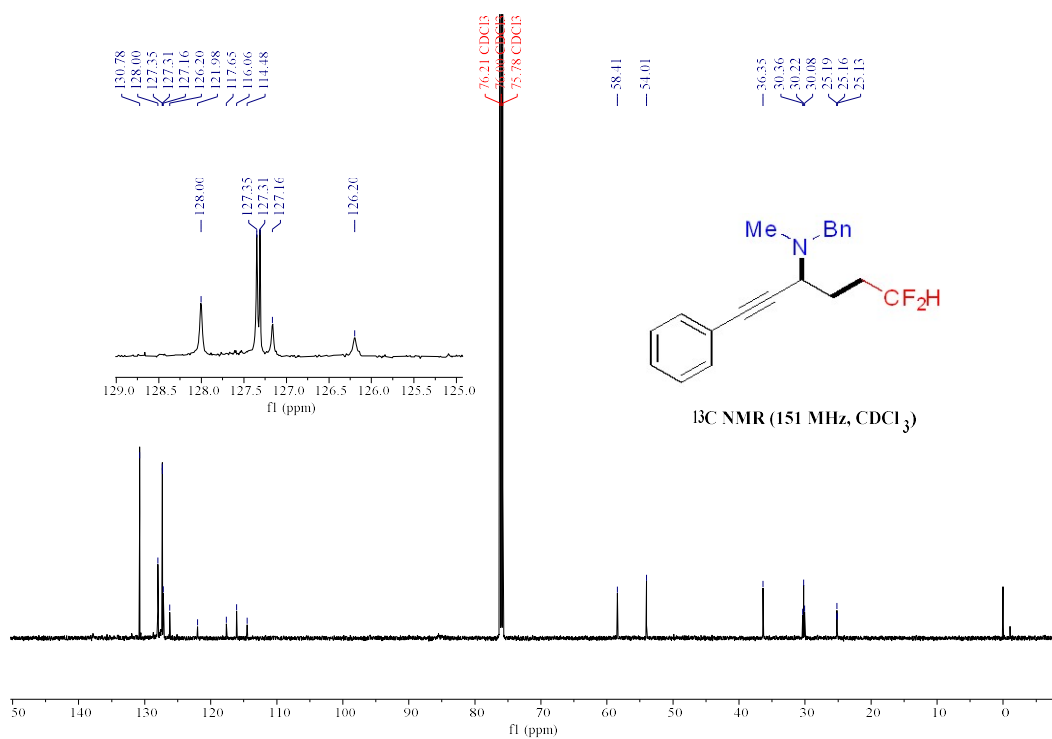

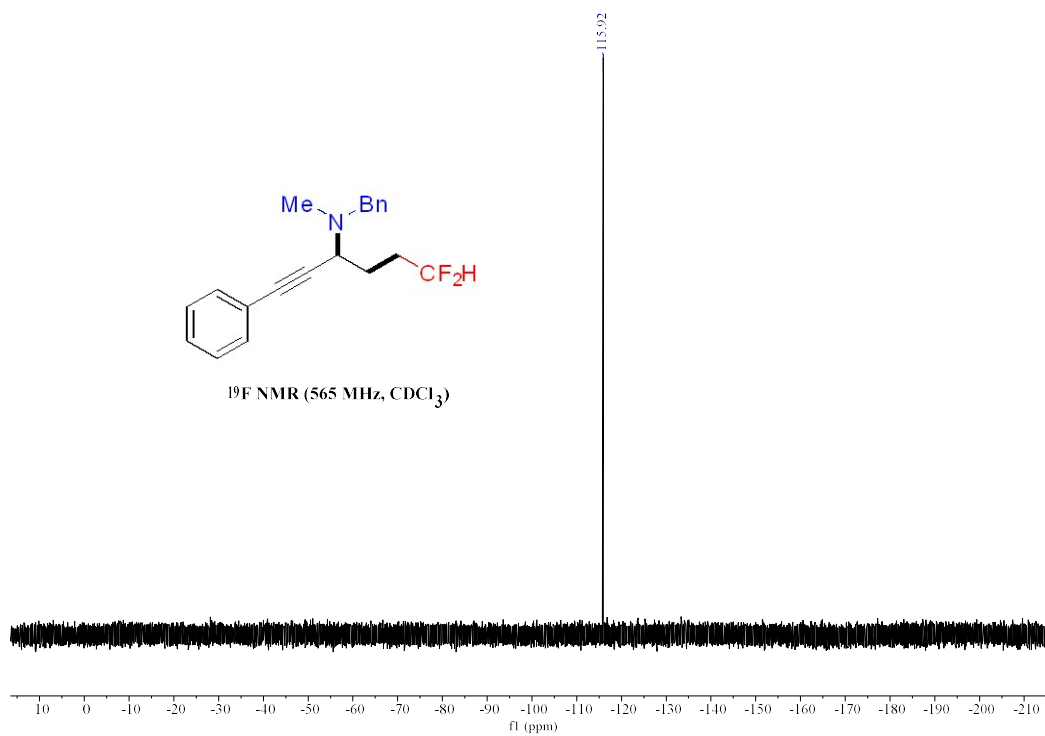

Supplement: d2cc00983h1.pdf [file d2cc00983h1.pdf]
